# Supplementary material for: Sensory conflict disrupts circadian rhythms in the sea anemone Nematostella vectensis
Source: bioRxiv preprint, doi:10.1101/2022.04.11.487933, version 3 (2022-06-21)
Supplement: Figure 5, source data 2 [file 487933_file04.xlsx]

## Sheet: File S2
Title of manuscript :	Sensory conflict disrupts circadian rhythms in the cnidarian Nematostella vectensis
Authors	Cory A. Berger
	Ann M. Tarrant
Description	This file contains the results of rhythmicity and differential gene expression analyses presented in the manuscript. The first sheet contains the DE results. The 2nd sheet contains the results of RAIN rhythmicity analysis and gene annotations, including GO and KEGG terms. The 3rd sheet contains the WGCNA module assignments for the Align-specific, SC-specific, and Full networks. The 4th and 5th sh…
Contacts:	atarrant@whoi.edu, cberger@whoi.edu

## Sheet: DE
		Light (Aligned)				Light (SC)				Light (Average)				Temperature				Condition (SC - Aligned)				Condition:Light Interaction				Time (hours)
Gene	AveExpr (log2CPM)	logFC	t	P.Value	adj.P.Val	logFC	t	P.Value	adj.P.Val	logFC	t	P.Value	adj.P.Val	logFC	t	P.Value	adj.P.Val	logFC	t	P.Value	adj.P.Val	logFC	t	P.Value	adj.P.Val	logFC	t	P.Value	adj.P.Val
NVEC200_000001_1.1	2.06909	-0.15486	-0.971582	0.333947	0.624999	-0.109355	-0.691802	0.4909	0.782665	-0.132107	-1.17211	0.244347	0.682774	0.00570702	0.318551	0.750829	0.874921	-0.147882	-1.32408	0.188939	0.650212	0.0455049	0.203564	0.839168	0.93305	-0.000306	-0.0806778	0.935883	0.969734
NVEC200_000002_1.1	4.08445	-0.127528	-1.40368	0.163966	0.44278	0.00686783	0.0784526	0.937648	0.98288	-0.0603303	-0.938453	0.350605	0.764741	0.0281972	2.85397	0.00539353	0.037441	0.0761664	1.23197	0.221274	0.67792	0.134396	1.08638	0.280304	0.550225	0.000373558	0.179098	0.858276	0.930562
NVEC200_000003_1.1	3.94081	-0.0554564	-0.487995	0.626779	0.829953	0.153789	1.37473	0.172739	0.488861	0.0491665	0.611778	0.542277	0.860066	0.0107047	0.84884	0.398296	0.626465	-0.0743494	-0.944121	0.347718	0.77444	0.209246	1.32278	0.189368	0.441009	-0.000993998	-0.375255	0.708382	0.847
NVEC200_000005_1.1	7.27923	0.132423	2.73411	0.00757489	0.0743815	-0.101061	-2.12422	0.0364838	0.220085	0.015681	0.457797	0.648237	0.899767	-0.0126055	-2.36218	0.0203945	0.095557	0.0965355	2.88332	0.0049556	0.184958	-0.233484	-3.47081	0.000809305	0.0100603	-0.00379039	-3.32851	0.00128055	0.0134556
NVEC200_000006_1.1	4.91401	0.0382968	0.487677	0.627003	0.829953	0.0274317	0.360122	0.719627	0.903179	0.0328642	0.591571	0.555669	0.866708	0.00597534	0.696468	0.487989	0.700857	0.0380696	0.710414	0.479344	0.846095	-0.0108651	-0.100909	0.919854	0.970519	-0.00686202	-3.78154	0.000284978	0.00433068
NVEC200_000007_1.1	2.4621	0.450922	2.4494	0.0163102	0.119785	-0.310781	-1.72043	0.0889025	0.352479	0.0700704	0.538185	0.591821	0.880585	-0.0149238	-0.736457	0.46343	0.683057	-0.168294	-1.33445	0.185531	0.64904	-0.761703	-2.98218	0.00371043	0.0310102	0.00293621	0.693091	0.490095	0.698173
NVEC200_000008_1.1	3.05278	-0.0952113	-0.678318	0.499367	0.752807	-0.295919	-2.13616	0.0354698	0.216625	-0.195565	-1.97022	0.0519878	0.45079	0.00282368	0.179875	0.857668	0.935597	-0.124706	-1.27554	0.205508	0.661839	-0.200708	-1.02459	0.308394	0.579015	0.00386517	1.1591	0.24958	0.472852
NVEC200_000010_1.1	7.63763	-0.184998	-3.12671	0.00240249	0.034134	-0.0597344	-1.02232	0.309459	0.646032	-0.122366	-2.92458	0.00439536	0.234942	0.0105179	1.60405	0.11232	0.2928	-0.00301334	-0.0731009	0.941893	0.990136	0.125264	1.51603	0.13313	0.362502	0.0063559	4.53118	1.85447e-05	0.000525318
NVEC200_000012_1.1	3.16108	0.269672	2.07294	0.0411308	0.209558	-0.0441794	-0.353876	0.724286	0.905284	0.112747	1.22461	0.22402	0.669127	-0.0343107	-2.44014	0.0167063	0.0839344	0.0183297	0.211002	0.833378	0.965153	-0.313852	-1.77927	0.078681	0.263499	0.00429627	1.4681	0.145675	0.339613
NVEC200_000013_1.1	3.28061	-0.109455	-0.813072	0.418392	0.695472	-0.104028	-0.770669	0.442987	0.752637	-0.106742	-1.12135	0.26522	0.705639	-0.00021313	-0.0139457	0.988905	0.995178	-0.215491	-2.25798	0.0264446	0.350334	0.00542695	0.0284288	0.977385	0.990901	0.000951062	0.293796	0.769612	0.885411
NVEC200_000014_1.1	2.70627	0.0927435	0.609481	0.543791	0.779736	-0.10293	-0.705273	0.482521	0.777806	-0.00509347	-0.0472962	0.962385	0.99351	0.0233883	1.42038	0.159066	0.363081	0.0370053	0.35885	0.720575	0.931482	-0.195674	-0.948953	0.345268	0.615802	-0.000813864	-0.235039	0.81473	0.908013
NVEC200_000016_1.1	-0.0521065	0.725914	1.07697	0.284932	0.582466	1.42644	2.07298	0.0415938	0.236047	1.07618	2.25747	0.0268753	0.388254	0.0188702	0.257952	0.797147	0.900747	-0.156411	-0.336602	0.737353	0.936328	0.700525	0.720011	0.473746	0.724234	0.0236787	1.62539	0.108256	0.28335
NVEC200_000017_1.1	5.72117	0.0966497	1.3103	0.193537	0.482823	-0.0706398	-0.977887	0.330836	0.664592	0.013005	0.249287	0.803725	0.95774	0.00757069	0.931631	0.3541	0.587095	-0.0185513	-0.364203	0.716589	0.930061	-0.167289	-1.63792	0.105044	0.314474	-0.000806893	-0.468106	0.640877	0.805603
NVEC200_000018_1.1	8.22048	0.0158667	0.276759	0.78262	0.908206	-0.0234295	-0.412609	0.680906	0.881814	-0.00378139	-0.0932741	0.9259	0.986738	-0.0207922	-3.26612	0.00155979	0.0154148	-0.0719818	-1.79868	0.0755302	0.493657	-0.0392963	-0.489363	0.625814	0.822685	0.00815403	5.99088	4.57137e-08	4.79115e-06
NVEC200_000019_1.1	6.45881	-0.0967307	-0.861322	0.391811	0.675635	0.00650392	0.0594712	0.952735	0.986934	-0.0451134	-0.567895	0.571805	0.874785	-0.00457314	-0.372185	0.710806	0.854981	0.15272	1.98785	0.050485	0.438461	0.103235	0.667734	0.506356	0.74508	-0.00331371	-1.26487	0.209841	0.424828
NVEC200_000020_1.1	6.78131	0.184584	2.74958	0.00725398	0.072003	-0.171297	-2.58725	0.011331	0.116854	0.00664345	0.139939	0.889031	0.978594	-0.0132006	-1.77568	0.0792751	0.232993	-0.0511594	-1.09672	0.275783	0.725252	-0.355881	-3.80121	0.000266265	0.00431285	0.000453523	0.286352	0.775288	0.888548
NVEC200_000021_1.1	4.8797	0.0773691	0.835264	0.405853	0.686415	0.102041	1.12318	0.264444	0.600383	0.089705	1.36932	0.174416	0.626795	0.0157647	1.54096	0.126948	0.31542	-0.045116	-0.703398	0.483682	0.847466	0.0246718	0.192065	0.848138	0.93861	-0.000301486	-0.13982	0.889125	0.946739
NVEC200_000022_1.1	3.47318	-0.239031	-1.7991	0.0754637	0.290467	-0.0791111	-0.6221	0.5355	0.805905	-0.159071	-1.69157	0.0943003	0.528578	-0.00147394	-0.102598	0.918517	0.962155	0.0672284	0.756299	0.451509	0.831962	0.15992	0.890156	0.375832	0.644869	-0.00696241	-2.27746	0.0252057	0.111588
NVEC200_000023_1.1	5.77091	-0.000899921	-0.00941707	0.992509	0.996155	-0.0613838	-0.657293	0.512803	0.795069	-0.0311419	-0.46074	0.646185	0.898631	0.0121279	1.15391	0.251834	0.481624	0.0186418	0.283037	0.77785	0.94554	-0.0604839	-0.458089	0.64808	0.835605	-0.0004072	-0.182382	0.855726	0.928453
NVEC200_000024_1.1	1.36974	-0.114329	-0.483469	0.629975	0.831435	-0.369424	-1.54287	0.126484	0.422898	-0.241876	-1.4464	0.151651	0.602719	0.00931559	0.344021	0.731659	0.864419	-0.280598	-1.65116	0.102304	0.543268	-0.255095	-0.7534	0.45324	0.709623	0.0016917	0.293193	0.770071	0.885411
NVEC200_000025_1.1	8.65947	0.0198992	0.489368	0.62581	0.829268	0.0288857	0.716702	0.475474	0.774942	0.0243924	0.848308	0.39859	0.792944	-0.00944165	-2.09045	0.0394898	0.149519	-0.0832633	-2.93063	0.00431824	0.173559	0.00898654	0.157671	0.875081	0.949882	0.00168718	1.74748	0.0840764	0.242518
NVEC200_000026_1.1	8.54256	0.0332642	0.68651	0.494214	0.750395	0.035102	0.731069	0.466698	0.768466	0.0341831	0.997649	0.321211	0.745669	-0.00216526	-0.402425	0.688356	0.841097	-0.0743238	-2.19489	0.0308292	0.375262	0.00183775	0.0270655	0.978469	0.991535	0.00671125	5.83527	8.97066e-08	7.99174e-06
NVEC200_000027_1.1	3.0585	0.231414	1.36756	0.174967	0.457766	0.128176	0.775781	0.439978	0.750325	0.179795	1.50219	0.136663	0.587757	0.0015025	0.080793	0.935792	0.97025	-0.0590479	-0.509084	0.61198	0.900918	-0.103239	-0.441968	0.659607	0.842222	-0.00398429	-1.02593	0.307764	0.537309
NVEC200_000028_1.1	2.35648	-0.0788602	-0.382727	0.702854	0.871057	-0.0991611	-0.512004	0.609943	0.847304	-0.0890106	-0.60975	0.543614	0.861206	-0.0369083	-1.68847	0.0948965	0.261907	0.132667	0.992987	0.323465	0.75778	-0.0203009	-0.0742819	0.940956	0.97778	-0.000294973	-0.0645961	0.948644	0.976533
NVEC200_000029_1.1	4.90323	0.639168	4.64847	1.36136e-05	0.000709174	-0.310382	-2.32079	0.0229501	0.167846	0.164393	1.69015	0.0950485	0.529711	-0.0176616	-1.18227	0.240742	0.469195	-0.0525325	-0.561594	0.576026	0.885429	-0.949551	-5.02248	3.22396e-06	0.000116575	0.000777808	0.247636	0.805076	0.903887
NVEC200_000031_1.1	4.75324	-0.0403668	-0.506881	0.613518	0.823329	-0.049622	-0.641193	0.52308	0.799148	-0.0449944	-0.798687	0.426643	0.809097	-0.00153539	-0.175938	0.860751	0.936941	0.0307554	0.564967	0.573547	0.884625	-0.0092552	-0.0846006	0.932773	0.974714	0.0059977	3.24913	0.00164519	0.0163906
NVEC200_000032_1.1	5.39917	-0.0362672	-0.549393	0.584141	0.805699	-0.0384342	-0.596351	0.552486	0.813264	-0.0373507	-0.799941	0.42592	0.809097	-0.00915897	-1.2612	0.210601	0.430864	0.0111494	0.246229	0.806084	0.956905	-0.00216699	-0.0237825	0.98108	0.992518	0.00125157	0.81235	0.418804	0.639876
NVEC200_000034_1.1	8.04777	0.0786844	2.09751	0.038844	0.202347	-0.0156554	-0.422672	0.673575	0.87759	0.0315145	1.18797	0.238072	0.681197	-0.0189032	-4.55248	1.70909e-05	0.00046671	0.0346648	1.32885	0.187366	0.650212	-0.0943398	-1.80117	0.0751335	0.25597	0.000237825	0.268061	0.789285	0.895759
NVEC200_000035_1.1	3.46416	1.00666	1.31755	0.19182	0.481174	1.83242	2.47981	0.0154786	0.137994	1.41954	2.62606	0.0105395	0.305975	0.0610724	0.819251	0.415339	0.642367	0.28715	0.595144	0.553608	0.879562	0.825763	0.790668	0.431727	0.695534	0.0270291	1.83057	0.0712913	0.218197
NVEC200_000036_1.1	6.90599	-0.415296	-2.6102	0.0109934	0.0939479	-0.10574	-0.681511	0.497726	0.787522	-0.260518	-2.3149	0.0234614	0.373506	0.0269754	1.54772	0.126057	0.313641	0.186945	1.71044	0.0914742	0.521466	0.309556	1.41124	0.162465	0.404291	0.00348447	0.933045	0.353903	0.582136
NVEC200_000037_1.1	4.48306	-0.11863	-1.34387	0.18248	0.467776	0.232189	2.69258	0.00850153	0.101214	0.0567795	0.909384	0.365655	0.77408	0.00947027	0.975246	0.332137	0.565945	-0.00918757	-0.151734	0.879748	0.976486	0.35082	2.87753	0.00503933	0.0387937	-0.00503682	-2.46233	0.0157716	0.0819161
NVEC200_000038_1.1	4.49453	0.0825087	0.838533	0.404025	0.684761	0.250569	2.59006	0.0112458	0.116475	0.166539	2.39326	0.0188455	0.347191	-0.0195179	-1.79395	0.0762885	0.227643	-0.0669454	-0.989819	0.325002	0.758606	0.168061	1.22856	0.222542	0.486302	0.0074719	3.28312	0.00147856	0.0150724
NVEC200_000039_1.1	5.59961	0.0407107	0.637733	0.525319	0.768168	-0.152988	-2.45445	0.0160979	0.14066	-0.0561388	-1.24333	0.217081	0.66162	0.0214131	3.05218	0.00301122	0.0249622	0.0149268	0.338813	0.735565	0.935785	-0.193699	-2.19805	0.0305953	0.140141	0.00300441	2.016	0.046879	0.16788
NVEC200_000040_1.1	3.60493	0.0577948	0.426695	0.670654	0.854007	-0.0823044	-0.599113	0.550652	0.812407	-0.0122548	-0.12794	0.898492	0.980291	-0.0228943	-1.47236	0.144525	0.342849	-0.27793	-2.86702	0.00519465	0.188944	-0.140099	-0.721188	0.472724	0.72386	0.0166139	5.06323	2.27495e-06	0.000100245
NVEC200_000041_1.1	5.34804	-0.133275	-1.81321	0.0732415	0.285977	0.043104	0.601583	0.549013	0.811859	-0.0450854	-0.86718	0.388224	0.786437	0.0120634	1.49485	0.138564	0.334546	0.0316139	0.626421	0.532676	0.869951	0.176379	1.74124	0.0851699	0.275041	0.00172369	1.00706	0.316692	0.54629
NVEC200_000042_1.1	4.52563	0.253595	2.5834	0.0114493	0.0960761	-0.141706	-1.49491	0.138549	0.442548	0.0559442	0.805481	0.422734	0.808308	-0.00335909	-0.315126	0.753419	0.87589	0.0508681	0.764063	0.446893	0.830826	-0.395301	-2.95069	0.00407155	0.0332595	-0.00627131	-2.78503	0.00656499	0.0445174
NVEC200_000043_1.1	4.13744	-0.132433	-1.37999	0.17112	0.452226	0.0557565	0.602293	0.548543	0.811624	-0.0383384	-0.564605	0.573793	0.875369	-0.0316086	-3.02174	0.00329879	0.0264625	0.053159	0.825642	0.411261	0.813297	0.18819	1.43845	0.153886	0.392587	-0.000607733	-0.275968	0.783226	0.891844
NVEC200_000044_1.1	5.81342	-0.0817809	-1.06074	0.291738	0.58913	-0.0460144	-0.610273	0.543269	0.809667	-0.0638977	-1.17179	0.244474	0.682774	-0.00163469	-0.192544	0.847764	0.930489	0.011747	0.22137	0.825322	0.962116	0.0357666	0.33551	0.738046	0.884145	0.000148709	0.0823709	0.934541	0.968984
NVEC200_000045_1.1	4.68528	0.11312	1.4756	0.143654	0.411291	-0.0658868	-0.882465	0.379953	0.707219	0.0236168	0.435525	0.664258	0.904802	-0.00175933	-0.209059	0.83489	0.923081	-0.0204124	-0.388792	0.698378	0.924304	-0.179007	-1.69596	0.0934634	0.291191	-0.00513518	-2.88703	0.00490277	0.0361799
NVEC200_000046_1.1	4.232	0.0618671	0.589237	0.557226	0.788466	0.192276	1.83595	0.0697739	0.30966	0.127072	1.71156	0.0905333	0.52328	-0.0302699	-2.56374	0.0120689	0.0668358	-0.152525	-2.08452	0.0400388	0.409849	0.130409	0.880503	0.381008	0.650373	-0.000332582	-0.134529	0.893294	0.94823
NVEC200_000047_1.1	2.15273	0.166863	0.845788	0.399987	0.681295	0.0841502	0.448257	0.65508	0.867667	0.125507	0.898558	0.371364	0.776492	-0.00846147	-0.400754	0.689582	0.841545	0.118269	0.905779	0.36755	0.788459	-0.0827127	-0.311978	0.755803	0.892588	0.00426368	0.97462	0.332446	0.561567
NVEC200_000048_1.1	5.95499	-0.129061	-1.92364	0.0576629	0.251926	0.024055	0.366187	0.715113	0.900225	-0.0525032	-1.10645	0.271575	0.709602	-0.00785702	-1.06228	0.291045	0.524131	0.0151784	0.328673	0.743191	0.937844	0.153116	1.64856	0.102837	0.309947	-0.000406375	-0.258257	0.796818	0.899777
NVEC200_000049_1.1	9.02853	0.175614	2.08655	0.0402488	0.206312	0.0558093	0.670252	0.504709	0.790331	0.115712	1.94419	0.055537	0.453206	-0.00826867	-0.886443	0.378148	0.609219	-0.00587026	-0.100055	0.920561	0.98553	-0.119805	-1.01746	0.312133	0.583003	0.000482592	0.242213	0.809261	0.905531
NVEC200_000050_1.1	5.13184	0.00774042	0.101393	0.919471	0.967972	-0.036435	-0.484845	0.629003	0.856812	-0.0143473	-0.265751	0.791059	0.952245	-0.00903788	-1.06609	0.289326	0.52237	-0.0923349	-1.7463	0.0842817	0.510738	-0.0441754	-0.415724	0.678634	0.852317	-0.001201	-0.668951	0.505294	0.709524
NVEC200_000052_1.1	5.37098	0.082185	1.35584	0.178652	0.463169	-0.0323288	-0.537696	0.592157	0.838321	0.0249281	0.581575	0.562354	0.869306	-0.0351423	-5.18159	1.40449e-06	6.46695e-05	-0.150257	-3.55759	0.000608089	0.0667486	-0.114514	-1.3468	0.181534	0.430911	0.00861926	6.00763	4.24959e-08	4.6234e-06
NVEC200_000053_1.1	3.05754	0.0165147	0.120029	0.904736	0.962099	0.161779	1.18833	0.237933	0.571064	0.0891471	0.916249	0.362064	0.773878	0.00881498	0.574251	0.567277	0.757643	-0.121595	-1.26806	0.208152	0.665616	0.145265	0.75454	0.452559	0.709301	-0.00156871	-0.488303	0.626562	0.79502
NVEC200_000054_1.1	5.29924	-0.0400451	-0.422347	0.673812	0.855754	-0.0518243	-0.56018	0.576793	0.828192	-0.0459347	-0.684928	0.495207	0.840199	-0.0105499	-1.01173	0.314467	0.547927	-0.000210016	-0.00323182	0.997429	0.999916	-0.0117792	-0.0900601	0.928446	0.973087	0.000854004	0.386269	0.700239	0.84164
NVEC200_000055_1.1	2.8877	-0.360265	-2.08331	0.0401516	0.206312	-0.140484	-0.828077	0.409889	0.729363	-0.250374	-2.04719	0.0436506	0.426002	-0.0220397	-1.14403	0.255742	0.485904	-0.13145	-1.11048	0.269846	0.721266	0.219781	0.916225	0.362077	0.632207	-0.00623539	-1.51233	0.134068	0.323183
NVEC200_000056_1.1	5.55863	0.59196	7.90863	7.50506e-12	3.54874e-09	-0.484407	-6.59864	3.09937e-09	1.58765e-06	0.0537765	1.01586	0.312506	0.740462	-0.0238662	-2.90561	0.00464527	0.0337923	-0.0924468	-1.79675	0.0758383	0.494099	-1.07637	-10.3699	6.98433e-17	5.36659e-14	0.00218026	1.25394	0.213218	0.428808
NVEC200_000057_1.1	3.26177	-0.118614	-0.885542	0.378301	0.666595	0.0535488	0.400568	0.689718	0.886281	-0.0325325	-0.343483	0.732062	0.927826	-0.000728673	-0.0481918	0.961674	0.98308	-0.175795	-1.86514	0.0655268	0.471845	0.172163	0.910649	0.364991	0.634593	0.00769409	2.41615	0.0177723	0.088999
NVEC200_000058_1.1	4.33131	-0.123886	-1.0427	0.299971	0.595501	0.105309	0.925749	0.357132	0.690072	-0.00928841	-0.110454	0.912303	0.983062	0.0211543	1.65267	0.101996	0.275591	0.135364	1.69486	0.0936718	0.524648	0.229195	1.42616	0.157395	0.396844	-0.00586274	-2.17253	0.0325294	0.131942
NVEC200_000059_1.1	3.15456	0.0138403	0.106763	0.915222	0.965815	-0.0642072	-0.501729	0.617123	0.851304	-0.0251835	-0.274708	0.784191	0.949963	-0.0474268	-3.25786	0.0016008	0.015669	-0.106316	-1.18921	0.237588	0.696283	-0.0780475	-0.431287	0.667325	0.84728	0.00734479	2.40838	0.0181301	0.0900936
NVEC200_000061_1.1	2.48701	-0.431725	-2.64393	0.00971742	0.0873767	0.145164	0.876303	0.383274	0.709634	-0.14328	-1.24079	0.218012	0.662166	0.0501152	2.68159	0.00876336	0.0531499	-0.297672	-2.52233	0.0134742	0.275199	0.576889	2.46272	0.0157554	0.0886079	0.00046353	0.116951	0.907168	0.955024
NVEC200_000062_1.1	4.76779	-0.347917	-4.06185	0.000106109	0.0034976	0.304035	3.64882	0.000448127	0.0158114	-0.021941	-0.362121	0.718138	0.923632	0.016069	1.7153	0.0898436	0.252408	0.0540175	0.923966	0.358055	0.78173	0.651951	5.53482	3.23178e-07	1.70521e-05	0.0031489	1.59298	0.114785	0.294729
NVEC200_000065_1.1	3.33785	0.0129075	0.104673	0.916876	0.966564	0.0867516	0.713136	0.477666	0.775908	0.0498296	0.571418	0.569187	0.873033	-0.00372825	-0.271385	0.786736	0.894537	-0.101821	-1.191	0.236887	0.695267	0.0738441	0.429276	0.668781	0.84728	0.00429168	1.49135	0.13948	0.33078
NVEC200_000066_1.1	2.99069	-0.0456698	-0.307253	0.759383	0.898155	0.0802091	0.571427	0.569181	0.823624	0.0172696	0.164041	0.870079	0.974902	0.0291618	1.85325	0.06723	0.21007	0.134648	1.37286	0.173319	0.635184	0.125879	0.6353	0.526897	0.759326	-0.00136663	-0.417242	0.677527	0.827356
NVEC200_000067_1.1	3.8368	0.0122515	0.113859	0.909612	0.963699	0.0680219	0.650571	0.517035	0.797544	0.0401367	0.527296	0.599328	0.883704	0.0155134	1.31578	0.191697	0.406893	-0.00182641	-0.0248066	0.980266	0.997936	0.0557704	0.377333	0.706843	0.866826	-0.000653907	-0.263967	0.792428	0.89741
NVEC200_000068_1.1	4.056	-0.096679	-0.767926	0.444607	0.715858	0.198406	1.58876	0.115735	0.405715	0.0508635	0.57134	0.56924	0.873033	0.037674	2.67624	0.00889358	0.0535444	-0.129692	-1.46146	0.147485	0.605455	0.295085	1.6709	0.0983281	0.300708	0.00454207	1.53819	0.127624	0.31399
NVEC200_000069_1.1	6.30363	-0.0691792	-1.1736	0.24375	0.540017	-0.0884604	-1.52399	0.131132	0.431659	-0.0788198	-1.8908	0.0619733	0.466716	5.92027e-05	0.00906445	0.992788	0.996761	-0.0432527	-1.05669	0.293574	0.734599	-0.0192812	-0.234912	0.814828	0.920621	0.00230324	1.65451	0.10162	0.272814
NVEC200_000070_1.1	4.39472	-0.0377201	-0.398517	0.691224	0.865413	-0.0957982	-1.04627	0.29833	0.636383	-0.0667592	-0.99692	0.321563	0.745729	-0.0117837	-1.13998	0.257417	0.487641	0.0371293	0.578799	0.564218	0.880909	-0.0580782	-0.448786	0.6547	0.839036	-0.0010302	-0.471221	0.63866	0.804394
NVEC200_000071_1.1	5.28067	-0.0343345	-0.438264	0.662279	0.85079	0.0802335	1.03498	0.303541	0.6413	0.0229495	0.414256	0.679704	0.911798	0.010307	1.17975	0.241309	0.469621	-0.119104	-2.17421	0.0323992	0.3781	0.114568	1.04508	0.298875	0.569317	0.00220963	1.19463	0.235472	0.455746
NVEC200_000072_1.1	4.52949	0.0181498	0.210303	0.833922	0.93233	0.182988	2.14537	0.0347042	0.213327	0.100569	1.64787	0.10298	0.539199	0.00210178	0.218787	0.827328	0.919054	-0.111403	-1.85629	0.0667907	0.474365	0.164838	1.36664	0.175254	0.421456	-0.00357798	-1.77063	0.0801186	0.235247
NVEC200_000075_1.1	7.10903	0.3432	3.26435	0.00165805	0.0268893	-0.487326	-4.7109	1.11735e-05	0.00115434	-0.0720632	-0.969217	0.335571	0.755766	0.0128347	1.10712	0.271802	0.502412	0.00884442	0.121192	0.903865	0.982111	-0.830526	-5.67781	2.47988e-07	1.3313e-05	0.00658844	2.66189	0.00951278	0.0576109
NVEC200_000076_1.1	3.20724	0.156314	0.947583	0.345962	0.63804	0.0416698	0.265527	0.791231	0.931037	0.0989917	0.847602	0.398981	0.792944	-0.0104241	-0.591381	0.555796	0.749977	0.112854	1.03283	0.304539	0.744185	-0.114644	-0.517277	0.606273	0.811488	0.00146123	0.398177	0.691474	0.836546
NVEC200_000077_1.1	2.69786	0.187055	0.866612	0.388534	0.673238	0.447797	2.22775	0.0284724	0.190239	0.317426	2.07447	0.0409851	0.419369	-0.000364998	-0.0164289	0.98693	0.994611	0.303665	2.21561	0.0293241	0.366372	0.260743	0.919951	0.360137	0.630092	0.00453059	0.998338	0.320879	0.551136
NVEC200_000078_1.1	6.39974	0.134805	1.84787	0.0680131	0.273665	0.14101	1.98216	0.0506109	0.263343	0.137907	2.67257	0.0089837	0.291182	-0.0169405	-2.12114	0.0367493	0.142478	0.128578	2.57553	0.0116936	0.259498	0.00620467	0.0616936	0.950948	0.982268	-0.0121643	-7.16341	2.37772e-10	7.69255e-08
NVEC200_000079_1.1	1.42888	0.543676	2.32273	0.0225234	0.146486	-0.549698	-2.35546	0.0207442	0.160496	-0.00301087	-0.0181913	0.985528	0.996306	0.00125941	0.0482845	0.9616	0.98308	-0.323439	-1.97219	0.0517583	0.440503	-1.09337	-3.31289	0.00134569	0.0149179	-0.0077271	-1.39712	0.165925	0.369611
NVEC200_000080_1.1	7.65198	-0.0205577	-0.360373	0.71944	0.880165	0.165071	2.93339	0.00428354	0.0683375	0.0722569	1.79115	0.0767405	0.497319	-8.16629e-05	-0.0129394	0.989706	0.995383	0.0443775	1.11925	0.266108	0.71893	0.185629	2.33276	0.021964	0.111722	-0.00274559	-2.03807	0.0445746	0.162284
NVEC200_000081_1.1	5.4067	0.0311366	0.408057	0.684233	0.861161	-0.120252	-1.60587	0.111919	0.398717	-0.0445578	-0.825678	0.411241	0.801489	-0.0152406	-1.80512	0.0745087	0.224304	-0.0546398	-1.03773	0.302268	0.742028	-0.151389	-1.4298	0.156348	0.395828	-0.00223419	-1.24696	0.215753	0.431899
NVEC200_000082_1.1	3.4519	0.0518235	0.412558	0.680943	0.859367	0.0344385	0.279945	0.780183	0.927438	0.043131	0.485477	0.628556	0.894557	-0.0119008	-0.856259	0.394203	0.623562	-0.0808739	-0.937071	0.351311	0.77768	-0.0173851	-0.0999514	0.920612	0.970519	-0.00514317	-1.75962	0.0819801	0.238604
NVEC200_000083_1.1	6.13305	0.0542815	0.967897	0.335774	0.62707	-0.023279	-0.419595	0.675814	0.879321	0.0155013	0.390871	0.696846	0.916456	-0.0330664	-5.29397	8.84227e-07	4.43702e-05	-0.109179	-2.79903	0.00630976	0.20362	-0.0775605	-0.988593	0.325599	0.596115	0.00666575	5.02328	2.67393e-06	0.000111058
NVEC200_000084_1.1	5.44784	-0.0688393	-0.769498	0.443678	0.715389	-0.1177	-1.34015	0.183681	0.505296	-0.0932697	-1.47419	0.144034	0.59481	-0.0364189	-3.67071	0.000416171	0.00570391	-0.0360635	-0.585424	0.559776	0.880867	-0.0488607	-0.393457	0.694943	0.861687	-0.0061735	-2.9263	0.0043733	0.033168
NVEC200_000085_1.1	5.05319	0.20881	2.6451	0.00968621	0.0873677	0.0247158	0.317879	0.751337	0.914469	0.116763	2.09152	0.0393915	0.416589	-0.0182939	-2.09022	0.0395111	0.149554	-0.0940152	-1.7217	0.0886711	0.517184	-0.184094	-1.67442	0.0976332	0.299178	0.000781202	0.423826	0.672737	0.823604
NVEC200_000086_1.1	5.09296	-0.00940885	-0.155839	0.87652	0.949255	-0.00459285	-0.0776147	0.938312	0.98288	-0.00700085	-0.163952	0.870148	0.974902	-0.00706912	-1.05901	0.292519	0.52551	-0.047387	-1.13867	0.257961	0.712555	0.004816	0.0575604	0.954231	0.98351	-0.004243	-2.99991	0.00352041	0.0284924
NVEC200_000087_1.1	5.67475	0.239962	3.43293	0.000915543	0.0174967	-0.0208759	-0.304401	0.761548	0.91821	0.109543	2.21586	0.0293059	0.398606	-0.0258292	-3.35087	0.00119245	0.0127536	-0.0317959	-0.660611	0.510604	0.858619	-0.260837	-2.6899	0.00856461	0.0573566	0.00479567	2.9431	0.00416331	0.0321304
NVEC200_000088_1.1	3.96162	-0.181245	-1.8767	0.0639046	0.265151	-0.082161	-0.884585	0.378814	0.706269	-0.131703	-1.92712	0.0572221	0.457695	0.0019652	0.187389	0.851791	0.932883	0.0748863	1.15132	0.252751	0.707238	0.0990844	0.754958	0.452309	0.709122	0.000286786	0.129095	0.89758	0.950311
NVEC200_000089_1.1	1.01632	0.858394	3.10658	0.00255457	0.0354468	-0.197067	-0.766022	0.445733	0.75399	0.330663	1.68804	0.0949791	0.529711	-0.0374242	-1.33091	0.18669	0.401322	0.161349	0.919269	0.360492	0.783764	-1.05546	-2.90969	0.00459047	0.0364098	0.0069378	1.20623	0.230994	0.449627
NVEC200_000090_1.1	2.21433	-0.156519	-0.833513	0.406834	0.687288	0.183329	0.978844	0.330366	0.664298	0.0134052	0.100956	0.919817	0.985067	0.0161084	0.76198	0.448129	0.670067	-0.126077	-0.953149	0.34315	0.771084	0.339849	1.28308	0.202866	0.459692	0.000643657	0.145343	0.884776	0.945165
NVEC200_000091_1.1	6.14627	-0.143017	-1.54164	0.12703	0.38651	0.244636	2.68126	0.00887357	0.10282	0.0508095	0.774456	0.4409	0.811272	0.00877974	0.855941	0.394537	0.623841	-0.00362038	-0.0563271	0.955219	0.993059	0.387653	3.00475	0.00352966	0.0299642	-0.000539756	-0.247683	0.805002	0.903887
NVEC200_000092_1.1	5.10161	-0.0608409	-0.818056	0.415556	0.693759	-0.00451661	-0.0611613	0.951371	0.986594	-0.0326788	-0.62138	0.535972	0.858458	-0.00854096	-1.02434	0.30851	0.541429	-0.145519	-2.79693	0.00634749	0.20362	0.0563243	0.539333	0.591032	0.800854	-0.00242933	-1.37379	0.173029	0.378038
NVEC200_000094_1.1	4.81898	0.0928543	1.03809	0.302099	0.596976	-0.0198343	-0.225879	0.821825	0.942891	0.03651	0.577147	0.565328	0.870945	-0.01587	-1.60245	0.112675	0.293378	-0.0661574	-1.07303	0.286218	0.731784	-0.112689	-0.907613	0.366585	0.636093	-0.00264572	-1.26564	0.209016	0.423683
NVEC200_000095_1.1	4.62633	0.0875867	1.10689	0.271385	0.570326	0.0857327	1.10831	0.270776	0.608842	0.0866597	1.54842	0.125145	0.572922	-0.0113284	-1.3	0.197029	0.413499	-0.0218441	-0.402407	0.688369	0.922378	-0.00185409	-0.0169531	0.986513	0.995245	0.00203269	1.10898	0.270489	0.497969
NVEC200_000097_1.1	2.82269	0.799816	4.55948	1.66374e-05	0.000828096	-0.480609	-2.80995	0.00611694	0.0837435	0.159603	1.2863	0.201743	0.649104	0.000236692	0.0125968	0.989978	0.995566	-0.139826	-1.18042	0.241046	0.698426	-1.28042	-5.29532	8.79309e-07	3.91675e-05	-0.00157708	-0.399708	0.690349	0.835926
NVEC200_000098_1.1	4.92727	-0.146291	-1.85834	0.0664965	0.270253	0.128393	1.6849	0.0955843	0.365737	-0.00894916	-0.160684	0.872714	0.975469	0.0389088	4.53233	1.84634e-05	0.000496692	0.0918157	1.70437	0.0918737	0.521466	0.274685	2.55034	0.0125083	0.0747219	-0.000952588	-0.525466	0.600593	0.777722
NVEC200_000099_1.1	4.78953	-0.0170079	-0.205297	0.837819	0.934169	0.0645352	0.787078	0.433371	0.745551	0.0237636	0.405634	0.686005	0.91446	0.0218424	2.36176	0.0204161	0.0955811	-0.122965	-2.1162	0.037179	0.399308	0.0815431	0.703262	0.483766	0.731001	0.00329053	1.68492	0.0955814	0.26206
NVEC200_000100_1.1	2.28143	-0.0526368	-0.28965	0.772772	0.904923	-0.0244069	-0.137468	0.890978	0.9667	-0.0385218	-0.299701	0.765118	0.94139	0.0172627	0.859023	0.392684	0.622201	-0.0517041	-0.411174	0.681954	0.920898	0.02823	0.112463	0.910715	0.966195	0.00404828	0.960508	0.339456	0.568411
NVEC200_000101_1.1	2.00203	0.0261752	0.134945	0.892967	0.95696	-0.025921	-0.133731	0.893923	0.967679	0.000127099	0.000926663	0.999263	0.999588	-0.0691554	-3.12272	0.00243194	0.0213712	-0.199147	-1.48103	0.142203	0.597047	-0.0520962	-0.190052	0.84971	0.939171	-0.000113163	-0.0244938	0.980515	0.992217
NVEC200_000102_1.1	4.4731	-0.167415	-1.42258	0.158427	0.434172	-0.0715408	-0.637789	0.525283	0.800064	-0.119478	-1.43412	0.155117	0.607886	-0.00701146	-0.554739	0.580494	0.767067	0.160583	2.05163	0.0432066	0.422139	0.0958738	0.605147	0.546654	0.771326	-0.0104648	-3.89482	0.000192153	0.00318803
NVEC200_000103_1.1	6.9782	-0.0668035	-1.26828	0.208076	0.499918	0.0160512	0.3083	0.75859	0.917179	-0.0253761	-0.681281	0.497499	0.841895	-0.00830986	-1.42115	0.15884	0.36278	-0.0631951	-1.72226	0.0885698	0.51717	0.0828547	1.12538	0.263519	0.532628	0.00411621	3.2989	0.00140667	0.0145324
NVEC200_000104_1.1	3.96047	-0.0691936	-0.648442	0.518404	0.764271	0.0419406	0.404332	0.686959	0.8851	-0.0136265	-0.180522	0.857162	0.970845	0.0374727	3.1991	0.00192275	0.0177713	-0.0093415	-0.126924	0.899293	0.980681	0.111134	0.757916	0.450546	0.708319	-0.000781489	-0.317114	0.751915	0.874587
NVEC200_000105_1.1	3.54442	-0.0140431	-0.118785	0.905719	0.962379	-0.0414095	-0.369083	0.712961	0.899129	-0.0277263	-0.331214	0.741278	0.930875	0.0062849	0.497965	0.619762	0.793632	0.151697	1.93414	0.0563396	0.453002	-0.0273664	-0.172739	0.863257	0.944684	0.00534133	2.01688	0.0467857	0.16779
NVEC200_000106_1.1	3.90764	-0.081432	-0.786113	0.433933	0.708846	-0.159521	-1.58103	0.117492	0.40896	-0.120477	-1.64421	0.103735	0.540396	-0.00965528	-0.845742	0.400012	0.628386	-0.0430101	-0.607249	0.545265	0.876643	-0.0780893	-0.547467	0.585457	0.796724	-0.00272648	-1.12622	0.263163	0.488646
NVEC200_000107_1.1	3.12215	0.239866	1.80337	0.074785	0.289054	0.0397221	0.309962	0.75733	0.917179	0.139794	1.48532	0.141068	0.591971	-0.00195163	-0.13552	0.892513	0.952694	0.0244348	0.272536	0.785855	0.948674	-0.200144	-1.10517	0.272129	0.541614	-0.00171715	-0.57148	0.569145	0.755157
NVEC200_000109_1.1	7.61429	0.010612	0.194698	0.846082	0.938068	0.079022	1.4693	0.145353	0.452909	0.044817	1.16274	0.248108	0.687773	-0.000311436	-0.0516223	0.958948	0.981787	0.0251831	0.66445	0.508157	0.858421	0.0684099	0.899509	0.37086	0.63946	-0.00474204	-3.68171	0.000400942	0.00563335
NVEC200_000110_1.1	5.04218	-0.162473	-2.16731	0.0329386	0.183035	0.299089	4.08728	9.68125e-05	0.00548485	0.0683076	1.28823	0.201073	0.647945	-0.0154827	-1.87995	0.0634548	0.203685	0.0160759	0.314634	0.753791	0.938913	0.461562	4.46152	2.41866e-05	0.000646413	-0.0070553	-4.05781	0.000107663	0.00200547
NVEC200_000111_1.1	4.40093	-0.072256	-0.685318	0.494962	0.750789	0.416207	4.07621	0.00010076	0.00560285	0.171976	2.30556	0.0235094	0.373506	0.0389536	3.40115	0.00101469	0.01132	0.11124	1.5481	0.12522	0.574375	0.488463	3.38456	0.00107039	0.0124611	-0.00194059	-0.810306	0.419971	0.640871
NVEC200_000112_1.1	3.76548	-0.192639	-0.746619	0.457701	0.724028	-0.222907	-0.903866	0.369052	0.69931	-0.207773	-1.13766	0.258996	0.700725	-0.0267089	-0.958244	0.341116	0.574994	0.107074	0.623936	0.534622	0.870664	-0.0302676	-0.0868821	0.931004	0.973693	0.00263275	0.445406	0.65735	0.814675
NVEC200_000114_1.1	5.15249	0.104416	1.24856	0.21517	0.508809	-0.134397	-1.64249	0.104092	0.383606	-0.0149908	-0.253442	0.800524	0.956457	0.00261514	0.283726	0.777293	0.889927	-0.0459704	-0.797189	0.427507	0.823289	-0.238813	-2.06425	0.0419666	0.174894	0.00219937	1.12686	0.262894	0.488286
NVEC200_000115_1.1	5.89224	-0.00213668	-0.0353664	0.971868	0.98977	0.00864921	0.14588	0.884353	0.964808	0.00325627	0.0762097	0.939427	0.988727	0.00117391	0.175965	0.860729	0.936941	-0.0127656	-0.305564	0.760665	0.941596	0.0107859	0.128659	0.897924	0.960337	0.000380141	0.268337	0.789074	0.895658
NVEC200_000116_1.1	1.74387	0.390463	1.39967	0.165162	0.444311	0.377959	1.44674	0.151556	0.462403	0.384211	1.94353	0.055179	0.453009	-0.0481573	-1.6676	0.0989847	0.269507	0.224683	1.26975	0.207552	0.664836	-0.0125041	-0.0339282	0.973012	0.988957	-0.000975975	-0.166607	0.868065	0.936879
NVEC200_000118_1.1	7.78019	0.115029	2.45916	0.0159022	0.117985	0.0576237	1.24891	0.215042	0.544148	0.0863266	2.60974	0.010664	0.306315	-0.0102995	-1.99109	0.0496026	0.173144	0.0452569	1.39259	0.167286	0.627258	-0.0574057	-0.879855	0.381357	0.650535	-0.00159822	-1.44743	0.151365	0.347958
NVEC200_000119_1.1	3.7441	-0.101311	-0.775375	0.440217	0.712518	0.1256	0.982133	0.328753	0.663382	0.0121446	0.131417	0.895748	0.979727	-0.0348414	-2.40788	0.0181536	0.0885507	-0.0769399	-0.865252	0.389276	0.801366	0.226912	1.25495	0.212852	0.474262	-0.00172021	-0.567712	0.57169	0.7572
NVEC200_000120_1.1	5.33287	-0.0987981	-1.02832	0.306646	0.600999	0.0332729	0.356595	0.722257	0.904494	-0.0327626	-0.482042	0.630984	0.894557	0.0153376	1.45968	0.147974	0.348038	0.0648847	0.986981	0.326384	0.759049	0.132071	1.00132	0.319442	0.589143	-0.00229755	-1.03128	0.305264	0.534611
NVEC200_000121_1.1	4.37758	0.0153601	0.141339	0.887928	0.955549	0.142287	1.35582	0.178659	0.497019	0.0788235	1.02512	0.308143	0.737777	0.00812414	0.688224	0.493139	0.704933	0.0522009	0.70868	0.480414	0.846171	0.126927	0.855776	0.394468	0.662874	-0.00364403	-1.46898	0.145439	0.339348
NVEC200_000122_1.1	5.0059	-0.224179	-2.85506	0.00537654	0.0595488	0.140757	1.85339	0.0672102	0.304789	-0.0417112	-0.750839	0.454772	0.817225	0.0419239	4.89945	4.3947e-06	0.000162736	0.0908105	1.69218	0.0941842	0.52481	0.364936	3.39982	0.00101904	0.0120346	-0.0037806	-2.08897	0.0396258	0.149941
NVEC200_000126_1.1	1.7897	0.115986	0.55694	0.578996	0.802503	0.102426	0.495259	0.621664	0.853552	0.109206	0.741572	0.46034	0.821754	-0.0180138	-0.771534	0.442477	0.664851	-0.18957	-1.31213	0.19292	0.652118	-0.0135602	-0.0463643	0.963126	0.985546	-0.00849809	-1.73309	0.0866159	0.247699
NVEC200_000127_1.1	5.7849	0.227892	3.24626	0.00166008	0.0268893	0.135802	1.99212	0.049487	0.260108	0.181847	3.66174	0.000428993	0.103413	-0.0080844	-1.0572	0.293343	0.526323	0.101869	2.13067	0.0359326	0.394602	-0.0920898	-0.955665	0.341884	0.612076	-0.00676171	-4.18346	6.82341e-05	0.00140045
NVEC200_000128_1.1	7.44631	0.471412	8.13444	2.60685e-12	1.45676e-09	-0.298093	-5.21939	1.20265e-06	0.000212835	0.0866594	2.11452	0.0373264	0.411193	-0.0313133	-4.89268	4.51491e-06	0.00016569	-0.00848552	-0.211188	0.833234	0.965153	-0.769504	-9.52823	3.65694e-15	1.72917e-12	-0.00191631	-1.40464	0.163681	0.366071
NVEC200_000129_1.1	5.16609	0.0412894	0.480624	0.631988	0.832415	-0.202965	-2.42013	0.0175912	0.146323	-0.0808376	-1.33036	0.18687	0.634557	0.0110819	1.17224	0.244295	0.472968	-0.0152666	-0.258121	0.796922	0.952032	-0.244254	-2.06005	0.0423759	0.175877	-0.0011724	-0.583821	0.560849	0.749768
NVEC200_000130_1.1	7.07922	-0.00245945	-0.0544477	0.956703	0.983503	0.123028	2.76578	0.00693137	0.0902693	0.0602843	1.88716	0.0624664	0.468309	-0.00374137	-0.749504	0.455572	0.676425	0.0338851	1.08167	0.282384	0.728722	0.125487	1.99504	0.049162	0.193792	-0.000614392	-0.577366	0.565181	0.752798
NVEC200_000132_1.1	6.01595	0.00985518	0.176344	0.860433	0.943721	-0.0239639	-0.433902	0.665432	0.873105	-0.00705438	-0.1785	0.858744	0.970968	0.00717358	1.15398	0.251664	0.48155	-0.101479	-2.60187	0.0108933	0.252208	-0.0338191	-0.433024	0.666067	0.846458	0.00106433	0.805546	0.422697	0.642736
NVEC200_000133_1.1	5.84603	0.0327191	0.555971	0.579655	0.802871	-0.0131591	-0.228754	0.819596	0.941766	0.00978004	0.23496	0.814791	0.962543	0.00653945	1.01086	0.31488	0.547931	0.0235862	0.581938	0.56211	0.880909	-0.0458782	-0.564098	0.574136	0.790172	0.00240222	1.74939	0.0837431	0.242179
NVEC200_000134_1.1	1.63589	0.285059	1.52051	0.132003	0.393704	0.151115	0.829054	0.409338	0.72849	0.218087	1.64447	0.103681	0.540396	0.107669	5.18715	1.37284e-06	6.34501e-05	0.0422716	0.316121	0.752666	0.938913	-0.133944	-0.519833	0.604498	0.809641	0.000483441	0.112657	0.910562	0.956951
NVEC200_000135_1.1	2.90982	0.400857	2.44265	0.0165983	0.120674	-0.492185	-3.06765	0.00287417	0.0538644	-0.045664	-0.393414	0.694975	0.916171	-0.0024224	-0.134525	0.893297	0.953068	-0.0953669	-0.848747	0.398347	0.806047	-0.893043	-3.93686	0.000165706	0.00294817	0.00118338	0.310856	0.756652	0.877573
NVEC200_000136_1.1	5.86208	-0.212688	-3.76341	0.000303333	0.00773689	0.203157	3.66863	0.000419112	0.015022	-0.00476564	-0.11923	0.905368	0.981546	0.0259274	4.16064	7.41698e-05	0.00151721	0.0167599	0.428903	0.669052	0.916879	0.415845	5.31108	8.2377e-07	3.73706e-05	-0.00144007	-1.08832	0.279454	0.50826
NVEC200_000137_1.1	6.19304	0.309242	4.97422	3.25802e-06	0.000233321	-0.0497248	-0.81602	0.416713	0.733859	0.129759	2.95115	0.00406615	0.227674	-0.00586639	-0.858065	0.39321	0.622553	-0.00226273	-0.0527555	0.958047	0.993314	-0.358967	-4.16637	7.26343e-05	0.00150638	0.0010388	0.716795	0.475417	0.687378
NVEC200_000138_1.1	3.67128	-0.238161	-2.10078	0.038548	0.201588	0.287603	2.60066	0.010929	0.115035	0.024721	0.308289	0.758598	0.938533	0.023378	1.87769	0.0637678	0.204067	-0.008171	-0.104908	0.91669	0.984261	0.525764	3.36284	0.00114765	0.0131371	0.00363164	1.39095	0.16778	0.372057
NVEC200_000139_1.1	2.76018	-0.691074	-0.702206	0.484808	0.74382	-0.202819	-0.227524	0.82066	0.942211	-0.446947	-0.639089	0.524787	0.853753	-0.0864049	-0.872047	0.386073	0.616093	0.356708	0.596604	0.552638	0.879562	0.488256	0.389672	0.697926	0.862959	-0.0112143	-0.533847	0.595087	0.773964
NVEC200_000140_1.1	0.600291	-0.045891	-0.0508165	0.959612	0.985175	0.91194	0.940051	0.350324	0.683416	0.433025	0.676376	0.500962	0.844022	-0.00748847	-0.0700964	0.944311	0.974184	-0.600376	-0.908333	0.366723	0.787922	0.957831	0.699732	0.486342	0.732015	0.00717347	0.322629	0.747909	0.872288
NVEC200_000142_1.1	4.42811	-0.248824	-2.63855	0.00986114	0.0880413	0.2731	2.9925	0.00359874	0.0617918	0.0121381	0.18193	0.85606	0.970845	0.0136005	1.3259	0.188337	0.403108	0.0630896	0.98647	0.326633	0.759049	0.521925	4.04626	0.000112226	0.0021762	0.00920899	4.2659	5.03692e-05	0.0011099
NVEC200_000143_1.1	2.06252	-0.593281	-1.00011	0.320592	0.6137	-0.253076	-0.47783	0.634213	0.858691	-0.423178	-1.0023	0.319544	0.744958	-0.0787927	-1.35831	0.178591	0.390257	0.600619	1.72995	0.0879062	0.51717	0.340205	0.457987	0.648335	0.835715	0.00463247	0.382694	0.70307	0.842972
NVEC200_000144_1.1	3.59743	0.159807	1.05094	0.29619	0.592509	0.084947	0.592082	0.555328	0.814605	0.122377	1.13622	0.25898	0.700725	0.0471111	2.92957	0.00433172	0.0321583	0.206525	2.0375	0.0446325	0.425358	-0.0748602	-0.369658	0.712534	0.869814	-0.000300808	-0.0898493	0.928613	0.966097
NVEC200_000145_1.1	3.17257	0.284191	2.06363	0.042027	0.211736	-0.142467	-1.04393	0.299407	0.637386	0.0708623	0.727667	0.468767	0.827164	-0.029445	-1.90949	0.0594885	0.195758	-0.156753	-1.64021	0.104565	0.547628	-0.426658	-2.21075	0.0296715	0.137136	-0.000998094	-0.308628	0.758341	0.878603
NVEC200_000146_1.1	3.324	0.215084	1.91262	0.0590809	0.254946	-0.399614	-3.55534	0.000612645	0.0196654	-0.0922648	-1.1603	0.249095	0.688947	-0.0441889	-3.47181	0.000806646	0.00948079	-0.239363	-3.04745	0.00305436	0.145218	-0.614698	-3.86712	0.000211729	0.00361226	-0.00186381	-0.692268	0.490609	0.698531
NVEC200_000147_1.1	5.46063	0.0619144	0.953284	0.343082	0.634786	0.00496638	0.0778859	0.938097	0.98288	0.0334404	0.72802	0.468553	0.827164	0.00419075	0.583844	0.560833	0.753587	-0.0447458	-0.99525	0.32237	0.757553	-0.056948	-0.631625	0.529285	0.760256	-3.02536e-06	-0.0019906	0.998416	0.99918
NVEC200_000148_1.1	3.41246	-0.0332425	-0.284879	0.776413	0.906468	0.171502	1.4971	0.13798	0.442211	0.0691297	0.837669	0.404507	0.797067	0.00477602	0.369706	0.712498	0.855416	-0.0585634	-0.727437	0.468908	0.840837	0.204744	1.26402	0.209591	0.469945	-0.00303584	-1.12019	0.26571	0.491836
NVEC200_000149_1.1	4.81686	-0.114133	-1.30663	0.194775	0.48473	-0.150232	-1.7691	0.0803756	0.335691	-0.132183	-2.13923	0.0352126	0.405445	0.0292547	3.05136	0.00301867	0.0249741	0.0289137	0.480627	0.631986	0.905024	-0.0360994	-0.300715	0.764348	0.896533	0.00347158	1.70531	0.0916981	0.256187
NVEC200_000150_1.1	4.715	-0.124336	-1.57753	0.118296	0.373606	-0.0831976	-1.07978	0.283221	0.621771	-0.103767	-1.86141	0.0660561	0.473822	0.0180707	2.07688	0.0407565	0.152483	-0.045141	-0.828784	0.40949	0.812577	0.0411385	0.377635	0.70662	0.866826	0.00383558	2.0787	0.0405845	0.15249
NVEC200_000151_1.1	6.19665	0.0346595	0.639589	0.524117	0.767266	0.0364747	0.685325	0.494957	0.785592	0.0355671	0.928051	0.355944	0.769064	-0.0239126	-3.99403	0.000135284	0.00239998	-0.0133382	-0.356723	0.722161	0.931482	0.00181524	0.0241211	0.980811	0.992436	-0.000380785	-0.299395	0.765352	0.882537
NVEC200_000152_1.1	0.853596	-0.242393	-0.764775	0.446471	0.717096	-0.129352	-0.447623	0.655536	0.867667	-0.185873	-0.825799	0.411173	0.801489	-0.0305557	-0.951353	0.344056	0.578298	0.444381	2.26994	0.0256776	0.345006	0.113041	0.278054	0.78163	0.905945	-0.00200994	-0.299841	0.765012	0.882358
NVEC200_000153_1.1	4.01758	-0.0296222	-0.345282	0.730714	0.885675	0.0589475	0.69626	0.488118	0.781262	0.0146626	0.241683	0.809594	0.960637	-0.00326397	-0.341372	0.733645	0.865447	-0.123222	-2.06893	0.041515	0.415429	0.0885697	0.739802	0.461408	0.717143	0.00103665	0.514981	0.60787	0.782529
NVEC200_000155_1.1	4.37677	-0.231672	-1.99996	0.0486176	0.230063	0.0156292	0.138417	0.89023	0.966475	-0.108021	-1.31835	0.19084	0.636992	0.00806168	0.632217	0.5289	0.730595	0.00214816	0.0270355	0.978493	0.997936	0.247301	1.54923	0.124951	0.348886	0.00398795	1.47677	0.14334	0.336045
NVEC200_000157_1.1	5.98053	0.398751	6.11012	2.71499e-08	4.39185e-06	-0.363796	-5.71251	1.51951e-07	3.89183e-05	0.0174776	0.37863	0.705883	0.920367	-0.0262931	-3.67938	0.000404125	0.00557611	0.00556629	0.124603	0.901125	0.981173	-0.762547	-8.46949	5.398e-13	1.58007e-10	-0.00134097	-0.884169	0.379037	0.604456
NVEC200_000158_1.1	6.97352	0.0935452	1.70681	0.0914176	0.325293	-0.0330605	-0.609752	0.543613	0.809784	0.0302423	0.780313	0.437321	0.811272	-0.00666162	-1.09404	0.276953	0.508567	-0.0897542	-2.34791	0.0211428	0.322894	-0.126606	-1.65123	0.10229	0.308982	-0.00578505	-4.45651	2.46509e-05	0.000667529
NVEC200_000159_1.1	3.35149	-0.251339	-1.07179	0.287239	0.584829	-0.1768	-0.795491	0.428829	0.742404	-0.214069	-1.28912	0.201305	0.648205	-0.00173622	-0.0693018	0.944933	0.974581	0.116865	0.753483	0.45351	0.833651	0.0745395	0.237534	0.812888	0.920233	-0.000362373	-0.0681518	0.945846	0.975032
NVEC200_000160_1.1	0.660228	-0.324697	-1.01755	0.311708	0.604608	-0.164009	-0.532491	0.595741	0.839893	-0.244353	-1.08227	0.282115	0.718221	0.0593036	1.69816	0.0930457	0.258416	-0.0149845	-0.0679508	0.94598	0.99023	0.160688	0.369152	0.71291	0.869912	0.0115607	1.5635	0.121558	0.305487
NVEC200_000162_1.1	2.42663	0.205604	1.20663	0.230839	0.52691	-0.0853113	-0.514585	0.608145	0.846626	0.0601465	0.499004	0.619034	0.890588	-0.0198308	-1.05895	0.292548	0.52551	0.00540872	0.0466469	0.962901	0.99495	-0.290916	-1.2413	0.217826	0.480523	0.00439334	1.1244	0.26393	0.48948
NVEC200_000163_1.1	4.00686	0.00753192	0.0597361	0.952503	0.981976	-0.187212	-1.56382	0.121484	0.413604	-0.0898403	-1.00631	0.317052	0.744161	0.0183974	1.36624	0.175379	0.386123	0.186444	2.21561	0.0293241	0.366372	-0.194744	-1.152	0.252471	0.521955	0.00445647	1.56788	0.120533	0.304403
NVEC200_000164_1.1	5.87865	-0.062749	-0.843049	0.401508	0.682636	0.255197	3.5073	0.00071804	0.0217428	0.0962242	1.82782	0.0709975	0.482958	-0.0031376	-0.38364	0.70218	0.84933	0.0584605	1.14449	0.255553	0.709379	0.317946	3.09067	0.00268097	0.0244328	-0.00520215	-3.00131	0.00350572	0.0284109
NVEC200_000165_1.1	2.24596	0.455299	2.28808	0.0245522	0.154475	-0.275053	-1.41724	0.159976	0.474532	0.0901229	0.640309	0.523651	0.85291	-0.00721912	-0.333203	0.739781	0.86922	-0.100277	-0.739439	0.461627	0.837427	-0.730352	-2.66188	0.00925151	0.0605311	-0.00647248	-1.42517	0.15768	0.357066
NVEC200_000166_1.1	4.34913	-0.0396232	-0.432732	0.666278	0.852269	0.0808334	0.884629	0.37879	0.706269	0.0206051	0.318243	0.751062	0.934488	-0.00161873	-0.156958	0.875641	0.943529	-0.186814	-2.89259	0.00482434	0.183709	0.120457	0.932152	0.353833	0.624644	0.0126035	5.78912	1.09419e-07	9.27723e-06
NVEC200_000167_1.1	4.76141	-0.238628	-1.37918	0.172022	0.453439	-0.112316	-0.671114	0.504251	0.789983	-0.175472	-1.43344	0.155972	0.608735	-0.0112431	-0.595103	0.553602	0.748512	0.0504214	0.430029	0.668433	0.916619	0.126313	0.534006	0.594949	0.803391	0.0036381	0.906019	0.367886	0.595176
NVEC200_000168_1.1	3.97438	0.178355	1.77746	0.0789801	0.297573	-0.0104074	-0.10646	0.915462	0.974376	0.0839738	1.18311	0.239982	0.68161	-0.00942905	-0.856434	0.394106	0.62349	-0.0532977	-0.777109	0.439198	0.82675	-0.188763	-1.36584	0.175502	0.421658	0.00110654	0.47951	0.632776	0.799769
NVEC200_000169_1.1	3.04641	-0.417401	-3.03506	0.00316993	0.0409198	0.275098	2.10669	0.0380182	0.224488	-0.0711519	-0.730685	0.466931	0.82599	0.0453864	3.10147	0.00259452	0.0223212	0.157895	1.72915	0.0873219	0.516683	0.692499	3.75551	0.000311685	0.0048382	0.00310356	1.01511	0.312864	0.542463
NVEC200_000170_1.1	3.41719	-0.184402	-1.39059	0.16789	0.44751	0.2099	1.64058	0.104487	0.384371	0.0127491	0.135877	0.892231	0.979558	0.0159301	1.10554	0.271967	0.502504	0.0577106	0.643184	0.521793	0.865827	0.394303	2.18072	0.0318977	0.144608	-0.00851316	-2.80724	0.00616423	0.0425031
NVEC200_000171_1.1	10.1946	0.0632991	1.6309	0.10652	0.353839	0.0296715	0.773131	0.441536	0.751484	0.0464853	1.69368	0.0938961	0.528508	-0.00827557	-1.92405	0.0576106	0.191524	0.00357875	0.13234	0.89502	0.979985	-0.0336276	-0.619616	0.537127	0.765616	0.000990284	1.07771	0.284136	0.512645
NVEC200_000172_1.1	2.39719	0.00456564	0.0196442	0.984372	0.993571	0.267829	1.20726	0.2306	0.563282	0.136197	0.827838	0.410026	0.801036	-0.0232214	-0.932003	0.353912	0.58706	0.0527283	0.343442	0.732094	0.934423	0.263263	0.840115	0.403145	0.669766	0.00884323	1.7245	0.0881663	0.249808
NVEC200_000173_1.1	5.13267	0.0112439	0.132148	0.895172	0.95781	0.0936041	1.13373	0.260016	0.596595	0.052424	0.870951	0.386173	0.785179	-0.030122	-3.23834	0.00170167	0.016344	0.0639572	1.10885	0.270544	0.721266	0.0823602	0.705711	0.482249	0.729875	0.00358815	1.82809	0.0709571	0.217543
NVEC200_000175_1.1	6.55351	0.0748355	1.07068	0.287269	0.584829	-0.036442	-0.529683	0.597679	0.840838	0.0191967	0.388365	0.698693	0.917503	-0.018826	-2.4357	0.0168992	0.0846956	-0.0140251	-0.28972	0.772719	0.944299	-0.111278	-1.14383	0.255825	0.524974	0.00705085	4.28367	4.71583e-05	0.00106784
NVEC200_000176_1.1	1.87926	-0.118396	-0.536392	0.593054	0.812098	0.0257811	0.121403	0.903651	0.971364	-0.0463076	-0.296474	0.767574	0.942618	-0.00430364	-0.17931	0.85811	0.935807	0.0883955	0.594412	0.553777	0.879717	0.144178	0.480464	0.632101	0.826971	0.00462925	0.920958	0.359614	0.587831
NVEC200_000177_1.1	4.12763	-0.369991	-3.57763	0.000568892	0.0122875	0.057146	0.575465	0.566459	0.821967	-0.156423	-2.13727	0.0353764	0.405445	0.0345748	3.08892	0.00269519	0.0229147	0.098634	1.41243	0.161383	0.624232	0.427137	3.04421	0.00308414	0.0271413	-0.00395444	-1.66812	0.0988807	0.268235
NVEC200_000178_1.1	4.06765	-0.0869586	-0.732014	0.466124	0.730189	0.284898	2.43363	0.0169897	0.143554	0.0989696	1.17809	0.241969	0.682749	-0.0202749	-1.53802	0.127666	0.316246	-0.0653612	-0.799669	0.426077	0.822579	0.371856	2.24633	0.02721	0.129911	0.0022562	0.817847	0.415674	0.636956
NVEC200_000179_1.1	1.42822	-0.00585797	-0.0266961	0.978763	0.99229	0.703263	3.17065	0.0020995	0.0450459	0.348703	2.24722	0.0271511	0.389039	0.0832508	3.37603	0.00110014	0.0120399	-0.148653	-0.947935	0.345783	0.773117	0.709121	2.26079	0.0262622	0.12707	-0.00994538	-1.95314	0.0540113	0.183328
NVEC200_000180_1.1	3.56455	-0.30281	-2.3874	0.0191291	0.131971	0.392549	3.15436	0.00220745	0.0465381	0.0448695	0.5002	0.618195	0.890406	0.0381529	2.73214	0.00761671	0.048045	-0.017985	-0.205439	0.837708	0.966024	0.695358	3.95178	0.00015719	0.00282415	0.00411763	1.41012	0.162061	0.363308
NVEC200_000181_1.1	2.35033	-0.144013	-0.761751	0.448265	0.718228	-0.182175	-1.03053	0.305614	0.64197	-0.163094	-1.21726	0.226792	0.672986	0.0125129	0.629894	0.530411	0.731549	0.144289	1.16999	0.245194	0.703243	-0.0381625	-0.153046	0.878716	0.951381	-0.00246085	-0.588046	0.558022	0.747964
NVEC200_000183_1.1	4.96871	-0.118763	-1.55351	0.123925	0.381258	-0.0206278	-0.275072	0.783912	0.928907	-0.0696956	-1.28905	0.20079	0.647854	0.0115926	1.36999	0.174208	0.38451	-0.046589	-0.880076	0.381238	0.797426	0.0981357	0.925527	0.357247	0.627338	0.0039734	2.21525	0.0293496	0.123343
NVEC200_000184_1.1	1.64368	-0.563123	-2.21755	0.029186	0.172093	0.210461	0.864264	0.389815	0.71389	-0.176331	-0.981144	0.329237	0.750184	-0.0191518	-0.703011	0.483922	0.69785	0.0311412	0.186287	0.852652	0.96977	0.773584	2.24846	0.0270691	0.129614	-0.00540515	-0.943504	0.348031	0.576255
NVEC200_000185_1.1	3.38325	-0.044379	-0.370245	0.712098	0.874921	-0.0138831	-0.118387	0.906034	0.972145	-0.029131	-0.34362	0.73196	0.927798	0.0132593	0.999784	0.320182	0.553331	-0.0634333	-0.766369	0.445527	0.829864	0.0304959	0.18393	0.854496	0.941569	-0.000288059	-0.103066	0.918147	0.960819
NVEC200_000187_1.1	4.19079	-0.188337	-2.05639	0.0427358	0.213488	0.0161017	0.180121	0.857476	0.956181	-0.0861176	-1.32938	0.187192	0.634677	-0.0219659	-2.17269	0.0325171	0.131329	-0.0149123	-0.238397	0.812133	0.959297	0.204439	1.61761	0.10936	0.323035	0.00318103	1.48898	0.140101	0.331485
NVEC200_000188_1.1	6.20228	-0.0707267	-1.0529	0.295296	0.591926	0.261177	3.97224	0.00014619	0.00745752	0.0952254	2.00435	0.0481371	0.438368	-0.0168263	-2.27658	0.0252607	0.110243	0.0677586	1.46911	0.145404	0.602087	0.331904	3.57027	0.000583005	0.00779919	-0.00769677	-4.90244	4.34259e-06	0.000162768
NVEC200_000189_1.1	4.91917	-0.233895	-2.40277	0.0183925	0.128549	0.170311	1.7895	0.0770067	0.327698	-0.0317921	-0.461759	0.645405	0.898631	0.0585847	5.45279	4.56321e-07	2.55e-05	-0.0130043	-0.191878	0.848284	0.969346	0.404206	3.00396	0.00347829	0.0297165	0.00290975	1.28256	0.203046	0.416111
NVEC200_000190_1.1	3.17641	-0.257243	-1.74211	0.0850171	0.311378	0.0950875	0.680992	0.497681	0.787522	-0.0810775	-0.775294	0.440264	0.811272	0.0149023	0.950461	0.344506	0.57871	0.147688	1.52154	0.131743	0.584079	0.35233	1.78738	0.0773513	0.260465	-0.00285446	-0.866597	0.388542	0.612864
NVEC200_000191_1.1	5.79764	-0.0247117	-0.414971	0.679183	0.858334	0.0870201	1.49146	0.139451	0.443803	0.0311542	0.739699	0.46147	0.822458	0.00183062	0.278922	0.780965	0.892387	0.00774044	0.188425	0.850981	0.969531	0.111732	1.3544	0.179108	0.427646	0.00223337	1.60439	0.112246	0.290077
NVEC200_000192_1.1	4.90459	-0.309031	-2.91294	0.00454718	0.0533935	-0.0513403	-0.500333	0.618102	0.851772	-0.180186	-2.40062	0.0184941	0.345542	0.0222065	1.9191	0.0582431	0.192999	0.0634129	0.877219	0.382779	0.797426	0.257691	1.77682	0.0790867	0.264085	0.00501836	2.04037	0.0443399	0.161803
NVEC200_000193_1.1	3.46149	0.130255	1.14577	0.255027	0.552768	-0.0216844	-0.19515	0.84573	0.951759	0.0542852	0.675128	0.501381	0.84428	-0.00166232	-0.132571	0.894838	0.953812	-0.0706457	-0.904011	0.368481	0.78853	-0.151939	-0.967151	0.336145	0.606659	0.00563967	2.14667	0.0345971	0.137765
NVEC200_000194_1.1	5.6129	-0.0705606	-0.973647	0.332926	0.624664	0.0904468	1.28462	0.202329	0.530375	0.0099431	0.193952	0.846665	0.968043	0.0181408	2.29066	0.024396	0.107848	0.0936742	1.88921	0.0621888	0.463217	0.161007	1.61772	0.109336	0.323035	-0.0015824	-0.942445	0.34857	0.576526
NVEC200_000196_1.1	1.012	0.234622	0.738657	0.4621	0.727594	0.167809	0.534992	0.594018	0.839203	0.201216	0.895809	0.372822	0.777049	-0.0570481	-1.60801	0.11145	0.291338	-0.0934088	-0.429679	0.668489	0.916619	-0.0668136	-0.150632	0.880614	0.952262	-0.00202093	-0.273641	0.785008	0.893074
NVEC200_000197_1.1	2.59142	-0.179954	-1.12928	0.26188	0.560019	0.193805	1.23849	0.218858	0.549197	0.00692531	0.0614499	0.951142	0.991437	0.0107554	0.609559	0.54374	0.742254	-0.0771882	-0.702829	0.484035	0.847466	0.373758	1.6892	0.0947556	0.293802	-0.00141384	-0.382909	0.702719	0.842885
NVEC200_000199_1.1	5.21473	-0.0794937	-1.1241	0.264056	0.56227	-0.0580462	-0.842331	0.401908	0.722376	-0.06877	-1.3748	0.172716	0.62468	0.0210436	2.70924	0.00811805	0.0503549	0.0244541	0.502314	0.616713	0.901209	0.0214474	0.220152	0.826268	0.926245	0.00284537	1.72695	0.087719	0.248942
NVEC200_000200_1.1	6.02041	-0.0254367	-0.390762	0.696927	0.868263	0.0216394	0.338302	0.735949	0.908064	-0.00189868	-0.041243	0.967196	0.994538	-0.00904569	-1.25648	0.2123	0.432766	-0.0117698	-0.261491	0.794331	0.951179	0.0470761	0.520492	0.60404	0.809205	-0.000975764	-0.637814	0.525267	0.724888
NVEC200_000202_1.1	2.40952	-0.000564679	-0.00341964	0.997279	0.998498	0.0377162	0.230797	0.818013	0.941147	0.0185758	0.159081	0.873973	0.975469	-0.00576826	-0.311881	0.755876	0.877087	-0.191235	-1.66541	0.0994222	0.537995	0.0382809	0.165651	0.868815	0.947678	-0.00911612	-2.33602	0.0217853	0.101612
NVEC200_000203_1.1	6.68728	-0.182665	-2.88502	0.00493131	0.0559792	0.0745731	1.19531	0.235208	0.56895	-0.0540462	-1.20705	0.230678	0.678595	0.0247635	3.53002	0.000666211	0.00822329	-0.0228279	-0.51803	0.60575	0.897564	0.257239	2.91587	0.0045086	0.0359693	-0.00407031	-2.72012	0.00787633	0.0506972
NVEC200_000207_1.1	6.74254	0.0282077	0.573475	0.5678	0.795683	0.0104432	0.216215	0.829326	0.945625	0.0193255	0.555546	0.579944	0.877039	-0.0206524	-3.80646	0.000261468	0.00399811	0.047963	1.4123	0.161423	0.624232	-0.0177644	-0.260112	0.795391	0.912092	-0.00233239	-2.01762	0.046707	0.167654
NVEC200_000208_1.1	5.42764	0.0271966	0.33864	0.735695	0.887861	0.045337	0.579982	0.563423	0.819948	0.0362668	0.638394	0.524891	0.853753	-0.0206078	-2.33987	0.0215751	0.0994171	0.0482218	0.880444	0.38104	0.797426	0.0181404	0.164157	0.869987	0.947773	-0.0100391	-5.37538	6.30624e-07	3.62285e-05
NVEC200_000209_1.1	4.78537	-0.146066	-1.60567	0.111963	0.362804	0.169161	1.90561	0.0599972	0.287395	0.0115478	0.17947	0.857986	0.970845	0.0462724	4.62193	1.30774e-05	0.000382795	0.0119295	0.189091	0.850461	0.969365	0.315227	2.51176	0.0138557	0.0803123	0.00548605	2.59956	0.0109614	0.0634461
NVEC200_000210_1.1	7.47769	-0.051608	-1.00684	0.316799	0.609956	-0.00621092	-0.122494	0.90279	0.971109	-0.0289094	-0.797576	0.427284	0.809097	-0.0229461	-4.03215	0.000118055	0.00218909	-0.0580989	-1.62707	0.107331	0.55204	0.045397	0.633135	0.528303	0.760215	0.00463846	3.81618	0.00025281	0.00394923
NVEC200_000211_1.1	6.23753	-0.00959431	-0.128712	0.897882	0.959102	0.0376392	0.516633	0.606721	0.846426	0.0140224	0.265968	0.790892	0.952231	-0.00984582	-1.20176	0.232712	0.459591	0.0653097	1.27536	0.205569	0.661839	0.0472335	0.45856	0.647691	0.835279	-0.00687802	-3.94523	0.000160876	0.00275461
NVEC200_000212_1.1	6.02603	-0.429756	-5.7097	1.53786e-07	1.80061e-05	-0.277684	-3.72119	0.000350544	0.013386	-0.35372	-6.64583	2.50637e-09	5.13556e-06	-0.0171555	-2.03718	0.0446656	0.161934	-0.14985	-2.85354	0.00540019	0.190814	0.152073	1.44106	0.153149	0.391032	0.00113871	0.630916	0.529746	0.727757
NVEC200_000213_1.1	4.80557	0.182714	2.4396	0.0167297	0.121028	-0.174604	-2.3957	0.0187284	0.151987	0.00405494	0.0765394	0.939165	0.98862	-0.0102699	-1.25152	0.214093	0.435567	-0.0152402	-0.29767	0.766663	0.942948	-0.357318	-3.46807	0.000816572	0.0101199	-0.000222302	-0.128188	0.898296	0.950443
NVEC200_000214_1.1	9.1928	0.145155	1.81521	0.0733294	0.285977	0.0495255	0.628186	0.531714	0.803157	0.0973403	1.7213	0.0891531	0.518933	-0.0179158	-2.02857	0.0459097	0.164841	0.152533	2.74848	0.00743278	0.217051	-0.0956297	-0.857792	0.393631	0.662283	0.00219471	1.1636	0.248125	0.471247
NVEC200_000215_1.1	7.09456	0.15175	2.67097	0.00902332	0.0836871	-0.078922	-1.41027	0.162018	0.476633	0.0364141	0.906307	0.367272	0.77408	-0.00986157	-1.57026	0.119979	0.304693	0.00614241	0.155841	0.876519	0.976126	-0.230672	-2.91498	0.0045202	0.0360151	-0.00574933	-4.2931	4.55353e-05	0.00104638
NVEC200_000216_1.1	4.15804	-0.298853	-3.23743	0.00170653	0.0273891	-0.0686533	-0.768734	0.444129	0.752912	-0.183753	-2.81355	0.00605463	0.270675	0.0264358	2.62009	0.0103689	0.0599245	0.0121267	0.1925	0.847799	0.969346	0.2302	1.82373	0.0716205	0.248772	-0.00153485	-0.716659	0.4755	0.687418
NVEC200_000218_1.1	3.77645	0.131602	1.11535	0.267768	0.566375	0.0437017	0.377617	0.706633	0.895774	0.0876516	1.05037	0.296452	0.728478	0.0148487	1.13835	0.258093	0.488332	-0.0686795	-0.840484	0.402937	0.809296	-0.0878998	-0.53717	0.592519	0.801773	-0.000682643	-0.249351	0.803676	0.903728
NVEC200_000219_1.1	4.59249	-0.247324	-2.46005	0.0158655	0.117784	0.128232	1.30862	0.194103	0.520459	-0.0595461	-0.83734	0.404691	0.797067	0.00191952	0.173749	0.862466	0.937367	0.00848907	0.123414	0.902063	0.981326	0.375557	2.71098	0.00807889	0.055026	0.00342334	1.46562	0.14635	0.34044
NVEC200_000220_1.1	1.87218	0.14807	0.701085	0.485117	0.744109	-0.0991513	-0.483108	0.63023	0.85737	0.0244591	0.163713	0.870336	0.974911	0.00450406	0.19478	0.846018	0.929486	-0.0381667	-0.265088	0.791567	0.950159	-0.247221	-0.852128	0.396478	0.664799	0.00153522	0.318408	0.750937	0.874244
NVEC200_000221_1.1	2.08638	-0.176465	-0.922279	0.358929	0.649591	0.0949116	0.516208	0.607016	0.84649	-0.0407767	-0.301152	0.764016	0.94101	0.0549874	2.64657	0.00964758	0.0568315	0.0619107	0.474117	0.636602	0.906987	0.271377	1.04457	0.29911	0.569507	0.00175273	0.40353	0.687547	0.833764
NVEC200_000222_1.1	5.03643	0.0865187	1.00757	0.316449	0.609956	-0.0893057	-1.07183	0.286754	0.624619	-0.00139352	-0.0229402	0.98175	0.995845	0.00471025	0.502108	0.616858	0.792109	0.0310427	0.529486	0.597814	0.895008	-0.175824	-1.49287	0.139083	0.37123	0.00248022	1.24988	0.21469	0.430578
NVEC200_000223_1.1	4.50392	-0.163356	-1.90919	0.059528	0.255887	-0.00589064	-0.0708225	0.943701	0.984165	-0.0846233	-1.39812	0.165625	0.61759	0.0349626	3.72043	0.000351458	0.00498365	0.0150605	0.255243	0.799137	0.95317	0.157465	1.33926	0.183969	0.433861	0.000515825	0.259354	0.795974	0.899504
NVEC200_000224_1.1	5.15962	0.403519	5.58392	2.62608e-07	2.75941e-05	-0.12684	-1.80678	0.0742478	0.321296	0.13834	2.70617	0.00818758	0.284523	-0.0174712	-2.21763	0.0291804	0.121661	0.00600725	0.12212	0.903085	0.981743	-0.530359	-5.34437	7.17463e-07	3.31597e-05	-0.00572787	-3.44661	0.000875747	0.0102245
NVEC200_000225_1.1	7.78139	-0.0533895	-1.28366	0.202663	0.494519	0.0444417	1.07451	0.28556	0.623491	-0.00447391	-0.152121	0.879443	0.97705	-0.00714079	-1.53881	0.127473	0.316136	-0.201136	-6.89171	8.23315e-10	1.01218e-05	0.0978313	1.67259	0.0979944	0.299911	0.00563465	5.68407	1.71566e-07	1.29267e-05
NVEC200_000226_1.1	5.96483	0.16632	2.7517	0.00721106	0.0717256	-0.136378	-2.29609	0.0240694	0.172945	0.0149709	0.350231	0.727011	0.925778	0.00047838	0.0716313	0.943059	0.973384	-0.0479104	-1.14401	0.255751	0.709439	-0.302698	-3.60419	0.000520608	0.00716725	1.49076e-06	0.00105125	0.999164	0.999489
NVEC200_000227_1.1	7.98442	0.0953828	1.83418	0.07004	0.278961	0.0118362	0.230354	0.818356	0.941195	0.0536095	1.45779	0.148491	0.597755	-0.0079148	-1.37394	0.172983	0.382699	0.0090293	0.249358	0.80367	0.955359	-0.0835465	-1.14982	0.253365	0.523007	-0.00293992	-2.38923	0.0190399	0.0929983
NVEC200_000228_1.1	0.991664	-0.115721	-0.393719	0.69475	0.867023	0.0937189	0.324551	0.746299	0.912209	-0.0110009	-0.0529239	0.957914	0.9928	0.0356042	1.09167	0.277989	0.509889	-0.108406	-0.529063	0.598107	0.895198	0.20944	0.512944	0.609288	0.81331	-0.00210602	-0.307914	0.758882	0.87896
NVEC200_000229_1.1	5.31807	-0.0452339	-0.56975	0.570313	0.797025	0.0551327	0.71021	0.479469	0.777036	0.0049494	0.0881411	0.929967	0.987808	0.00554191	0.633907	0.527802	0.730525	0.0167791	0.306816	0.759715	0.941596	0.100367	0.914464	0.362996	0.633092	0.00456295	2.46385	0.0157094	0.0818004
NVEC200_000230_1.1	5.78111	0.138131	1.98921	0.0498134	0.233208	0.0944762	1.39268	0.16726	0.483128	0.116304	2.36799	0.0200968	0.354986	0.0189108	2.48236	0.0149682	0.0779378	0.0257711	0.538381	0.591686	0.891217	-0.0436551	-0.455168	0.65012	0.836831	0.00292781	1.81668	0.0727027	0.220884
NVEC200_000231_1.1	4.15294	0.116432	1.16244	0.248229	0.545193	0.128437	1.29424	0.199	0.526017	0.122434	1.72862	0.0874171	0.51709	0.0129192	1.15614	0.250782	0.480385	-0.132984	-1.89572	0.0613111	0.462818	0.0120057	0.0855495	0.932021	0.974232	0.000194987	0.0831829	0.933897	0.968643
NVEC200_000232_1.1	5.02871	0.188202	2.49178	0.0146035	0.11193	-0.243634	-3.31797	0.00132417	0.0325604	-0.0277157	-0.518743	0.605254	0.884895	0.000107976	0.0130672	0.989604	0.995383	0.00265724	0.0514296	0.959101	0.993519	-0.431836	-4.16028	7.42698e-05	0.00153344	-0.00347385	-1.98336	0.0504753	0.175592
NVEC200_000233_1.1	3.82453	0.55926	4.16765	7.22957e-05	0.0025688	-0.532284	-4.0917	9.52793e-05	0.00542298	0.0134879	0.142078	0.887346	0.978389	0.0243376	1.67707	0.097111	0.266017	-0.03883	-0.423058	0.673295	0.918395	-1.09154	-5.93621	5.79744e-08	3.93778e-06	0.0095216	3.11001	0.00252802	0.0226362
NVEC200_000234_1.1	4.16514	-0.00845621	-0.0688614	0.945258	0.979073	0.0485095	0.390138	0.697386	0.890614	0.0200266	0.230616	0.818154	0.963155	0.0217321	1.54977	0.12482	0.3119	-0.285067	-3.22505	0.00177376	0.110259	0.0569657	0.323983	0.746727	0.888355	0.00409615	1.385	0.169586	0.374308
NVEC200_000235_1.1	5.31809	-0.22898	-2.75399	0.00716489	0.0713818	-0.0436464	-0.539267	0.591077	0.837371	-0.136313	-2.31772	0.0228073	0.371524	0.0144439	1.58289	0.117069	0.300694	0.0259682	0.455226	0.650078	0.910591	0.185333	1.6198	0.108889	0.322495	0.00102245	0.526651	0.599774	0.77707
NVEC200_000236_1.1	3.63762	-0.185485	-1.73197	0.0868155	0.315213	-0.0285366	-0.27187	0.786365	0.929406	-0.107011	-1.41282	0.161269	0.61092	-0.00503107	-0.423488	0.672982	0.831645	-0.0727609	-0.986844	0.32645	0.759049	0.156948	1.05753	0.293192	0.563468	0.00180848	0.719636	0.473674	0.685746
NVEC200_000237_1.1	5.25076	-0.26076	-3.47115	0.000808394	0.015968	0.102365	1.40993	0.162119	0.476702	-0.0791976	-1.49007	0.139816	0.590891	0.0795899	9.69637	1.65521e-15	1.01746e-12	0.124414	2.40249	0.0184058	0.30595	0.363126	3.53881	0.000647134	0.00844385	-0.0053514	-3.08053	0.00276457	0.0241047
NVEC200_000238_1.1	2.70924	0.471755	2.82511	0.00585834	0.0630669	-0.049923	-0.309377	0.757773	0.917179	0.210916	1.78521	0.0777062	0.50002	0.00131791	0.0730937	0.941899	0.973384	-0.0195785	-0.173247	0.862859	0.971644	-0.521679	-2.28743	0.0245919	0.12103	-0.00587543	-1.5605	0.122265	0.306378
NVEC200_000239_1.1	0.648871	0.0690166	0.237782	0.812608	0.923309	-0.278136	-0.95413	0.342656	0.67626	-0.10456	-0.509451	0.611724	0.887403	-0.144553	-4.27782	4.81921e-05	0.00109207	-0.263467	-1.30368	0.195776	0.654225	-0.347153	-0.842093	0.402041	0.669113	0.00650123	0.926861	0.356558	0.584862
NVEC200_000240_1.1	1.36127	0.76246	3.10965	0.00253079	0.0352762	0.381988	1.63823	0.104979	0.385373	0.572224	3.29629	0.00141831	0.170777	0.035654	1.39535	0.166454	0.373837	0.115518	0.712194	0.478247	0.845742	-0.380471	-1.15542	0.251074	0.520086	0.0118253	2.28757	0.0245834	0.109782
NVEC200_000242_1.1	7.20904	0.147539	2.55738	0.0122758	0.100128	-0.160051	-2.81853	0.00596935	0.0824575	-0.00625609	-0.153338	0.878486	0.977031	-0.00543277	-0.852841	0.396085	0.624931	0.0328526	0.821294	0.413719	0.815741	-0.30759	-3.83069	0.000240393	0.00398839	-0.00135653	-0.997888	0.321096	0.551334
NVEC200_000243_1.1	5.08267	0.284918	3.19521	0.00194606	0.0302464	0.138947	1.59359	0.114648	0.404443	0.211932	3.36034	0.00115687	0.168809	-0.0117316	-1.19797	0.234174	0.461463	-0.0242206	-0.396038	0.693045	0.923453	-0.14597	-1.18411	0.23959	0.507411	-0.00906294	-4.39557	3.10358e-05	0.000789968
NVEC200_000246_1.1	2.67803	0.198465	1.21182	0.228855	0.524914	-0.151352	-0.941999	0.348796	0.68195	0.0235564	0.203376	0.839315	0.967061	-0.00669393	-0.368741	0.713215	0.856025	-0.125816	-1.11489	0.267961	0.720697	-0.349817	-1.53982	0.127226	0.352358	-0.000998732	-0.261418	0.794387	0.898536
NVEC200_000247_1.1	5.21485	0.0351815	0.513305	0.609037	0.821239	-0.0690721	-1.02661	0.307445	0.644177	-0.0169453	-0.349583	0.727495	0.925778	-0.0186051	-2.45102	0.0162419	0.0822335	-0.0605873	-1.28166	0.20336	0.66053	-0.104254	-1.09586	0.276157	0.545657	-0.00240382	-1.49435	0.138695	0.329771
NVEC200_000249_1.1	3.83166	-0.0789582	-0.793644	0.429558	0.705518	0.00590437	0.0603362	0.952026	0.986708	-0.0365269	-0.519155	0.604968	0.884782	-0.0106987	-0.966502	0.336467	0.570094	-0.0912325	-1.3269	0.188007	0.650212	0.0848625	0.613291	0.541281	0.768064	-0.0046959	-2.00641	0.0479122	0.17037
NVEC200_000250_1.1	2.0761	-0.00533468	-0.0259518	0.979355	0.992351	0.133371	0.705889	0.482139	0.777806	0.0640181	0.438856	0.661852	0.904391	-0.0222273	-1.05752	0.293197	0.526214	0.406249	3.14817	0.00224978	0.123084	0.138706	0.521326	0.603462	0.808606	-0.0145527	-3.3189	0.00132029	0.0138024
NVEC200_000251_1.1	7.79124	-0.147448	-2.16514	0.0331091	0.183608	-0.186617	-2.76922	0.00686447	0.0897785	-0.167032	-3.46848	0.000815466	0.140509	0.00176014	0.232747	0.816504	0.912706	-0.0607632	-1.27814	0.204594	0.66122	-0.0391689	-0.411016	0.68207	0.854067	0.00551339	3.40641	0.000997608	0.0112313
NVEC200_000252_1.1	4.9251	-0.200229	-2.38075	0.0194559	0.133106	0.0974444	1.19954	0.233569	0.566523	-0.0513925	-0.863652	0.390149	0.78799	-0.0133444	-1.45767	0.148525	0.349009	0.0964522	1.69959	0.0927738	0.522714	0.297674	2.59277	0.011164	0.06929	-0.00178713	-0.921927	0.359111	0.587402
NVEC200_000254_1.1	4.57078	0.344283	4.14102	7.96698e-05	0.00276684	-0.10069	-1.24931	0.214896	0.543944	0.121796	2.07077	0.0413382	0.419455	-0.00438359	-0.484652	0.629139	0.800307	0.0179894	0.318039	0.751216	0.938266	-0.444973	-3.90594	0.000184792	0.00323162	0.00240044	1.26327	0.209861	0.424828
NVEC200_000255_1.1	4.4018	0.00273696	0.0272002	0.978362	0.99229	-0.138378	-1.40691	0.163009	0.477887	-0.0678205	-0.952942	0.343254	0.759702	0.0249164	2.24278	0.0274476	0.11656	-0.0445597	-0.638585	0.524767	0.866857	-0.141115	-1.01479	0.313015	0.583327	0.000903335	0.384328	0.701672	0.842582
NVEC200_000256_1.1	2.23085	0.172763	0.979316	0.330134	0.622209	0.0226268	0.131733	0.895499	0.968297	0.0976949	0.782895	0.43581	0.811272	-0.0444267	-2.28067	0.0250067	0.109485	-0.0553516	-0.462787	0.64467	0.909521	-0.150136	-0.618309	0.537984	0.765949	0.00552997	1.36518	0.17571	0.381359
NVEC200_000257_1.1	5.71928	0.0548569	0.771621	0.442426	0.714366	-0.0119735	-0.172541	0.863412	0.958232	0.0214417	0.426403	0.670866	0.908228	0.00506185	0.648343	0.518467	0.725064	0.0394404	0.807115	0.421797	0.820551	-0.0668304	-0.681183	0.497561	0.740739	-0.00530022	-3.19914	0.00192252	0.0184422
NVEC200_000258_1.1	2.4415	0.268841	1.61848	0.109172	0.358452	-0.0832972	-0.512745	0.609426	0.846892	0.0927717	0.789653	0.431873	0.810487	0.00104398	0.0571338	0.954569	0.979425	-0.130972	-1.14899	0.253703	0.708214	-0.352138	-1.53314	0.128864	0.355347	-0.00395288	-1.03489	0.303583	0.532713
NVEC200_000259_1.1	7.91446	0.0896944	1.55422	0.123754	0.381154	-0.0176853	-0.308425	0.758495	0.917179	0.0360045	0.882291	0.380046	0.780642	-0.018758	-2.91624	0.00450372	0.0331748	-0.185096	-4.5774	1.553e-05	0.00954629	-0.10738	-1.3242	0.1889	0.440471	-0.00168544	-1.22711	0.223084	0.440647
NVEC200_000260_1.1	2.25667	0.228008	1.45031	0.150562	0.421929	-0.032318	-0.193016	0.847396	0.95271	0.0978452	0.878415	0.382134	0.781878	-0.0369324	-1.96967	0.0520515	0.17853	-0.522263	-4.4821	2.23666e-05	0.00982053	-0.260326	-1.10133	0.273785	0.54324	0.00351902	0.891337	0.375202	0.601635
NVEC200_000261_1.1	4.31852	-0.107603	-1.25391	0.213227	0.506369	0.0568717	0.674398	0.501843	0.789318	-0.0253659	-0.417964	0.677001	0.91027	-0.0116828	-1.22626	0.223405	0.447392	-0.0797932	-1.34884	0.180882	0.643931	0.164475	1.37935	0.171316	0.416538	-0.000948054	-0.471418	0.63852	0.8043
NVEC200_000262_1.1	4.35187	0.137255	1.24657	0.215895	0.509203	-0.0645644	-0.599104	0.550658	0.812407	0.0363451	0.466713	0.641869	0.89751	0.00222061	0.182761	0.85541	0.934626	-0.0752552	-0.992138	0.323876	0.757848	-0.201819	-1.32453	0.188791	0.440423	-0.00260837	-1.01794	0.311521	0.540938
NVEC200_000263_1.1	5.40898	-0.101423	-1.3655	0.17561	0.459186	-0.0127623	-0.178043	0.859103	0.956384	-0.0570928	-1.08636	0.280314	0.718086	-0.0191826	-2.37672	0.0196562	0.0932517	0.122583	2.44645	0.0164357	0.296276	0.088661	0.875206	0.383867	0.652824	-0.00302956	-1.76875	0.0804342	0.235836
NVEC200_000264_1.1	4.29471	-0.130225	-1.29752	0.197875	0.48875	-0.0346514	-0.355679	0.72294	0.904862	-0.0824381	-1.16111	0.248768	0.688819	0.00665932	0.605401	0.546486	0.743947	-0.00428506	-0.0625105	0.950299	0.991514	0.0955734	0.694007	0.489523	0.734687	0.000289925	0.124638	0.901097	0.951947
NVEC200_000265_1.1	6.97054	0.0507489	0.61674	0.539117	0.776557	-0.198659	-2.43856	0.0169086	0.143484	-0.0739552	-1.27097	0.207337	0.6527	0.00444374	0.485622	0.628532	0.80008	-0.110195	-1.91594	0.058863	0.45836	-0.249408	-2.16493	0.0333044	0.148511	-0.000498883	-0.255431	0.799031	0.900842
NVEC200_000266_1.1	-0.551356	0.199198	0.360637	0.719243	0.880033	0.784006	1.42145	0.158755	0.472805	0.491602	1.25868	0.211507	0.656484	0.00468014	0.0763876	0.939286	0.972264	-0.114962	-0.297389	0.766877	0.942948	0.584808	0.749738	0.455431	0.711625	0.0229689	1.8273	0.0710772	0.217857
NVEC200_000267_1.1	3.33477	-0.203505	-0.751828	0.454561	0.722013	-0.374962	-1.46515	0.147156	0.455229	-0.289234	-1.50877	0.135656	0.586109	-0.00502288	-0.174276	0.862129	0.937367	0.140441	0.787735	0.433392	0.824576	-0.171457	-0.474573	0.636502	0.830607	0.00148159	0.241697	0.80969	0.905531
NVEC200_000268_1.1	7.25006	0.0215418	0.370369	0.712006	0.874903	-0.0345835	-0.60129	0.549207	0.811859	-0.00652084	-0.158542	0.874397	0.975469	0.0110878	1.71723	0.0894874	0.252031	-0.0651758	-1.60567	0.111964	0.557677	-0.0561253	-0.69006	0.49199	0.736546	-0.00590306	-4.28363	4.71643e-05	0.00106784
NVEC200_000269_1.1	2.85849	-0.210857	-1.24676	0.215825	0.509182	-0.133739	-0.820919	0.413932	0.731184	-0.172298	-1.43975	0.15352	0.605159	0.0406786	2.20235	0.0302802	0.124822	0.00330382	0.0285376	0.977299	0.997669	0.077118	0.334973	0.73845	0.884241	-0.00647325	-1.65219	0.102093	0.273808
NVEC200_000270_1.1	5.33316	-0.305437	-4.12584	8.41896e-05	0.00288308	0.197678	2.76517	0.00694325	0.0903283	-0.0538796	-1.02864	0.306493	0.736667	0.0371646	4.61857	1.32485e-05	0.000385965	0.138375	2.74683	0.00731022	0.21552	0.503115	4.97967	3.18741e-06	0.000115964	-0.00507306	-2.97133	0.00383144	0.0304278
NVEC200_000272_1.1	6.0726	0.318227	4.53266	1.84401e-05	0.000905241	-0.16943	-2.45115	0.0162367	0.140976	0.0743985	1.49845	0.137629	0.589014	-0.00762189	-0.981407	0.329108	0.563126	-0.0738107	-1.51566	0.133223	0.586128	-0.487657	-4.98922	3.06737e-06	0.000113585	-0.007155	-4.34072	3.81286e-05	0.000913749
NVEC200_000273_1.1	1.54573	0.302522	1.54975	0.124826	0.382979	-0.138829	-0.737888	0.462565	0.764351	0.0818464	0.592547	0.555019	0.86613	0.00878531	0.414883	0.679247	0.836384	0.0290454	0.219281	0.826944	0.963102	-0.441351	-1.65996	0.100516	0.305321	0.00292445	0.660986	0.510365	0.71357
NVEC200_000274_1.1	4.128	0.205322	1.49881	0.137563	0.403051	-0.00195951	-0.0150691	0.988012	0.996373	0.101681	1.04828	0.297431	0.729579	-0.0224192	-1.53559	0.128288	0.317146	0.130418	1.44062	0.153301	0.614296	-0.207282	-1.12887	0.262074	0.531586	-0.0137779	-4.47062	2.35366e-05	0.000642679
NVEC200_000275_1.1	4.63866	0.0383525	0.401611	0.688954	0.864311	0.000787621	0.00841748	0.993303	0.997231	0.01957	0.289753	0.772693	0.944565	0.0037403	0.354258	0.724001	0.861402	-0.0713537	-1.08254	0.281999	0.728034	-0.0375649	-0.283939	0.77713	0.904139	-0.00661427	-2.96113	0.00394846	0.0310175
NVEC200_000276_1.1	2.32021	0.160862	0.941565	0.349018	0.640708	-0.0588454	-0.357889	0.721291	0.903899	0.0510082	0.421923	0.67412	0.909646	-0.0249582	-1.34265	0.182871	0.396021	0.00710081	0.0619721	0.950727	0.991514	-0.219707	-0.945606	0.346963	0.617572	0.000884526	0.227913	0.820248	0.911271
NVEC200_000277_1.1	4.4051	-0.201581	-1.67935	0.09667	0.334828	0.280114	2.38578	0.019211	0.153309	0.0392664	0.46251	0.644869	0.898563	-0.0125719	-0.951291	0.34409	0.578298	0.00292165	0.0356155	0.97167	0.996972	0.481695	2.90178	0.00469866	0.0370528	0.00486233	1.75058	0.0835415	0.241781
NVEC200_000278_1.1	9.19912	-0.0167837	-0.206092	0.83726	0.93393	-0.0291459	-0.362339	0.718085	0.902303	-0.0229648	-0.398765	0.691163	0.916171	-0.0242319	-2.68808	0.008793	0.0532781	0.0767529	1.35521	0.179289	0.642605	-0.0123621	-0.10868	0.913737	0.967566	0.00556922	2.89032	0.00498991	0.036585
NVEC200_000279_1.1	5.14337	-0.0571193	-0.705629	0.4823	0.741797	0.150782	1.89404	0.0615365	0.291235	0.0468314	0.81806	0.415554	0.803783	-0.0182465	-2.03353	0.0450401	0.162812	-0.0500315	-0.896052	0.372693	0.791844	0.207901	1.8469	0.0681545	0.240843	0.00336481	1.77559	0.0792902	0.233707
NVEC200_000280_1.1	3.9255	0.41	2.86807	0.00519257	0.0580823	-0.206018	-1.49035	0.139786	0.444293	0.101991	1.00841	0.316083	0.743292	-0.0234522	-1.51335	0.133852	0.326704	-0.0310325	-0.321773	0.748404	0.938266	-0.616018	-3.153	0.00222472	0.0216211	-2.65652e-05	-0.00817839	0.993494	0.996715
NVEC200_000281_1.1	4.69305	-0.0553186	-0.670281	0.504451	0.755886	-0.00992561	-0.12286	0.902501	0.970976	-0.0326221	-0.558874	0.577681	0.876466	0.0294018	3.22245	0.00178817	0.0168352	-0.0332546	-0.580979	0.562754	0.880909	0.045393	0.397404	0.692041	0.859997	-0.00352511	-1.82454	0.0714967	0.218543
NVEC200_000283_1.1	3.5819	0.191036	1.56771	0.120573	0.376321	0.18588	1.57004	0.120029	0.412191	0.188458	2.18624	0.0314778	0.398606	0.0203754	1.53337	0.128805	0.318009	-0.0317745	-0.38131	0.703901	0.926329	-0.00515618	-0.0308093	0.975492	0.99056	-0.00325615	-1.17632	0.24267	0.464485
NVEC200_000284_1.1	2.57804	-0.0427414	-0.260002	0.795475	0.915105	0.0811245	0.494206	0.622404	0.854189	0.0191916	0.165102	0.869246	0.974385	-0.0192337	-1.03516	0.303459	0.536284	-0.190313	-1.65462	0.101599	0.542563	0.123866	0.533573	0.594995	0.803391	-0.000832169	-0.213369	0.831537	0.917335
NVEC200_000285_1.1	3.14255	-0.012358	-0.0851107	0.932369	0.974291	-0.00286522	-0.0204569	0.983726	0.994423	-0.00761164	-0.0740875	0.941111	0.989217	-0.0335611	-2.11676	0.0371301	0.143501	0.0606906	0.622968	0.534932	0.870967	0.00949283	0.0479586	0.961859	0.985396	-0.00411627	-1.23908	0.218643	0.43488
NVEC200_000286_1.1	4.71238	0.0502365	0.57902	0.564069	0.792272	0.241175	2.83105	0.00575972	0.080884	0.145706	2.37462	0.0197617	0.351969	-0.0238071	-2.48222	0.0149739	0.0779378	-0.0416212	-0.697794	0.487163	0.849168	0.190938	1.58515	0.116555	0.335579	0.00886662	4.40232	3.02568e-05	0.000773342
NVEC200_000287_1.1	5.19329	-0.223226	-2.54883	0.0125587	0.101577	0.293769	3.47694	0.000793224	0.0234927	0.0352714	0.569186	0.570694	0.873934	0.0386746	4.07269	0.000102046	0.00194953	0.150071	2.52333	0.0134386	0.275199	0.516995	4.32977	3.97214e-05	0.000965088	-0.00459053	-2.28806	0.0245536	0.109728
NVEC200_000288_1.1	5.58656	-0.135387	-1.74645	0.0842556	0.309575	0.100206	1.33489	0.185389	0.507949	-0.0175904	-0.320735	0.749179	0.934213	0.00836061	0.989851	0.324987	0.559186	0.132005	2.50435	0.0141287	0.279324	0.235593	2.22044	0.0289824	0.135247	-0.00676392	-3.77008	0.000296451	0.00443379
NVEC200_000289_1.1	4.86995	0.02124	0.250573	0.802734	0.919397	-0.0294679	-0.351218	0.726272	0.905654	-0.00411394	-0.0686325	0.945439	0.990644	-0.0223376	-2.35709	0.0206588	0.0964023	-0.12531	-2.12476	0.0364378	0.396462	-0.0507079	-0.427378	0.670158	0.847996	0.00153595	0.766383	0.445519	0.662299
NVEC200_000290_1.1	2.25514	0.269539	1.60267	0.112625	0.363702	0.19243	1.16443	0.247428	0.58071	0.230985	1.94202	0.0553642	0.453009	-0.00769077	-0.414542	0.679496	0.836543	-0.0589564	-0.509444	0.611728	0.900918	-0.0771097	-0.329992	0.742198	0.88623	0.00606747	1.58328	0.116979	0.297812
NVEC200_000294_1.1	4.07976	-0.228483	-1.98857	0.0498862	0.233372	-0.0450067	-0.39721	0.692184	0.887848	-0.136745	-1.68294	0.0959646	0.529792	-0.00308986	-0.241044	0.810087	0.907941	-0.104094	-1.3042	0.195599	0.654225	0.183476	1.14512	0.255294	0.524585	0.00528055	1.94153	0.0554237	0.186475
NVEC200_000296_1.1	7.0204	-0.0709644	-0.986378	0.326678	0.619081	0.0911997	1.28213	0.203198	0.531082	0.0101177	0.198871	0.842827	0.96758	-0.0120992	-1.51443	0.133536	0.32612	-0.0553152	-1.10386	0.272691	0.722357	0.162164	1.61215	0.110544	0.324972	-0.000843554	-0.495076	0.621792	0.792293
NVEC200_000297_1.1	10.442	0.0801069	2.21801	0.029154	0.171986	0.0190791	0.534861	0.594108	0.839203	0.049593	1.94176	0.0553962	0.453009	-0.011914	-2.98044	0.00372963	0.0289287	0.0524759	2.08847	0.0396723	0.407462	-0.0610278	-1.20985	0.229609	0.495343	0.00312172	3.65568	0.000437868	0.00601698
NVEC200_000298_1.1	3.38049	-0.0522109	-0.419776	0.675682	0.856447	-0.135266	-1.14052	0.257195	0.594129	-0.0937382	-1.06462	0.289987	0.72221	-0.0166075	-1.2407	0.218046	0.44128	0.0713601	0.863301	0.390341	0.801814	-0.0830547	-0.4958	0.621284	0.819736	-0.0051554	-1.82622	0.0712413	0.218142
NVEC200_000299_1.1	4.72594	0.284393	3.36122	0.0011536	0.0208613	-0.176024	-2.1369	0.0354078	0.216354	0.0541842	0.905337	0.367782	0.774232	-0.0363306	-3.9138	0.00017975	0.00302305	-0.00939871	-0.163157	0.870772	0.973811	-0.460417	-3.95378	0.000156083	0.00281774	-0.00294556	-1.50549	0.135813	0.326048
NVEC200_000300_1.1	3.01191	-0.249013	-1.91879	0.0582837	0.253284	0.109172	0.856715	0.393952	0.716691	-0.0699204	-0.761819	0.448225	0.814192	0.011107	0.770401	0.443145	0.665367	-0.0957258	-1.07145	0.286926	0.731784	0.358185	1.98789	0.0499625	0.196192	-0.0107782	-3.51495	0.000700185	0.00863398
NVEC200_000301_1.1	3.85355	0.190994	1.81295	0.0732823	0.285977	-0.0843023	-0.821382	0.413669	0.731184	0.0533461	0.715869	0.475986	0.83097	-0.00699572	-0.605029	0.546732	0.743947	-0.0463439	-0.642598	0.522172	0.865888	-0.275297	-1.89735	0.0610919	0.224131	0.0028458	1.17243	0.244219	0.466216
NVEC200_000302_1.1	3.28673	0.114966	0.912324	0.364115	0.655444	-0.268251	-2.21132	0.0296303	0.194353	-0.0766425	-0.85951	0.392417	0.789637	-0.0249557	-1.82065	0.0720912	0.219664	0.0129417	0.152796	0.878913	0.97617	-0.383216	-2.23553	0.0279376	0.132561	-5.16969e-06	-0.001789	0.998577	0.999227
NVEC200_000303_1.1	4.66683	-0.209139	-2.2954	0.024111	0.152794	0.0597565	0.677628	0.499802	0.788149	-0.0746914	-1.15871	0.249738	0.689795	0.0368682	3.70582	0.000369407	0.00518709	0.0783711	1.25715	0.212056	0.668636	0.268896	2.15736	0.033729	0.150023	-0.000905137	-0.429929	0.668308	0.820965
NVEC200_000304_1.1	3.33285	0.213982	1.85533	0.0669287	0.271111	0.111566	0.967428	0.336007	0.669625	0.162774	1.99593	0.0490637	0.441452	-0.00911422	-0.702704	0.484113	0.697951	-0.204042	-2.51745	0.0136492	0.275199	-0.102416	-0.627974	0.531663	0.761927	0.00468615	1.73365	0.0865161	0.247471
NVEC200_000305_1.1	6.00371	-0.24016	-4.26111	5.12695e-05	0.00199464	0.17951	3.24571	0.00166293	0.0381006	-0.0303247	-0.760777	0.448843	0.814195	0.0198654	3.19237	0.00196328	0.0180207	0.00579009	0.148406	0.882365	0.97699	0.41967	5.36653	6.54313e-07	3.07028e-05	0.0016664	1.25941	0.211245	0.426285
NVEC200_000306_1.1	4.32668	-0.362129	-3.91441	0.000179364	0.00522184	0.286788	3.28005	0.00149291	0.0358474	-0.0376708	-0.574947	0.566808	0.871527	-0.00493517	-0.504638	0.615086	0.790884	0.266277	4.41582	2.87552e-05	0.0117839	0.648917	5.25743	1.02829e-06	4.4829e-05	-0.00663896	-3.22357	0.00178193	0.0174719
NVEC200_000307_1.1	4.76497	0.128209	1.24801	0.215368	0.508985	0.150252	1.49635	0.138175	0.442259	0.13923	1.91618	0.0586197	0.461781	-0.0114508	-1.01321	0.313766	0.547309	-0.000826223	-0.0117311	0.990667	0.999586	0.0220425	0.155267	0.87697	0.950756	-0.00242815	-1.02152	0.309836	0.539307
NVEC200_000308_1.1	4.83105	-0.138698	-1.60015	0.113184	0.364477	-0.00347526	-0.0413519	0.96711	0.989766	-0.0710865	-1.15927	0.24951	0.689476	0.0182325	1.92401	0.0576168	0.191524	0.0322936	0.545426	0.586854	0.888882	0.135222	1.13832	0.258108	0.527655	-0.000439775	-0.219124	0.827066	0.915059
NVEC200_000310_1.1	4.75302	-0.0315821	-0.331269	0.741236	0.890005	0.28734	3.08627	0.00271689	0.0520272	0.127879	1.89641	0.0612185	0.465888	0.031687	3.02767	0.00324083	0.0262396	0.0151832	0.230775	0.818031	0.960874	0.318922	2.4229	0.0174661	0.0952657	0.00430387	1.959	0.0533096	0.18185
NVEC200_000311_1.1	5.86301	-0.0385799	-0.602278	0.548553	0.783146	0.00645899	0.103059	0.918153	0.974928	-0.0160605	-0.354491	0.723827	0.925281	0.0170582	2.41797	0.0176892	0.0871278	0.0122042	0.275942	0.783246	0.947286	0.0450389	0.508277	0.612543	0.815	-0.00381586	-2.54559	0.0126677	0.070437
NVEC200_000312_1.1	3.51433	-0.362503	-2.5556	0.0123342	0.100421	0.0582628	0.421331	0.674551	0.878488	-0.15212	-1.51615	0.133099	0.581908	0.00109158	0.0699168	0.94442	0.974215	-0.0346748	-0.357984	0.721221	0.931482	0.420766	2.15232	0.0341364	0.151234	0.00436237	1.32351	0.189127	0.398002
NVEC200_000314_1.1	5.49507	-0.131045	-1.84719	0.0681118	0.273828	0.176955	2.56293	0.0120951	0.120892	0.0229552	0.457436	0.648496	0.899843	-0.0171123	-2.20226	0.0302866	0.124822	0.0661638	1.36881	0.174575	0.636069	0.308	3.15557	0.00219926	0.0214836	0.00144411	0.877698	0.38252	0.607761
NVEC200_000315_1.1	6.04467	-0.0583806	-1.08858	0.279342	0.577467	-0.0023451	-0.0446765	0.964467	0.989175	-0.0303628	-0.800474	0.425612	0.809097	-0.00279751	-0.473709	0.636891	0.805481	0.0290751	0.78718	0.433312	0.824576	0.0560355	0.755042	0.452259	0.709122	0.00121523	0.967513	0.335964	0.564641
NVEC200_000316_1.1	3.31321	0.0995957	0.712541	0.478033	0.738218	-0.0683989	-0.512649	0.609493	0.846892	0.0155984	0.15765	0.875097	0.975469	0.00184652	0.122653	0.902664	0.95631	0.114778	1.22636	0.223368	0.680734	-0.167995	-0.891393	0.375172	0.644005	-0.0228786	-7.1174	2.93668e-10	9.02589e-08
NVEC200_000317_1.1	5.25087	-0.118703	-1.55015	0.12473	0.382782	0.0558765	0.746426	0.457419	0.76158	-0.0314132	-0.579998	0.563412	0.869737	0.0067612	0.801467	0.425041	0.651227	-0.0159378	-0.302356	0.763101	0.942077	0.174579	1.6495	0.102645	0.309596	0.000356404	0.199346	0.842456	0.921865
NVEC200_000318_1.1	4.86616	-0.102658	-1.25523	0.212749	0.506299	-0.0149526	-0.186485	0.852498	0.953947	-0.0588053	-1.01666	0.312127	0.74036	0.0152671	1.68624	0.0953258	0.262589	-0.0580721	-1.0257	0.307872	0.746838	0.0877054	0.773622	0.441247	0.701862	-0.00476586	-2.48089	0.0150261	0.0792494
NVEC200_000319_1.1	6.08036	0.0852189	1.23253	0.221066	0.515499	-0.0666855	-0.990341	0.324749	0.659148	0.00926673	0.189474	0.850162	0.968664	-0.0171351	-2.26316	0.0261096	0.112774	0.0863822	1.82733	0.071072	0.487043	-0.151904	-1.59577	0.11416	0.331819	-0.00514253	-3.19421	0.00195209	0.0186617
NVEC200_000320_1.1	3.14586	-0.0357117	-0.228214	0.820014	0.926245	-0.205952	-1.35271	0.179646	0.498098	-0.120832	-1.09161	0.278015	0.71605	0.0395654	2.29224	0.0243004	0.107541	-0.0284706	-0.262007	0.793934	0.950934	-0.170241	-0.79097	0.431108	0.694847	-0.00375901	-1.02849	0.306566	0.536016
NVEC200_000322_1.1	6.06532	0.227764	3.65748	0.000435208	0.010033	-0.180678	-2.96714	0.00387911	0.0644555	0.0235429	0.534518	0.594344	0.881272	-0.0240756	-3.51824	0.000692622	0.00849835	0.018819	0.440138	0.660927	0.914139	-0.408443	-4.74418	8.12172e-06	0.000258006	0.000836569	0.575867	0.566189	0.753325
NVEC200_000323_1.1	5.36424	-0.374622	-4.9178	4.08436e-06	0.000282096	0.373767	5.03565	2.54359e-06	0.000376757	-0.000427445	-0.0079328	0.993689	0.998521	-0.00413455	-0.495782	0.621296	0.794245	0.0684641	1.3202	0.190226	0.650638	0.748389	7.13217	2.74439e-10	3.66734e-08	-0.000442874	-0.250794	0.802564	0.903215
NVEC200_000324_1.1	5.36358	-0.00186955	-0.0262658	0.979105	0.99229	0.103274	1.47905	0.142731	0.448653	0.0507022	1.0072	0.316627	0.743649	0.0125053	1.5905	0.115342	0.297715	-0.0265213	-0.538604	0.591533	0.891112	0.105143	1.06499	0.289824	0.560147	-0.00381937	-2.29515	0.0241259	0.108368
NVEC200_000325_1.1	10.9305	0.0986023	2.22526	0.0286452	0.169814	0.0446399	1.01845	0.311282	0.648212	0.0716211	2.28572	0.0246962	0.379669	-0.0139356	-2.8371	0.00566085	0.0389449	-0.0138107	-0.447259	0.655797	0.912421	-0.0539625	-0.870604	0.386362	0.655254	0.00114948	1.09561	0.276269	0.504187
NVEC200_000326_1.1	4.04145	-0.0129986	-0.0995137	0.920959	0.968792	0.205247	1.62682	0.107385	0.391189	0.0961244	1.0401	0.301171	0.73193	0.00116727	0.0822976	0.934599	0.969862	0.0590954	0.669243	0.505109	0.857126	0.218246	1.22398	0.224257	0.48918	0.000843001	0.283968	0.777108	0.889136
NVEC200_000328_1.1	1.09029	-1.09559	-1.72379	0.089004	0.319324	-0.0939011	-0.151786	0.879777	0.963804	-0.594746	-1.32289	0.190025	0.636497	-0.0381655	-0.552244	0.582478	0.768181	0.0107922	0.0254924	0.979732	0.997936	1.00169	1.14537	0.25582	0.524974	0.015984	1.07311	0.286777	0.51552
NVEC200_000329_1.1	2.31705	-0.284722	-0.624515	0.534254	0.772992	-0.284705	-0.632219	0.529237	0.801483	-0.284713	-0.883104	0.380105	0.780642	0.0189451	0.370838	0.711842	0.855149	0.0130632	0.040437	0.967856	0.996239	1.69244e-05	2.65769e-05	0.999979	0.999985	0.000597709	0.0544373	0.956737	0.979524
NVEC200_000330_1.1	4.45913	-0.140895	-1.35536	0.178805	0.463272	0.177644	1.76113	0.0817224	0.338093	0.0183744	0.249855	0.803287	0.957516	0.0392986	3.45609	0.000849122	0.00986683	0.0146896	0.205903	0.837347	0.966024	0.31854	2.23409	0.0280362	0.132772	-0.00167596	-0.699653	0.486007	0.694992
NVEC200_000331_1.1	3.68308	-0.022446	-0.208051	0.835674	0.933132	0.241233	2.27779	0.0251854	0.17699	0.109393	1.43371	0.155232	0.607886	0.0339497	2.84827	0.0054825	0.0379515	-0.0527681	-0.70225	0.484394	0.847466	0.263679	1.76082	0.0817763	0.269771	0.00609175	2.45101	0.0162424	0.0835829
NVEC200_000333_1.1	6.15737	-0.0698205	-0.882725	0.379813	0.667507	0.0113399	0.145196	0.884892	0.964808	-0.0292403	-0.522762	0.602466	0.884279	-0.0164414	-1.87015	0.0648191	0.205648	-0.0884199	-1.6084	0.111363	0.557677	0.0811604	0.734866	0.464394	0.718828	0.00677033	3.61774	0.000497504	0.00665541
NVEC200_000335_1.1	4.43968	-0.220464	-2.02686	0.0457328	0.221959	0.153446	1.4646	0.146628	0.454558	-0.0335093	-0.435371	0.664369	0.904802	0.0456696	3.86848	0.000210726	0.00344046	0.117177	1.58422	0.116766	0.562812	0.37391	2.52549	0.013362	0.0781134	-0.0013689	-0.549688	0.583939	0.766081
NVEC200_000336_1.1	0.632203	0.269476	0.508598	0.612483	0.822854	0.488892	0.956942	0.341581	0.675448	0.379184	1.01142	0.314973	0.742262	0.0401282	0.705876	0.482388	0.696802	0.0284803	0.0796353	0.936733	0.989153	0.219416	0.303904	0.762018	0.895869	0.008762	0.75509	0.452491	0.668234
NVEC200_000337_1.1	5.8103	0.204762	3.63445	0.000470342	0.0106294	-0.166228	-3.03097	0.00320896	0.057467	0.0192668	0.483458	0.629983	0.894557	-0.0275416	-4.46511	2.38589e-05	0.000609815	0.0449317	1.16858	0.245761	0.703471	-0.37099	-4.7851	6.91499e-06	0.000226098	-0.00474661	-3.62677	0.000482652	0.00649891
NVEC200_000338_1.1	4.97816	0.143888	1.92492	0.0575011	0.251662	0.00242566	0.0326456	0.974032	0.991572	0.0731569	1.38404	0.169879	0.621223	0.0013259	0.158402	0.874506	0.943003	-0.160289	-3.05526	0.0029835	0.14384	-0.141463	-1.34626	0.18171	0.43093	0.00116596	0.659808	0.511117	0.714297
NVEC200_000339_1.1	1.72664	0.389745	1.64891	0.102765	0.346136	0.0669649	0.279708	0.780364	0.92752	0.228355	1.36618	0.175398	0.627497	0.0144097	0.537575	0.59224	0.775069	-0.252077	-1.49015	0.139794	0.594066	-0.32278	-0.953419	0.343014	0.613726	0.00473159	0.848625	0.398414	0.62191
NVEC200_000340_1.1	5.97292	0.213155	2.13934	0.0354391	0.190547	-0.137872	-1.42738	0.15734	0.470581	0.0376417	0.53402	0.5948	0.881461	0.011796	1.08802	0.279833	0.51108	0.122922	1.80765	0.0743982	0.491856	-0.351027	-2.57106	0.0119805	0.0726274	-0.00555987	-2.41452	0.018025	0.0897889
NVEC200_000342_1.1	4.57965	0.132318	1.47961	0.142583	0.40975	-0.0822075	-0.951441	0.344012	0.677335	0.0250551	0.395989	0.693081	0.916171	-0.0148307	-1.52382	0.131174	0.321913	0.0603654	0.997683	0.321195	0.757194	-0.214525	-1.75675	0.0824726	0.270811	-0.000158399	-0.0771831	0.938655	0.970796
NVEC200_000343_1.1	2.82052	0.400513	2.61208	0.0105965	0.0920659	-0.254898	-1.76489	0.0810845	0.337002	0.0728079	0.670321	0.504425	0.845468	-0.027735	-1.71817	0.0893153	0.251787	0.150051	1.49743	0.137894	0.590495	-0.655411	-3.21539	0.00182792	0.0189162	-0.00780571	-2.30285	0.0236686	0.107136
NVEC200_000344_1.1	6.53845	-0.089481	-1.50898	0.134919	0.399162	0.0870192	1.49165	0.139403	0.443763	-0.00123087	-0.029351	0.976652	0.994953	0.0061421	0.936569	0.351568	0.584776	0.0060128	0.146219	0.884086	0.97699	0.1765	2.13964	0.0351789	0.154477	-0.00239217	-1.71217	0.0904205	0.25407
NVEC200_000345_1.1	2.33991	0.0338137	0.163054	0.870854	0.946953	-0.499715	-2.52102	0.013521	0.128758	-0.232951	-1.58698	0.116137	0.563899	-0.040726	-1.81465	0.0730171	0.221374	0.00150303	0.0109605	0.99128	0.999586	-0.533528	-1.90539	0.0600263	0.221327	-0.00137224	-0.287092	0.774723	0.888392
NVEC200_000346_1.1	2.56908	0.135888	0.796339	0.427999	0.703922	-0.157839	-0.939503	0.350069	0.683333	-0.0109757	-0.0909521	0.927739	0.987529	0.0205251	1.08167	0.282381	0.514005	-0.146706	-1.22865	0.22251	0.679369	-0.293728	-1.23642	0.219623	0.482927	-0.00260708	-0.653167	0.515367	0.718115
NVEC200_000347_1.1	10.737	0.00824855	0.191052	0.848929	0.938827	0.00687753	0.160765	0.872651	0.961217	0.00756304	0.247724	0.804931	0.958245	-0.0108029	-2.25279	0.0267831	0.114769	-0.0792784	-2.62913	0.0101173	0.246619	-0.00137102	-0.0226623	0.981971	0.992921	0.00304756	2.97379	0.00380363	0.0302666
NVEC200_000348_1.1	0.17494	-0.714713	-1.43387	0.155416	0.429798	0.00205517	0.00410671	0.996733	0.998032	-0.356329	-1.01097	0.315006	0.742262	-0.0364686	-0.646035	0.520062	0.726221	-0.152446	-0.437145	0.663156	0.914781	0.716769	1.01278	0.314148	0.58411	0.0123777	1.02581	0.308	0.537374
NVEC200_000349_1.1	5.40933	-0.145286	-1.64639	0.103285	0.347316	0.193897	2.26984	0.0256838	0.178755	0.0243058	0.389318	0.697991	0.917158	0.0117936	1.22736	0.222993	0.447151	0.111375	1.85686	0.0667085	0.474356	0.339183	2.80924	0.00612936	0.0445357	-0.00768527	-3.7729	0.000293592	0.00441146
NVEC200_000351_1.1	7.94264	0.204292	3.29032	0.00144535	0.0243079	-0.0997361	-1.62515	0.10774	0.391381	0.0522781	1.19067	0.237016	0.680645	-0.0523933	-7.61234	2.98663e-11	5.64887e-09	-0.0259879	-0.60193	0.548783	0.878292	-0.304028	-3.50325	0.000727659	0.00925113	0.00413205	2.81217	0.00607839	0.0420528
NVEC200_000352_1.1	3.06702	0.223649	1.3716	0.173707	0.45573	-0.402286	-2.57363	0.0117533	0.119387	-0.0893187	-0.773982	0.441035	0.811272	-0.0467768	-2.64469	0.00969715	0.0569987	0.0401375	0.370053	0.712241	0.929173	-0.625935	-2.83432	0.00570612	0.04249	0.00565295	1.52232	0.131549	0.319272
NVEC200_000353_1.1	2.20367	0.200368	1.14987	0.253342	0.550579	-0.620832	-3.45222	0.000859883	0.024642	-0.210232	-1.70537	0.091687	0.525012	-0.0148291	-0.735456	0.464036	0.683361	-0.362966	-2.87289	0.00510733	0.186944	-0.8212	-3.23044	0.00174418	0.0181566	0.0114275	2.65561	0.00941191	0.0571328
NVEC200_000354_1.1	1.95431	-0.429879	-2.2423	0.0274796	0.165128	0.102281	0.542192	0.589069	0.835785	-0.163799	-1.20814	0.230261	0.677555	0.0171408	0.806212	0.422315	0.648587	-0.130051	-0.984746	0.327475	0.759415	0.53216	1.99501	0.0491653	0.193792	-0.00244649	-0.544067	0.587784	0.768657
NVEC200_000355_1.1	4.23236	0.0798431	0.668402	0.505643	0.756858	0.0171704	0.149439	0.881552	0.963874	0.0485067	0.573837	0.567556	0.871755	-0.0240784	-1.86026	0.0662216	0.208264	0.0775706	0.967719	0.335862	0.766075	-0.0626727	-0.386015	0.700426	0.864388	0.0017916	0.659468	0.511334	0.714438
NVEC200_000356_1.1	3.26635	-0.031426	-0.19797	0.843529	0.936975	-0.193052	-1.20383	0.231912	0.564469	-0.112239	-0.999877	0.320138	0.745271	-0.00872077	-0.480275	0.632235	0.802219	-0.246328	-2.1777	0.0321293	0.377375	-0.161626	-0.712707	0.477931	0.727549	0.00212655	0.551358	0.582799	0.76551
NVEC200_000357_1.1	6.63163	0.0694885	0.678651	0.499413	0.752807	0.210954	2.10295	0.0387688	0.226964	0.140221	1.93629	0.0565369	0.454885	-0.0315063	-2.79816	0.00650411	0.0431442	0.0800307	1.13719	0.259021	0.713302	0.141465	0.997404	0.321723	0.591927	0.00163782	0.684511	0.495727	0.701873
NVEC200_000358_1.1	7.35162	0.00743094	0.140452	0.888627	0.955799	0.0503455	0.960712	0.339354	0.673117	0.0288882	0.772149	0.442115	0.811272	0.00634694	1.07926	0.28345	0.514939	-0.0926245	-2.5048	0.0141121	0.279324	0.0429146	0.579085	0.564025	0.784315	-0.000484619	-0.386233	0.700265	0.84164
NVEC200_000359_1.1	6.33924	0.215246	2.91809	0.00447944	0.0528809	-0.0562495	-0.778203	0.438557	0.748873	0.0794984	1.52387	0.131162	0.580591	0.00298825	0.368164	0.713643	0.856184	0.0191828	0.376645	0.707353	0.927693	-0.271496	-2.65654	0.00938802	0.0612288	-0.00474047	-2.74905	0.00726494	0.0478389
NVEC200_000360_1.1	5.72245	-0.0666858	-1.08513	0.280857	0.579089	-0.0666841	-1.11291	0.268807	0.606361	-0.066685	-1.53409	0.128628	0.577829	0.0120116	1.78088	0.0784163	0.231281	0.0414052	0.980518	0.329544	0.761401	1.63759e-06	1.93319e-05	0.999985	0.999985	0.00183349	1.27868	0.204404	0.417742
NVEC200_000361_1.1	4.30467	0.0610585	0.698896	0.486478	0.744802	0.0356405	0.419778	0.675681	0.879308	0.0483495	0.782341	0.436134	0.811272	0.0121976	1.27395	0.206067	0.425351	-0.00448434	-0.0749541	0.940423	0.990029	-0.025418	-0.211782	0.832772	0.929548	-0.00655281	-3.24206	0.00168203	0.01669
NVEC200_000363_1.1	5.19073	-0.0413546	-0.584484	0.560404	0.790785	0.0911194	1.31818	0.190896	0.515487	0.0248824	0.497209	0.620294	0.890875	0.0134603	1.72932	0.0872922	0.248108	0.00539229	0.110662	0.912139	0.983842	0.132474	1.35551	0.178756	0.427139	0.000219381	0.133309	0.894256	0.948459
NVEC200_000364_1.1	4.90447	-0.155343	-1.60574	0.111949	0.362804	-0.159413	-1.66206	0.100093	0.375392	-0.157378	-2.30051	0.0238064	0.375283	0.0185979	1.71539	0.0898269	0.252408	-0.14869	-2.18844	0.0313117	0.377375	-0.00406966	-0.0300043	0.976132	0.990655	-0.000335833	-0.145461	0.884683	0.945165
NVEC200_000365_1.1	3.09478	0.0772723	0.214633	0.830658	0.930961	0.698417	1.98197	0.0512813	0.265057	0.387845	1.52316	0.132078	0.581087	-0.000957777	-0.0245449	0.980486	0.991616	0.0369811	0.152497	0.87922	0.97617	0.621144	1.24671	0.216526	0.478755	0.0116531	1.45903	0.148884	0.343861
NVEC200_000367_1.1	3.27805	0.147073	1.18429	0.239517	0.53597	0.203494	1.68013	0.0965127	0.367411	0.175284	1.99547	0.0491139	0.441452	0.0491956	3.60539	0.000518523	0.00673946	-0.0431293	-0.5002	0.618195	0.902038	0.0564211	0.329503	0.742566	0.88623	-0.00475681	-1.67188	0.0981343	0.266818
NVEC200_000368_1.1	3.91577	-0.68566	-6.84669	1.01029e-09	2.5348e-07	0.464943	4.7968	6.60322e-06	0.000770544	-0.110358	-1.55762	0.122947	0.572622	0.0666136	6.13884	2.3935e-08	2.11696e-06	0.0684699	1.0043	0.318015	0.753744	1.1506	8.39866	7.53362e-13	2.05819e-10	-0.00106812	-0.468563	0.640552	0.805603
NVEC200_000369_1.1	1.27916	-0.629225	-1.67821	0.096993	0.335141	-0.0442141	-0.128088	0.898383	0.9696	-0.33672	-1.2657	0.209094	0.654014	-0.0177666	-0.463726	0.644034	0.810664	0.374552	1.60711	0.111753	0.557677	0.585011	1.20331	0.232212	0.49857	0.00155656	0.193177	0.847283	0.923694
NVEC200_000370_1.1	7.38029	0.070948	1.36388	0.176116	0.459832	-0.135322	-2.63778	0.00988165	0.109644	-0.032187	-0.874964	0.383998	0.783659	-0.00679574	-1.18076	0.24091	0.469341	0.00727775	0.201333	0.840907	0.9676	-0.20627	-2.84338	0.00555995	0.0416032	0.00305767	2.4876	0.0147645	0.0782391
NVEC200_000372_1.1	5.77891	-0.0284305	-0.379627	0.705145	0.873061	-0.100339	-1.35572	0.178691	0.497019	-0.0643845	-1.21574	0.227368	0.673231	-0.000197756	-0.0237158	0.981134	0.991864	-0.108766	-2.08239	0.0402382	0.409849	-0.0719081	-0.687062	0.493868	0.7381	0.00263457	1.48542	0.14104	0.332644
NVEC200_000373_1.1	1.80827	0.0818063	0.416176	0.678304	0.857664	0.327448	1.73175	0.0868555	0.348727	0.204627	1.4711	0.144866	0.595909	0.00104684	0.0494926	0.96064	0.982865	0.0469659	0.358106	0.72113	0.931482	0.245641	0.919358	0.360446	0.630344	-0.00514103	-1.17665	0.24254	0.464381
NVEC200_000374_1.1	3.41459	-0.669513	-3.82659	0.000248722	0.00669099	0.31712	1.88434	0.0629689	0.295109	-0.176196	-1.4231	0.1584	0.608994	0.0372946	1.97953	0.0510226	0.176547	0.0548019	0.466391	0.64214	0.909521	0.986633	4.14888	7.9461e-05	0.00161737	-5.67117e-05	-0.0142745	0.988645	0.995579
NVEC200_000375_1.1	3.59236	-0.0478288	-0.420403	0.675225	0.856447	0.0309621	0.281801	0.778764	0.926648	-0.00843336	-0.104768	0.916801	0.984552	0.0261521	2.10787	0.0379137	0.145387	0.0232986	0.300582	0.764449	0.942379	0.0787908	0.507407	0.613151	0.815323	-0.00539016	-2.05971	0.0424095	0.157137
NVEC200_000376_1.1	3.81384	-0.0713953	-0.572052	0.568759	0.796447	0.0411936	0.343463	0.732077	0.907376	-0.0151009	-0.170977	0.864638	0.972412	-0.0131582	-0.972331	0.333576	0.567336	0.0971674	1.16106	0.248787	0.705721	0.112589	0.664362	0.508212	0.746014	-0.00451386	-1.58331	0.116972	0.297812
NVEC200_000377_1.1	5.12757	0.571601	6.00891	4.22602e-08	6.41416e-06	-0.612901	-6.68184	2.13082e-09	1.19074e-06	-0.02065	-0.306795	0.759731	0.938669	-0.0103432	-1.01103	0.314798	0.547931	0.0529248	0.826041	0.411036	0.813078	-1.1845	-9.13769	2.30956e-14	9.46458e-12	-0.00358965	-1.65444	0.101634	0.272814
NVEC200_000378_1.1	1.98526	-0.438954	-2.24526	0.0272812	0.164571	0.0840798	0.445045	0.657391	0.868468	-0.177437	-1.28278	0.202969	0.649423	0.00360679	0.169479	0.865812	0.939431	-0.0451184	-0.34386	0.73178	0.934216	0.523034	1.95884	0.0533279	0.204177	-0.00270178	-0.602656	0.548302	0.740913
NVEC200_000379_1.1	3.62275	0.266709	2.33959	0.0215904	0.142782	-0.127566	-1.16575	0.246896	0.58071	0.0695713	0.86235	0.390861	0.788314	-0.00954294	-0.775987	0.439857	0.662615	0.0181019	0.23643	0.813654	0.960171	-0.394275	-2.55005	0.012518	0.0747289	-0.00393655	-1.52225	0.131566	0.319272
NVEC200_000380_1.1	6.22389	0.140346	2.49235	0.0145817	0.111832	0.00394869	0.0715391	0.943133	0.984034	0.0721476	1.81158	0.0734956	0.490703	-0.0159432	-2.56947	0.0118851	0.0660777	0.0210374	0.542164	0.589089	0.889832	-0.136398	-1.74772	0.0840335	0.273095	-0.00535699	-4.06428	0.000105186	0.00197128
NVEC200_000381_1.1	2.94712	-0.0129886	-0.0898148	0.92864	0.97298	0.0829539	0.589842	0.556823	0.815699	0.0349827	0.341966	0.7332	0.928462	-0.0166495	-1.04746	0.297785	0.530588	-0.0332345	-0.338851	0.735537	0.935785	0.0959426	0.482585	0.6306	0.825982	0.000499989	0.150622	0.880622	0.943401
NVEC200_000383_1.1	6.21165	-0.019235	-0.351802	0.725836	0.883758	-0.0212436	-0.395148	0.693699	0.888646	-0.0202393	-0.523427	0.602006	0.883814	0.0293718	4.85663	5.21101e-06	0.000184623	-0.0224562	-0.590158	0.556612	0.880673	-0.00200865	-0.0264232	0.97898	0.991674	0.00201541	1.56679	0.120787	0.304582
NVEC200_000384_1.1	6.27007	0.0251673	0.373094	0.709984	0.87439	-0.0670234	-1.00688	0.316778	0.65245	-0.0209281	-0.438721	0.661949	0.904424	0.0169025	2.25804	0.0264401	0.113695	-0.0742464	-1.57758	0.118283	0.56549	-0.0921907	-0.979408	0.330089	0.600046	0.00562764	3.53249	0.000660797	0.00826433
NVEC200_000386_1.1	9.07088	0.188405	3.88756	0.000197107	0.00560935	-0.0838896	-1.74981	0.0836701	0.342366	0.0522577	1.52484	0.130919	0.580188	-0.0077592	-1.4446	0.152154	0.353875	-0.00855174	-0.253158	0.800742	0.953261	-0.272295	-4.01637	0.000124915	0.00234102	-0.00184835	-1.61022	0.110966	0.287931
NVEC200_000387_1.1	4.50746	-0.0122823	-0.137732	0.89077	0.95645	0.0346135	0.403505	0.687565	0.885253	0.0111656	0.176939	0.859966	0.971105	0.0110496	1.14363	0.255908	0.485965	0.109435	1.81728	0.0726111	0.48807	0.0468958	0.38688	0.699788	0.864121	-0.00841363	-4.11978	8.60637e-05	0.00168214
NVEC200_000389_1.1	3.2814	-0.190882	-1.70363	0.0920126	0.326937	0.105813	0.979422	0.330082	0.664161	-0.0425343	-0.536509	0.592974	0.880796	-0.0164127	-1.34444	0.182296	0.395403	0.0490189	0.651614	0.516365	0.861823	0.296696	1.94328	0.0552089	0.208907	-0.000811067	-0.316192	0.752612	0.875094
NVEC200_000390_1.1	3.20115	-0.217656	-1.48347	0.141557	0.408044	0.104312	0.728995	0.467959	0.769232	-0.0566722	-0.546078	0.586408	0.878503	0.0311037	1.92303	0.0577413	0.191805	-0.0339466	-0.334999	0.738431	0.936328	0.321969	1.59159	0.115096	0.333254	0.000150721	0.044319	0.964751	0.98358
NVEC200_000391_1.1	4.54329	-0.14359	-1.44398	0.152331	0.424501	0.160142	1.67143	0.0982229	0.371669	0.00827559	0.117611	0.906646	0.981807	-0.0152806	-1.41553	0.160476	0.365487	0.083101	1.24451	0.216648	0.673441	0.303732	2.24329	0.0274136	0.130629	-0.00650035	-2.85309	0.00540713	0.0385141
NVEC200_000392_1.1	2.26416	0.400783	2.04188	0.0441865	0.217989	-0.159303	-0.831337	0.408055	0.727377	0.12074	0.869682	0.386863	0.786001	-0.0513362	-2.3724	0.019873	0.0938605	-0.117524	-0.882899	0.37972	0.796689	-0.560086	-2.0674	0.0416621	0.174038	-0.00177173	-0.391805	0.696158	0.838671
NVEC200_000393_1.1	4.29916	-0.0584289	-0.497118	0.620358	0.826651	-0.0824454	-0.731862	0.466216	0.768112	-0.0704371	-0.846752	0.399452	0.793101	0.00908655	0.715933	0.475946	0.692146	0.108151	1.36818	0.174772	0.636069	-0.0240165	-0.150898	0.880405	0.952187	0.00223886	0.835193	0.405892	0.628152
NVEC200_000394_1.1	4.20088	0.021157	0.242693	0.808813	0.921638	-0.0763871	-0.892456	0.374606	0.702472	-0.0276151	-0.447911	0.655328	0.902721	0.0173734	1.79788	0.0756586	0.226356	-0.0733009	-1.20927	0.229829	0.688144	-0.0975441	-0.805988	0.422443	0.687398	0.00317523	1.5581	0.122833	0.306684
NVEC200_000395_1.1	7.39546	-0.0718331	-1.16008	0.249183	0.546476	-0.0827076	-1.34833	0.181047	0.500628	-0.0772704	-1.76471	0.0811158	0.504196	0.00123413	0.179228	0.858175	0.935807	-0.104208	-2.40779	0.0181578	0.304744	-0.0108745	-0.125361	0.900526	0.961741	0.00328164	2.23047	0.0282842	0.120279
NVEC200_000396_1.1	5.16857	-0.0170651	-0.251382	0.80211	0.919262	0.128032	1.94717	0.0547338	0.273643	0.0554836	1.15527	0.251137	0.69204	-0.000906489	-0.122589	0.902715	0.95631	0.0951818	2.064	0.0419913	0.418009	0.145097	1.56122	0.122094	0.3438	-0.00028784	-0.184318	0.854192	0.927693
NVEC200_000397_1.1	4.88986	-0.129507	-1.51344	0.133785	0.39709	-0.0571505	-0.688854	0.492744	0.784587	-0.0933286	-1.54169	0.126773	0.574897	0.0293897	3.13951	0.00231031	0.0206266	0.0501274	0.854431	0.395208	0.804329	0.0723563	0.617007	0.538839	0.766545	0.000564598	0.284381	0.776793	0.889024
NVEC200_000398_1.1	5.07983	0.54736	4.98971	3.20908e-06	0.000232073	-0.498855	-4.69896	1.00772e-05	0.00105889	0.0242525	0.312493	0.755438	0.936698	-0.0308893	-2.6021	0.0109443	0.0624356	0.0277286	0.374594	0.708903	0.928166	-1.04622	-6.9724	6.51012e-10	7.84661e-08	0.00698713	2.78695	0.00657312	0.0445234
NVEC200_000399_1.1	2.38931	-0.0942696	-0.579186	0.563957	0.792272	-0.249062	-1.54618	0.125685	0.422524	-0.171666	-1.4915	0.139442	0.590891	0.0329386	1.80169	0.0750509	0.225126	-0.153615	-1.3342	0.185615	0.64904	-0.154793	-0.679533	0.498601	0.741177	0.00414778	1.07078	0.287224	0.515885
NVEC200_000400_1.1	2.76321	-0.129358	-0.854694	0.395064	0.677205	0.124952	0.844546	0.400676	0.721521	-0.00220291	-0.0205787	0.983629	0.996196	0.0245048	1.46548	0.146388	0.345861	-0.0574178	-0.549279	0.584218	0.888358	0.254309	1.21575	0.227361	0.493412	-0.00127609	-0.363634	0.717012	0.853087
NVEC200_000401_1.1	4.32832	0.341478	3.97227	0.000146172	0.00443712	0.0451779	0.545528	0.586784	0.835023	0.193328	3.17821	0.00205112	0.185546	-0.0223085	-2.40179	0.0184391	0.089213	0.0518072	0.897577	0.371884	0.790993	-0.2963	-2.53183	0.0131393	0.0771137	-0.00738254	-3.79593	0.000271175	0.00415689
NVEC200_000402_1.1	0.884083	-0.0419603	-0.172237	0.863651	0.944678	0.883132	3.531	0.000664059	0.0205641	0.420586	2.44066	0.0166838	0.336594	0.0019507	0.0709228	0.943622	0.973637	-0.309666	-1.79766	0.0756928	0.493717	0.925092	2.61629	0.0104764	0.0662197	-0.00352961	-0.624697	0.533802	0.730553
NVEC200_000403_1.1	5.77683	0.117742	1.34847	0.181002	0.466019	-0.0600155	-0.69968	0.48599	0.779902	0.0288631	0.467411	0.641372	0.89751	-0.0250296	-2.59244	0.011174	0.063452	-0.0461804	-0.766632	0.445371	0.829857	-0.177757	-1.46561	0.146351	0.381553	0.00283404	1.38484	0.169635	0.374348
NVEC200_000404_1.1	3.57049	0.205475	1.61333	0.110288	0.359269	-0.0885101	-0.713978	0.477148	0.775865	0.0584823	0.64915	0.517948	0.851296	-0.0171989	-1.22928	0.222274	0.446438	-0.0762259	-0.877472	0.382642	0.797426	-0.293985	-1.67753	0.0970221	0.298473	-0.000626036	-0.213125	0.831727	0.917335
NVEC200_000407_1.1	4.85682	0.00353057	0.0122934	0.990225	0.995205	-0.215432	-0.772804	0.442161	0.751906	-0.105951	-0.521496	0.603617	0.884447	0.014011	0.44555	0.657255	0.819753	0.0218189	0.111026	0.911903	0.983842	-0.218962	-0.555672	0.580152	0.793712	-0.00487045	-0.728309	0.46878	0.681952
NVEC200_000409_1.1	5.36355	-0.0672888	-0.328922	0.743166	0.891451	0.0157967	0.0783213	0.937789	0.98288	-0.0257461	-0.177964	0.859249	0.970968	0.00712179	0.313188	0.75504	0.876779	-0.0819486	-0.575916	0.566461	0.880971	0.0830855	0.291319	0.771642	0.901336	-0.00448195	-0.928852	0.356058	0.584434
NVEC200_000411_1.1	5.60962	0.033744	0.539216	0.591112	0.81025	-0.00168128	-0.0273591	0.978236	0.992362	0.0160313	0.362226	0.71806	0.923632	0.00915693	1.32407	0.18894	0.40369	-0.0379093	-0.873988	0.384526	0.798586	-0.0354252	-0.407694	0.684498	0.85564	0.00419552	2.86129	0.00528103	0.0379456
NVEC200_000413_1.1	7.59666	0.0623138	0.925835	0.357088	0.648072	-0.079621	-1.19711	0.234511	0.567787	-0.00865359	-0.181815	0.85615	0.970845	-0.0232112	-3.11047	0.00252448	0.0219026	-0.0303059	-0.647026	0.519316	0.863828	-0.141935	-1.50907	0.134896	0.365058	0.00194174	1.21844	0.226345	0.444234
NVEC200_000414_1.1	4.98105	-0.00736099	-0.0873942	0.930559	0.973881	-0.0273566	-0.331039	0.74141	0.910061	-0.0173588	-0.291408	0.771431	0.94411	0.00593805	0.637351	0.525567	0.729634	-0.0647192	-1.10988	0.270101	0.721266	-0.0199956	-0.171127	0.864521	0.945336	0.00793847	4.0267	0.000120379	0.00218603
NVEC200_000415_1.1	4.9281	0.0391345	0.441773	0.659748	0.849314	0.107352	1.23391	0.220551	0.55176	0.0732434	1.1691	0.24555	0.684392	0.00653201	0.666928	0.50658	0.71597	-0.0706983	-1.15303	0.252051	0.707238	0.0682178	0.554536	0.580632	0.793849	0.00451867	2.18946	0.0312351	0.128473
NVEC200_000416_1.1	2.1589	-0.335211	-1.76654	0.0808062	0.302415	-0.233492	-1.2722	0.206685	0.535534	-0.284352	-2.11804	0.0370188	0.410008	-0.0148188	-0.712035	0.478345	0.693787	-0.00368723	-0.0288612	0.977041	0.997669	0.101719	0.392129	0.69592	0.862174	0.000939094	0.212127	0.832503	0.917507
NVEC200_000417_1.1	3.2815	-0.588705	-2.87094	0.005226	0.0583017	-0.0097175	-0.0509356	0.959503	0.98747	-0.299211	-2.05817	0.0428039	0.423697	0.0169109	0.79435	0.429324	0.655014	0.266309	2.02476	0.0462027	0.432572	0.578987	2.15249	0.0343487	0.151814	-0.000201308	-0.0446201	0.96452	0.983561
NVEC200_000418_1.1	3.99708	0.342757	3.53501	0.000655325	0.0137719	-0.0275717	-0.292081	0.770919	0.92274	0.157592	2.29773	0.0239716	0.375423	0.0255028	2.40739	0.0181764	0.0885694	-0.0515744	-0.771811	0.442314	0.828013	-0.370328	-2.77508	0.00675206	0.0480381	0.00170837	0.770576	0.443042	0.659973
NVEC200_000420_1.1	2.42961	0.000765975	0.00401988	0.996802	0.99839	0.225441	1.23221	0.221184	0.552256	0.113104	0.838748	0.403905	0.796996	-0.0323444	-1.56624	0.120916	0.305771	0.0552963	0.435774	0.664078	0.915192	0.224675	0.869124	0.387166	0.656255	0.00392173	0.915572	0.362418	0.59061
NVEC200_000422_1.1	4.74192	-0.388766	-4.87036	4.93441e-06	0.000324404	0.12865	1.63835	0.104953	0.385373	-0.130058	-2.30391	0.0236062	0.373506	0.0447815	5.05142	2.38642e-06	0.00010082	-0.080643	-1.4465	0.151623	0.611967	0.517417	4.65996	1.12841e-05	0.000342536	0.00355545	1.89231	0.061769	0.199417
NVEC200_000423_1.1	0.586967	-0.212594	-0.723032	0.471596	0.732862	0.077623	0.258165	0.796888	0.933525	-0.0674857	-0.324507	0.746331	0.93352	-0.00663581	-0.195435	0.845507	0.929459	-0.31055	-1.45797	0.148441	0.605869	0.290218	0.682683	0.496617	0.739781	0.0162094	2.25243	0.0268068	0.116248
NVEC200_000424_1.1	4.50165	0.087662	1.03352	0.304219	0.59937	0.0235004	0.287167	0.774666	0.924815	0.0555812	0.926131	0.356935	0.769718	-0.013534	-1.46824	0.145639	0.344589	0.0603082	1.0532	0.295161	0.73712	-0.0641616	-0.554778	0.580468	0.793712	-0.00590921	-3.04029	0.0031206	0.0262433
NVEC200_000425_1.1	4.53337	0.0557173	0.647896	0.518755	0.764281	0.0281892	0.338381	0.735889	0.908064	0.0419533	0.689566	0.492299	0.839668	0.00490862	0.523093	0.602237	0.781573	0.0297818	0.508726	0.612229	0.900918	-0.0275282	-0.233787	0.815698	0.921032	-0.00150833	-0.76261	0.447755	0.663937
NVEC200_000426_1.1	3.71493	0.183351	1.37792	0.171756	0.453	-0.0127453	-0.0953142	0.924284	0.977566	0.0853027	0.906594	0.367121	0.77408	0.00952445	0.632783	0.528532	0.730525	-0.272008	-2.87695	0.00504787	0.186362	-0.196096	-1.03697	0.302619	0.572897	0.000580848	0.183883	0.854532	0.927776
NVEC200_000427_1.1	5.58726	0.0846458	1.30049	0.19686	0.487254	-0.194375	-3.07489	0.00281209	0.0532642	-0.0548646	-1.19158	0.236659	0.679944	0.018064	2.54077	0.0128311	0.0699227	0.0538119	1.20664	0.230834	0.689135	-0.279021	-3.12253	0.00243336	0.0227323	-0.000631816	-0.418402	0.676682	0.827034
NVEC200_000428_1.1	4.84824	0.149257	1.50833	0.135085	0.399207	-0.214801	-2.22476	0.0286796	0.19069	-0.0327718	-0.468216	0.640799	0.89751	-0.0179331	-1.64769	0.103016	0.277134	-0.053612	-0.791342	0.430892	0.824382	-0.364058	-2.66712	0.00911947	0.0598584	-9.89108e-06	-0.00429643	0.996582	0.99852
NVEC200_000429_1.1	3.40619	0.0712381	0.549843	0.583833	0.805559	0.023207	0.192796	0.847568	0.952756	0.0472225	0.514054	0.608515	0.886106	0.00607762	0.452736	0.651864	0.816257	0.324184	3.89301	0.000193379	0.033963	-0.0480311	-0.28305	0.77781	0.904309	0.000231865	0.082774	0.934221	0.968842
NVEC200_000431_1.1	2.23484	-0.85615	-0.757873	0.450994	0.719786	-1.15877	-0.856707	0.394441	0.717013	-1.00746	-1.24057	0.218782	0.662175	-0.0978244	-0.663598	0.509061	0.717953	-0.645703	-0.729004	0.468357	0.840704	-0.302625	-0.160092	0.873256	0.949399	0.00820771	0.257133	0.797807	0.900417
NVEC200_000433_1.1	5.81481	-0.0216182	-0.244809	0.807181	0.921431	-0.0667326	-0.774975	0.440455	0.751034	-0.0441754	-0.707238	0.481308	0.833761	6.22197e-05	0.00641989	0.994892	0.997661	0.0429334	0.70864	0.480442	0.846171	-0.0451144	-0.370591	0.711843	0.869358	-0.00230713	-1.11975	0.2659	0.492093
NVEC200_000435_1.1	1.80915	0.0960592	0.407119	0.684919	0.861161	-0.458588	-1.97219	0.0517578	0.266574	-0.181265	-1.08634	0.280326	0.718086	0.00678341	0.258239	0.796831	0.900638	-0.137876	-0.838955	0.403789	0.809809	-0.554648	-1.68685	0.0952083	0.294537	0.00852329	1.52375	0.13119	0.318808
NVEC200_000436_1.1	1.46331	-0.088384	-0.378891	0.70569	0.873061	0.445491	1.9782	0.0510642	0.265057	0.178553	1.08182	0.282317	0.71844	-0.104598	-4.07511	0.000101158	0.00194015	0.0277026	0.179711	0.857797	0.97115	0.533875	1.67743	0.09704	0.298473	0.00666981	1.27602	0.205337	0.418851
NVEC200_000437_1.1	4.39877	0.0540896	0.618792	0.537667	0.775536	0.044295	0.51904	0.605048	0.845196	0.0491923	0.795642	0.428402	0.809097	0.00041841	0.0434831	0.965416	0.98488	-0.0114847	-0.191433	0.848632	0.969346	-0.00979464	-0.0811804	0.935485	0.975381	-0.00104215	-0.514231	0.608392	0.782771
NVEC200_000439_1.1	3.21054	-0.055518	-0.393095	0.695209	0.86717	-0.0228335	-0.162359	0.871399	0.961057	-0.0391758	-0.392276	0.695812	0.916173	-0.0362311	-2.26772	0.0258182	0.111961	-0.196313	-1.99474	0.0491949	0.434904	0.0326845	0.164337	0.869846	0.947704	0.00129095	0.383787	0.702071	0.842732
NVEC200_000440_1.1	5.51004	-0.0490694	-0.737134	0.46302	0.728484	-0.0939999	-1.44573	0.15184	0.462403	-0.0715347	-1.51931	0.132303	0.581314	0.00982065	1.34093	0.183427	0.396719	0.0117846	0.257082	0.797721	0.95251	-0.0449305	-0.488778	0.626227	0.822861	0.00320747	2.06104	0.0422794	0.156886
NVEC200_000441_1.1	6.08715	0.0530011	0.743846	0.45897	0.72508	0.0995155	1.42886	0.156617	0.469542	0.0762583	1.51317	0.133854	0.582859	0.00413593	0.528299	0.598634	0.779702	0.0435658	0.88876	0.376578	0.795063	0.0465145	0.47238	0.637836	0.831026	-0.00836336	-5.02976	2.60482e-06	0.000110207
NVEC200_000442_1.1	3.04291	-0.110913	-0.783686	0.435349	0.709301	-0.379066	-2.68466	0.00868955	0.101752	-0.24499	-2.44805	0.0163674	0.335163	-0.0140853	-0.879887	0.38134	0.612115	-0.168128	-1.69296	0.0940341	0.52481	-0.268153	-1.3429	0.182791	0.432576	0.0027755	0.813858	0.417944	0.639142
NVEC200_000443_1.1	4.70315	-0.205715	-1.4512	0.150728	0.422204	-0.0765515	-0.565536	0.57333	0.825798	-0.141133	-1.40651	0.163539	0.612852	0.0236008	1.54806	0.12565	0.313018	0.148656	1.56305	0.122085	0.570687	0.129163	0.675523	0.501339	0.742474	-0.00369428	-1.14108	0.257325	0.481996
NVEC200_000444_1.1	3.33613	-0.100919	-0.879757	0.38141	0.668147	0.138686	1.23811	0.218999	0.549351	0.0188835	0.232735	0.816513	0.962888	0.0382919	3.02754	0.00324206	0.0262396	-0.00617226	-0.0775845	0.938336	0.989153	0.239606	1.513	0.133898	0.363628	0.00841642	3.17884	0.00204713	0.019315
NVEC200_000445_1.1	3.70992	0.048296	0.458159	0.647978	0.841564	-0.0374852	-0.359492	0.720096	0.903179	0.0054054	0.072514	0.942359	0.989525	-0.0129796	-1.1007	0.274057	0.504843	-0.129973	-1.77331	0.0796705	0.502808	-0.0857812	-0.581746	0.562239	0.78329	-0.00343642	-1.38149	0.17066	0.375665
NVEC200_000446_1.1	6.40634	0.0120903	0.210302	0.833923	0.93233	0.112477	1.99388	0.0492907	0.259743	0.0622836	1.53185	0.129181	0.577829	0.00324229	0.511571	0.610245	0.78728	0.0345387	0.869404	0.387014	0.799291	0.100387	1.25857	0.211545	0.472272	-0.00267197	-1.98288	0.0505293	0.17565
NVEC200_000447_1.1	4.41955	-0.0515045	-0.513062	0.609206	0.821239	-0.0110349	-0.114398	0.909185	0.972989	-0.0312697	-0.440166	0.660906	0.903813	-0.0310481	-2.85046	0.00544814	0.0377349	0.0971144	1.44523	0.15198	0.612402	0.0404696	0.296921	0.767233	0.898021	-0.00674029	-2.92723	0.00436147	0.0331365
NVEC200_000448_1.1	4.5802	-0.0923954	-1.0309	0.30544	0.600255	0.00978031	0.110655	0.912144	0.973584	-0.0413076	-0.65173	0.51629	0.851296	0.013736	1.37647	0.172203	0.381591	-0.0988689	-1.58199	0.117273	0.563627	0.102176	0.817512	0.415865	0.681206	0.00311381	1.47555	0.143667	0.336685
NVEC200_000449_1.1	5.34889	-0.310201	-4.4785	2.26753e-05	0.00106401	0.192517	2.84681	0.0055056	0.0789799	-0.0588418	-1.20106	0.23298	0.678662	0.0177962	2.33658	0.0217547	0.10002	0.0211804	0.445058	0.657381	0.913306	0.502717	5.2581	1.02548e-06	4.4829e-05	-0.00243042	-1.50312	0.136424	0.32681
NVEC200_000450_1.1	3.96831	-0.165708	-1.62821	0.10709	0.354632	0.159903	1.6104	0.110926	0.396778	-0.00290239	-0.0403186	0.967931	0.994538	-0.00819931	-0.732171	0.466028	0.685002	-0.0115745	-0.166644	0.868036	0.973068	0.325611	2.31953	0.022704	0.114161	0.00395092	1.67909	0.0967151	0.264034
NVEC200_000451_1.1	4.71259	-0.0214645	-0.216401	0.829181	0.930342	0.00305497	0.0318233	0.974686	0.991624	-0.00920475	-0.13117	0.895943	0.979727	0.00102666	0.0948674	0.924638	0.964775	0.0301677	0.447677	0.655497	0.912234	0.0245195	0.18071	0.857015	0.942494	-0.0044464	-1.94154	0.0554225	0.186475
NVEC200_000452_1.1	3.93229	-0.685104	-5.57924	2.67866e-07	2.7908e-05	0.416377	3.4962	0.000744703	0.0223302	-0.134364	-1.54672	0.125554	0.573096	0.0324181	2.43844	0.0167799	0.084235	0.04065	0.489284	0.62587	0.903952	1.10148	6.54318	3.97573e-09	3.75982e-07	0.0130439	4.64293	1.20557e-05	0.000372393
NVEC200_000453_1.1	4.62881	-0.230233	-3.01103	0.00340579	0.0430327	0.190858	2.57056	0.0118505	0.119829	-0.0196876	-0.363972	0.71676	0.923632	0.0071331	0.85293	0.396036	0.624931	0.0474603	0.911572	0.364508	0.785636	0.421091	4.01216	0.000126808	0.00237288	-0.00121648	-0.688752	0.492809	0.70022
NVEC200_000454_1.1	5.3677	0.0701063	1.06832	0.288324	0.58567	0.0278526	0.436714	0.663398	0.871441	0.0489795	1.05511	0.294291	0.726548	0.0125338	1.74758	0.0840583	0.242528	0.048469	1.07909	0.283523	0.730018	-0.0422538	-0.468673	0.640473	0.831875	-0.00118599	-0.781816	0.436441	0.653738
NVEC200_000455_1.1	5.4586	0.00799903	0.111413	0.911545	0.964667	-0.0274259	-0.386715	0.699909	0.891512	-0.00971343	-0.191317	0.848722	0.968577	-0.00525356	-0.657101	0.512848	0.72106	-0.107336	-2.14745	0.0345337	0.387723	-0.0354249	-0.35323	0.724769	0.876567	-0.0036058	-2.1256	0.0363652	0.14238
NVEC200_000457_1.1	8.42318	0.0220512	0.594238	0.553892	0.786383	0.0907755	2.46981	0.0154673	0.137994	0.0564134	2.14984	0.0343381	0.40205	-0.00487913	-1.18453	0.239421	0.467585	-0.0525065	-2.02629	0.0457925	0.431397	0.0687244	1.32224	0.189547	0.441249	0.00207777	2.3604	0.0204865	0.0977163
NVEC200_000458_1.1	3.7297	0.0964218	0.814656	0.41749	0.694508	-0.012931	-0.111461	0.911507	0.97349	0.0417454	0.498696	0.61925	0.890588	-0.0450994	-3.43036	0.000923199	0.0105384	-0.101236	-1.25126	0.214187	0.670341	-0.109353	-0.666651	0.506756	0.745092	-0.0008041	-0.29197	0.771003	0.886033
NVEC200_000459_1.1	3.7025	-0.00307104	-0.0268284	0.978658	0.99229	-0.356103	-3.24604	0.00166122	0.0381006	-0.179587	-2.2167	0.0292464	0.398606	0.000153331	0.0123949	0.990139	0.995646	0.050838	0.661447	0.51007	0.858619	-0.353032	-2.27775	0.025188	0.123224	0.000444394	0.169167	0.866057	0.935281
NVEC200_000461_1.1	6.67724	0.176847	2.9189	0.00446884	0.0528268	-0.138968	-2.3342	0.0218851	0.164358	0.0189393	0.442013	0.659575	0.903726	-0.00522055	-0.781102	0.436859	0.660395	0.00212374	0.0506398	0.959728	0.993761	-0.315815	-3.75153	0.000315965	0.00487999	-0.000386951	-0.271891	0.786349	0.894051
NVEC200_000462_1.1	2.9859	-0.0868525	-0.687406	0.493652	0.750113	0.343185	2.75039	0.0072376	0.092698	0.128166	1.43445	0.155022	0.607886	0.0307679	2.18943	0.0312372	0.127328	-0.0903275	-1.02328	0.309005	0.747376	0.430037	2.43721	0.0168335	0.0931794	0.00221071	0.754632	0.452504	0.668234
NVEC200_000463_1.1	6.29886	-0.0341504	-0.454251	0.650777	0.843663	-0.15043	-2.0269	0.0457285	0.249307	-0.09229	-1.73594	0.0861084	0.514141	0.0357361	4.27722	4.83006e-05	0.00109207	-0.0890319	-1.69188	0.0942404	0.52481	-0.116279	-1.10796	0.270928	0.540275	0.000902378	0.506995	0.613439	0.78624
NVEC200_000464_1.1	2.78428	-0.0865888	-0.582446	0.56177	0.791196	0.103305	0.721949	0.472258	0.772478	0.00835794	0.0794494	0.936857	0.988301	0.0532591	3.29625	0.00141849	0.0144004	0.0373606	0.367148	0.714399	0.929804	0.189894	0.939128	0.35026	0.62146	-0.00496931	-1.47267	0.144442	0.337979
NVEC200_000466_1.1	6.67704	-0.214158	-2.87732	0.00504235	0.0569244	0.201778	2.76719	0.00690388	0.0900986	-0.00619034	-0.117596	0.906659	0.981807	0.0302639	3.69377	0.000384857	0.00536444	0.10008	1.94559	0.0549268	0.449682	0.415936	4.03434	0.000117129	0.00223484	-0.00430826	-2.46664	0.0155957	0.0814154
NVEC200_000467_1.1	4.79652	-0.00107872	-0.0100485	0.992006	0.995975	-0.0107908	-0.103999	0.917409	0.974889	-0.00593474	-0.0781368	0.937898	0.988301	-0.014318	-1.2247	0.223988	0.448268	0.0602019	0.82832	0.409752	0.812577	-0.00971204	-0.0662281	0.947348	0.980939	0.00345277	1.39832	0.165565	0.368942
NVEC200_000469_1.1	4.86574	-0.111351	-1.27028	0.207366	0.498993	-0.0275359	-0.324227	0.746543	0.912326	-0.0694432	-1.11978	0.265883	0.705639	-0.0170669	-1.78131	0.0783451	0.231199	0.0497186	0.836571	0.405121	0.810506	0.0838146	0.698211	0.486904	0.732498	-0.000127832	-0.0630236	0.949892	0.977318
NVEC200_000470_1.1	4.94816	-0.18919	-2.03181	0.0452178	0.220686	-0.119813	-1.33499	0.185355	0.507949	-0.154502	-2.34498	0.0212999	0.363696	-0.0261683	-2.58375	0.0114383	0.0644171	0.103252	1.64817	0.102918	0.544909	0.0693767	0.547004	0.585773	0.79689	0.00945788	4.39477	3.11301e-05	0.000790729
NVEC200_000471_1.1	2.98915	0.220927	1.61624	0.109657	0.359116	-0.0946592	-0.707242	0.481303	0.777649	0.0631339	0.653036	0.515452	0.850631	-0.00802432	-0.530754	0.596939	0.778523	-0.0856023	-0.910231	0.365211	0.786104	-0.315586	-1.66767	0.0989711	0.301998	-0.00807971	-2.52818	0.0132673	0.0726861
NVEC200_000472_1.1	5.78034	0.066815	0.857112	0.393734	0.676319	0.0851845	1.12092	0.2654	0.601555	0.0759997	1.37832	0.171632	0.623536	0.00126881	0.148539	0.88226	0.946632	0.0566588	1.0603	0.291938	0.734348	0.0183695	0.170979	0.864636	0.945364	-0.00274721	-1.51791	0.132655	0.320712
NVEC200_000473_1.1	5.74537	0.0193827	0.261067	0.794657	0.914786	0.036045	0.495841	0.621254	0.853455	0.0277138	0.527781	0.598993	0.883611	-0.0112935	-1.38013	0.171077	0.379986	0.0111131	0.217519	0.828312	0.963292	0.0166624	0.162114	0.871591	0.94872	-0.0043808	-2.52386	0.0134198	0.0732606
NVEC200_000474_1.1	2.75911	0.00210568	0.0122341	0.990267	0.995205	0.155762	0.958565	0.340429	0.674493	0.0789339	0.647496	0.519013	0.851296	-0.0339447	-1.85779	0.066575	0.208923	0.15581	1.38951	0.168216	0.627552	0.153657	0.669895	0.504695	0.744324	-0.00953414	-2.50059	0.0142695	0.076473
NVEC200_000475_1.1	4.31461	0.167527	1.93861	0.0557842	0.247705	-0.0707644	-0.848158	0.398673	0.720672	0.0483811	0.79128	0.430929	0.810487	0.0144504	1.53824	0.127613	0.316181	0.0301719	0.513237	0.609084	0.899685	-0.238291	-2.02089	0.0463599	0.186258	-0.00730838	-3.68498	0.000396517	0.00560319
NVEC200_000477_1.1	1.95154	-0.254406	-1.11459	0.26809	0.56667	0.181746	0.842941	0.401569	0.721978	-0.0363299	-0.22473	0.822716	0.96365	0.0741932	3.06023	0.00293913	0.0245307	0.149331	0.973702	0.332899	0.764175	0.436152	1.43301	0.155431	0.394237	0.00597436	1.19379	0.235799	0.456235
NVEC200_000478_1.1	3.87024	0.17478	1.7785	0.0788084	0.297109	0.0649081	0.672824	0.502839	0.789637	0.119844	1.72433	0.0881938	0.518197	-0.0273092	-2.50802	0.0139929	0.0743924	-0.098746	-1.46358	0.146906	0.604843	-0.109872	-0.805473	0.422739	0.687454	0.00371201	1.63011	0.106686	0.280795
NVEC200_000479_1.1	4.6001	-0.448935	-3.90085	0.000188125	0.00540377	0.34338	3.08039	0.00276569	0.0527153	-0.0527779	-0.648219	0.518547	0.851296	0.0269543	2.15308	0.0340742	0.135481	0.0607963	0.779515	0.437788	0.825875	0.792315	5.02864	2.61668e-06	0.000100216	-0.00289436	-1.09464	0.276688	0.504763
NVEC200_000480_1.1	3.29163	-0.277231	-2.41799	0.0176885	0.125339	0.0747107	0.675969	0.50085	0.788809	-0.10126	-1.24817	0.215312	0.660457	0.0269973	2.16349	0.0332402	0.133417	0.0561444	0.722146	0.472138	0.841872	0.351942	2.25328	0.0267511	0.128543	-0.00605891	-2.2981	0.0239498	0.107932
NVEC200_000481_1.1	3.44343	0.0287615	0.223222	0.823885	0.928499	-0.00947389	-0.0753954	0.940073	0.983132	0.00964381	0.105816	0.915971	0.984366	-0.00501437	-0.353198	0.724792	0.861872	-0.0393035	-0.44589	0.656783	0.9128	-0.0382354	-0.215234	0.830088	0.928249	-0.00358838	-1.20192	0.23265	0.452036
NVEC200_000482_1.1	4.67933	0.0416244	0.280961	0.779504	0.906904	0.0177459	0.121603	0.903534	0.971323	0.0296851	0.283336	0.777689	0.947076	0.0159872	0.971375	0.334444	0.567986	-0.0825377	-0.799089	0.42673	0.822912	-0.0238784	-0.115715	0.908184	0.965355	0.00410422	1.18153	0.241079	0.463066
NVEC200_000483_1.1	0.611871	0.041474	0.117439	0.906782	0.962788	-0.802568	-2.33435	0.0218767	0.164358	-0.380547	-1.52337	0.131287	0.580591	-0.0188835	-0.49044	0.625055	0.797252	0.0215127	0.0905859	0.928029	0.987211	-0.844042	-1.73659	0.0859919	0.276388	-0.00558731	-0.669717	0.504809	0.709435
NVEC200_000484_1.1	0.217179	-1.22235	-1.12848	0.26285	0.561183	0.0162395	0.016161	0.98715	0.995899	-0.603055	-0.785128	0.434946	0.811272	-0.0447515	-0.399125	0.690979	0.842496	0.0643869	0.0960229	0.923768	0.986348	1.23859	0.874475	0.384758	0.653681	-0.0177806	-0.748314	0.4567	0.671567
NVEC200_000487_1.1	1.94949	0.221388	0.976935	0.331305	0.623491	0.0667399	0.309353	0.757791	0.917179	0.144064	0.897957	0.371682	0.776723	-0.0282316	-1.1666	0.246555	0.475922	0.0831277	0.556428	0.579344	0.886788	-0.154648	-0.507554	0.613048	0.815323	0.00670657	1.34897	0.180842	0.388044
NVEC200_000488_1.1	4.78839	0.0557121	0.261704	0.794291	0.914584	0.233818	1.17782	0.242718	0.57639	0.144765	0.959346	0.340573	0.758777	-0.00233995	-0.105948	0.915916	0.96129	0.429059	3.13522	0.00247985	0.129396	0.178106	0.636205	0.526646	0.759304	-0.00899329	-1.93682	0.0566639	0.188379
NVEC200_000490_1.1	3.30276	-0.150927	-0.923864	0.358108	0.649251	0.0298802	0.189191	0.850383	0.953375	-0.0605234	-0.523638	0.601859	0.883704	0.0252254	1.41316	0.161171	0.366077	0.0149765	0.133831	0.893845	0.97958	0.180807	0.809997	0.420148	0.685438	0.00158131	0.42159	0.674362	0.824854
NVEC200_000491_1.1	4.05841	-0.229492	-2.29059	0.0243999	0.153675	0.164465	1.68283	0.0959876	0.366368	-0.0325133	-0.4588	0.64752	0.899098	0.0149559	1.35707	0.178263	0.389958	0.00829989	0.120558	0.904319	0.982111	0.393957	2.85128	0.00543531	0.0409197	0.00740822	3.19084	0.0019726	0.0188139
NVEC200_000492_1.1	10.9377	0.0739874	1.63245	0.106192	0.35313	0.0175618	0.391868	0.696112	0.889947	0.0457746	1.42822	0.156802	0.608764	-0.0125832	-2.50538	0.0140905	0.0747965	0.00247892	0.0785156	0.937598	0.989153	-0.0564257	-0.890352	0.375728	0.644779	0.00148336	1.38244	0.170368	0.375397
NVEC200_000493_1.1	6.36072	-0.0238135	-0.457171	0.648686	0.842127	-0.0278093	-0.543118	0.588435	0.83565	-0.0258114	-0.700678	0.48537	0.836073	-0.00643146	-1.11687	0.267119	0.497119	-0.0128149	-0.35539	0.723156	0.931586	-0.00399585	-0.0551904	0.956113	0.984048	-0.000292963	-0.238928	0.811722	0.906845
NVEC200_000494_1.1	5.89994	-0.168329	-2.62438	0.0102489	0.0901934	0.173727	2.74941	0.0072575	0.0927482	0.00269938	0.0595111	0.952681	0.991437	0.0161557	2.2707	0.0256296	0.111497	-0.0500739	-1.12353	0.264297	0.716961	0.342056	3.82828	0.000242416	0.00401653	-0.00626056	-4.13963	8.00746e-05	0.00159811
NVEC200_000495_1.1	1.93583	0.18892	1.101	0.273928	0.572744	0.11142	0.661276	0.510179	0.794253	0.15017	1.23747	0.219235	0.662229	0.0131605	0.69533	0.488698	0.70163	-0.084568	-0.713971	0.477153	0.845176	-0.0775001	-0.325297	0.745735	0.888144	0.00320777	0.817937	0.415624	0.636956
NVEC200_000496_1.1	5.61923	0.0255329	0.344826	0.731056	0.885708	0.149213	2.06926	0.0414829	0.235671	0.0873731	1.66817	0.098871	0.531368	0.019458	2.39927	0.0185583	0.0896839	0.0586466	1.15436	0.251508	0.707238	0.12368	1.21326	0.228308	0.494547	-0.00932965	-5.42801	5.06238e-07	3.03595e-05
NVEC200_000497_1.1	5.58954	-0.203534	-3.10323	0.0025807	0.0356485	0.199889	3.0747	0.0028137	0.0532642	-0.00182282	-0.0393022	0.968739	0.994538	-0.0153433	-2.09496	0.0390765	0.148411	-0.126397	-2.76676	0.00691231	0.208667	0.403423	4.38811	3.19205e-05	0.000805812	0.00269975	1.73866	0.0856258	0.245672
NVEC200_000498_1.1	4.83721	0.262626	1.79115	0.0772738	0.294514	-0.0903171	-0.632753	0.528805	0.801421	0.0861542	0.83067	0.408777	0.800621	-0.0405473	-2.51899	0.0138822	0.0741067	-0.0343269	-0.34431	0.731569	0.93418	-0.352943	-1.74912	0.0843308	0.27348	-0.00867536	-2.55838	0.012517	0.069852
NVEC200_000500_1.1	2.33502	-0.0509615	-0.271808	0.786412	0.909881	-0.113459	-0.635947	0.526478	0.800064	-0.0822101	-0.619332	0.537313	0.858716	0.0177455	0.880656	0.380926	0.611775	0.0909418	0.722558	0.471886	0.841872	-0.0624971	-0.24804	0.804687	0.915608	-0.0043055	-1.01423	0.313279	0.542773
NVEC200_000501_1.1	2.63888	-0.140962	-0.831935	0.407719	0.687868	0.121947	0.747439	0.45681	0.761288	-0.00950714	-0.0792945	0.93698	0.988301	-0.000247953	-0.0134639	0.989288	0.995279	0.05793	0.507124	0.613348	0.901004	0.262909	1.14033	0.257274	0.527044	0.000440551	0.114264	0.909291	0.956191
NVEC200_000503_1.1	2.66987	0.0436918	0.27472	0.784181	0.908966	-0.0841666	-0.552395	0.582092	0.83183	-0.0202374	-0.179788	0.857736	0.970845	0.00456037	0.265068	0.791583	0.897249	0.0197351	0.184312	0.854197	0.970148	-0.127858	-0.593964	0.554074	0.777129	-0.00677421	-1.86754	0.0651862	0.206096
NVEC200_000504_1.1	6.28697	0.0101964	0.186528	0.852464	0.940265	-0.0220047	-0.408507	0.683903	0.883554	-0.00590418	-0.152731	0.878964	0.97705	-0.00156251	-0.257947	0.797056	0.900747	-0.0520927	-1.37164	0.173695	0.635184	-0.0322011	-0.422754	0.673516	0.850179	0.00320456	2.48624	0.0148169	0.0784491
NVEC200_000505_1.1	5.16175	0.362707	4.22341	5.89249e-05	0.00218335	-0.188775	-2.22868	0.0284075	0.190012	0.0869659	1.43196	0.155732	0.608573	0.00744829	0.782962	0.435772	0.659857	-0.129408	-2.16361	0.0332302	0.381271	-0.551482	-4.60429	1.40002e-05	0.000411768	0.00404798	2.01494	0.0469921	0.168089
NVEC200_000506_1.1	3.86762	-0.134621	-1.24493	0.216494	0.509824	0.0742102	0.703974	0.483326	0.778225	-0.0302053	-0.394903	0.693879	0.916171	0.013339	1.12106	0.265342	0.495371	-0.0405321	-0.545486	0.586812	0.888882	0.208831	1.40127	0.164684	0.407821	0.00378872	1.51287	0.133929	0.322972
NVEC200_000507_1.1	6.7037	0.298424	1.81499	0.0736746	0.286696	0.280005	1.75359	0.0837396	0.342366	0.289215	2.4865	0.0152114	0.329082	-0.0268802	-1.50356	0.13705	0.332261	0.253127	2.26433	0.0265541	0.350854	-0.018419	-0.0816037	0.935187	0.975327	-0.0131268	-3.45656	0.000920005	0.0106003
NVEC200_000508_1.1	3.16473	0.108445	0.872237	0.385476	0.671453	0.0993304	0.822685	0.412932	0.730864	0.103888	1.18118	0.240742	0.682505	0.00614282	0.451359	0.652852	0.817034	-0.0324541	-0.38244	0.703066	0.926121	-0.00911432	-0.0534022	0.957534	0.984274	-0.00405735	-1.4235	0.158161	0.357516
NVEC200_000509_1.1	4.69356	0.115621	1.24766	0.215498	0.508997	0.181122	2.01533	0.0469507	0.252301	0.148371	2.26319	0.0261082	0.386165	0.0410404	4.05943	0.000107038	0.00201806	0.0661071	1.03849	0.301916	0.742028	0.065501	0.515616	0.607428	0.812238	-0.00493546	-2.32499	0.0223962	0.103472
NVEC200_000510_1.1	4.6327	0.190067	1.73138	0.0869211	0.315362	-0.00109743	-0.0104119	0.991716	0.996964	0.0944848	1.2162	0.227193	0.673231	-0.025436	-2.14491	0.0347423	0.13715	0.113926	1.5492	0.124958	0.574293	-0.191164	-1.28362	0.202677	0.459692	-0.0105353	-4.21144	6.15783e-05	0.00128968
NVEC200_000511_1.1	3.76814	-0.0184629	-0.178305	0.858897	0.943045	-0.136526	-1.3806	0.170933	0.488062	-0.0774946	-1.05728	0.293305	0.726548	0.0175887	1.57697	0.118425	0.302372	0.0977222	1.40421	0.16381	0.625368	-0.118063	-0.845194	0.400316	0.667644	-0.00509182	-2.15578	0.0338563	0.135747
NVEC200_000512_1.1	2.17202	0.0902389	0.454178	0.65083	0.843663	-0.401707	-2.05971	0.0424087	0.238723	-0.155734	-1.10829	0.270783	0.708752	0.0371011	1.68033	0.0964738	0.265039	-0.104814	-0.75326	0.453323	0.833651	-0.491945	-1.78393	0.0779149	0.261789	0.00297165	0.634012	0.527734	0.726454
NVEC200_000513_1.1	5.04843	0.0011298	0.0146869	0.988316	0.995137	0.0464027	0.615763	0.539655	0.808106	0.0237662	0.436827	0.663317	0.904802	-0.0119112	-1.40238	0.164353	0.370949	-0.0171217	-0.323496	0.747094	0.938266	0.0452729	0.424903	0.671954	0.849811	0.00288089	1.60596	0.111901	0.289434
NVEC200_000514_1.1	5.67174	-0.194244	-2.3177	0.0228081	0.147736	0.0712403	0.871512	0.385869	0.710885	-0.0615019	-1.03748	0.302383	0.733001	0.0105491	1.14627	0.25482	0.485097	0.0479343	0.8331	0.407065	0.811766	0.265484	2.29728	0.0239985	0.118922	-0.000178948	-0.0915188	0.92729	0.965783
NVEC200_000515_1.1	4.38523	-0.0990457	-0.836783	0.405003	0.685733	-0.0584029	-0.507132	0.613343	0.84912	-0.0787243	-0.940238	0.349694	0.764138	-0.00712444	-0.547738	0.585271	0.770085	-0.0254661	-0.314968	0.753538	0.938913	0.0406428	0.249647	0.803447	0.914957	0.00246426	0.896005	0.372718	0.599328
NVEC200_000518_1.1	2.92659	0.356693	2.62791	0.010151	0.0894598	-0.142861	-1.07918	0.283483	0.621926	0.106916	1.11362	0.268504	0.706859	-0.033033	-2.21092	0.0296587	0.123015	-0.101225	-1.09592	0.276132	0.725252	-0.499554	-2.66927	0.00906571	0.0596968	-0.0074956	-2.3885	0.0190755	0.0930178
NVEC200_000519_1.1	3.58548	0.10541	0.825174	0.411525	0.689747	0.102954	0.847248	0.399177	0.720936	0.104182	1.15194	0.252496	0.693673	-0.00348433	-0.255508	0.798932	0.901796	0.15808	1.86668	0.0653081	0.471738	-0.00245539	-0.0143078	0.988617	0.995655	-0.000996352	-0.349669	0.72743	0.859803
NVEC200_000520_1.1	6.33767	0.0179968	0.283451	0.777503	0.906718	-0.0160361	-0.258267	0.79681	0.933525	0.000980322	0.0218302	0.982633	0.996196	0.00462005	0.661938	0.509757	0.718447	0.0670073	1.53245	0.129032	0.578759	-0.0340329	-0.387673	0.699203	0.863697	-0.0050299	-3.38509	0.00106855	0.0117717
NVEC200_000522_1.1	5.13252	-0.0740266	-1.02535	0.308037	0.602067	-0.0414882	-0.585476	0.559741	0.817836	-0.0577574	-1.13118	0.261084	0.702076	0.00457958	0.572824	0.568239	0.757939	-0.0545063	-1.09137	0.278117	0.725783	0.0325384	0.324747	0.746151	0.888355	-0.00259786	-1.5317	0.129217	0.316019
NVEC200_000523_1.1	3.21479	-0.054127	-0.388096	0.698892	0.868686	0.0516386	0.386648	0.699959	0.891512	-0.00124421	-0.0126045	0.989972	0.996996	0.00503346	0.334254	0.73899	0.868676	0.095326	1.01975	0.310668	0.749186	0.105766	0.560554	0.57654	0.790967	-0.00105303	-0.333033	0.739909	0.867506
NVEC200_000524_1.1	3.78449	-0.146184	-1.04027	0.301093	0.596187	-0.196752	-1.43487	0.154902	0.467329	-0.171468	-1.72509	0.0880555	0.518197	-0.00252463	-0.162661	0.871162	0.941785	-0.0645347	-0.669125	0.505184	0.857126	-0.0505674	-0.260848	0.794825	0.91184	-0.000838817	-0.254254	0.799898	0.901453
NVEC200_000525_1.1	7.41647	0.235909	5.56246	2.87569e-07	2.94615e-05	-0.236175	-5.6426	2.0472e-07	5.13637e-05	-0.00013315	-0.00443956	0.996468	0.998898	-0.0136115	-2.89977	0.00472481	0.0340806	-0.0259234	-0.879164	0.38173	0.797426	-0.472084	-7.97605	5.47528e-12	1.20037e-09	0.000678466	0.677165	0.500095	0.705538
NVEC200_000526_1.1	3.1628	-0.0661564	-0.46601	0.642371	0.838083	-0.30384	-2.2206	0.0289713	0.191594	-0.184998	-1.84167	0.0689246	0.478726	0.0181904	1.17563	0.242943	0.471468	0.0544157	0.563012	0.574872	0.885133	-0.237684	-1.22921	0.222299	0.486049	0.000580457	0.176768	0.8601	0.931158
NVEC200_000527_1.1	2.20738	-0.0532275	-0.277078	0.782376	0.908094	-0.00710527	-0.0376439	0.970058	0.99044	-0.0301664	-0.222043	0.8248	0.964115	0.00161424	0.0756067	0.939905	0.97266	-0.0793747	-0.596187	0.552596	0.879562	0.0461223	0.172814	0.863198	0.944684	-0.000222019	-0.0495566	0.960589	0.981343
NVEC200_000528_1.1	6.15924	0.100074	1.51188	0.134181	0.397785	0.0297814	0.456425	0.64922	0.865204	0.0649279	1.38707	0.168958	0.620131	-0.0108234	-1.475	0.143815	0.342184	-0.0666188	-1.45032	0.150558	0.610072	-0.070293	-0.761848	0.448207	0.706353	-0.00133774	-0.858862	0.392773	0.616698
NVEC200_000529_1.1	6.15813	0.541546	6.22072	1.79566e-08	3.1994e-06	-0.336483	-3.94733	0.000162389	0.0078599	0.102532	1.66526	0.0995467	0.533258	-0.0319835	-3.34793	0.0012153	0.0128579	-0.0220982	-0.369564	0.712627	0.929173	-0.878029	-7.28508	1.52673e-10	2.15743e-08	-0.000541948	-0.267754	0.789538	0.895937
NVEC200_000530_1.1	6.91039	0.00650767	0.116258	0.907715	0.962999	-0.139207	-2.50821	0.013986	0.130794	-0.0663495	-1.67624	0.0972748	0.530622	-0.0271828	-4.35739	3.58219e-05	0.000856799	-0.139134	-3.55822	0.000606819	0.0667486	-0.145714	-1.85655	0.066753	0.23707	0.00245299	1.84292	0.0687397	0.21327
NVEC200_000531_1.1	3.32602	0.151985	1.11061	0.269789	0.568429	0.0555024	0.416037	0.678405	0.880523	0.103744	1.07176	0.286786	0.720464	-0.0618705	-4.08465	9.7735e-05	0.00188627	-0.0614146	-0.662257	0.509553	0.858579	-0.0964828	-0.511569	0.610246	0.814059	0.00379515	1.20462	0.23161	0.450591
NVEC200_000532_1.1	9.73573	0.109323	2.26051	0.0262802	0.160705	0.0116963	0.244941	0.807078	0.937025	0.0605098	1.76929	0.0803422	0.502618	-0.0215151	-4.02089	0.000122909	0.00221886	0.0644628	1.91759	0.0584372	0.457797	-0.097627	-1.44578	0.151824	0.389264	6.29299e-05	0.0550562	0.95622	0.979469
NVEC200_000533_1.1	4.57586	-0.119324	-1.34417	0.18238	0.467776	0.0197348	0.229897	0.818711	0.941291	-0.0497948	-0.79283	0.430029	0.80956	0.00689532	0.712505	0.478055	0.693722	0.0627909	1.04122	0.300651	0.740397	0.139059	1.14617	0.254863	0.523874	0.00260932	1.27561	0.205483	0.419078
NVEC200_000534_1.1	1.99211	-0.291967	-1.34359	0.182568	0.467882	0.31976	1.54348	0.126338	0.422834	0.013896	0.0903321	0.928231	0.987529	0.0620276	2.6666	0.00913248	0.0545023	0.192081	1.30748	0.194487	0.653294	0.611727	2.09058	0.0394776	0.167415	0.00250994	0.523161	0.602189	0.778886
NVEC200_000535_1.1	4.69396	-0.0623531	-0.683818	0.495904	0.750818	0.114996	1.29281	0.199492	0.526413	0.0263216	0.408109	0.684194	0.913894	-0.0111131	-1.10803	0.270898	0.501267	-0.00431726	-0.0692786	0.944927	0.990136	0.177349	1.41028	0.162014	0.403608	-0.00459198	-2.16934	0.0327785	0.13261
NVEC200_000536_1.1	4.70166	0.00170192	0.0206024	0.98361	0.993106	0.117606	1.46552	0.146376	0.454173	0.059654	1.02082	0.310162	0.739745	-0.0215663	-2.3846	0.0192662	0.0919036	0.0226046	0.402983	0.687947	0.922378	0.115904	1.02174	0.309731	0.579956	-0.000384139	-0.20175	0.840582	0.9212
NVEC200_000537_1.1	1.40009	-0.0216121	-0.083062	0.933993	0.974663	-0.356238	-1.45322	0.149753	0.460065	-0.188925	-1.02503	0.308186	0.737777	-0.0276703	-1.00121	0.319495	0.552599	0.114507	0.67559	0.50109	0.855576	-0.334626	-0.96719	0.336125	0.606659	-0.00517395	-0.881636	0.380398	0.605622
NVEC200_000538_1.1	4.9732	0.021475	0.239369	0.811381	0.922725	0.221679	2.4996	0.0143065	0.132443	0.121577	1.91634	0.0585986	0.461781	-0.0238334	-2.38586	0.0192046	0.0916898	-0.115674	-1.86138	0.0660611	0.472925	0.200204	1.59637	0.114026	0.331638	0.00341731	1.62629	0.107498	0.282105
NVEC200_000541_1.1	4.41737	-0.0981089	-0.642532	0.522428	0.76607	0.204734	1.37768	0.172276	0.488861	0.0533127	0.493597	0.62299	0.891998	0.000446315	0.0266608	0.978799	0.991134	0.00920143	0.0883515	0.929826	0.988352	0.302843	1.44155	0.153467	0.391598	-0.00681894	-1.93232	0.0569815	0.188938
NVEC200_000542_1.1	5.70748	0.132728	1.90269	0.0603829	0.25776	0.0706123	1.03896	0.301695	0.639407	0.10167	2.06046	0.0423354	0.42246	0.0044239	0.579025	0.564066	0.75545	0.0554402	1.15955	0.249397	0.706473	-0.0621161	-0.646494	0.519658	0.753446	-0.0090799	-5.60609	2.39058e-07	1.69883e-05
NVEC200_000543_1.1	4.9664	-0.160078	-2.14232	0.0349562	0.189151	0.117419	1.60586	0.111922	0.398717	-0.0213293	-0.403592	0.687501	0.91446	0.023698	2.87516	0.005074	0.0357272	-0.0136174	-0.263631	0.792686	0.950712	0.277497	2.68422	0.00870015	0.0577848	0.00260348	1.49369	0.138868	0.330031
NVEC200_000544_1.1	4.93343	-0.133386	-1.62206	0.108403	0.35691	0.334539	4.25519	5.24048e-05	0.00364441	0.100576	1.72793	0.0875418	0.51709	-0.0108702	-1.23362	0.220662	0.444796	0.217482	3.98248	0.00014096	0.0291041	0.467925	4.21324	6.11723e-05	0.00133107	-0.0036932	-1.99137	0.0495719	0.173472
NVEC200_000545_1.1	3.86865	0.0029216	0.021965	0.982526	0.992812	0.0433396	0.341078	0.733866	0.908026	0.0231306	0.245673	0.806513	0.958738	0.0160384	1.12139	0.265203	0.495342	0.121725	1.36421	0.176013	0.638509	0.040418	0.225179	0.822367	0.924064	-0.00181881	-0.604551	0.547048	0.740032
NVEC200_000546_1.1	9.31534	0.0449316	0.892151	0.374768	0.664273	0.119277	2.39848	0.0185958	0.151592	0.0821042	2.30532	0.0235232	0.373506	-0.0167032	-2.99758	0.00354484	0.0278824	0.0795982	2.27344	0.0254569	0.343166	0.0743452	1.05719	0.293346	0.563587	-0.00158445	-1.33128	0.186568	0.394982
NVEC200_000547_1.1	4.05989	-0.00524246	-0.0374078	0.970248	0.989074	-0.0365658	-0.267943	0.789396	0.930898	-0.0209042	-0.210873	0.833494	0.965761	-0.0194543	-1.26131	0.210671	0.430864	0.000843682	0.00883368	0.992973	0.999586	-0.0313234	-0.162361	0.871409	0.94872	-0.00190935	-0.587383	0.558513	0.748215
NVEC200_000549_1.1	5.01137	-0.0388907	-0.509193	0.611903	0.822697	-0.0256466	-0.342505	0.732795	0.907536	-0.0322686	-0.597376	0.551805	0.864741	-0.00799444	-0.946405	0.346558	0.580542	-0.0516897	-0.981204	0.329208	0.760767	0.013244	0.125093	0.900738	0.961758	0.00535326	2.99287	0.00359474	0.0289985
NVEC200_000550_1.1	6.35331	0.234651	2.47529	0.0154466	0.115722	-0.229981	-2.44675	0.0166286	0.142447	0.00233502	0.0348332	0.9723	0.9946	-0.0399221	-3.77605	0.000306528	0.00452939	-0.162183	-2.45322	0.0163539	0.295809	-0.464631	-3.49549	0.000778136	0.00972195	0.00628011	2.79446	0.0065178	0.0443441
NVEC200_000551_1.1	7.45783	0.268044	5.80955	1.00214e-07	1.29206e-05	-0.209889	-4.60497	1.39637e-05	0.00137336	0.0290771	0.891191	0.37528	0.778067	-0.0205783	-4.02646	0.000120483	0.00219116	-0.0490691	-1.5286	0.129984	0.580465	-0.477933	-7.41517	7.45103e-11	1.2053e-08	0.00369511	3.38821	0.0010579	0.0117064
NVEC200_000552_1.1	9.15724	-0.0269885	-0.745558	0.45794	0.724028	0.0616773	1.72505	0.0880616	0.351275	0.0173444	0.677553	0.499849	0.84359	-0.013441	-3.35464	0.00117817	0.0126502	0.0725806	2.88278	0.00496335	0.184958	0.0886658	1.75369	0.0829987	0.271888	-0.00167859	-1.96045	0.0531365	0.181562
NVEC200_000553_1.1	5.22333	0.122772	1.2402	0.218235	0.511628	-0.206805	-2.14354	0.034859	0.213957	-0.0420163	-0.600039	0.550039	0.863845	-0.022531	-2.07214	0.0412108	0.153669	-0.0106999	-0.158126	0.874724	0.975562	-0.329577	-2.41638	0.0177648	0.096424	-0.00050579	-0.219528	0.826753	0.91486
NVEC200_000554_1.1	1.87593	0.438493	2.09832	0.0387707	0.202207	-0.088339	-0.441537	0.659918	0.869896	0.175077	1.1837	0.239751	0.68161	-0.0457516	-2.03674	0.0447107	0.162002	0.00127839	0.00925638	0.992636	0.999586	-0.526832	-1.8639	0.0657024	0.234946	-0.00912438	-1.95205	0.0541427	0.183622
NVEC200_000555_1.1	6.57977	-0.0658793	-1.13688	0.258705	0.556326	0.0205022	0.358452	0.720872	0.903681	-0.0226885	-0.553668	0.581224	0.877205	-0.00246784	-0.383772	0.702082	0.84933	-0.0553134	-1.37172	0.173671	0.635184	0.0863816	1.068	0.288467	0.558373	0.000453408	0.330943	0.741482	0.868417
NVEC200_000556_1.1	5.8732	-0.174185	-2.52766	0.0132853	0.105526	0.0715508	1.05827	0.292855	0.630866	-0.0513173	-1.05295	0.295275	0.727477	-0.0172067	-2.25858	0.0264055	0.113666	-0.0183998	-0.387666	0.699208	0.924629	0.245736	2.57051	0.0118521	0.0720263	-0.00210256	-1.29791	0.197743	0.408718
NVEC200_000557_1.1	8.61777	0.117155	2.30107	0.0237735	0.151514	0.025325	0.503244	0.616062	0.851061	0.0712398	1.97869	0.0510075	0.448099	-0.00644365	-1.14286	0.256225	0.486227	0.0375511	1.0592	0.292434	0.734461	-0.0918296	-1.29041	0.20032	0.456401	-0.00658452	-5.46467	4.34156e-07	2.64234e-05
NVEC200_000558_1.1	5.09211	0.110165	1.39224	0.16739	0.447272	-0.0515136	-0.664232	0.508295	0.793127	0.0293256	0.524018	0.601596	0.883704	0.00578771	0.662452	0.509429	0.718147	-0.0632949	-1.1573	0.25031	0.70707	-0.161678	-1.47444	0.143967	0.378697	-0.00174539	-0.944594	0.347477	0.575726
NVEC200_000561_1.1	4.2115	-0.0499249	-0.485965	0.628212	0.830098	0.017448	0.174307	0.862028	0.957774	-0.0162385	-0.223461	0.8237	0.964046	-0.010177	-0.900587	0.370289	0.601802	-0.0219639	-0.312584	0.755344	0.939233	0.0673729	0.476097	0.635196	0.829432	0.00110987	0.466019	0.642365	0.806663
NVEC200_000562_1.1	6.77025	0.110943	2.03145	0.0452553	0.220781	0.0481788	0.897866	0.37173	0.701085	0.079561	2.05993	0.0423874	0.422637	0.00171163	0.284096	0.77701	0.889763	0.0350382	0.926833	0.356572	0.78099	-0.0627645	-0.827227	0.410367	0.675557	-0.0103839	-8.08955	3.21752e-12	1.79801e-09
NVEC200_000563_1.1	3.23834	0.330397	2.68852	0.00859749	0.0805621	-0.14432	-1.18412	0.239586	0.572825	0.0930389	1.07063	0.28729	0.721123	-0.0561078	-4.06365	0.000105425	0.00199707	-0.176559	-2.0782	0.0406311	0.411271	-0.474717	-2.75425	0.00715956	0.0502395	-0.00110109	-0.382126	0.703298	0.842972
NVEC200_000564_1.1	3.69615	0.0924955	0.866063	0.388833	0.673479	0.136407	1.31955	0.190441	0.514566	0.114451	1.51472	0.13346	0.582656	-0.0117877	-1.01242	0.314138	0.547726	0.0135552	0.18796	0.851345	0.969531	0.0439115	0.300538	0.764482	0.896533	-0.00815184	-3.33548	0.00125246	0.0132624
NVEC200_000565_1.1	4.88579	-0.138449	-1.4787	0.142825	0.41016	0.380965	4.17426	7.05714e-05	0.0044221	0.121258	1.83095	0.0705254	0.481691	0.0317322	3.09402	0.00265387	0.022689	0.0317202	0.493816	0.622678	0.903894	0.519414	4.0257	0.000120811	0.00228499	-0.00638149	-2.95479	0.00402282	0.0314609
NVEC200_000566_1.1	5.15265	0.256014	3.23912	0.00169756	0.0273166	-0.25196	-3.22774	0.00175896	0.0394611	0.00202707	0.0362672	0.971152	0.9946	-0.0429769	-4.88001	4.74845e-06	0.000171684	-0.132424	-2.41904	0.0176406	0.303783	-0.507973	-4.6018	1.41357e-05	0.000413772	0.0053676	2.88357	0.00495215	0.0364125
NVEC200_000567_1.1	4.73894	-0.115507	-1.42613	0.157402	0.432497	0.217671	2.73491	0.007558	0.0947177	0.0510819	0.891801	0.374955	0.778067	0.0215499	2.40259	0.0184012	0.0891702	-0.0645083	-1.14899	0.253705	0.708214	0.333177	2.96055	0.00395511	0.0326118	-0.00418814	-2.21228	0.0295612	0.123909
NVEC200_000568_1.1	4.57953	-0.114743	-1.27704	0.20498	0.496165	-0.0204548	-0.236215	0.81382	0.938795	-0.0675987	-1.06325	0.290604	0.723363	0.019637	2.01141	0.0473717	0.168466	0.101476	1.66507	0.0994903	0.538114	0.0942877	0.7705	0.443086	0.702969	-0.00385967	-1.86765	0.0651711	0.206096
NVEC200_000569_1.1	6.24356	0.104606	1.54579	0.125779	0.384338	0.0600061	0.911022	0.364796	0.695705	0.0823058	1.71942	0.0890868	0.518933	-0.0132498	-1.79217	0.0765755	0.227849	0.128703	2.78404	0.0065834	0.20653	-0.0445994	-0.478978	0.633154	0.827864	0.00392433	2.49928	0.0143186	0.0766556
NVEC200_000570_1.1	3.97189	0.12691	1.06992	0.287607	0.58492	-0.0777404	-0.685011	0.495154	0.785592	0.0245845	0.292827	0.77035	0.943668	-0.0194918	-1.52501	0.130877	0.321478	0.103817	1.31311	0.192591	0.652118	-0.20465	-1.27648	0.205178	0.463091	0.00149894	0.558681	0.577812	0.761267
NVEC200_000571_1.1	6.38107	0.127298	1.43988	0.153715	0.42726	-0.347008	-3.97012	0.000153556	0.0075816	-0.109855	-1.75717	0.0826287	0.505136	-0.0409745	-4.16472	7.67343e-05	0.00155415	-0.114618	-1.86481	0.0657926	0.472738	-0.474306	-3.83739	0.000243743	0.00402766	0.00372573	1.77721	0.079249	0.233642
NVEC200_000572_1.1	5.99973	-0.0231995	-0.364778	0.71616	0.877639	0.101727	1.63982	0.104647	0.384797	0.0392637	0.872813	0.385163	0.784362	0.00727433	1.0427	0.29997	0.532616	0.0792523	1.81564	0.072864	0.488409	0.124927	1.42443	0.157892	0.397637	-0.00889319	-5.99696	4.45183e-08	4.72126e-06
NVEC200_000573_1.1	5.59611	-0.0460806	-0.704591	0.482943	0.741957	-0.012324	-0.192765	0.847592	0.952756	-0.0292023	-0.631305	0.529493	0.855249	0.00582334	0.809095	0.420664	0.646987	0.00867741	0.192588	0.847729	0.969346	0.0337565	0.373451	0.709719	0.868551	0.00363461	2.37887	0.019549	0.0945235
NVEC200_000574_1.1	8.5931	0.254203	3.27896	0.00154417	0.0255504	0.176619	2.30172	0.0239544	0.172532	0.215411	3.9293	0.00017997	0.070475	-0.0230094	-2.67732	0.00900337	0.0539938	-0.0269951	-0.499498	0.618801	0.902056	-0.0775839	-0.714983	0.476703	0.726502	0.0020208	1.1015	0.273985	0.50147
NVEC200_000575_1.1	6.58974	0.0915587	0.991681	0.324365	0.617076	0.10321	1.13842	0.258369	0.595386	0.0973845	1.49144	0.139808	0.590891	-0.0175093	-1.71978	0.0893669	0.251875	0.0311198	0.488277	0.626699	0.904037	0.0116516	0.0908915	0.927808	0.972999	-0.00145877	-0.673805	0.502392	0.707654
NVEC200_000576_1.1	7.23281	-0.114325	-1.85087	0.0675752	0.272741	0.157473	2.5915	0.0112023	0.116475	0.0215737	0.493873	0.622638	0.891876	-0.0171751	-2.51751	0.013647	0.0732326	0.0825085	1.93056	0.0567888	0.454177	0.271798	3.16327	0.00214776	0.0211744	-0.00933856	-6.41164	7.15795e-09	1.09279e-06
NVEC200_000578_1.1	-0.686155	0.83656	0.98808	0.326289	0.61883	0.0147963	0.0184657	0.985316	0.995245	0.425678	0.709955	0.479933	0.833006	0.0584286	0.652249	0.516234	0.723399	0.0245262	0.042529	0.96619	0.995985	-0.821764	-0.726416	0.469844	0.722846	0.0374247	2.00776	0.0482693	0.171168
NVEC200_000579_1.1	4.41332	-0.165083	-1.49718	0.137959	0.403231	0.12159	1.12464	0.263829	0.600156	-0.0217467	-0.278866	0.781008	0.948952	0.0166993	1.36857	0.174652	0.385143	-0.0804329	-1.05485	0.294408	0.736109	0.286673	1.87532	0.0640965	0.231162	0.000636226	0.24686	0.805597	0.903898
NVEC200_000580_1.1	3.32552	-0.220734	-1.74364	0.0847477	0.310732	0.179774	1.40897	0.162402	0.477078	-0.0204802	-0.228782	0.819574	0.96365	-0.0344867	-2.39154	0.0189284	0.090865	-0.288293	-3.2399	0.00169341	0.109829	0.400508	2.21965	0.0290383	0.135299	0.000743519	0.245612	0.80656	0.904565
NVEC200_000581_1.1	3.4688	-0.450966	-3.36422	0.0011426	0.0207491	-0.118194	-0.917138	0.361601	0.692881	-0.28458	-3.00001	0.00351934	0.215258	0.0208451	1.43295	0.155449	0.357882	0.042045	0.465325	0.642859	0.909521	0.332772	1.82741	0.0710603	0.247764	0.00257297	0.831837	0.407774	0.629875
NVEC200_000582_1.1	5.96889	-0.022563	-0.368058	0.713723	0.875936	0.00361683	0.0599854	0.952305	0.986708	-0.00947308	-0.218507	0.827545	0.964294	-0.0197753	-2.91273	0.00454995	0.0334225	-0.0480037	-1.13261	0.260485	0.713768	0.0261798	0.307065	0.759526	0.895265	0.000344476	0.238873	0.811765	0.906845
NVEC200_000583_1.1	5.07509	0.152682	2.01451	0.047038	0.224926	-0.110965	-1.51317	0.133853	0.435687	0.0208589	0.389001	0.698224	0.917188	-0.0332768	-4.02758	0.000120001	0.00219107	0.062436	1.21809	0.226477	0.685285	-0.263647	-2.54369	0.0127318	0.0756158	-0.00337727	-1.93411	0.0563438	0.187823
NVEC200_000584_1.1	5.12928	-0.0684778	-0.837122	0.404813	0.6856	0.23488	2.94239	0.00417203	0.0671829	0.0832011	1.43798	0.15402	0.606119	-0.00601228	-0.669137	0.505177	0.714606	0.00805914	0.144115	0.885742	0.977019	0.303358	2.68801	0.00860954	0.0574952	-0.00995705	-5.2391	1.10899e-06	5.58767e-05
NVEC200_000585_1.1	5.3129	-0.0731271	-0.808046	0.421264	0.697235	-0.169402	-1.89841	0.0609514	0.289655	-0.121265	-1.8948	0.061434	0.465905	0.0200168	1.98826	0.0499208	0.173963	-0.0872363	-1.37976	0.17119	0.631069	-0.0962749	-0.762979	0.447536	0.706069	0.00329909	1.54125	0.126879	0.31316
NVEC200_000586_1.1	7.12542	0.142321	2.31387	0.0230276	0.148775	-0.169325	-2.79278	0.00642246	0.086387	-0.013502	-0.310411	0.756989	0.937297	-0.000413057	-0.060724	0.951718	0.978214	-0.00763161	-0.178551	0.858705	0.97115	-0.311647	-3.63504	0.000469415	0.00661811	0.00215762	1.48653	0.140747	0.332374
NVEC200_000587_1.1	1.77499	-0.165879	-0.676906	0.500258	0.753112	0.675066	2.82619	0.00584029	0.0815274	0.254593	1.46878	0.145492	0.596028	-0.00611735	-0.2315	0.817469	0.913384	-0.00734468	-0.0449064	0.964285	0.995541	0.840945	2.49033	0.0146589	0.0838604	0.00858903	1.59992	0.113235	0.291969
NVEC200_000589_1.1	5.91494	-0.227545	-2.43767	0.0168992	0.121925	0.0600901	0.663224	0.50901	0.79383	-0.0837275	-1.26794	0.208336	0.653388	-0.00071089	-0.0697225	0.944581	0.9743	0.119612	1.88149	0.0633812	0.465477	0.287635	2.2459	0.0273453	0.130404	-0.00656108	-3.02051	0.00334591	0.0274597
NVEC200_000590_1.1	5.58604	0.148323	1.98602	0.0501735	0.234359	0.0775974	1.05736	0.293269	0.631428	0.11296	2.1387	0.0352575	0.405445	-0.0199682	-2.41937	0.0176256	0.0869188	-0.0546976	-1.06116	0.291549	0.734049	-0.0707252	-0.681558	0.497325	0.740566	-0.000750574	-0.430415	0.667956	0.820857
NVEC200_000591_1.1	7.6826	-0.24622	-3.0775	0.00285065	0.0378874	-0.0308455	-0.389947	0.697602	0.890677	-0.138533	-2.44858	0.0165085	0.336312	0.0116723	1.3147	0.192334	0.407751	-0.0335095	-0.600342	0.54996	0.878764	0.215374	1.9254	0.0577002	0.214961	0.00503311	2.64972	0.00968963	0.057968
NVEC200_000592_1.1	4.0963	0.215224	2.16281	0.0332943	0.184125	-0.0269468	-0.281516	0.778982	0.926817	0.0941387	1.33685	0.184752	0.632508	-0.00840697	-0.780327	0.437312	0.6604	0.0462442	0.689896	0.492092	0.851362	-0.242171	-1.79044	0.0768554	0.259335	-0.0131506	-5.77748	1.15028e-07	9.58042e-06
NVEC200_000593_1.1	4.97008	-0.0216079	-0.218721	0.827378	0.92961	0.0758433	0.811557	0.419256	0.735494	0.0271177	0.387591	0.699264	0.917769	-0.0196479	-1.87527	0.0641029	0.204537	0.295197	4.55244	1.70936e-05	0.00972872	0.0974512	0.738631	0.462115	0.717601	-0.00364389	-1.64627	0.10331	0.275668
NVEC200_000594_1.1	4.16766	0.0667196	0.771905	0.442258	0.714283	-0.0447108	-0.5339	0.59477	0.839551	0.0110044	0.179959	0.857602	0.970845	-0.0301904	-3.19248	0.00196259	0.0180207	0.0156293	0.26741	0.789785	0.94933	-0.11143	-0.941386	0.349109	0.619775	0.00212591	1.07067	0.287274	0.515885
NVEC200_000595_1.1	5.49314	0.161216	2.09604	0.0389781	0.202577	-0.0712439	-0.951497	0.343983	0.677335	0.0449863	0.826851	0.410579	0.801216	-0.00768838	-0.913204	0.363654	0.596819	0.0452778	0.860397	0.391931	0.803261	-0.23246	-2.19614	0.0307373	0.140686	0.00017444	0.0978458	0.922279	0.963421
NVEC200_000596_1.1	3.81018	-0.185461	-1.58373	0.116878	0.370525	0.291679	2.51122	0.0138756	0.130617	0.0531091	0.641353	0.522976	0.852828	0.0111169	0.850391	0.397437	0.626101	-0.121112	-1.48218	0.1419	0.596659	0.47714	2.90485	0.00465552	0.0368308	0.006751	2.46293	0.0157469	0.0818919
NVEC200_000597_1.1	6.87466	-0.0543719	-0.5476	0.585564	0.806359	0.0415971	0.428288	0.669647	0.875066	-0.0063874	-0.0909541	0.927767	0.987529	-0.0145249	-1.33209	0.186792	0.401332	0.145039	2.12511	0.036812	0.398976	0.095969	0.698875	0.486753	0.732453	-0.0044261	-1.90276	0.0608411	0.197858
NVEC200_000598_1.1	7.55163	0.304909	2.92472	0.00456847	0.053467	0.0838962	0.825059	0.411978	0.730122	0.194403	2.63631	0.0101983	0.305055	-0.00593032	-0.520754	0.604086	0.782871	0.327286	4.58181	1.82008e-05	0.00972872	-0.221013	-1.5374	0.128441	0.354842	-0.0310323	-12.7286	2.3572e-20	1.44897e-16
NVEC200_000599_1.1	4.7744	-0.237096	-2.71314	0.00803067	0.0770117	0.060448	0.713538	0.477419	0.775865	-0.0883242	-1.42867	0.156673	0.608764	0.022995	2.40763	0.0181654	0.0885507	0.0558596	0.935648	0.352039	0.77768	0.297544	2.48482	0.0148721	0.0847649	0.00442095	2.18494	0.0315762	0.129442
NVEC200_000600_1.1	6.35684	-0.0853054	-1.58861	0.115769	0.369007	0.203253	3.86332	0.000214561	0.00948853	0.058974	1.55284	0.124085	0.572622	0.00580959	0.982965	0.328345	0.562315	0.0579782	1.5657	0.121042	0.568438	0.288559	3.87915	0.000203002	0.00349539	-0.000669328	-0.532642	0.595637	0.77432
NVEC200_000601_1.1	1.24955	-0.714118	-2.66348	0.00921099	0.0845074	0.244738	0.957518	0.340954	0.674928	-0.23469	-1.23649	0.219597	0.66268	0.000555994	0.019483	0.9845	0.993768	0.140796	0.802203	0.424617	0.821439	0.958856	2.65603	0.00940106	0.0612814	0.00578425	0.967525	0.335958	0.564641
NVEC200_000602_1.1	2.2409	0.13438	0.791916	0.43056	0.706338	-0.162503	-0.951909	0.343775	0.677335	-0.0140617	-0.11719	0.906979	0.981808	-0.00643474	-0.333636	0.739456	0.869025	-0.294502	-2.44519	0.0164895	0.29681	-0.296883	-1.22974	0.222105	0.486009	0.000803019	0.197992	0.843512	0.922364
NVEC200_000603_1.1	1.80537	-0.124597	-0.570638	0.569714	0.796595	-0.335433	-1.61963	0.108925	0.393398	-0.230015	-1.4877	0.14044	0.591492	-0.0158452	-0.676777	0.500339	0.711116	0.129488	0.898226	0.371539	0.790739	-0.210836	-0.720968	0.472858	0.72386	0.00995297	2.01706	0.0467667	0.167771
NVEC200_000605_1.1	11.9797	0.0580272	1.4055	0.163428	0.441773	0.00491454	0.120372	0.904465	0.971494	0.0314709	1.07794	0.284034	0.718657	-0.012883	-2.81553	0.00602066	0.0407139	0.000679458	0.0236222	0.981208	0.998097	-0.0531126	-0.91993	0.360148	0.630092	0.00156438	1.60009	0.113198	0.291935
NVEC200_000606_1.1	4.83953	-0.286296	-2.21824	0.0293802	0.172246	0.0830134	0.667967	0.506082	0.791373	-0.101641	-1.11293	0.269079	0.707606	0.0355763	2.54064	0.013004	0.0707706	0.109594	1.25055	0.214753	0.671253	0.369309	2.10289	0.0386262	0.164829	-0.00168223	-0.56721	0.572164	0.757504
NVEC200_000607_1.1	5.00391	-0.0713513	-1.17527	0.243086	0.53944	-0.0046822	-0.0787934	0.937378	0.98288	-0.0380168	-0.885375	0.37839	0.780002	0.0101155	1.5095	0.134787	0.328198	-0.0279189	-0.66563	0.507405	0.858406	0.0666691	0.793512	0.429635	0.694123	0.00384856	2.71219	0.00805178	0.0515293
NVEC200_000608_1.1	6.08315	-0.16058	-2.52586	0.0133487	0.105808	0.038751	0.623807	0.534384	0.805309	-0.0609143	-1.35468	0.179019	0.628998	0.00107963	0.154483	0.877586	0.944289	0.0585121	1.33878	0.184125	0.647836	0.199331	2.26959	0.0256998	0.124979	0.00274244	1.84291	0.0687405	0.21327
NVEC200_000609_1.1	0.444567	0.320867	0.550676	0.583474	0.805437	1.23584	2.19064	0.0315498	0.201705	0.778353	1.88815	0.0628302	0.469226	0.152801	2.46203	0.0160855	0.081675	0.147758	0.364869	0.716225	0.930061	0.914971	1.14748	0.254791	0.523874	0.0220861	1.78278	0.0786235	0.232579
NVEC200_000611_1.1	6.68822	-0.0729885	-0.846695	0.39965	0.681078	0.256357	3.0051	0.00352905	0.0610214	0.0916845	1.50404	0.136445	0.587484	-0.0127512	-1.33056	0.187052	0.401624	-0.0695649	-1.15837	0.250105	0.707011	0.329346	2.73008	0.00776045	0.0534792	-0.00158032	-0.775074	0.440544	0.657686
NVEC200_000612_1.1	9.38107	0.0941817	2.0734	0.0410865	0.209505	0.0645638	1.43705	0.154284	0.466614	0.0793728	2.47103	0.0154182	0.329082	-0.0200007	-3.97285	0.00014587	0.00252938	-0.00240919	-0.0761471	0.939477	0.989469	-0.0296179	-0.466173	0.642255	0.832723	-0.000937047	-0.871362	0.38595	0.61098
NVEC200_000613_1.1	4.87492	0.157414	1.97074	0.0519272	0.238225	-0.183344	-2.34422	0.0213405	0.162951	-0.0129647	-0.229491	0.819025	0.963273	0.0336537	3.81965	0.000249792	0.00387256	-0.0640617	-1.15333	0.251929	0.707238	-0.340758	-3.08151	0.00275632	0.0249714	0.00230497	1.23785	0.219097	0.43536
NVEC200_000614_1.1	4.82117	0.071038	0.901453	0.369832	0.659956	-0.150182	-1.97583	0.0513366	0.265134	-0.0395722	-0.709699	0.479785	0.833006	0.0229271	2.67865	0.00883472	0.0534767	0.0878689	1.63839	0.104946	0.547628	-0.22122	-2.05943	0.0424369	0.1759	-0.00195827	-1.0808	0.282768	0.511378
NVEC200_000616_1.1	2.95452	0.0204952	0.148678	0.882151	0.952082	0.0750395	0.575099	0.566706	0.822075	0.0477674	0.489311	0.62585	0.892738	-0.0316212	-2.15238	0.0341309	0.135625	0.114798	1.27237	0.206625	0.663943	0.0545444	0.29609	0.767866	0.898462	-0.0073264	-2.38633	0.0191815	0.0933016
NVEC200_000618_1.1	5.39372	-0.0131509	-0.193536	0.846989	0.938217	0.0477192	0.721639	0.472448	0.77248	0.0172841	0.359591	0.720023	0.92428	-0.0243927	-3.27457	0.00151891	0.0151471	0.0424428	0.916635	0.361863	0.784334	0.0608701	0.651157	0.516658	0.751514	-0.000379672	-0.24077	0.810299	0.905878
NVEC200_000619_1.1	4.7106	0.0272928	0.275981	0.783216	0.908383	-0.0110361	-0.113624	0.909797	0.972999	0.00812831	0.116219	0.907747	0.982121	0.00823903	0.751983	0.454087	0.675281	-0.0567969	-0.828249	0.409792	0.812577	-0.0383289	-0.279084	0.780841	0.905543	0.000858927	0.371017	0.711525	0.848859
NVEC200_000620_1.1	4.87808	-0.130613	-1.38628	0.169196	0.449189	0.00914337	0.10069	0.920027	0.975996	-0.0607346	-0.911009	0.364803	0.77408	0.043568	4.25345	5.27444e-05	0.00116836	0.114343	1.77887	0.0787474	0.501848	0.139756	1.08907	0.279125	0.549039	-0.00633912	-2.92178	0.00443143	0.0334995
NVEC200_000621_1.1	6.14158	0.126797	2.40515	0.0182808	0.128278	-0.10633	-2.05686	0.0426891	0.239788	0.0102336	0.27447	0.784373	0.949963	-0.014801	-2.54618	0.0126478	0.0691074	-0.00034974	-0.00961895	0.992347	0.999586	-0.233126	-3.18943	0.00198119	0.0200467	-0.000831384	-0.672997	0.50273	0.707832
NVEC200_000622_1.1	7.01855	-0.053708	-1.05781	0.293065	0.59026	0.117293	2.34268	0.0214236	0.163084	0.0317925	0.885452	0.378349	0.780002	-0.0122324	-2.17604	0.0322578	0.130496	-0.00283388	-0.0803928	0.936109	0.989153	0.171001	2.41528	0.017812	0.0965947	-0.000344115	-0.287094	0.774721	0.888392
NVEC200_000623_1.1	4.41831	-0.141956	-1.55252	0.124162	0.381611	0.178302	2.01021	0.0475001	0.254207	0.0181731	0.280948	0.779416	0.947945	-0.0204171	-2.04137	0.0442381	0.161025	0.0254252	0.411153	0.681969	0.920898	0.320259	2.55437	0.0123746	0.07432	-0.00336499	-1.59717	0.113847	0.292965
NVEC200_000624_1.1	7.2448	0.0213785	0.439836	0.661144	0.849865	-0.103998	-2.1611	0.0334296	0.209472	-0.0413097	-1.20187	0.232667	0.678662	-0.00817409	-1.51317	0.133854	0.326704	-0.0941704	-2.77534	0.00674716	0.20653	-0.125376	-1.84236	0.0688227	0.242437	0.00293562	2.54518	0.0126815	0.0704475
NVEC200_000625_1.1	3.86163	-0.0336685	-0.337468	0.736576	0.887925	0.192202	1.96	0.0531907	0.270095	0.0792667	1.12344	0.264336	0.704935	-0.0125092	-1.13063	0.261311	0.490983	-0.0881522	-1.28296	0.202907	0.659905	0.22587	1.62895	0.106932	0.318386	0.00144086	0.620937	0.536262	0.731639
NVEC200_000626_1.1	2.16485	0.581117	2.67021	0.0090423	0.0836871	-0.279932	-1.37071	0.173984	0.490553	0.150593	0.976606	0.331467	0.751578	-0.0676699	-2.95787	0.00398646	0.0302715	0.0737731	0.526967	0.599555	0.895944	-0.861049	-2.98822	0.00364468	0.0306273	0.000321485	0.0678201	0.946084	0.975032
NVEC200_000627_1.1	2.37066	0.408672	1.91774	0.0584184	0.253332	-0.143415	-0.720191	0.473334	0.773723	0.132629	0.878142	0.382281	0.781928	-0.00304728	-0.137703	0.890793	0.951722	0.129945	0.943777	0.347892	0.77444	-0.552087	-1.96562	0.0525258	0.202499	-0.000819837	-0.178482	0.858759	0.930651
NVEC200_000628_1.1	3.81867	0.242334	2.06413	0.041978	0.211736	-0.191466	-1.70774	0.0912432	0.358083	0.0254342	0.306051	0.760296	0.938838	0.00403107	0.320205	0.749579	0.874652	0.11592	1.47487	0.143849	0.599079	-0.4338	-2.73914	0.00746931	0.0519978	-0.000413137	-0.155959	0.876426	0.941145
NVEC200_000629_1.1	7.11791	0.0561258	1.17144	0.244616	0.540699	-0.045296	-0.957472	0.340977	0.674928	0.00541492	0.159819	0.873393	0.975469	-0.0100514	-1.8925	0.0617433	0.200177	-0.0371265	-1.11381	0.268423	0.720836	-0.101422	-1.51607	0.133121	0.362502	-0.00397217	-3.50575	0.000721699	0.00880215
NVEC200_000630_1.1	3.07775	0.223845	1.45688	0.148743	0.419126	0.430573	2.955	0.00402035	0.0655426	0.327209	3.00748	0.00344201	0.213423	0.0315519	1.95067	0.0543088	0.184194	0.186256	1.82861	0.0708784	0.486532	0.206727	1.00479	0.317777	0.587306	0.00845492	2.55087	0.0124908	0.0697374
NVEC200_000631_1.1	3.21751	0.329685	2.44233	0.016612	0.120702	-0.00105097	-0.00784021	0.993762	0.997298	0.164317	1.72144	0.0887183	0.518197	-0.00639202	-0.424526	0.672228	0.831175	-0.166631	-1.76751	0.0806421	0.503714	-0.330736	-1.74467	0.0845666	0.274008	0.000508701	0.161812	0.871829	0.938963
NVEC200_000632_1.1	4.5927	0.269042	2.44612	0.0164498	0.120133	-0.0458354	-0.431825	0.666935	0.873846	0.111603	1.43408	0.155126	0.607886	0.00935808	0.785307	0.434403	0.65886	0.0450779	0.604815	0.546873	0.878046	-0.314877	-2.09908	0.038702	0.165012	-0.00452758	-1.80553	0.0744438	0.224537
NVEC200_000634_1.1	4.65784	0.208618	2.30617	0.0234736	0.150382	-0.273762	-3.14932	0.00224188	0.0468237	-0.0325719	-0.508805	0.612174	0.887403	-0.0441857	-4.5107	2.00559e-05	0.000533393	0.0906309	1.49758	0.137855	0.590495	-0.482381	-3.92728	0.000171407	0.00303968	0.00739099	3.57709	0.000569907	0.00739856
NVEC200_000635_1.1	5.63211	0.141098	1.72322	0.088395	0.318248	0.148474	1.8473	0.0680955	0.30587	0.144786	2.50026	0.0142817	0.322145	0.000785276	0.086951	0.93091	0.968405	-0.0222923	-0.394039	0.694515	0.923466	0.00737592	0.0649033	0.9484	0.981202	-0.00152996	-0.801828	0.424833	0.644575
NVEC200_000636_1.1	6.59539	0.0531867	0.568853	0.571066	0.797224	0.0946381	1.03468	0.303968	0.641644	0.0739124	1.1177	0.267076	0.706367	-0.0119449	-1.16292	0.248354	0.477968	0.0851916	1.3253	0.188882	0.650212	0.0414515	0.320535	0.749407	0.889695	-0.00771941	-3.52978	0.000696281	0.0086031
NVEC200_000637_1.1	5.9322	0.163079	1.89129	0.0619211	0.260973	-0.112318	-1.32589	0.188355	0.512587	0.0253805	0.416207	0.678286	0.910758	-0.00618981	-0.649638	0.517642	0.724321	-0.0572035	-0.958991	0.340227	0.768748	-0.275396	-2.29919	0.0238959	0.118705	-0.00288367	-1.42579	0.157515	0.356863
NVEC200_000638_1.1	4.07269	0.0959362	0.869473	0.386976	0.672277	-0.0229347	-0.214206	0.830887	0.946352	0.0365008	0.467621	0.641223	0.89751	-0.00676398	-0.560316	0.576702	0.764828	0.00782042	0.104176	0.917269	0.984366	-0.118871	-0.785431	0.434331	0.697048	0.00159576	0.629069	0.530949	0.728352
NVEC200_000639_1.1	2.8681	-0.066708	-0.374057	0.70927	0.87439	-0.16073	-0.925415	0.357305	0.690072	-0.113719	-0.901479	0.369818	0.776024	0.0520181	2.63578	0.00993586	0.0580017	-0.0282408	-0.226612	0.821256	0.960874	-0.0940216	-0.382925	0.702708	0.864687	-0.00393518	-0.942944	0.348316	0.57636
NVEC200_000640_1.1	4.57994	-0.00618202	-0.0733438	0.941701	0.978223	-0.0385493	-0.469248	0.640064	0.861322	-0.0223656	-0.375134	0.708472	0.921568	0.0240088	2.5895	0.0112627	0.0637557	-0.0136177	-0.234323	0.815284	0.960803	-0.0323673	-0.278694	0.78114	0.905548	-0.000818116	-0.417209	0.677552	0.827356
NVEC200_000641_1.1	4.13757	0.0789283	0.860886	0.391663	0.675635	-0.0491452	-0.557754	0.578442	0.829024	0.0148916	0.229522	0.819001	0.963273	0.0132792	1.33761	0.184503	0.398222	0.0827253	1.3345	0.185517	0.64904	-0.128074	-1.02867	0.306479	0.576771	-0.0091193	-4.34468	3.75689e-05	0.000905218
NVEC200_000643_1.1	6.18885	0.369781	6.06063	3.37194e-08	5.24742e-06	-0.108134	-1.81455	0.0730329	0.318054	0.130824	3.03147	0.00320417	0.210699	-0.0377148	-5.63763	2.09093e-07	1.32505e-05	0.0346882	0.830522	0.408513	0.812269	-0.477915	-5.67244	1.80291e-07	1.01674e-05	-0.00244885	-1.72821	0.0874923	0.248617
NVEC200_000644_1.1	4.1234	0.018096	0.176698	0.860156	0.943721	0.0195522	0.197861	0.843614	0.95116	0.0188241	0.259776	0.795649	0.954287	0.0104205	0.935275	0.35223	0.585495	0.030497	0.438634	0.662012	0.914571	0.00145616	0.010427	0.991704	0.996894	-0.00561963	-2.39034	0.0189864	0.0927833
NVEC200_000645_1.1	3.4897	-0.0183364	-0.148531	0.882266	0.952122	-0.0766607	-0.631757	0.529199	0.801483	-0.0474986	-0.544046	0.587799	0.879017	0.000292989	0.0213383	0.983025	0.99307	-0.12405	-1.44924	0.150858	0.610281	-0.0583243	-0.339921	0.734733	0.882111	0.00281121	0.970182	0.33464	0.56334
NVEC200_000646_1.1	3.99775	0.189843	1.84412	0.0685627	0.275281	0.13417	1.34849	0.180995	0.500609	0.162006	2.22428	0.028713	0.396626	-0.0256024	-2.28817	0.0245472	0.108205	0.0410828	0.592722	0.554902	0.880082	-0.0556726	-0.395902	0.693144	0.860499	0.000329304	0.141059	0.888149	0.94632
NVEC200_000647_1.1	6.86147	-0.0259031	-0.343146	0.732317	0.886132	-0.0753432	-1.01527	0.312794	0.649099	-0.0506231	-0.948263	0.345623	0.761114	0.0122941	1.47466	0.143913	0.342222	0.0319218	0.609818	0.543572	0.876218	-0.0494402	-0.471158	0.638707	0.831369	-0.00568636	-3.19591	0.00194312	0.0185904
NVEC200_000648_1.1	4.29237	0.401448	3.86897	0.000210368	0.00591823	-0.424046	-4.19601	6.51665e-05	0.00423756	-0.011299	-0.153947	0.878008	0.976694	-0.00408562	-0.360352	0.719455	0.859799	-0.0828159	-1.16743	0.24622	0.703471	-0.825493	-5.77806	1.14742e-07	6.88116e-06	-0.00245429	-1.02332	0.30899	0.5383
NVEC200_000649_1.1	3.77934	-0.236688	-1.63885	0.104849	0.35056	0.333539	2.42977	0.0171599	0.144397	0.0484256	0.473578	0.636985	0.895434	0.0200655	1.30654	0.194804	0.410685	0.216208	2.266	0.0259284	0.346859	0.570228	2.94154	0.0041825	0.0339404	-0.00832039	-2.58811	0.0113048	0.0650055
NVEC200_000650_1.1	3.8346	-0.0490746	-0.460968	0.64597	0.840643	-0.00351375	-0.0333962	0.973435	0.991436	-0.0262942	-0.349268	0.727731	0.925778	0.0343733	2.88994	0.00486154	0.0346331	-0.10628	-1.42062	0.158994	0.620688	0.0455609	0.30622	0.760168	0.895312	-0.00377051	-1.50379	0.13625	0.326489
NVEC200_000651_1.1	5.35968	-0.14151	-1.95314	0.0540108	0.243517	-0.11394	-1.60294	0.112565	0.399885	-0.127725	-2.49263	0.0145708	0.324602	0.000636631	0.0794155	0.936884	0.971086	-0.0435225	-0.86853	0.38749	0.799767	0.0275699	0.274312	0.784494	0.907041	0.0071796	4.20844	6.22609e-05	0.00130176
NVEC200_000652_1.1	3.69272	-0.388804	-3.21953	0.00180449	0.0285513	0.100315	0.857593	0.393469	0.716426	-0.144244	-1.68832	0.0949244	0.529711	0.005196	0.394006	0.694539	0.844659	0.030011	0.366156	0.715136	0.929804	0.48912	2.95835	0.00398086	0.0328021	0.00880506	3.15778	0.00218434	0.0202827
NVEC200_000653_1.1	6.81813	0.0239486	0.494193	0.622413	0.827774	-0.138419	-2.90628	0.00463626	0.071147	-0.0572352	-1.67005	0.0984968	0.531105	0.000425116	0.0794806	0.936833	0.971086	0.0339572	1.01171	0.314475	0.75097	-0.162368	-2.41098	0.0180098	0.0972812	0.000943832	0.82698	0.410507	0.632269
NVEC200_000654_1.1	4.63465	-0.0491155	-0.589493	0.557055	0.788466	-0.13302	-1.62621	0.107515	0.391189	-0.0910676	-1.54549	0.125851	0.573096	-0.0095981	-1.03811	0.30209	0.534451	-0.0691013	-1.20126	0.232904	0.691475	-0.0839042	-0.725447	0.470121	0.722953	-0.00337167	-1.71874	0.0892113	0.252014
NVEC200_000655_1.1	3.45411	0.0105959	0.0838339	0.933381	0.974628	0.0529736	0.430228	0.668092	0.874244	0.0317847	0.355524	0.723056	0.925246	0.0315126	2.26589	0.0259349	0.112388	0.00518212	0.0592829	0.952862	0.992265	0.0423777	0.243455	0.808225	0.917042	0.000179481	0.0615099	0.951094	0.977496
NVEC200_000657_1.1	4.36334	-0.12172	-1.32464	0.188752	0.476982	0.0490475	0.548848	0.584513	0.83345	-0.0363361	-0.559014	0.577586	0.876466	-0.00914871	-0.907062	0.366875	0.599356	0.018922	0.302097	0.763297	0.942077	0.170767	1.35177	0.179946	0.428827	0.00219455	1.03109	0.30535	0.534611
NVEC200_000658_1.1	5.72651	-0.0837202	-1.28475	0.202283	0.494112	0.100925	1.571	0.119806	0.412132	0.00860227	0.186669	0.852354	0.969253	0.00829598	1.14711	0.254475	0.484741	-0.0690117	-1.52276	0.131439	0.583049	0.184645	2.03257	0.0451391	0.18327	0.00373488	2.43366	0.0169882	0.0860667
NVEC200_000659_1.1	5.89955	-0.0664625	-0.9998	0.320175	0.613215	-0.0175806	-0.270664	0.78729	0.929952	-0.0420216	-0.893732	0.373926	0.777498	0.0197142	2.69633	0.00841371	0.0516674	0.0365945	0.798441	0.426785	0.822912	0.0488819	0.532293	0.595877	0.804002	-0.00380926	-2.44986	0.0162908	0.0836587
NVEC200_000660_1.1	2.20914	-0.0774754	-0.41236	0.681088	0.859367	-0.362311	-1.96327	0.0528027	0.268983	-0.219893	-1.65489	0.101543	0.536795	0.00808551	0.386576	0.700012	0.848734	-0.108561	-0.831544	0.407939	0.811787	-0.284836	-1.09157	0.278031	0.547902	0.00557506	1.25495	0.212851	0.428351
NVEC200_000661_1.1	3.37694	-0.0961877	-0.639121	0.52442	0.767435	0.161484	1.09413	0.276911	0.616063	0.0326483	0.30673	0.75978	0.938669	-0.0178704	-1.07227	0.286559	0.519228	-0.101744	-0.986076	0.326825	0.7591	0.257672	1.23475	0.220243	0.484031	-0.000863459	-0.247197	0.805337	0.903887
NVEC200_000662_1.1	4.00912	-0.0910543	-0.904986	0.367968	0.659074	-0.0135295	-0.138139	0.890449	0.966475	-0.0522919	-0.734739	0.464471	0.823805	-0.00332572	-0.30063	0.764412	0.882366	-0.0220349	-0.320347	0.749472	0.938266	0.0775248	0.559922	0.576969	0.791072	0.0017716	0.759491	0.449608	0.665641
NVEC200_000663_1.1	3.91991	0.17255	1.47994	0.142496	0.409616	-0.277133	-2.4803	0.0150491	0.136139	-0.0522914	-0.633692	0.527941	0.854464	-0.0228634	-1.81617	0.0727827	0.220936	0.0602955	0.77274	0.441767	0.828011	-0.449684	-2.84865	0.0054766	0.04118	-0.00614964	-2.3114	0.0231696	0.105734
NVEC200_000664_1.1	2.61562	-0.159117	-0.839174	0.403667	0.684602	-0.0570646	-0.310379	0.757014	0.917179	-0.108091	-0.805811	0.422545	0.808308	-0.00612044	-0.293931	0.76951	0.885221	-0.0155206	-0.120432	0.904418	0.982111	0.102052	0.392691	0.695506	0.862038	0.00132104	0.301298	0.763905	0.881924
NVEC200_000665_1.1	1.87345	0.135412	0.732646	0.46574	0.730189	0.00925408	0.0506863	0.959691	0.98747	0.0723329	0.553422	0.581391	0.877254	0.0419127	2.02461	0.0459679	0.164905	-0.0590508	-0.449324	0.654313	0.912196	-0.126158	-0.48864	0.626323	0.822861	0.00986753	2.27985	0.0250576	0.111132
NVEC200_000666_1.1	4.41373	0.374755	3.65794	0.000434533	0.010033	-0.399273	-3.96491	0.00015004	0.00755981	-0.0122586	-0.169192	0.866037	0.973207	-0.00244986	-0.21664	0.828995	0.920143	-0.116569	-1.64607	0.10335	0.545449	-0.774028	-5.43591	4.89761e-07	2.39885e-05	-0.00285364	-1.19193	0.236523	0.457202
NVEC200_000667_1.1	4.63278	-0.167947	-1.95651	0.0536068	0.242741	0.0403765	0.479544	0.632753	0.858353	-0.0637854	-1.05066	0.296318	0.728354	0.00924112	0.972265	0.333609	0.567336	-0.0550738	-0.927888	0.356028	0.780926	0.208324	1.74988	0.0836589	0.272307	0.000431867	0.214713	0.830493	0.917032
NVEC200_000669_1.1	6.92941	0.513992	8.62624	2.57954e-13	2.11419e-10	-0.137156	-2.32785	0.0222361	0.165143	0.188418	4.47172	2.32671e-05	0.0178779	0.0252741	3.82972	0.000241209	0.00378726	-0.12981	-3.11579	0.00248392	0.129396	-0.651148	-7.81505	1.1619e-11	2.26736e-09	0.00438764	3.12889	0.00238659	0.0216696
NVEC200_000670_1.1	4.6413	0.02074	0.233419	0.815983	0.925158	0.0528268	0.603828	0.547526	0.81102	0.0367834	0.585388	0.559799	0.867865	0.0145411	1.47408	0.144062	0.342403	-0.0919929	-1.48636	0.140792	0.595402	0.0320869	0.259373	0.795959	0.912257	0.0042795	2.05714	0.0426614	0.157636
NVEC200_000672_1.1	7.70428	-0.0922193	-2.10076	0.0385501	0.201588	0.0934016	2.15902	0.0335959	0.209872	0.000591157	0.0190426	0.984851	0.996196	0.00967546	1.99405	0.0492727	0.172335	0.0746606	2.44819	0.0163617	0.295809	0.185621	3.03433	0.0031769	0.0277787	0.000357838	0.345183	0.730789	0.862136
NVEC200_000673_1.1	4.16746	-0.0622261	-0.563528	0.574522	0.799438	-0.0798738	-0.76076	0.448853	0.756022	-0.07105	-0.908799	0.365962	0.77408	0.000349753	0.0296068	0.976448	0.989819	0.168461	2.29621	0.0240624	0.338737	-0.0176477	-0.119023	0.905531	0.963945	0.00756606	3.0372	0.00314973	0.026396
NVEC200_000674_1.1	1.2988	-0.270206	-1.21708	0.226857	0.522509	0.306876	1.37314	0.17323	0.489471	0.0183352	0.116793	0.907293	0.981808	-0.00293735	-0.117032	0.907104	0.958356	-0.215687	-1.38007	0.171095	0.631025	0.577083	1.82593	0.0712845	0.248123	0.00394065	0.74984	0.45537	0.670051
NVEC200_000676_1.1	6.50424	-0.0756717	-1.33969	0.183827	0.469738	0.238726	4.33082	3.95661e-05	0.00300263	0.0815271	2.04061	0.0443152	0.428871	-0.0200489	-3.23935	0.0016963	0.0163302	0.143156	3.70402	0.000371671	0.0501761	0.314398	4.03432	0.000117138	0.00223484	-0.000565908	-0.429838	0.668374	0.820965
NVEC200_000677_1.1	3.11511	-0.0888384	-0.614187	0.540691	0.778031	0.309898	2.18402	0.0316459	0.202001	0.11053	1.08047	0.282911	0.718657	-0.0174123	-1.09036	0.278562	0.50996	-0.0161673	-0.163507	0.870498	0.973768	0.398736	1.98743	0.0500136	0.196192	0.00042232	0.126978	0.89925	0.950837
NVEC200_000678_1.1	5.78614	-0.078818	-1.27375	0.206139	0.497837	-0.0601991	-0.985643	0.327036	0.661528	-0.0695085	-1.58845	0.115805	0.562732	-0.00918714	-1.33503	0.185342	0.399482	-0.0835815	-1.94254	0.0553	0.450704	0.0186189	0.21558	0.829819	0.928249	0.00530843	3.62645	0.000483163	0.00649891
NVEC200_000679_1.1	0.879545	0.995491	1.40529	0.164203	0.443186	1.73299	2.44586	0.0168763	0.143483	1.36424	2.72354	0.00808559	0.284523	0.0228476	0.314872	0.753763	0.876124	0.00335103	0.0072179	0.994261	0.999586	0.737497	0.736007	0.464099	0.718828	0.0197099	1.39293	0.167893	0.372107
NVEC200_000680_1.1	5.17845	-0.141344	-1.78721	0.0773791	0.294514	0.0485783	0.633232	0.52824	0.800861	-0.0463829	-0.829029	0.409352	0.801036	0.0401302	4.64199	1.20995e-05	0.000358436	0.0665347	1.22463	0.224015	0.682032	0.189922	1.75144	0.0833869	0.272049	0.00217555	1.18881	0.237742	0.459271
NVEC200_000681_1.1	4.79637	0.0758761	0.99386	0.323042	0.615924	0.200175	2.69233	0.00850736	0.101214	0.138025	2.55589	0.0123248	0.316883	0.0221551	2.65022	0.00955177	0.0564022	0.0374911	0.715121	0.476445	0.845176	0.124299	1.18258	0.240191	0.508307	-0.00202246	-1.15088	0.252927	0.476549
NVEC200_000684_1.1	4.22017	0.19157	1.7235	0.0883443	0.318248	-0.0403	-0.369879	0.71237	0.898889	0.075635	0.96213	0.338646	0.758336	-0.0194025	-1.57889	0.117984	0.301747	-0.0770085	-1.00748	0.316491	0.751941	-0.23187	-1.50513	0.135906	0.366087	0.00553639	2.14528	0.0347119	0.138106
NVEC200_000685_1.1	5.16908	-0.0543658	-0.535344	0.593775	0.812258	0.254301	2.61184	0.0106034	0.113355	0.0999674	1.3909	0.167797	0.6194	-0.0095522	-0.873487	0.384798	0.615496	0.202265	2.97978	0.00373685	0.158127	0.308667	2.24385	0.0273757	0.130499	-0.0164878	-7.11105	3.02341e-10	9.06582e-08
NVEC200_000686_1.1	4.81191	-0.181559	-2.04484	0.0438871	0.217035	0.217175	2.50662	0.0140447	0.131106	0.0178083	0.283562	0.777418	0.947075	0.0249078	2.55241	0.0124397	0.0681829	0.00686413	0.112427	0.910743	0.983842	0.398734	3.25524	0.00161401	0.0171205	-0.00404695	-1.96459	0.0526473	0.180291
NVEC200_000687_1.1	3.22823	-0.22706	-1.73365	0.086516	0.314551	-0.0364941	-0.284072	0.777029	0.926017	-0.131777	-1.42264	0.15841	0.608994	0.0123946	0.852123	0.396481	0.625239	-0.0564168	-0.620982	0.536232	0.871624	0.190566	1.04911	0.297027	0.567556	0.00595115	1.93478	0.0562605	0.187744
NVEC200_000688_1.1	1.78889	0.102457	0.390475	0.697138	0.868418	-0.0403192	-0.164946	0.869368	0.96038	0.0310688	0.167031	0.867733	0.973809	0.0111677	0.408283	0.684067	0.838353	0.243065	1.42862	0.156687	0.617803	-0.142776	-0.414228	0.679724	0.852742	0.00530818	0.933805	0.352984	0.58148
NVEC200_000689_1.1	0.507632	0.703694	1.0312	0.305837	0.600537	1.59317	2.33018	0.022553	0.166527	1.14843	2.38002	0.0199144	0.353277	0.0247899	0.342006	0.733325	0.865292	0.036618	0.0788305	0.937382	0.989153	0.889481	0.919915	0.360635	0.630586	0.037113	2.58414	0.0117533	0.066772
NVEC200_000691_1.1	3.90099	-0.278612	-2.75859	0.00707294	0.0708677	0.243813	2.50365	0.0141549	0.131934	-0.0173997	-0.243475	0.80821	0.960198	0.0200254	1.82782	0.070998	0.217181	0.0652231	0.956659	0.341385	0.769484	0.522425	3.79609	0.000271017	0.00437254	-0.00513728	-2.22718	0.0285116	0.120911
NVEC200_000692_1.1	5.32038	-0.203496	-2.33634	0.0217678	0.143415	-0.0949749	-1.1296	0.261744	0.59829	-0.149235	-2.42156	0.0175266	0.341477	-0.00503588	-0.531232	0.596609	0.778375	0.107982	1.83202	0.0703637	0.485319	0.108521	0.913283	0.363613	0.63385	-0.0101881	-5.03496	2.55071e-06	0.000109263
NVEC200_000693_1.1	3.89021	0.295452	2.80579	0.00618982	0.0652201	0.0786613	0.757523	0.450779	0.756984	0.187057	2.51196	0.0138482	0.322145	-0.0156846	-1.34505	0.1821	0.395186	-0.137546	-1.89372	0.0615797	0.463051	-0.216791	-1.4764	0.14344	0.378018	-0.00246783	-1.01391	0.313432	0.542876
NVEC200_000694_1.1	4.38803	0.130499	1.30288	0.196047	0.486222	-0.238901	-2.46396	0.0157048	0.138803	-0.0542007	-0.764869	0.446415	0.813949	-0.00659881	-0.603588	0.547685	0.744416	0.0277253	0.407258	0.684817	0.921457	-0.3694	-2.69552	0.00843257	0.0567744	0.000873922	0.377817	0.706485	0.845719
NVEC200_000695_1.1	3.84316	0.490299	4.34192	3.7958e-05	0.00162598	-0.200252	-1.86851	0.0650501	0.299523	0.145023	1.81376	0.0731564	0.490395	-0.0387279	-3.23215	0.0017349	0.0165531	0.11351	1.52906	0.12987	0.580167	-0.690551	-4.5631	1.64076e-05	0.000470197	-0.000745454	-0.297758	0.766596	0.883277
NVEC200_000696_1.1	8.37898	0.0626052	1.13563	0.259223	0.556954	-0.0459476	-0.840897	0.402707	0.723283	0.00832881	0.213652	0.831317	0.96523	-0.013657	-2.22981	0.0283295	0.119153	-0.0953415	-2.47519	0.0152515	0.287581	-0.108553	-1.40483	0.163626	0.406131	-0.00141827	-1.08324	0.281688	0.510327
NVEC200_000697_1.1	6.17281	-0.117544	-1.88447	0.0628337	0.262442	-0.0263307	-0.428836	0.669101	0.874909	-0.0719373	-1.63082	0.106537	0.542898	0.0188096	2.72194	0.00783639	0.0489287	-0.0374434	-0.862918	0.390551	0.801842	0.0912132	1.05058	0.296358	0.566893	0.00292493	1.98757	0.0499979	0.174229
NVEC200_000698_1.1	5.33941	0.476893	3.07553	0.00295118	0.0388041	0.120476	0.807814	0.421808	0.737782	0.298684	2.72206	0.00809895	0.284523	0.0289698	1.73977	0.0860905	0.246196	0.118693	1.13048	0.261953	0.714993	-0.356418	-1.69127	0.0950269	0.29441	-0.00430797	-1.23253	0.221684	0.438799
NVEC200_000699_1.1	2.53517	0.291632	1.92208	0.057862	0.252332	-0.18339	-1.26211	0.210277	0.539066	0.054121	0.503977	0.615549	0.889055	-0.0167482	-1.02417	0.308589	0.541429	0.00868285	0.0856074	0.931975	0.988749	-0.475021	-2.314	0.0230199	0.115559	-0.00426214	-1.24229	0.217463	0.433513
NVEC200_000700_1.1	4.74104	-0.0647246	-0.757557	0.450759	0.719599	0.145678	1.74509	0.0844929	0.34305	0.0404766	0.669805	0.504753	0.845468	0.0375698	3.99047	0.000137012	0.00242363	-0.00500795	-0.0846912	0.932701	0.989	0.210402	1.78272	0.0781132	0.26224	-0.00789917	-3.97365	0.000145457	0.002551
NVEC200_000701_1.1	5.72738	-0.154527	-2.33029	0.0221006	0.144601	0.0573679	0.890834	0.37547	0.702928	-0.0485794	-1.03559	0.303258	0.733803	0.0135898	1.876	0.0640017	0.204426	0.108379	2.39144	0.0189329	0.309755	0.211895	2.32772	0.0222435	0.112907	0.00269454	1.75067	0.0835216	0.241781
NVEC200_000702_1.1	3.94074	-0.131848	-1.24075	0.218026	0.511305	0.160052	1.55883	0.122661	0.416343	0.0141017	0.187561	0.851657	0.968931	0.0234101	2.02331	0.0461043	0.165189	0.0525782	0.72575	0.469936	0.840837	0.2919	2.01155	0.0473556	0.189207	0.00112591	0.463514	0.644151	0.807751
NVEC200_000703_1.1	5.13867	-0.164489	-0.919875	0.360678	0.651805	-0.0416586	-0.244615	0.807443	0.937025	-0.103074	-0.814212	0.41818	0.805388	0.00431643	0.225617	0.822132	0.916192	0.225104	1.89055	0.062667	0.463276	0.12283	0.510671	0.611128	0.814362	-0.00167911	-0.413444	0.680497	0.829488
NVEC200_000704_1.1	3.56196	-0.180167	-1.1376	0.258451	0.556187	-0.202893	-1.31986	0.190386	0.514566	-0.19153	-1.70951	0.0909653	0.524472	-0.0328088	-1.88128	0.0633197	0.203623	-0.0430698	-0.401163	0.689296	0.922703	-0.0227256	-0.104584	0.916949	0.969378	0.00480003	1.30223	0.196316	0.407243
NVEC200_000705_1.1	2.65295	0.124542	0.714495	0.47683	0.737133	-0.284703	-1.72519	0.088037	0.351275	-0.0800806	-0.648744	0.518209	0.851296	0.00793989	0.427079	0.670375	0.829551	0.0676487	0.584644	0.560298	0.880867	-0.409245	-1.75648	0.0825187	0.270871	-0.0123008	-3.09874	0.00261616	0.0231722
NVEC200_000706_1.1	1.61734	0.0359045	0.17731	0.859677	0.94354	-0.281754	-1.37768	0.171828	0.488315	-0.122925	-0.858453	0.392997	0.790151	-0.0189085	-0.817435	0.415908	0.642968	-0.24871	-1.72352	0.0883405	0.51717	-0.317658	-1.09836	0.275071	0.544517	0.00783898	1.59805	0.11365	0.292732
NVEC200_000707_1.1	3.97997	0.0249298	0.208231	0.835535	0.933132	0.197001	1.64184	0.104226	0.383869	0.110966	1.31078	0.193377	0.639954	0.00533075	0.394491	0.694182	0.844631	-0.178911	-2.11143	0.0375981	0.399509	0.172072	1.01405	0.313368	0.58353	0.00575	2.02836	0.045576	0.164507
NVEC200_000708_1.1	8.85008	0.0658588	0.803479	0.42415	0.69984	0.190693	2.34811	0.0214147	0.163084	0.128276	2.2131	0.0298267	0.398606	-0.0015213	-0.167202	0.867646	0.939975	-0.061819	-1.07974	0.283599	0.730018	0.124834	1.08698	0.280408	0.550254	0.00189746	0.976381	0.331907	0.561121
NVEC200_000709_1.1	8.72252	0.124281	1.22256	0.225398	0.520383	0.057177	0.568351	0.571528	0.824947	0.0907291	1.26213	0.210889	0.655957	-0.00359382	-0.31887	0.750729	0.874921	-0.0134664	-0.189914	0.8499	0.969346	-0.0671042	-0.471687	0.638546	0.831369	0.00123896	0.514507	0.60844	0.782771
NVEC200_000710_1.1	7.81469	0.0345278	0.327158	0.744476	0.891931	0.00618518	0.0592253	0.952933	0.987055	0.0203565	0.272761	0.7858	0.95041	-0.0112435	-0.959875	0.34026	0.573899	-0.0532084	-0.722835	0.472071	0.841872	-0.0283426	-0.191913	0.848338	0.938746	0.000817897	0.326911	0.744663	0.870401
NVEC200_000711_1.1	4.31887	-0.049722	-0.41182	0.681482	0.859561	0.16647	1.4104	0.161979	0.476632	0.0583739	0.683566	0.496062	0.840837	0.0113416	0.853011	0.395991	0.624931	0.00924207	0.111104	0.911789	0.983842	0.216192	1.29554	0.198556	0.45322	0.00458782	1.64241	0.104107	0.276615
NVEC200_000712_1.1	7.21768	-0.0474559	-0.419903	0.675782	0.856447	-0.0331299	-0.297768	0.766721	0.920964	-0.0402929	-0.504138	0.615673	0.889055	-0.00432332	-0.346261	0.730136	0.864192	0.0568963	0.725929	0.470189	0.841044	0.014326	0.0910591	0.927693	0.972962	0.00461835	1.73185	0.0874974	0.248617
NVEC200_000713_1.1	5.67735	-0.11376	-1.4627	0.147145	0.417081	0.0987364	1.29818	0.197651	0.523932	-0.00751192	-0.13656	0.891694	0.979392	-0.000740606	-0.0864419	0.931313	0.968446	0.0272303	0.509241	0.61187	0.900918	0.212497	1.97609	0.0513068	0.199673	-0.00793873	-4.3594	3.55536e-05	0.000867255
NVEC200_000714_1.1	5.35508	0.119612	1.76144	0.0816709	0.30463	0.0503128	0.758044	0.450469	0.756898	0.0849624	1.76897	0.0803964	0.502618	0.00603884	0.808887	0.420782	0.646987	-0.00542003	-0.115958	0.907952	0.983219	-0.0692991	-0.738495	0.462198	0.717638	-0.00495667	-3.14049	0.00230335	0.0211603
NVEC200_000715_1.1	8.94235	0.0220107	0.521723	0.603187	0.817684	0.0404401	0.968693	0.335379	0.668908	0.0312254	1.04666	0.298152	0.730028	-0.0149924	-3.2049	0.00188847	0.017568	-0.0055216	-0.187731	0.851524	0.969531	0.0184293	0.312171	0.755656	0.892586	0.00351193	3.51284	0.000705052	0.00865926
NVEC200_000716_1.1	2.84789	0.0883209	0.705694	0.48226	0.741797	-0.121531	-0.993108	0.323406	0.657809	-0.0166051	-0.187585	0.851638	0.968931	0.0315974	2.28213	0.0249169	0.109286	-0.0673481	-0.773092	0.441559	0.828011	-0.209852	-1.21289	0.228448	0.494547	-0.00181237	-0.621599	0.535828	0.731392
NVEC200_000717_1.1	6.28194	-0.0894342	-1.91125	0.059258	0.255352	0.114636	2.49991	0.0142949	0.132435	0.012601	0.380756	0.70431	0.920072	0.0152265	2.95415	0.00403039	0.0304992	0.0391045	1.20949	0.229747	0.688078	0.20407	3.14746	0.00225469	0.0217747	0.000799757	0.729488	0.467659	0.68098
NVEC200_000718_1.1	2.50453	-0.24287	-1.61286	0.110389	0.359409	0.220422	1.48648	0.140761	0.445893	-0.011224	-0.105399	0.916301	0.984425	-0.00670119	-0.401036	0.689375	0.841545	-0.0893708	-0.864314	0.389788	0.801788	0.463292	2.20951	0.0297602	0.137371	0.00323948	0.928531	0.355696	0.584336
NVEC200_000719_1.1	2.1298	0.368915	1.714	0.0900836	0.322413	-0.475777	-2.26458	0.026019	0.179867	-0.053431	-0.350966	0.726461	0.925665	-0.0699621	-2.94546	0.00413467	0.0311215	-0.086738	-0.596619	0.552308	0.879562	-0.844691	-2.84381	0.00555313	0.0416025	0.000707532	0.141892	0.887493	0.946317
NVEC200_000720_1.1	1.86582	0.331805	1.81434	0.0730658	0.285977	-0.0449781	-0.254596	0.799635	0.934691	0.143414	1.10836	0.270756	0.708752	-0.0530531	-2.66355	0.00920925	0.0549338	-0.0749402	-0.613616	0.541067	0.874901	-0.376784	-1.50906	0.1349	0.365058	-0.00891247	-2.1537	0.0340245	0.136209
NVEC200_000721_1.1	5.6548	-0.097294	-1.62698	0.10735	0.354775	0.0290026	0.493878	0.622635	0.854344	-0.0341457	-0.807378	0.421646	0.8075	-0.0047278	-0.714516	0.476817	0.692825	-0.0353522	-0.855478	0.394632	0.804329	0.126297	1.52102	0.131875	0.360529	-0.00245256	-1.74508	0.0844957	0.243383
NVEC200_000722_1.1	6.64799	-0.0166534	-0.313192	0.754883	0.895921	0.0266398	0.51238	0.609681	0.847036	0.00499319	0.132767	0.894683	0.979727	5.19323e-05	0.00889313	0.992925	0.996794	0.117897	3.22297	0.00178529	0.110259	0.0432932	0.588953	0.557416	0.779356	-0.00655766	-5.26688	9.88968e-07	5.13012e-05
NVEC200_000723_1.1	2.7154	-0.170362	-1.0442	0.299278	0.595501	-0.224314	-1.37876	0.171497	0.488062	-0.197338	-1.71056	0.09072	0.523866	-0.0161236	-0.872452	0.385359	0.61582	-0.161752	-1.41808	0.159733	0.62164	-0.0539525	-0.234493	0.815152	0.9207	-0.00233111	-0.592252	0.555215	0.745828
NVEC200_000724_1.1	3.51012	-0.0988303	-0.863373	0.390302	0.674673	0.000691871	0.00616568	0.995095	0.997447	-0.0490692	-0.606103	0.546021	0.862348	0.0315341	2.48014	0.0150555	0.0782632	-0.0580637	-0.726138	0.469699	0.840837	0.0995222	0.627264	0.532126	0.762062	-0.00325973	-1.21324	0.228314	0.447125
NVEC200_000725_1.1	6.48271	0.00208212	0.0255109	0.979707	0.992351	0.280184	3.48164	0.000788189	0.0234624	0.141133	2.44523	0.0165328	0.336312	0.0126177	1.39686	0.166081	0.373362	-0.0271866	-0.479	0.633165	0.905823	0.278102	2.44385	0.0165918	0.0922454	0.00433173	2.25806	0.0264946	0.11526
NVEC200_000727_1.1	6.36061	-0.0218655	-0.287845	0.774148	0.905124	0.0365277	0.488833	0.626188	0.855834	0.00733112	0.136467	0.891767	0.979392	-0.00581318	-0.691935	0.490817	0.703112	-0.0213486	-0.405622	0.686014	0.921742	0.0583932	0.552644	0.581922	0.794905	0.00127776	0.714796	0.476645	0.688587
NVEC200_000728_1.1	5.24587	0.0401475	0.6094	0.543844	0.779736	0.0189292	0.294509	0.76907	0.921942	0.0295384	0.633888	0.527814	0.854464	-0.0160394	-2.21518	0.0293548	0.12221	0.00566911	0.125765	0.900208	0.980957	-0.0212183	-0.233508	0.815914	0.921191	0.002203	1.43901	0.153729	0.351485
NVEC200_000729_1.1	4.97895	-0.158274	-2.1772	0.0321678	0.181325	-0.180462	-2.53512	0.013025	0.125789	-0.169368	-3.29413	0.00142803	0.170777	0.0171287	2.13043	0.0359531	0.140248	-0.0359953	-0.715483	0.476223	0.845176	-0.0221886	-0.220459	0.826029	0.926147	0.0014338	0.837705	0.404487	0.626688
NVEC200_000730_1.1	2.14145	0.0285769	0.152871	0.878854	0.950191	0.00374284	0.0214082	0.982969	0.994062	0.0161599	0.121979	0.903197	0.981546	-0.0537156	-2.72513	0.00776709	0.0486891	0.241298	2.0151	0.0469757	0.432572	-0.0248341	-0.100701	0.920019	0.970519	0.0035831	0.880239	0.38115	0.606343
NVEC200_000732_1.1	3.76154	-0.0162693	-0.134962	0.892953	0.95696	0.00421884	0.0367706	0.970752	0.990491	-0.00602524	-0.0705993	0.943878	0.990021	-0.00516526	-0.399566	0.690454	0.842046	0.129124	1.61159	0.110667	0.557139	0.0204882	0.12644	0.899675	0.961207	-0.0146231	-5.33395	7.4921e-07	4.07557e-05
NVEC200_000733_1.1	3.96691	-0.123583	-1.1069	0.271384	0.570326	0.205767	1.88682	0.0625129	0.294119	0.041092	0.520358	0.604134	0.884447	0.00800034	0.651044	0.516731	0.723871	-0.00516047	-0.067326	0.946476	0.99023	0.329349	2.13611	0.0354739	0.154981	0.000508575	0.197129	0.844186	0.922478
NVEC200_000734_1.1	4.97417	-0.103009	-1.12083	0.265439	0.563708	-0.0354127	-0.396934	0.692386	0.887848	-0.0692106	-1.06454	0.290024	0.72221	-0.01261	-1.25314	0.213505	0.434582	0.0446624	0.714236	0.47699	0.845176	0.0675959	0.536004	0.593321	0.802452	0.00430816	2.02049	0.0464018	0.1669
NVEC200_000735_1.1	4.52142	0.610332	6.84017	1.04067e-09	2.55881e-07	-0.465158	-5.35556	6.84858e-07	0.000133645	0.0725872	1.15005	0.253268	0.694396	-0.036698	-3.77797	0.00028851	0.00430454	-0.0930026	-1.53755	0.127781	0.577805	-1.07549	-8.75917	1.37829e-13	4.70686e-11	-0.00792462	-3.86228	0.00021534	0.00346971
NVEC200_000736_1.1	3.82529	-0.086055	-0.751437	0.454414	0.721979	-0.118416	-1.06271	0.290851	0.62975	-0.102235	-1.26203	0.210304	0.65501	-0.00220133	-0.174711	0.861712	0.937367	-0.0100405	-0.128155	0.898321	0.980382	-0.0323608	-0.205437	0.83771	0.932117	0.0019384	0.72751	0.468863	0.681993
NVEC200_000737_1.1	5.01458	0.0749374	1.08624	0.280367	0.578618	-0.0977385	-1.44217	0.152837	0.463856	-0.0114005	-0.233668	0.81579	0.962785	0.00126001	0.16488	0.86942	0.940891	-0.0691974	-1.44753	0.151336	0.61158	-0.172676	-1.80194	0.0750122	0.255811	-0.000675372	-0.417309	0.677478	0.827356
NVEC200_000740_1.1	7.91763	-0.292504	-2.81023	0.00633528	0.0663423	0.180075	1.75271	0.0838071	0.342414	-0.0562144	-0.763722	0.447468	0.813949	0.0147448	1.27916	0.20485	0.42355	0.0487325	0.672728	0.503222	0.855986	0.472579	3.25276	0.00172506	0.018018	-0.00482806	-1.95834	0.0539711	0.183293
NVEC200_000742_1.1	6.2359	-0.0099625	-0.17572	0.860921	0.944023	0.013517	0.24154	0.809704	0.937689	0.00177723	0.0443277	0.964745	0.993993	-0.0154008	-2.44579	0.0164638	0.0831075	-0.0770481	-1.95573	0.0536997	0.445468	0.0234795	0.296702	0.7674	0.898021	0.00208383	1.5563	0.123261	0.307376
NVEC200_000743_1.1	7.5238	0.0800817	0.729304	0.468131	0.731284	0.343581	3.18612	0.00211649	0.0453313	0.211831	2.72778	0.00796898	0.284523	0.0233398	1.93105	0.0573308	0.191165	0.165737	2.1814	0.0323496	0.3781	0.263499	1.72811	0.0881642	0.280873	-0.0128128	-4.97181	4.20273e-06	0.000158007
NVEC200_000744_1.1	8.27236	0.0775934	1.25594	0.212493	0.50618	0.025592	0.418909	0.676313	0.879571	0.0515927	1.18092	0.240847	0.682505	-0.00797569	-1.16469	0.247324	0.476732	0.00134446	0.0312316	0.975156	0.997253	-0.0520014	-0.601927	0.548785	0.773179	-0.0105243	-7.18973	2.10698e-10	7.19535e-08
NVEC200_000745_1.1	6.38011	-0.259849	-3.15576	0.00220817	0.0325757	0.0486972	0.603307	0.547896	0.811057	-0.105576	-1.81291	0.0733419	0.490569	0.0405174	4.45925	2.47608e-05	0.000626356	0.0334798	0.58644	0.559119	0.880867	0.308546	2.70352	0.00827066	0.0559293	-0.0033491	-1.72854	0.0874868	0.248617
NVEC200_000746_1.1	5.75509	0.0346744	0.491392	0.624384	0.828696	0.143137	2.09372	0.0391895	0.227799	0.0889056	1.78092	0.0784085	0.500578	0.000586882	0.0764241	0.939257	0.972264	0.133521	2.78357	0.00659212	0.20653	0.108462	1.12244	0.264757	0.533944	-0.00754814	-4.63802	1.22875e-05	0.000377657
NVEC200_000747_1.1	3.435	0.126441	1.05033	0.296472	0.5926	-0.00160523	-0.0137571	0.989055	0.996735	0.0624181	0.732906	0.465582	0.824765	0.0048764	0.370809	0.711679	0.855149	0.0159862	0.194794	0.846007	0.969135	-0.128047	-0.77637	0.439632	0.700834	0.000881516	0.319995	0.749738	0.873179
NVEC200_000750_1.1	2.86686	0.142898	0.90728	0.36676	0.658048	0.40387	2.66448	0.00918559	0.104701	0.273384	2.45292	0.0161621	0.334477	0.0238748	1.4106	0.161921	0.366752	0.0639853	0.602494	0.548409	0.878292	0.260972	1.21842	0.226353	0.492092	0.000145869	0.041784	0.966766	0.984627
NVEC200_000751_1.1	5.10933	0.0854659	0.984893	0.327403	0.619816	-0.269576	-3.14647	0.00226152	0.0469647	-0.0920551	-1.50011	0.137199	0.588291	-0.0178721	-1.84856	0.067912	0.211263	-0.120674	-2.00109	0.0484935	0.434904	-0.355042	-2.93051	0.00431976	0.0348437	0.00256924	1.25175	0.214008	0.429694
NVEC200_000752_1.1	5.92561	-0.0660582	-1.11544	0.267728	0.566375	-0.102936	-1.77364	0.0796149	0.334011	-0.0844973	-2.01738	0.0467318	0.434918	-0.00887757	-1.35812	0.177929	0.389505	0.00118871	0.0291167	0.976838	0.997669	-0.0368783	-0.449412	0.65425	0.838635	1.88882e-05	0.0135743	0.989201	0.995579
NVEC200_000754_1.1	6.25288	-0.216956	-3.9933	0.000135637	0.00417926	0.202164	3.80072	0.00026672	0.0112296	-0.00739616	-0.192479	0.847815	0.968323	0.00742843	1.24203	0.217558	0.441071	0.0593711	1.58678	0.116183	0.562344	0.419119	5.57298	2.75061e-07	1.4639e-05	-0.0043042	-3.38047	0.00108454	0.0119261
NVEC200_000755_1.1	8.74549	0.0412079	0.817778	0.415714	0.693835	-0.0185372	-0.372397	0.710501	0.897729	0.0113354	0.318107	0.751165	0.934488	-0.0164583	-2.95084	0.00406982	0.0307336	0.0765917	2.18474	0.0315911	0.377375	-0.059745	-0.848755	0.398342	0.666382	0.00152705	1.28082	0.203653	0.41673
NVEC200_000757_1.1	4.36711	-0.0599971	-0.596693	0.552259	0.785364	-0.0800426	-0.812742	0.418581	0.735115	-0.0700198	-0.984608	0.327542	0.749679	0.0237015	2.13063	0.0359363	0.140248	-0.061196	-0.877041	0.382875	0.797426	-0.0200454	-0.143956	0.885868	0.954755	0.00421198	1.79102	0.076761	0.229109
NVEC200_000758_1.1	5.24976	-0.0516366	-0.442446	0.659375	0.849314	0.0756205	0.658063	0.512409	0.795016	0.011992	0.145297	0.884846	0.978389	-0.0174173	-1.34481	0.182532	0.395706	-0.073855	-0.914385	0.363295	0.785048	0.127257	0.783156	0.435875	0.698257	0.00962407	3.50997	0.00074319	0.0090115
NVEC200_000759_1.1	7.62566	0.18969	1.89699	0.0617034	0.260323	0.159745	1.61194	0.111201	0.397344	0.174718	2.47089	0.0157624	0.330407	-0.00631674	-0.56857	0.571357	0.760251	-0.104649	-1.49777	0.138415	0.59127	-0.0299449	-0.213672	0.831386	0.928755	0.000541469	0.228671	0.819751	0.911102
NVEC200_000760_1.1	7.81336	-0.0489835	-0.926894	0.356541	0.647653	0.035636	0.683683	0.495989	0.786088	-0.00667373	-0.178576	0.858685	0.970968	-0.0113964	-1.94928	0.0544769	0.184501	0.059223	1.61325	0.110305	0.556613	0.0846195	1.14806	0.254086	0.523589	-0.00280499	-2.24506	0.027295	0.117599
NVEC200_000761_1.1	2.84015	-0.236247	-1.59509	0.114312	0.366168	-0.116292	-0.801551	0.424993	0.740722	-0.176269	-1.68274	0.0960035	0.529792	0.0280271	1.70316	0.0921006	0.256734	-0.102093	-0.991245	0.32431	0.758141	0.119955	0.584764	0.560217	0.781583	-0.00277827	-0.795039	0.42875	0.648107
NVEC200_000762_1.1	4.52491	-0.144611	-1.34513	0.182073	0.467405	0.0699673	0.665954	0.507199	0.792476	-0.037322	-0.490825	0.624783	0.892717	0.00383335	0.323344	0.747209	0.87315	-0.0152544	-0.206418	0.836946	0.966024	0.214579	1.44458	0.152162	0.389653	0.00356604	1.42405	0.158003	0.357337
NVEC200_000763_1.1	5.45642	-0.548928	-6.28974	1.23021e-08	2.29154e-06	0.279069	3.23174	0.00173712	0.0391855	-0.13493	-2.18633	0.0314711	0.398606	0.0320442	3.29571	0.00142093	0.0144133	-0.0990421	-1.62637	0.10748	0.552176	0.827997	6.78054	1.36384e-09	1.458e-07	-0.00532585	-2.5727	0.0117829	0.0669093
NVEC200_000764_1.1	3.3072	0.18449	1.26991	0.207496	0.499011	-0.0207695	-0.145011	0.885037	0.964808	0.0818604	0.796791	0.427737	0.809097	-0.000571123	-0.0353843	0.971854	0.987926	-0.120264	-1.19337	0.235961	0.694253	-0.20526	-1.01346	0.313644	0.58353	-0.000408331	-0.120894	0.904053	0.953774
NVEC200_000767_1.1	3.3194	0.0649093	0.477555	0.634162	0.833438	-0.0179807	-0.138815	0.889917	0.966475	0.0234643	0.243857	0.807915	0.95994	-0.0198446	-1.35949	0.177497	0.389066	0.0787689	0.874351	0.38433	0.798586	-0.0828899	-0.453078	0.651618	0.837445	0.0021249	0.695897	0.488344	0.697108
NVEC200_000768_1.1	5.97278	0.214644	2.86664	0.00520031	0.0580823	-0.274383	-3.7334	0.000336221	0.0130807	-0.0298695	-0.564055	0.574165	0.875454	-0.0195006	-2.35964	0.0205261	0.0959497	-0.058926	-1.14039	0.257246	0.711971	-0.489027	-4.70591	9.43465e-06	0.000292165	0.00195611	1.11387	0.268398	0.495314
NVEC200_000769_1.1	5.38178	0.0893414	1.05481	0.294426	0.590761	0.137628	1.64592	0.103382	0.382371	0.113485	1.89469	0.0614481	0.465905	-0.0146554	-1.5577	0.122927	0.308736	-0.090893	-1.54607	0.125711	0.574748	0.0482868	0.408367	0.684005	0.855459	0.00726105	3.65556	0.000438049	0.00601698
NVEC200_000770_1.1	5.28052	0.227386	0.958414	0.341051	0.632601	0.389929	1.70882	0.0917779	0.35888	0.308658	1.83845	0.0701076	0.480169	-0.0275868	-1.08202	0.282845	0.514469	0.190129	1.19942	0.234283	0.692705	0.162543	0.504106	0.615721	0.817041	0.0088698	1.66046	0.101157	0.272072
NVEC200_000771_1.1	6.41938	0.0905423	0.762102	0.448427	0.718251	0.240649	2.05205	0.0437096	0.243042	0.165596	1.97101	0.0524701	0.45079	-0.0120517	-0.915482	0.362919	0.596161	-0.0473839	-0.574314	0.567501	0.881695	0.150107	0.905166	0.368321	0.637228	0.00339361	1.2151	0.228199	0.447125
NVEC200_000772_1.1	4.68979	-0.219689	-2.22411	0.0287252	0.170028	0.29407	3.01362	0.00337962	0.059697	0.0371907	0.532433	0.59578	0.881461	-0.00692452	-0.630492	0.530022	0.731488	-0.064254	-0.939362	0.350141	0.776869	0.513759	3.72319	0.000348159	0.00524542	0.00316139	1.36664	0.175253	0.380899
NVEC200_000773_1.1	3.97357	-0.174545	-1.61462	0.110007	0.359198	0.0252921	0.23576	0.814172	0.938971	-0.0746264	-0.976243	0.331645	0.751705	0.00191373	0.157809	0.874972	0.943139	-0.129279	-1.70583	0.0916006	0.521466	0.199837	1.31722	0.191216	0.443524	0.00840658	3.28065	0.00149009	0.0151155
NVEC200_000774_1.1	5.63468	0.144847	1.34044	0.183946	0.46982	0.142203	1.33091	0.187048	0.510619	0.143525	1.87825	0.0640389	0.47087	-0.00796678	-0.663387	0.509015	0.717953	-0.110398	-1.46781	0.146128	0.603657	-0.00264415	-0.0175	0.986082	0.995148	0.0019492	0.768391	0.444548	0.661014
NVEC200_000775_1.1	3.25882	0.444447	3.55131	0.000620898	0.0131609	-0.107156	-0.882289	0.380047	0.707281	0.168646	1.90486	0.0600956	0.463379	0.0215706	1.58542	0.116493	0.299655	-0.0495196	-0.576747	0.565597	0.880957	-0.551603	-3.21304	0.00184134	0.0189911	-0.00292724	-1.02849	0.306564	0.536016
NVEC200_000776_1.1	2.95519	-0.124007	-0.868208	0.387665	0.672601	0.170471	1.20656	0.230866	0.563372	0.0232318	0.230012	0.818621	0.963155	-0.0111835	-0.701209	0.48504	0.698745	-0.129641	-1.31219	0.1929	0.652118	0.294477	1.47388	0.144116	0.378823	-0.00301041	-0.89949	0.37087	0.597572
NVEC200_000777_1.1	7.78431	0.0789441	1.34019	0.183668	0.469538	0.0740764	1.2766	0.205134	0.533952	0.0765102	1.83667	0.0696671	0.479364	-0.0026039	-0.400191	0.689995	0.841798	0.0915966	2.24121	0.0275528	0.356685	-0.00486776	-0.0593253	0.952829	0.983154	-0.012945	-9.31245	1.01221e-14	1.77774e-11
NVEC200_000778_1.1	5.02013	-0.00594614	-0.0582036	0.95372	0.98216	0.0587611	0.592118	0.555304	0.814605	0.0264075	0.365404	0.715695	0.923044	0.0399013	3.5694	0.000584688	0.0074163	0.0549148	0.781118	0.436849	0.825561	0.0647072	0.461265	0.645758	0.83417	-0.000642662	-0.272423	0.785941	0.89367
NVEC200_000780_1.1	3.34362	0.0781295	0.505156	0.614724	0.823697	0.112073	0.743468	0.459198	0.762579	0.0951014	0.869298	0.387072	0.786165	-0.0226017	-1.32849	0.187485	0.402247	-0.0289879	-0.275223	0.783796	0.947532	0.0339437	0.159278	0.873818	0.949473	-0.00155736	-0.438007	0.662465	0.81714
NVEC200_000781_1.1	7.43555	0.0148865	0.210242	0.83397	0.93233	0.0920929	1.31411	0.192261	0.517462	0.0534897	1.06829	0.288344	0.721682	0.00287444	0.365629	0.715529	0.857316	-0.0726578	-1.46986	0.145204	0.601666	0.0772064	0.779054	0.43806	0.699785	0.00329139	1.96229	0.0529233	0.181055
NVEC200_000782_1.1	2.88341	0.225639	1.49881	0.137536	0.403051	-0.094078	-0.659217	0.511494	0.79448	0.0657806	0.617053	0.538808	0.859009	-0.0245554	-1.52814	0.130098	0.320025	0.146996	1.48217	0.141903	0.596659	-0.319717	-1.58667	0.11621	0.335192	-0.00612794	-1.81647	0.0727358	0.220884
NVEC200_000783_1.1	4.43913	0.0820154	0.7595	0.449603	0.718686	-0.0547912	-0.528082	0.598784	0.840959	0.0136121	0.178125	0.859038	0.970968	0.0331101	2.83461	0.00570143	0.0391407	0.114154	1.55684	0.123133	0.571755	-0.136807	-0.933169	0.353311	0.62435	-0.00410339	-1.66717	0.0990696	0.268567
NVEC200_000784_1.1	10.852	0.0682598	1.02421	0.308753	0.602701	-0.0472763	-0.717066	0.475374	0.774942	0.0104917	0.222618	0.824387	0.964046	-0.0078487	-1.06218	0.291278	0.524261	-0.0181182	-0.389923	0.697606	0.924106	-0.115536	-1.23921	0.21881	0.482088	0.0034274	2.1705	0.032867	0.132829
NVEC200_000785_1.1	3.66254	0.158726	1.14645	0.254748	0.552553	0.108423	0.80123	0.425177	0.740722	0.133575	1.36405	0.176064	0.627497	-0.0120017	-0.787847	0.432923	0.658048	-0.0620294	-0.654613	0.514441	0.861654	-0.0503037	-0.26293	0.793225	0.911223	0.000298989	0.0940015	0.925324	0.96488
NVEC200_000786_1.1	2.36292	0.342461	1.7899	0.0769421	0.29404	0.0395332	0.210363	0.833876	0.947415	0.190997	1.41153	0.161648	0.61092	0.00726823	0.344298	0.731451	0.86433	-0.106742	-0.805293	0.422842	0.820834	-0.302928	-1.14	0.257411	0.527044	0.0065788	1.50034	0.13714	0.327887
NVEC200_000787_1.1	2.17796	0.358594	1.70185	0.0923484	0.327623	-0.0701016	-0.343675	0.731918	0.907376	0.144246	0.967626	0.335908	0.756007	-0.011257	-0.490326	0.625135	0.797252	-0.0585484	-0.410758	0.682258	0.920898	-0.428696	-1.48696	0.140634	0.373748	0.00427724	0.896874	0.372256	0.598864
NVEC200_000788_1.1	0.426808	-0.180255	-0.414383	0.679626	0.858542	-0.125721	-0.294497	0.769089	0.921942	-0.152988	-0.497291	0.620254	0.890875	0.0181915	0.376687	0.707335	0.852869	-0.109563	-0.360759	0.719165	0.931068	0.0545342	0.0903454	0.928223	0.973078	0.0047506	0.467845	0.64108	0.805626
NVEC200_000789_1.1	4.23537	-0.0835148	-0.726442	0.469514	0.732607	0.0997708	0.887629	0.377183	0.704725	0.00812804	0.0999603	0.920605	0.985067	-0.0100256	-0.790604	0.431321	0.656839	-0.052197	-0.662844	0.50918	0.858421	0.183286	1.15334	0.251924	0.521407	-0.000311926	-0.116946	0.907172	0.955024
NVEC200_000790_1.1	1.95722	-0.140875	-0.662861	0.509169	0.758956	0.110799	0.531006	0.596765	0.840298	-0.015038	-0.10005	0.920534	0.985067	-0.03603	-1.52438	0.131034	0.321672	-0.115576	-0.79651	0.4279	0.823289	0.251674	0.853027	0.395982	0.66442	-0.00170019	-0.344384	0.731387	0.862421
NVEC200_000791_1.1	5.22888	0.0924322	1.17788	0.242051	0.538212	-0.10471	-1.35962	0.177456	0.495378	-0.00613868	-0.110609	0.912181	0.983062	-0.00193838	-0.223328	0.823803	0.917127	-0.0435031	-0.801538	0.425	0.821792	-0.197142	-1.8104	0.0736789	0.25316	-0.00185396	-1.00779	0.316346	0.545846
NVEC200_000792_1.1	4.44634	0.0552592	0.477871	0.633938	0.833438	-0.00200836	-0.0174828	0.986091	0.995566	0.0266254	0.325618	0.745494	0.933413	-0.0310463	-2.39093	0.0189578	0.0909	-0.146764	-1.8207	0.0720837	0.487583	-0.0572676	-0.35251	0.725307	0.876873	-0.00144547	-0.527934	0.598886	0.776412
NVEC200_000793_1.1	5.42506	0.406074	5.44765	4.66258e-07	4.54935e-05	-0.241572	-3.31629	0.00133126	0.032586	0.0822509	1.56007	0.122366	0.572622	0.00646988	0.791828	0.43061	0.656082	-0.0351937	-0.685424	0.494895	0.852632	-0.647646	-6.28853	1.23686e-08	1.01375e-06	0.000393561	0.227732	0.820388	0.911313
NVEC200_000794_1.1	1.99923	-0.688463	-1.27657	0.205829	0.49773	0.162596	0.334804	0.73874	0.909025	-0.262933	-0.685666	0.495112	0.840199	-0.0327151	-0.613218	0.541652	0.740555	0.513205	1.60042	0.113858	0.559906	0.851059	1.24778	0.216129	0.478323	0.00611825	0.555336	0.580375	0.763116
NVEC200_000796_1.1	7.40942	0.029154	0.510244	0.61117	0.822249	-0.0197837	-0.35003	0.72716	0.905654	0.00468515	0.115956	0.907954	0.982173	-0.0111035	-1.75068	0.0835195	0.241455	-0.0661293	-1.66019	0.10047	0.539851	-0.0489378	-0.612284	0.541944	0.768196	0.00160792	1.18769	0.23818	0.459691
NVEC200_000797_1.1	5.68514	-0.16284	-2.64221	0.00976316	0.0876119	0.0832486	1.39213	0.167425	0.483128	-0.0397959	-0.912767	0.363883	0.773982	-0.00264162	-0.392455	0.69568	0.845545	0.110355	2.6309	0.0100687	0.24649	0.246089	2.91132	0.00456874	0.0362843	-0.00603301	-4.21611	6.05303e-05	0.00127643
NVEC200_000800_1.1	7.1393	0.0598201	0.664831	0.508112	0.758378	-0.0403507	-0.456715	0.64914	0.865204	0.00973471	0.152978	0.878809	0.97705	-0.0107541	-1.08502	0.281243	0.512693	0.0928739	1.49383	0.139239	0.592933	-0.100171	-0.801855	0.425063	0.689319	0.00149812	0.70842	0.480788	0.691323
NVEC200_000801_1.1	3.88783	-0.199117	-1.68272	0.0960083	0.333855	-0.098906	-0.873946	0.384549	0.710289	-0.149012	-1.77912	0.0787057	0.500578	-0.00441686	-0.345882	0.730265	0.864192	0.108211	1.37008	0.174182	0.635976	0.100211	0.626811	0.532421	0.762136	-0.00347884	-1.28596	0.201862	0.41472
NVEC200_000802_1.1	3.5093	0.0222499	0.173495	0.862664	0.944678	-0.155897	-1.25373	0.213293	0.542625	-0.0668237	-0.736542	0.463379	0.823542	-0.0389406	-2.76181	0.00700917	0.0452103	0.0017091	0.0196932	0.984333	0.998636	-0.178147	-1.01356	0.313598	0.58353	0.00682032	2.30187	0.0237265	0.107215
NVEC200_000803_1.1	2.06829	-0.239158	-1.19269	0.236226	0.532463	-0.0253183	-0.12607	0.899967	0.970203	-0.132238	-0.932642	0.353581	0.767134	-0.00235109	-0.103492	0.91781	0.961686	-0.254153	-1.79773	0.0756822	0.493717	0.21384	0.752927	0.453523	0.709636	0.0031959	0.669023	0.505249	0.709524
NVEC200_000804_1.1	0.1591	0.329494	0.573434	0.567966	0.795826	1.1826	2.12691	0.0365221	0.220207	0.756048	1.8598	0.0666055	0.475798	0.0486754	0.81015	0.420268	0.646898	0.232604	0.615423	0.540029	0.873914	0.853109	1.08555	0.280951	0.55088	0.0220479	1.84027	0.0694535	0.214592
NVEC200_000805_1.1	5.02842	-0.172313	-2.16108	0.0334314	0.184225	0.14982	1.94131	0.0554514	0.275888	-0.0112466	-0.199369	0.842438	0.96758	0.0120131	1.38341	0.170072	0.378779	0.0830474	1.53243	0.129037	0.578759	0.322133	2.9532	0.00404165	0.0331282	0.00404381	2.20311	0.0302246	0.125619
NVEC200_000806_1.1	5.6526	-0.0617977	-0.883687	0.379296	0.667106	0.107276	1.56035	0.1223	0.415348	0.0227391	0.459781	0.646818	0.898631	0.0233249	3.01383	0.0033775	0.0268932	-0.0365272	-0.751394	0.454439	0.833862	0.169073	1.73919	0.085532	0.275414	0.00147977	0.902139	0.369469	0.59645
NVEC200_000807_1.1	4.00603	-0.427564	-3.82177	0.000247962	0.00668518	0.162346	1.46804	0.145692	0.453537	-0.132609	-1.67619	0.097285	0.530622	0.0202434	1.62208	0.108398	0.286411	-0.108951	-1.39789	0.165694	0.625978	0.58991	3.77223	0.000294269	0.00463219	0.00121934	0.461349	0.645697	0.808189
NVEC200_000808_1.1	6.47377	-0.0225524	-0.448128	0.655172	0.846232	0.10167	2.0522	0.0431499	0.241312	0.0395589	1.11151	0.269405	0.707705	-0.00436778	-0.784463	0.434895	0.659145	-0.0177572	-0.508949	0.612074	0.900918	0.124223	1.77324	0.079682	0.265261	-0.000648961	-0.547851	0.585195	0.766914
NVEC200_000810_1.1	4.09334	-0.106216	-1.12324	0.264421	0.562616	-0.0494653	-0.547852	0.585194	0.833743	-0.0778405	-1.16289	0.248049	0.687773	-0.000671149	-0.0659691	0.947553	0.9759	0.129436	2.05136	0.043234	0.422139	0.0567504	0.444968	0.657446	0.841066	-0.0051541	-2.39643	0.0186932	0.0919256
NVEC200_000811_1.1	0.348705	0.509141	0.666785	0.507009	0.757279	1.85553	2.51359	0.0141534	0.131934	1.18233	2.18854	0.0318252	0.398606	-0.025215	-0.335585	0.738145	0.868292	0.308644	0.656969	0.513264	0.86062	1.34638	1.29047	0.200954	0.457191	0.0216172	1.49531	0.139138	0.330228
NVEC200_000812_1.1	4.88613	0.196817	2.65478	0.00943327	0.0857152	-0.124126	-1.7089	0.091027	0.357878	0.0363454	0.693171	0.490045	0.838032	-0.0247315	-3.02023	0.00331364	0.0264935	-0.0670857	-1.3168	0.191357	0.651495	-0.320942	-3.12509	0.00241442	0.0225898	0.000850123	0.491989	0.623964	0.793526
NVEC200_000814_1.1	3.59336	-0.133005	-1.13507	0.259459	0.557065	0.0987279	0.8719	0.385658	0.710885	-0.0171387	-0.206724	0.836708	0.966048	0.0228082	1.78511	0.0777222	0.230274	0.0513806	0.643947	0.521301	0.865479	0.231733	1.44802	0.1512	0.388261	-0.00505635	-1.87935	0.0635377	0.20342
NVEC200_000815_1.1	2.71017	-0.193959	-1.24541	0.216319	0.509789	0.168572	1.06064	0.291783	0.630145	-0.0126931	-0.115238	0.908521	0.982354	-0.0303819	-1.69409	0.093819	0.260012	-0.281487	-2.52931	0.0132276	0.271939	0.362531	1.61324	0.110307	0.324853	0.00643659	1.71027	0.090774	0.254731
NVEC200_000817_1.1	5.08495	-0.0434111	-0.630155	0.530242	0.770218	0.0878748	1.311	0.1933	0.519373	0.0222318	0.456219	0.649367	0.900442	0.0320361	4.24237	5.49463e-05	0.00119432	0.0439254	0.926415	0.356789	0.781186	0.131286	1.38553	0.169427	0.413982	0.000894436	0.560432	0.576622	0.760664
NVEC200_000818_1.1	2.62074	-0.0512288	-0.311048	0.756506	0.896554	-0.340998	-2.04575	0.0437956	0.243282	-0.196113	-1.68386	0.0957877	0.529792	0.0013573	0.0718993	0.942847	0.973384	-0.266509	-2.26245	0.0261552	0.348001	-0.289769	-1.22933	0.222257	0.486049	-0.00650604	-1.60854	0.111334	0.288217
NVEC200_000819_1.1	5.67715	0.0293951	0.33919	0.735283	0.88763	-0.0655251	-0.769256	0.443821	0.752912	-0.018065	-0.294751	0.768885	0.943098	-0.00840144	-0.875789	0.383552	0.614703	-0.0494611	-0.824895	0.411683	0.813449	-0.0949202	-0.788086	0.432784	0.696238	0.00233515	1.14648	0.254736	0.479076
NVEC200_000820_1.1	2.38121	-0.102957	-0.595998	0.552721	0.785748	0.140754	0.831098	0.408189	0.727497	0.0188982	0.154681	0.877431	0.976694	0.0248529	1.29953	0.197187	0.413619	-0.0483825	-0.40366	0.687451	0.922378	0.243711	1.01775	0.311613	0.582302	0.0011471	0.287219	0.774626	0.888392
NVEC200_000821_1.1	3.65142	-0.496256	-4.25363	5.27089e-05	0.00202501	0.417919	3.76382	0.000302913	0.0122099	-0.0391682	-0.47421	0.636536	0.895396	0.036186	2.91964	0.00445928	0.0329264	0.196277	2.54808	0.012584	0.265366	0.914175	5.82961	9.19207e-08	5.77677e-06	-0.00460744	-1.77399	0.0795565	0.234155
NVEC200_000822_1.1	6.34041	-0.0274938	-0.497954	0.619771	0.826643	0.00949073	0.174916	0.861551	0.957528	-0.00900155	-0.230526	0.818223	0.963155	-0.0150609	-2.46807	0.0155374	0.0800478	-0.013514	-0.354071	0.724141	0.931586	0.0369846	0.482063	0.63097	0.826078	0.000649958	0.500445	0.618023	0.789328
NVEC200_000823_1.1	3.33049	0.14666	1.10747	0.271138	0.570103	-0.333982	-2.60485	0.0108059	0.114622	-0.0936613	-0.999696	0.320225	0.745331	-0.0180929	-1.24962	0.214785	0.436657	0.000964457	0.0107408	0.991455	0.999586	-0.480642	-2.65221	0.00949974	0.0617087	-0.00502195	-1.63367	0.105936	0.2796
NVEC200_000824_1.1	1.30686	-0.126677	-0.333269	0.739814	0.889223	0.631505	1.64152	0.104666	0.384797	0.252414	0.939065	0.35056	0.764741	0.021594	0.508197	0.612732	0.789036	-0.0848302	-0.319857	0.749921	0.938266	0.758182	1.39366	0.167328	0.411097	-0.00937943	-1.06589	0.289721	0.518688
NVEC200_000825_1.1	1.19498	-0.0251284	-0.0897796	0.928668	0.97298	-0.285471	-1.07775	0.284118	0.622185	-0.1553	-0.783495	0.43546	0.811272	0.0177799	0.595858	0.552814	0.748079	0.0754596	0.407132	0.684909	0.921457	-0.260343	-0.696191	0.488161	0.733444	-0.00157787	-0.250289	0.802953	0.903355
NVEC200_000826_1.1	2.68986	0.292062	1.59608	0.11409	0.365838	-0.0370951	-0.214088	0.830978	0.946368	0.127483	0.983785	0.327944	0.749679	0.0240892	1.24066	0.218059	0.44128	0.136148	1.11438	0.268181	0.720724	-0.329157	-1.34552	0.181948	0.431262	-0.00269182	-0.664688	0.508005	0.711932
NVEC200_000827_1.1	3.6144	0.18488	1.538	0.12767	0.387263	-0.0036855	-0.0321776	0.974404	0.991584	0.0905972	1.06461	0.289994	0.72221	0.0170016	1.32222	0.189553	0.404436	0.120917	1.50241	0.136605	0.590057	-0.188565	-1.16564	0.246938	0.515385	-0.00865041	-3.20349	0.00189678	0.0182465
NVEC200_000828_1.1	4.35185	0.00617388	0.0582523	0.953681	0.98216	-0.16917	-1.66877	0.0987504	0.372404	-0.0814982	-1.08639	0.2803	0.718086	0.0239178	2.09551	0.0390256	0.148293	0.140602	1.96627	0.0524501	0.442931	-0.175344	-1.22439	0.224102	0.488929	0.00582587	2.41546	0.0178038	0.089084
NVEC200_000829_1.1	4.77369	-0.107944	-1.24773	0.215472	0.508997	-0.130233	-1.56548	0.121094	0.413421	-0.119088	-1.94524	0.0549692	0.453009	-0.0154062	-1.6424	0.104111	0.278854	0.106887	1.83776	0.0695048	0.482023	-0.0222889	-0.189611	0.850055	0.939171	0.00278456	1.39961	0.165179	0.368282
NVEC200_000830_1.1	7.57963	0.109785	2.41931	0.0176284	0.12511	0.0179653	0.399972	0.690156	0.886601	0.0638752	1.99055	0.0496634	0.443722	-0.0076083	-1.51016	0.134619	0.328086	-0.0729312	-2.30322	0.023647	0.338538	-0.0918198	-1.44557	0.151883	0.389335	0.000389786	0.362597	0.717784	0.853629
NVEC200_000831_1.1	3.73556	-0.0605389	-0.490494	0.625017	0.828887	-0.00824851	-0.0674036	0.946415	0.984951	-0.0343937	-0.394073	0.694489	0.916171	-0.042037	-3.02571	0.0032599	0.0262961	-0.151097	-1.76708	0.0807152	0.503714	0.0522904	0.302156	0.763253	0.896081	0.00207474	0.710175	0.479491	0.690255
NVEC200_000832_1.1	1.26328	-0.0269618	-0.116022	0.907902	0.962999	-0.404145	-1.65423	0.101678	0.378683	-0.215553	-1.31013	0.193592	0.639964	0.0105247	0.38335	0.702394	0.849423	-0.477004	-2.75511	0.00714233	0.211976	-0.377183	-1.09292	0.277439	0.547399	0.012976	2.21175	0.0295992	0.124001
NVEC200_000834_1.1	3.60683	0.039997	0.317134	0.7519	0.895203	0.0607673	0.50202	0.616919	0.851304	0.0503822	0.564469	0.573885	0.875369	-0.0247518	-1.81314	0.0732525	0.22187	0.0747415	0.88845	0.376744	0.795139	0.0207703	0.121445	0.903618	0.962985	-0.00412623	-1.44336	0.152504	0.349597
NVEC200_000835_1.1	5.00961	0.0451795	0.503151	0.616127	0.824639	0.0295745	0.333039	0.739905	0.909548	0.037377	0.58864	0.557625	0.867865	0.00620149	0.619489	0.53721	0.737392	-0.132948	-2.12017	0.036834	0.398976	-0.015605	-0.124266	0.901391	0.962147	-0.000952425	-0.450087	0.653765	0.813216
NVEC200_000836_1.1	2.70321	1.12846	4.93855	3.90845e-06	0.000274575	-0.411026	-1.89575	0.0614044	0.291132	0.358718	2.21708	0.0292973	0.398606	0.000708767	0.0303943	0.975824	0.98967	0.0234088	0.157052	0.875578	0.975916	-1.53949	-5.02853	2.72828e-06	0.000103845	0.00524195	1.08313	0.281826	0.510452
NVEC200_000837_1.1	4.02326	-0.00460455	-0.0493221	0.960775	0.985464	-0.0319614	-0.355263	0.723251	0.9049	-0.018283	-0.27677	0.782612	0.949258	-0.00676405	-0.666446	0.506886	0.71597	0.0566369	0.899416	0.370909	0.790561	-0.0273569	-0.215177	0.830132	0.928249	-0.0057381	-2.67853	0.00883756	0.0548839
NVEC200_000838_1.1	5.7544	-0.062794	-0.690813	0.491547	0.74891	0.0854096	0.955992	0.341761	0.675448	0.0113078	0.175902	0.860786	0.971495	-0.00801649	-0.796971	0.427667	0.653541	-0.0356903	-0.567983	0.571529	0.884407	0.148204	1.17316	0.243976	0.511895	0.000997977	0.467674	0.641203	0.805698
NVEC200_000839_1.1	2.97361	-0.181972	-1.27655	0.205151	0.496481	0.0875624	0.645868	0.520062	0.798225	-0.0472047	-0.467721	0.641151	0.89751	0.0173307	1.13602	0.25906	0.489195	0.132211	1.39631	0.166167	0.625978	0.269534	1.40777	0.162755	0.404571	-0.00462699	-1.44566	0.151859	0.348488
NVEC200_000840_1.1	3.66446	0.174659	1.29132	0.200006	0.49103	0.25654	1.97554	0.0513706	0.265134	0.215599	2.2524	0.0268085	0.388254	-0.0216522	-1.48751	0.140488	0.337467	0.0994146	1.10431	0.272496	0.722278	0.0818814	0.446265	0.656513	0.840447	0.00730042	2.42159	0.0175253	0.0880974
NVEC200_000841_1.1	2.22587	-0.0556648	-0.279671	0.780392	0.907419	0.0135508	0.0697366	0.944563	0.984273	-0.021057	-0.149573	0.881447	0.977497	0.0300142	1.36383	0.176134	0.386953	-0.0770754	-0.558771	0.577751	0.886197	0.0692156	0.25195	0.801672	0.914957	-0.00777589	-1.67429	0.0976585	0.265917
NVEC200_000842_1.1	1.74401	0.171923	0.705268	0.482524	0.741797	-0.175072	-0.709232	0.480073	0.777297	-0.00157432	-0.00913259	0.992734	0.998134	-0.0173289	-0.621685	0.535772	0.736659	-0.258668	-1.4973	0.137927	0.590495	-0.346995	-0.994063	0.322944	0.593286	0.00175314	0.299309	0.765416	0.882537
NVEC200_000843_1.1	4.35479	-0.10657	-1.15215	0.252409	0.549905	0.0988543	1.09069	0.278413	0.617613	-0.00385806	-0.0589749	0.953107	0.991437	-0.0018865	-0.184491	0.854057	0.933935	-0.0539257	-0.846915	0.399362	0.806758	0.205425	1.60302	0.112548	0.328974	0.00424699	1.97139	0.0518516	0.178461
NVEC200_000844_1.1	4.41309	-0.257358	-2.85387	0.00539494	0.0596452	0.235549	2.6699	0.00905007	0.103983	-0.0109049	-0.170973	0.864641	0.972412	0.00253431	0.255038	0.799295	0.902013	-0.0178471	-0.288963	0.773295	0.944299	0.492907	3.9516	0.000157291	0.00282415	-0.00230093	-1.09757	0.275414	0.503336
NVEC200_000845_1.1	4.78924	-0.0232693	-0.265641	0.791143	0.912412	0.115084	1.35333	0.179451	0.49796	0.0459075	0.740834	0.460785	0.822092	-0.00297687	-0.310732	0.756746	0.877517	0.0406973	0.682191	0.496927	0.853801	0.138354	1.15097	0.252892	0.522514	-0.00234974	-1.16192	0.248438	0.471344
NVEC200_000846_1.1	9.1193	0.141111	2.16134	0.0334187	0.184225	0.0898028	1.3948	0.166631	0.482395	0.115457	2.50066	0.0142722	0.322145	-0.0178989	-2.48172	0.0149992	0.0780362	0.145652	3.21402	0.00183737	0.110729	-0.0513084	-0.563559	0.574505	0.790218	-0.00150401	-0.9765	0.331527	0.560786
NVEC200_000847_1.1	3.72453	0.0411754	0.414725	0.679362	0.858358	-0.0552416	-0.57652	0.565749	0.821656	-0.0070331	-0.100117	0.920481	0.985067	0.00839543	0.776505	0.439553	0.662354	0.0373306	0.554036	0.580973	0.887374	-0.0964171	-0.712003	0.478364	0.727758	-0.00289794	-1.27183	0.206817	0.420754
NVEC200_000848_1.1	4.70378	0.0458397	0.495443	0.621534	0.827244	0.00076769	0.00849102	0.993245	0.997231	0.0233037	0.356104	0.722623	0.925246	-0.0229874	-2.25161	0.026861	0.114982	-0.0350031	-0.552368	0.58211	0.887748	-0.045072	-0.352604	0.725237	0.876873	-0.00661805	-3.06566	0.00289144	0.0247717
NVEC200_000851_1.1	1.1096	-0.0982781	-0.313802	0.754421	0.895921	-0.00914608	-0.0302737	0.975918	0.991729	-0.0537121	-0.242385	0.809052	0.960529	-0.012039	-0.352963	0.724968	0.861872	0.0124695	0.0591614	0.952959	0.992265	0.089132	0.208762	0.835121	0.931245	-0.00318855	-0.446855	0.656088	0.814084
NVEC200_000852_1.1	4.34549	0.133639	0.67487	0.501886	0.754579	0.105316	0.543328	0.588556	0.835725	0.119477	0.853079	0.396401	0.791914	-0.0128687	-0.589599	0.557277	0.751341	-0.0503963	-0.369749	0.712638	0.929173	-0.0283228	-0.103346	0.917971	0.969966	0.0113892	2.48495	0.0152448	0.0799915
NVEC200_000853_1.1	2.14566	-0.44252	-1.9359	0.0561206	0.248808	-0.252942	-1.09413	0.276913	0.616063	-0.347731	-2.1512	0.0342269	0.40205	0.0378844	1.44662	0.15159	0.352991	-0.285311	-1.72587	0.0879132	0.51717	0.189578	0.579893	0.563483	0.784004	0.0144252	2.57173	0.0118135	0.0670212
NVEC200_000854_1.1	4.86211	0.350194	4.37172	3.39484e-05	0.0015013	-0.295577	-3.75901	0.000307957	0.0123726	0.0273089	0.482044	0.630983	0.894557	-0.048426	-5.46309	4.37036e-07	2.47889e-05	-0.106045	-1.92847	0.0570516	0.454177	-0.645771	-5.80824	1.00782e-07	6.25764e-06	0.00394525	2.11254	0.0375007	0.144661
NVEC200_000856_1.1	5.37488	-0.00916075	-0.144849	0.885165	0.953738	0.0764806	1.24197	0.217579	0.546906	0.0336599	0.752414	0.453829	0.816707	-0.0245315	-3.53564	0.000653963	0.00808835	0.0420086	0.974427	0.332541	0.764175	0.0856414	0.983765	0.327954	0.598204	-0.00554602	-3.77554	0.000290935	0.00439405
NVEC200_000857_1.1	6.26342	-0.03051	-0.396653	0.692593	0.86586	0.110062	1.4547	0.149343	0.45961	0.0397761	0.731218	0.466607	0.825748	-0.0228017	-2.67995	0.00880308	0.0533128	-0.0147515	-0.277493	0.782058	0.947067	0.140572	1.31396	0.192308	0.444822	0.00395796	2.18913	0.0312599	0.128495
NVEC200_000858_1.1	5.59762	0.188106	3.27515	0.00151611	0.025188	-0.0989785	-1.76201	0.0815739	0.338008	0.0445638	1.09703	0.275649	0.712987	-0.0196193	-3.10429	0.00257241	0.0221776	-0.0197347	-0.500258	0.618154	0.902038	-0.287085	-3.61471	0.000502582	0.00697375	-0.00343893	-2.56855	0.0119144	0.0673997
NVEC200_000859_1.1	5.67169	0.0325205	0.456617	0.649082	0.842375	0.0162551	0.233118	0.816216	0.939995	0.0243878	0.484156	0.629489	0.894557	-0.0031375	-0.399926	0.690189	0.841952	-0.00717476	-0.146227	0.88408	0.97699	-0.0162653	-0.164981	0.869341	0.947704	0.00159199	0.957429	0.340999	0.569327
NVEC200_000860_1.1	2.3759	0.486207	2.74828	0.00728047	0.0721242	0.170553	1.02337	0.308965	0.645661	0.32838	2.62033	0.0103623	0.305362	0.00921789	0.499417	0.618744	0.79337	0.1339	1.15869	0.249748	0.70649	-0.315654	-1.34198	0.183087	0.432947	-0.00799321	-2.09698	0.038892	0.148076
NVEC200_000861_1.1	6.17876	0.15309	2.21332	0.0294871	0.172605	-0.0985584	-1.45759	0.148548	0.458164	0.0272656	0.557336	0.578727	0.876863	-0.0228276	-3.00446	0.00347308	0.0274409	0.0438745	0.924153	0.357958	0.781658	-0.251648	-2.63231	0.0100302	0.0642917	0.00664286	4.11358	8.80227e-05	0.00171226
NVEC200_000863_1.1	3.50659	-0.231225	-1.75188	0.0833115	0.307577	0.353431	2.78195	0.00662239	0.087638	0.0611031	0.654231	0.514685	0.850631	0.0319991	2.24696	0.0271682	0.115709	0.116669	1.31005	0.19362	0.653294	0.584656	3.25666	0.00160685	0.0170592	0.00529279	1.78293	0.0780791	0.231581
NVEC200_000864_1.1	5.12352	0.106674	1.49176	0.139372	0.40507	-0.102648	-1.44621	0.151705	0.462403	0.00201303	0.0398103	0.968335	0.994538	0.00126556	0.158239	0.874634	0.943016	-0.171074	-3.40927	0.000988448	0.0832076	-0.209321	-2.08542	0.0399555	0.168976	0.00948038	5.59698	2.4847e-07	1.75557e-05
NVEC200_000865_1.1	3.84957	0.0929122	0.806859	0.421944	0.697418	-0.0534336	-0.474643	0.636228	0.859537	0.0197393	0.242359	0.809071	0.960529	-0.00928938	-0.730411	0.467097	0.685753	-0.083571	-1.05712	0.293376	0.734591	-0.146346	-0.919463	0.360391	0.630338	0.000227388	0.0849236	0.932517	0.968029
NVEC200_000866_1.1	6.66421	-0.0133389	-0.17981	0.857719	0.942863	0.163093	2.24739	0.0271396	0.184953	0.0748769	1.42709	0.157127	0.608764	0.0148044	1.8168	0.0726841	0.220923	0.116233	2.274	0.0254223	0.343166	0.176432	1.71955	0.0890628	0.282419	-0.0100073	-5.76463	1.21553e-07	9.89654e-06
NVEC200_000867_1.1	7.99078	0.0129046	0.317455	0.751658	0.895203	0.0852045	2.11862	0.0369685	0.221208	0.0490545	1.7065	0.0914749	0.525012	-0.0146503	-3.24889	0.00164646	0.0160012	-0.0334981	-1.18204	0.240406	0.698216	0.0722999	1.27127	0.207014	0.465869	0.0038609	4.00801	0.000128703	0.00231543
NVEC200_000868_1.1	3.97492	-0.243682	-2.5688	0.0119066	0.0982418	0.169072	1.83674	0.0696568	0.309603	-0.0373053	-0.555897	0.579705	0.876987	0.0223579	2.15427	0.0339783	0.135187	0.00286736	0.0442881	0.964776	0.995784	0.412754	3.17221	0.00208945	0.0208673	-0.00151531	-0.692776	0.490292	0.69821
NVEC200_000869_1.1	6.29141	0.120962	1.80924	0.0738615	0.286995	0.081645	1.24605	0.216086	0.545495	0.101303	2.14239	0.0349505	0.405445	0.0103734	1.40937	0.162283	0.367354	0.0343259	0.743186	0.459368	0.836538	-0.0393166	-0.424383	0.672332	0.84994	-0.00653782	-4.18217	6.85562e-05	0.00140472
NVEC200_000870_1.1	3.06326	-0.122059	-0.619382	0.537326	0.775536	-0.227339	-1.22835	0.222716	0.553894	-0.174699	-1.25123	0.214294	0.659624	0.0133997	0.643574	0.52159	0.72728	0.183489	1.41632	0.160349	0.623442	-0.105281	-0.403142	0.687859	0.858009	-0.00270682	-0.61171	0.542367	0.73734
NVEC200_000871_1.1	4.48696	0.0734118	0.807467	0.421595	0.697235	-0.0531176	-0.594515	0.553708	0.813701	0.0101471	0.157815	0.874967	0.975469	-0.00532891	-0.528451	0.598529	0.779648	-0.080324	-1.27697	0.205003	0.661574	-0.126529	-1.00154	0.319338	0.589126	-0.000381715	-0.179273	0.85814	0.930534
NVEC200_000872_1.1	1.64091	-0.114203	-0.448062	0.65522	0.846232	-0.175142	-0.71921	0.473935	0.773743	-0.144672	-0.801881	0.424803	0.809097	-0.0355025	-1.28835	0.201034	0.419171	0.0733247	0.433618	0.665637	0.915373	-0.0609393	-0.177151	0.8598	0.943259	-0.00263316	-0.453763	0.651127	0.811861
NVEC200_000873_1.1	2.57807	0.0660434	0.401583	0.688974	0.864311	0.015325	0.0981893	0.922007	0.976748	0.0406842	0.349374	0.727651	0.925778	-0.0106162	-0.604223	0.547265	0.744057	0.13172	1.21283	0.228472	0.686923	-0.0507184	-0.230132	0.818528	0.922359	-0.000754973	-0.205832	0.837402	0.91961
NVEC200_000874_1.1	2.37357	0.141494	0.815208	0.417175	0.694508	0.208442	1.22796	0.222768	0.553894	0.174968	1.42527	0.157649	0.608994	0.0401963	2.1058	0.0380981	0.145782	-0.0348283	-0.28906	0.773222	0.944299	0.0669489	0.278958	0.780938	0.905548	-0.00486605	-1.22836	0.222618	0.440082
NVEC200_000875_1.1	4.4524	-0.0561522	-0.627024	0.532282	0.771417	-0.0154197	-0.176606	0.860227	0.95695	-0.035786	-0.564944	0.573563	0.875369	0.00859633	0.872401	0.385386	0.61582	-0.00743791	-0.120886	0.904059	0.982111	0.0407325	0.329992	0.742198	0.88623	0.00441361	2.12058	0.0367982	0.143209
NVEC200_000876_1.1	6.99531	-0.203953	-3.45693	0.000846797	0.0165246	0.00322495	0.0553978	0.955948	0.987195	-0.100364	-2.40555	0.0182621	0.34357	0.00235375	0.359942	0.719761	0.859853	-0.026716	-0.650894	0.516827	0.862143	0.207178	2.51674	0.0136746	0.0794124	0.00531446	3.80287	0.000264737	0.00408879
NVEC200_000878_1.1	6.24575	0.468993	5.77899	1.14284e-07	1.405e-05	-0.359712	-4.52629	1.88951e-05	0.00170806	0.0546404	0.951963	0.343748	0.760352	-0.0298144	-3.34574	0.00121214	0.0128355	-0.0116664	-0.209179	0.834797	0.965333	-0.828704	-7.37517	8.9643e-11	1.41291e-08	0.004339	2.29358	0.0242199	0.108552
NVEC200_000879_1.1	2.12553	-0.279472	-1.4665	0.146112	0.415713	-0.0832945	-0.458899	0.647449	0.865012	-0.181383	-1.34443	0.182298	0.631031	-0.0372954	-1.81225	0.073391	0.222124	-0.0255584	-0.204123	0.838733	0.966514	0.196178	0.765256	0.446186	0.705248	-0.00168331	-0.388868	0.698322	0.840372
NVEC200_000881_1.1	2.43631	0.552097	3.17157	0.00209358	0.0315809	-0.16583	-1.0053	0.317533	0.652937	0.193134	1.56675	0.120795	0.569424	-0.0512266	-2.77635	0.00672785	0.0441367	0.0589691	0.518667	0.605307	0.897318	-0.717927	-3.08251	0.00274799	0.0249143	0.00546872	1.43706	0.15428	0.352178
NVEC200_000882_1.1	9.71147	0.0630139	0.947174	0.346246	0.638192	0.000503544	0.00767252	0.993896	0.997298	0.0317587	0.675042	0.501488	0.84428	-0.0174857	-2.37759	0.0196784	0.0932517	0.107071	2.31727	0.022903	0.335572	-0.0625103	-0.673564	0.502423	0.743141	0.0021629	1.37654	0.172283	0.377091
NVEC200_000883_1.1	2.96035	-0.211492	-1.36691	0.175168	0.458194	0.208411	1.38311	0.170165	0.48724	-0.00154048	-0.0140755	0.988802	0.996666	-0.0164509	-0.967496	0.335973	0.569639	-0.023174	-0.221172	0.825476	0.962116	0.419904	1.97119	0.0518739	0.201052	-0.00384647	-1.07949	0.283349	0.511994
NVEC200_000884_1.1	4.05567	-0.167063	-1.34957	0.18065	0.465449	-0.0932309	-0.757137	0.45101	0.757077	-0.130147	-1.48681	0.140673	0.591711	-0.00684638	-0.491353	0.624412	0.796981	-0.174736	-2.01483	0.0470047	0.432572	0.0738324	0.423987	0.67262	0.850033	-0.00263751	-0.892005	0.374846	0.601506
NVEC200_000885_1.1	1.78823	-0.0360969	-0.195901	0.845144	0.938035	0.1509	0.823799	0.412302	0.730276	0.0574016	0.440553	0.660627	0.903768	-0.0249187	-1.20335	0.232098	0.458684	-0.124952	-0.979537	0.330026	0.761849	0.186997	0.72187	0.472306	0.723782	0.00374254	0.867809	0.387882	0.612455
NVEC200_000886_1.1	5.13214	-0.135593	-1.26666	0.208785	0.500762	0.0851361	0.8073	0.421779	0.737782	-0.0252286	-0.33326	0.73977	0.930034	-0.0246039	-2.06708	0.041813	0.155255	-0.0929603	-1.25654	0.212411	0.669241	0.220729	1.48019	0.142574	0.376865	0.00618076	2.45373	0.01621	0.0834532
NVEC200_000887_1.1	3.69624	-0.0535533	-0.50274	0.616415	0.824704	0.14302	1.37541	0.172527	0.488861	0.0447334	0.593714	0.554241	0.865689	-0.00179392	-0.15299	0.87876	0.944869	-0.0120116	-0.164586	0.869651	0.973739	0.196573	1.33715	0.184654	0.434724	0.00342703	1.39472	0.166646	0.370679
NVEC200_000888_1.1	4.37634	0.0545885	0.592568	0.555005	0.787356	0.0258336	0.287767	0.774208	0.924628	0.0402111	0.617096	0.53878	0.859009	0.0246553	2.43643	0.0168674	0.0846128	-0.0117321	-0.184894	0.853742	0.969905	-0.0287548	-0.22657	0.821288	0.923925	-0.00497818	-2.33448	0.0218696	0.10192
NVEC200_000889_1.1	3.79616	0.188816	1.62719	0.107307	0.354775	0.0800964	0.722963	0.471638	0.772024	0.134456	1.63692	0.105253	0.54071	0.0194288	1.56421	0.121392	0.306501	0.0987911	1.27131	0.206999	0.664055	-0.10872	-0.694719	0.489079	0.734425	-0.00498946	-1.91908	0.0582456	0.191259
NVEC200_000890_1.1	3.67814	0.103701	0.898389	0.371453	0.6615	-0.095143	-0.866851	0.388404	0.713224	0.00427879	0.052356	0.958365	0.9929	-0.0152318	-1.23296	0.220907	0.445018	0.135062	1.76746	0.0806517	0.503714	-0.198844	-1.28285	0.202944	0.459692	-0.00317429	-1.22141	0.225222	0.442757
NVEC200_000891_1.1	3.39083	0.20449	1.69876	0.0929308	0.328585	-0.253818	-2.20378	0.0301753	0.1967	-0.024664	-0.289478	0.772903	0.944703	-0.0195439	-1.50652	0.135549	0.329401	0.0554405	0.68955	0.492309	0.851384	-0.458307	-2.81678	0.00599912	0.0439531	-0.00546478	-1.9948	0.0491891	0.17278
NVEC200_000892_1.1	6.12746	0.0398628	0.624167	0.534148	0.772992	-0.130509	-2.0845	0.0400406	0.230674	-0.0453231	-1.00342	0.318436	0.744958	-0.00275121	-0.390765	0.696924	0.846472	-0.00184866	-0.0419212	0.966657	0.995985	-0.170372	-1.92457	0.0575452	0.214577	0.00415288	2.77139	0.00682273	0.0457354
NVEC200_000893_1.1	4.11454	-0.17694	-1.49848	0.137622	0.40308	0.32456	2.82114	0.0059251	0.0822158	0.0738101	0.883709	0.379284	0.780376	0.02385	1.84427	0.0685405	0.212305	0.0246631	0.305026	0.761073	0.941596	0.5015	3.08347	0.00274002	0.0248787	0.000716427	0.264443	0.792062	0.897335
NVEC200_000894_1.1	5.20407	-0.00841759	-0.0828618	0.934155	0.97475	-0.194478	-1.94285	0.0553287	0.275607	-0.101448	-1.41214	0.161542	0.61092	0.0144987	1.28361	0.202749	0.421132	-0.122375	-1.72804	0.0875959	0.51716	-0.186061	-1.31449	0.192201	0.444744	-0.00341914	-1.42382	0.15814	0.357516
NVEC200_000895_1.1	1.43235	0.584626	2.38324	0.0193331	0.132857	0.182247	0.774626	0.440657	0.751065	0.383437	2.2086	0.0298257	0.398606	-0.013144	-0.503413	0.615944	0.791514	-0.0154894	-0.0952118	0.924365	0.98648	-0.40238	-1.21051	0.229357	0.495343	-0.00896999	-1.65759	0.100995	0.271871
NVEC200_000896_1.1	2.58958	0.124368	0.716305	0.475718	0.736121	0.109467	0.655568	0.513828	0.795793	0.116918	0.951594	0.343934	0.760353	-0.00734049	-0.390318	0.697253	0.846537	0.0549361	0.469882	0.639613	0.908556	-0.0149014	-0.0631547	0.949788	0.981905	-0.00950662	-2.41065	0.0180248	0.0897889
NVEC200_000898_1.1	5.22755	0.571276	2.30146	0.0242532	0.153222	-0.882235	-3.72192	0.000388486	0.0140159	-0.155479	-0.884872	0.379162	0.780376	-0.0253386	-0.963269	0.338627	0.572244	0.173423	1.0559	0.294534	0.736276	-1.45351	-4.34105	4.53944e-05	0.00105697	0.0115856	2.07064	0.041967	0.1562
NVEC200_000899_1.1	5.1302	-0.00686457	-0.104309	0.917164	0.966688	0.079917	1.25303	0.213546	0.542874	0.0365262	0.784536	0.434853	0.811272	0.0162205	2.26101	0.0262484	0.113157	0.0797449	1.77594	0.0792327	0.501848	0.0867816	0.962636	0.338393	0.608841	7.58156e-05	0.0500414	0.960204	0.98118
NVEC200_000900_1.1	2.98213	-0.158823	-1.21458	0.227805	0.523482	-0.0295834	-0.23797	0.812462	0.93834	-0.0942034	-1.01751	0.311727	0.739984	0.0248139	1.76976	0.0802643	0.234998	0.105275	1.20467	0.231592	0.689893	0.12924	0.736164	0.463607	0.718677	-0.00534491	-1.80904	0.0738919	0.22331
NVEC200_000901_1.1	6.51885	-0.146571	-2.45485	0.0160813	0.118869	0.0641115	1.08887	0.279211	0.618258	-0.0412299	-0.976474	0.331532	0.751586	0.00677831	1.0239	0.308716	0.541473	-0.0391958	-0.943738	0.347912	0.77444	0.210683	2.53046	0.0131873	0.0772669	0.00334708	2.37176	0.0199055	0.0957427
NVEC200_000902_1.1	-0.568775	0.277462	0.497413	0.62015	0.826643	0.994053	1.82482	0.0714538	0.314294	0.635757	1.61138	0.110712	0.550828	0.0406983	0.678299	0.499379	0.710472	0.0758491	0.199682	0.842194	0.968197	0.716591	0.930454	0.354706	0.625339	0.0182954	1.50143	0.136858	0.327532
NVEC200_000903_1.1	5.62378	-0.073938	-1.01589	0.312494	0.605389	-0.0432496	-0.608195	0.54464	0.81016	-0.0585938	-1.13823	0.258145	0.700118	-0.00302656	-0.377814	0.706487	0.852361	0.0135591	0.271031	0.787008	0.949197	0.0306884	0.305241	0.760911	0.895384	-0.00163016	-0.957568	0.340929	0.569327
NVEC200_000904_1.1	2.55477	0.125296	0.878357	0.382165	0.668802	0.11123	0.792762	0.430069	0.74302	0.118263	1.1723	0.244271	0.682774	-0.0408881	-2.57485	0.0117151	0.0653471	-0.113103	-1.15964	0.249363	0.706473	-0.014066	-0.0708986	0.943641	0.979105	0.00013104	0.0397506	0.968383	0.985212
NVEC200_000905_1.1	1.38612	-0.414929	-1.70076	0.0925524	0.327874	0.432801	1.81834	0.0724467	0.317187	0.00893607	0.0517845	0.958819	0.9929	0.00122117	0.0458779	0.963513	0.984124	0.0482923	0.292012	0.770972	0.944205	0.847731	2.51924	0.0135849	0.0791153	0.0148522	2.6924	0.00850568	0.0535426
NVEC200_000906_1.1	6.23791	-0.284307	-3.86297	0.000214823	0.00598874	0.094959	1.32871	0.187412	0.511215	-0.0946738	-1.81841	0.0724362	0.487823	0.0413081	5.1389	1.67239e-06	7.41112e-05	0.160759	3.18708	0.00199566	0.11666	0.379266	3.75423	0.000313054	0.00485332	-0.00254482	-1.48538	0.141051	0.332644
NVEC200_000907_1.1	3.44426	-0.192419	-1.6931	0.0940074	0.330208	0.149017	1.34901	0.180827	0.500609	-0.0217009	-0.26993	0.787852	0.950992	0.0117729	0.944531	0.347509	0.58142	-0.0130774	-0.168704	0.86642	0.97232	0.341437	2.18655	0.0314541	0.143009	-0.00284917	-1.0862	0.280387	0.509169
NVEC200_000909_1.1	4.15299	0.0250775	0.217388	0.828414	0.930202	-0.0124065	-0.109896	0.912744	0.973584	0.00633548	0.0776506	0.938284	0.988301	-0.0272251	-2.13226	0.035798	0.139892	-0.0557747	-0.704508	0.482994	0.847187	-0.037484	-0.234839	0.814885	0.920621	0.00864626	3.21255	0.00184411	0.0178938
NVEC200_000910_1.1	7.85969	-0.083899	-2.27757	0.0251993	0.157339	0.038655	1.06019	0.291986	0.630369	-0.022622	-0.868435	0.387541	0.786339	0.00203259	0.496947	0.620477	0.793921	-0.0532132	-2.06925	0.0414833	0.415429	0.122554	2.37692	0.0196463	0.103795	0.000689916	0.789293	0.432083	0.650672
NVEC200_000911_1.1	3.99097	0.00714923	0.0682409	0.94575	0.979073	-0.21092	-2.05991	0.0423892	0.238723	-0.101885	-1.37499	0.172659	0.62468	0.0286951	2.47925	0.0150905	0.0783407	-0.0591525	-0.813981	0.417874	0.819008	-0.218069	-1.50636	0.135589	0.365957	0.00254736	1.0403	0.301079	0.530377
NVEC200_000912_1.1	4.10857	0.031373	0.313663	0.754526	0.895921	0.0324926	0.333874	0.739277	0.909211	0.0319328	0.451333	0.65287	0.901133	-0.0244683	-2.22685	0.0285343	0.119736	-0.00196521	-0.028874	0.977031	0.997669	0.00111964	0.00813828	0.993525	0.997437	-0.000440908	-0.19092	0.849032	0.924617
NVEC200_000913_1.1	5.28236	0.0403598	0.580375	0.563159	0.791836	0.0320114	0.465907	0.642444	0.862261	0.0361856	0.735832	0.463808	0.823543	-0.0161444	-2.085	0.0399944	0.150733	-0.107468	-2.22383	0.0287451	0.364322	-0.00834841	-0.0859241	0.931724	0.974115	0.00594442	3.63023	0.000477065	0.00643097
NVEC200_000914_1.1	0.51033	0.973806	1.41073	0.162553	0.440195	1.55902	2.29154	0.0248065	0.175372	1.26641	2.59428	0.0114405	0.310463	0.100148	1.39067	0.168534	0.376719	0.0718157	0.154279	0.877814	0.976166	0.58521	0.608305	0.544865	0.770305	0.024225	1.70645	0.0921574	0.256822
NVEC200_000915_1.1	1.8231	-0.0963809	-0.428614	0.669262	0.853035	-0.32464	-1.53564	0.128249	0.426365	-0.21051	-1.3214	0.189827	0.636497	-0.0524756	-2.1938	0.0309107	0.126503	0.157596	1.08495	0.280937	0.72743	-0.228259	-0.765144	0.446252	0.705261	0.0005758	0.113956	0.909534	0.956283
NVEC200_000916_1.1	0.751514	0.524174	1.43578	0.154644	0.428334	-0.0307012	-0.089559	0.928843	0.979029	0.246737	0.953885	0.342779	0.759702	-0.0480853	-1.25893	0.211418	0.431962	0.210231	0.890347	0.375731	0.794859	-0.554875	-1.14715	0.25446	0.523612	0.00888668	1.12785	0.262479	0.487891
NVEC200_000918_1.1	1.37505	-0.123453	-0.470163	0.639413	0.836983	-0.133104	-0.533292	0.595189	0.839551	-0.128278	-0.69001	0.492021	0.839542	-0.0027743	-0.098539	0.921731	0.963257	0.0359325	0.206148	0.837156	0.966024	-0.00965118	-0.0273817	0.978218	0.991362	-0.00685365	-1.15446	0.251467	0.474671
NVEC200_000919_1.1	2.44281	-0.0268148	-0.149278	0.881679	0.951804	0.216226	1.22246	0.22483	0.557224	0.0947056	0.745522	0.457962	0.819771	0.0264565	1.32725	0.187893	0.402713	-0.12665	-1.01378	0.313493	0.750931	0.243041	0.971724	0.333877	0.604469	-0.00452895	-1.08717	0.279957	0.50875
NVEC200_000920_1.1	3.46912	0.239025	1.76465	0.0811251	0.303066	0.0283035	0.215881	0.829585	0.945753	0.133664	1.39481	0.166617	0.618532	0.0102095	0.692704	0.490336	0.702673	-0.0143905	-0.155926	0.876452	0.976126	-0.210722	-1.13714	0.258596	0.528191	-0.000544648	-0.176752	0.860113	0.931158
NVEC200_000921_1.1	5.67344	0.00310754	0.0466856	0.962871	0.985722	-0.103195	-1.5762	0.118602	0.410422	-0.0500438	-1.0631	0.290675	0.723392	0.0262041	3.55259	0.000618269	0.00776405	-0.0761061	-1.64124	0.10435	0.547304	-0.106303	-1.14827	0.253999	0.523589	-0.000328106	-0.209391	0.834632	0.918865
NVEC200_000922_1.1	5.40916	0.360284	3.14962	0.00230626	0.0332783	-0.123406	-1.10692	0.27168	0.609829	0.118439	1.46379	0.147208	0.597681	-0.0144818	-1.15627	0.251044	0.480813	-0.00755119	-0.0965183	0.923353	0.986161	-0.48369	-3.06888	0.0029412	0.0261643	-0.0100291	-3.78323	0.000299149	0.00446328
NVEC200_000923_1.1	4.91329	-0.597117	-5.83103	9.13608e-08	1.23427e-05	-0.214333	-2.14158	0.0350175	0.214609	-0.405725	-5.60169	2.43565e-07	0.000299438	0.0592762	5.23977	1.10594e-06	5.31111e-05	-0.018972	-0.267103	0.790021	0.949415	0.382783	2.70522	0.00820926	0.0557073	0.000151316	0.0624262	0.950366	0.977438
NVEC200_000924_1.1	3.49925	-0.105388	-0.765822	0.445851	0.716602	0.176202	1.34429	0.182342	0.503078	0.0354074	0.363439	0.717157	0.923632	0.00274216	0.186359	0.852597	0.933306	0.159533	1.75128	0.0834152	0.509692	0.28159	1.52109	0.131857	0.360529	-0.0065095	-2.11393	0.037378	0.144533
NVEC200_000925_1.1	4.47076	0.210643	1.92754	0.0571684	0.25101	-0.00156094	-0.0149094	0.988139	0.996373	0.104541	1.35163	0.17999	0.629914	-0.00372952	-0.317662	0.751501	0.875256	0.119159	1.62729	0.107286	0.55204	-0.212204	-1.43466	0.154963	0.39407	0.00204287	0.829792	0.408923	0.630699
NVEC200_000926_1.1	5.24828	0.153278	1.38862	0.168716	0.448766	0.267701	2.48175	0.0151202	0.136381	0.21049	2.69608	0.00851471	0.288171	0.0123306	1.01853	0.311426	0.544464	0.0261712	0.344921	0.731039	0.933984	0.114423	0.750284	0.455235	0.711544	-0.00549676	-2.15783	0.0338721	0.135747
NVEC200_000928_1.1	0.390592	0.194296	0.31339	0.754871	0.895921	1.23013	1.83973	0.0698382	0.30966	0.712215	1.61995	0.109518	0.54815	0.0324921	0.456576	0.64932	0.814497	-0.560599	-1.2256	0.224254	0.682052	1.03584	1.09813	0.275725	0.545065	-0.00661161	-0.457632	0.648564	0.809816
NVEC200_000929_1.1	6.18402	-0.127024	-2.00535	0.0480275	0.22774	-0.0960902	-1.5467	0.125558	0.422524	-0.111557	-2.49021	0.0146637	0.324602	-0.00245728	-0.351408	0.72613	0.8626	0.00176246	0.0402849	0.967958	0.996239	0.0309334	0.352148	0.725577	0.877114	0.00211166	1.4162	0.16028	0.360891
NVEC200_000930_1.1	3.59116	0.305883	1.96442	0.0526716	0.23992	-0.464273	-3.11884	0.00246184	0.0490533	-0.0791949	-0.718539	0.474349	0.830601	-0.0649261	-3.86195	0.000215755	0.0034909	0.040473	0.392645	0.695542	0.92362	-0.770156	-3.66241	0.000428305	0.00617301	0.000136818	0.0387468	0.969181	0.985697
NVEC200_000931_1.1	2.90502	0.121768	0.750021	0.455261	0.722378	0.227455	1.40155	0.164601	0.479629	0.174612	1.521	0.131879	0.581087	0.0151373	0.831083	0.408198	0.636043	-0.155225	-1.35662	0.178404	0.641597	0.105688	0.460491	0.646311	0.834374	0.0038442	1.01628	0.312309	0.542077
NVEC200_000933_1.1	5.56253	0.134826	1.99444	0.0492284	0.231771	-0.0600185	-0.905277	0.367814	0.698148	0.0374037	0.782341	0.436134	0.811272	-0.0219535	-2.94068	0.00419305	0.0314326	-0.0475642	-1.02176	0.309724	0.747937	-0.194844	-2.07852	0.0406011	0.170935	-0.00400119	-2.53084	0.013174	0.0723685
NVEC200_000934_1.1	9.6745	0.0586028	0.871573	0.385919	0.671721	0.0173279	0.261233	0.794551	0.932046	0.0379654	0.79845	0.426855	0.809097	-0.0179139	-2.41008	0.0181264	0.0884658	0.108069	2.31412	0.0230965	0.336831	-0.0412749	-0.440041	0.661034	0.84353	0.00294642	1.85551	0.0670216	0.210141
NVEC200_000936_1.1	5.00885	-0.108268	-1.38362	0.170007	0.450221	-0.00358794	-0.0471531	0.962499	0.988274	-0.0559278	-1.0104	0.315102	0.742262	0.0310158	3.61545	0.000501338	0.00659202	0.0397707	0.738274	0.462331	0.837715	0.10468	0.973178	0.333158	0.603708	0.00551906	3.03897	0.00313305	0.0263099
NVEC200_000937_1.1	5.31257	-0.137192	-1.75949	0.0820038	0.305055	0.113915	1.48884	0.140137	0.444822	-0.0116386	-0.211054	0.833338	0.965761	-0.00109815	-0.127388	0.898927	0.95526	-0.0288364	-0.535674	0.593548	0.892281	0.251108	2.3211	0.0226154	0.11396	0.00236373	1.29397	0.199094	0.410957
NVEC200_000938_1.1	3.77442	-0.147976	-1.18842	0.237896	0.533606	0.0815621	0.679432	0.498664	0.78785	-0.0332069	-0.376904	0.707161	0.921113	0.0048759	0.360096	0.719647	0.859799	0.0675806	0.802974	0.424174	0.821357	0.229538	1.35304	0.179542	0.42835	0.00193886	0.680481	0.498004	0.703973
NVEC200_000939_1.1	5.27514	0.030167	0.328933	0.742995	0.89142	0.0140678	0.159976	0.87327	0.961403	0.0221174	0.340754	0.734109	0.928609	-0.039303	-3.97302	0.000145784	0.00252938	0.197605	3.22812	0.00175685	0.110259	-0.0160991	-0.129579	0.897198	0.960201	-0.00127283	-0.608748	0.544275	0.738436
NVEC200_000940_1.1	5.87504	-0.120251	-1.97111	0.0518834	0.238225	0.155819	2.60785	0.0107186	0.113992	0.0177841	0.41217	0.681227	0.912608	0.0473083	7.03109	4.35997e-10	6.53677e-08	0.0191846	0.452951	0.65171	0.911007	0.276069	3.26786	0.00155129	0.0166856	-0.00289797	-2.03057	0.0453465	0.164209
NVEC200_000942_1.1	3.22584	0.584633	4.21352	6.11086e-05	0.00225606	-0.0154647	-0.114394	0.909189	0.972989	0.284584	2.89961	0.00472697	0.243152	-0.0354299	-2.34643	0.0212221	0.0980157	-0.0734614	-0.783059	0.435715	0.825247	-0.600097	-3.13995	0.00230716	0.0219824	-0.00674407	-2.14941	0.0343727	0.137201
NVEC200_000943_1.1	5.93253	0.264122	3.7605	0.000306383	0.00776633	-0.208152	-3.02607	0.00325639	0.0579365	0.0279848	0.563357	0.574638	0.875507	-0.0210961	-2.72983	0.00766612	0.0482083	-0.00914849	-0.189314	0.850287	0.969346	-0.472275	-4.85596	5.22493e-06	0.000178431	0.0065314	3.98242	0.000140991	0.00248686
NVEC200_000944_1.1	8.27399	0.0153342	0.244287	0.807583	0.921431	-0.00146231	-0.0234945	0.98131	0.99343	0.00693592	0.156259	0.876191	0.97598	-0.01979	-2.83626	0.00567459	0.0389957	-0.113484	-2.58652	0.0113533	0.256265	-0.0167965	-0.19083	0.849103	0.93908	0.00808274	5.41854	5.26677e-07	3.128e-05
NVEC200_000945_1.1	8.24825	0.154642	2.91405	0.00453251	0.0532721	-0.141076	-2.69121	0.00853372	0.101214	0.00678273	0.180741	0.85699	0.970845	-0.0123911	-2.10932	0.037785	0.145153	0.0319983	0.866327	0.388689	0.800931	-0.295718	-3.98924	0.000137611	0.00252883	0.000871393	0.693957	0.489555	0.69799
NVEC200_000948_1.1	3.46787	0.340973	3.07858	0.00278088	0.0371207	-0.276102	-2.5795	0.0115696	0.118072	0.0324353	0.413913	0.679955	0.911798	-0.0251519	-2.09149	0.0393943	0.149203	-0.051588	-0.690419	0.491765	0.851199	-0.617076	-4.07907	9.97244e-05	0.00195536	-0.00613705	-2.42563	0.0173438	0.0873873
NVEC200_000950_1.1	4.59823	-0.0438741	-0.618717	0.537716	0.775536	-0.0848748	-1.21481	0.227718	0.559948	-0.0643744	-1.2837	0.202647	0.649423	0.00992709	1.25773	0.21185	0.432447	-0.0941438	-1.90644	0.059888	0.461114	-0.0410008	-0.415009	0.679155	0.852602	-0.00128124	-0.766054	0.445714	0.662428
NVEC200_000951_1.1	7.82073	0.0362317	0.77626	0.439697	0.712204	0.0818738	1.77766	0.0789466	0.332615	0.0590527	1.7891	0.0770718	0.498396	-0.00366981	-0.710609	0.479224	0.694025	0.0419292	1.29202	0.199764	0.656797	0.0456421	0.700802	0.485293	0.731686	-0.00175109	-1.5878	0.115952	0.296304
NVEC200_000952_1.1	11.5236	0.0879183	1.72185	0.088643	0.318735	0.0435873	0.864058	0.389928	0.71389	0.0657528	1.82102	0.0720352	0.48606	-0.00988502	-1.7487	0.0838628	0.242135	0.0421749	1.1868	0.238529	0.697172	-0.0443311	-0.621454	0.535923	0.764698	0.00160872	1.33232	0.186229	0.394834
NVEC200_000953_1.1	5.41899	0.0691998	1.0873	0.2799	0.57814	-0.11646	-1.86934	0.0649332	0.299214	-0.0236301	-0.524963	0.600942	0.883704	-0.0331599	-4.71858	8.97868e-06	0.000284495	-0.0284776	-0.651803	0.516243	0.861823	-0.18566	-2.10774	0.0379248	0.162682	-0.00442147	-2.96698	0.00388088	0.0306827
NVEC200_000954_1.1	2.21152	-0.00825366	-0.0442118	0.964837	0.98642	-0.0210259	-0.116876	0.907227	0.972653	-0.0146398	-0.110826	0.912009	0.983062	-0.00442314	-0.21762	0.828234	0.919644	0.0393836	0.312678	0.755272	0.939233	-0.0127722	-0.0502395	0.960046	0.984799	0.00600696	1.41913	0.159426	0.359565
NVEC200_000955_1.1	2.33675	0.39693	2.44081	0.0166776	0.120822	-0.229559	-1.51507	0.133373	0.435039	0.0836852	0.725924	0.46983	0.827164	-0.0183467	-1.08637	0.280308	0.511368	0.219721	2.09671	0.0389167	0.404931	-0.626489	-2.93225	0.0042979	0.0347392	-0.00391773	-1.10731	0.271205	0.49865
NVEC200_000956_1.1	3.68207	-0.341855	-2.7547	0.00715067	0.0712979	0.0720322	0.59819	0.551264	0.812471	-0.134912	-1.53673	0.127981	0.576969	0.0537066	3.94057	0.000163548	0.00279647	-0.00107468	-0.0125761	0.989995	0.999586	0.413888	2.43159	0.0170796	0.093865	-0.00643487	-2.2264	0.0285655	0.121098
NVEC200_000957_1.1	5.39821	-0.196146	-2.63065	0.0100754	0.089066	-0.0575056	-0.792215	0.430386	0.74302	-0.126826	-2.40464	0.0183047	0.34357	0.0442276	5.40202	5.64327e-07	3.01793e-05	0.0590373	1.14567	0.255068	0.709379	0.138641	1.35106	0.180173	0.42894	0.00621882	3.57396	0.000575892	0.00744482
NVEC200_000958_1.1	4.61846	-0.14943	-1.06263	0.291172	0.588085	-0.0653659	-0.489862	0.625584	0.855593	-0.107398	-1.07859	0.284037	0.718657	-0.000374742	-0.0249766	0.980136	0.991434	0.19978	2.14482	0.0350273	0.390711	0.0840638	0.446153	0.656702	0.840447	-0.00505606	-1.58862	0.116124	0.296497
NVEC200_000959_1.1	7.70756	0.292441	5.20581	1.27169e-06	0.000112476	-0.189454	-3.40579	0.000999603	0.0272486	0.0514936	1.29628	0.198302	0.646151	0.00948099	1.52003	0.132122	0.323512	-0.106321	-2.70774	0.00815197	0.223208	-0.481895	-6.12595	2.53282e-08	1.94616e-06	-0.00540251	-4.05845	0.000107414	0.00200387
NVEC200_000961_1.1	4.03202	-0.118495	-1.1613	0.248691	0.545868	0.0513496	0.514333	0.608321	0.846626	-0.0335726	-0.465201	0.642947	0.897704	0.0292513	2.5929	0.0111602	0.0634258	-0.0582348	-0.822397	0.413095	0.814922	0.169844	1.20324	0.232142	0.49857	5.25034e-06	0.00220747	0.998244	0.99918
NVEC200_000962_1.1	3.40048	-0.129149	-0.324088	0.746808	0.893013	-0.255791	-0.695226	0.489144	0.781995	-0.19247	-0.68086	0.498137	0.842263	-0.043969	-1.06886	0.288692	0.521938	0.387965	1.5405	0.127809	0.577805	-0.126642	-0.244314	0.80768	0.916857	0.00215237	0.247627	0.805126	0.903887
NVEC200_000963_1.1	4.58146	0.258566	2.67405	0.00894735	0.0832063	-0.189008	-1.96605	0.0524756	0.268677	0.0347789	0.508652	0.612281	0.887454	-0.0298726	-2.75474	0.00714985	0.0458292	-0.204368	-3.02749	0.00324258	0.148194	-0.447575	-3.29208	0.0014373	0.0156928	0.0074628	3.26628	0.00155901	0.015749
NVEC200_000964_1.1	3.05143	0.0134714	0.101937	0.919041	0.96785	0.156282	1.21499	0.227652	0.559948	0.0848766	0.907954	0.366406	0.77408	0.0158096	1.09044	0.278526	0.50996	0.0172225	0.18997	0.849774	0.969346	0.14281	0.785372	0.434365	0.697048	-0.000459722	-0.151818	0.879681	0.942967
NVEC200_000965_1.1	4.18138	-0.69893	-1.88389	0.0636062	0.26427	-0.144865	-0.414164	0.679981	0.881157	-0.421898	-1.60541	0.112768	0.555295	-0.00456322	-0.116546	0.907543	0.958538	0.167526	0.693877	0.489985	0.851057	0.554065	1.1223	0.265452	0.534897	-0.000293023	-0.035019	0.972161	0.987585
NVEC200_000966_1.1	6.8748	0.529503	8.03698	4.11632e-12	2.20026e-09	-0.41072	-6.33773	9.94398e-09	4.21556e-06	0.0593919	1.2747	0.205804	0.651334	-0.045367	-6.24385	1.50707e-08	1.39308e-06	-0.0223026	-0.490022	0.62535	0.903916	-0.940223	-10.2604	1.16671e-16	7.96866e-14	-0.0010607	-0.686273	0.494362	0.700921
NVEC200_000968_1.1	1.31001	-0.464796	-1.69011	0.0945805	0.331463	0.144605	0.564629	0.573776	0.826093	-0.160095	-0.821181	0.413783	0.803625	0.0423075	1.47516	0.143772	0.342184	0.226675	1.26115	0.210619	0.66734	0.609401	1.68752	0.0950783	0.29441	0.00952071	1.60225	0.112718	0.291002
NVEC200_000969_1.1	6.68348	0.121126	2.51031	0.0139089	0.108776	-0.0626691	-1.31127	0.19321	0.51931	0.0292287	0.856627	0.394	0.790241	-0.0185353	-3.45159	0.00086166	0.0099748	-0.129379	-3.84158	0.000231461	0.0375778	-0.183796	-2.71944	0.00789126	0.0539873	0.00216349	1.89266	0.0617219	0.199413
NVEC200_000971_1.1	4.19238	0.132647	1.38456	0.16972	0.449809	-0.137834	-1.45345	0.14969	0.460065	-0.00259347	-0.0382814	0.969551	0.994538	-0.0232691	-2.17101	0.0326479	0.131771	-0.135873	-2.03992	0.0443856	0.425358	-0.270481	-2.01692	0.0467812	0.187288	-0.000124218	-0.0549332	0.956317	0.979469
NVEC200_000972_1.1	6.12461	0.0689649	1.19986	0.233447	0.529031	0.0113115	0.200331	0.841688	0.950444	0.0401382	0.987427	0.326167	0.749101	0.00285101	0.449165	0.654427	0.817942	-0.0202407	-0.508539	0.61236	0.900918	-0.0576534	-0.722121	0.472153	0.723782	0.00189339	1.40464	0.163681	0.366071
NVEC200_000973_1.1	2.70459	-0.296214	-1.87442	0.0642214	0.265756	0.0939983	0.623297	0.534717	0.805512	-0.101108	-0.903828	0.368578	0.775243	-0.00363129	-0.213557	0.831391	0.921736	0.10093	0.962742	0.33834	0.76688	0.390212	1.83183	0.0703926	0.246134	0.000260652	0.072943	0.942019	0.97293
NVEC200_000974_1.1	0.918404	-0.482608	-1.33201	0.18633	0.473489	-0.0105011	-0.0305166	0.975725	0.991696	-0.246555	-0.961085	0.339168	0.758336	0.0257381	0.665083	0.507754	0.716849	0.103461	0.431202	0.667386	0.916134	0.472107	0.971558	0.333959	0.604489	0.00833433	1.02415	0.308597	0.538141
NVEC200_000975_1.1	7.20158	0.101806	0.842546	0.402236	0.682966	0.206233	1.72903	0.0880332	0.351275	0.15402	1.80249	0.0755985	0.494168	-0.00167503	-0.125263	0.90066	0.955703	-0.00539941	-0.0642323	0.948961	0.991124	0.104427	0.619126	0.537762	0.765874	0.00757581	2.65916	0.00962328	0.0578526
NVEC200_000976_1.1	4.63541	-0.253426	-2.93062	0.00431837	0.0516441	0.129653	1.54698	0.125491	0.42245	-0.0618861	-1.01159	0.314533	0.742262	0.0134696	1.42654	0.157285	0.360629	0.0458127	0.777967	0.438695	0.826182	0.383079	3.23371	0.00172647	0.018018	0.00158247	0.793234	0.429795	0.648826
NVEC200_000977_1.1	3.67116	0.0611356	0.45327	0.651481	0.844151	0.0373541	0.290223	0.772335	0.923647	0.0492448	0.515776	0.607316	0.885632	0.0151284	1.04558	0.298645	0.531264	0.0949653	1.05249	0.295484	0.73712	-0.0237815	-0.130811	0.896227	0.960109	-0.000483461	-0.159503	0.873641	0.939964
NVEC200_000978_1.1	6.65165	0.119434	1.56382	0.121483	0.377532	-0.0643582	-0.858929	0.392735	0.716028	0.0275379	0.50983	0.611459	0.887403	-0.0136394	-1.62122	0.108582	0.28663	0.0431422	0.818433	0.415342	0.816733	-0.183792	-1.73479	0.086312	0.277008	-7.97009e-05	-0.0444917	0.964614	0.983575
NVEC200_000979_1.1	3.87267	-0.0695914	-0.506519	0.613772	0.823408	-0.283481	-2.13495	0.0355712	0.216921	-0.176536	-1.81608	0.0727954	0.48926	-0.0279806	-1.8621	0.0659576	0.207759	0.0199433	0.214908	0.830341	0.964312	-0.21389	-1.13975	0.257512	0.527115	0.00661567	2.07783	0.0406668	0.152659
NVEC200_000981_1.1	5.29214	0.0146131	0.198132	0.843403	0.936975	-0.114515	-1.58931	0.115612	0.405517	-0.049951	-0.957534	0.340946	0.758777	0.0144837	1.78446	0.0778284	0.230393	-0.00451527	-0.0887101	0.929516	0.988171	-0.129128	-1.26758	0.208325	0.467703	0.00553215	3.2126	0.00184384	0.0178938
NVEC200_000982_1.1	6.46365	0.117464	2.27581	0.0253089	0.157431	-0.113842	-2.25127	0.0268833	0.183715	0.0018111	0.0496131	0.960544	0.99351	-0.00228507	-0.402239	0.688493	0.841097	0.0364584	1.02378	0.30877	0.747376	-0.231306	-3.23513	0.00171884	0.0179689	-0.00275856	-2.2806	0.0250111	0.110966
NVEC200_000983_1.1	7.66977	-0.179492	-2.30321	0.0238044	0.151595	-0.0423048	-0.54933	0.584275	0.8334	-0.110899	-2.01233	0.0474744	0.435885	-0.0161829	-1.87241	0.064721	0.205647	-0.0195945	-0.361191	0.718887	0.930805	0.137188	1.25972	0.21135	0.472093	0.00806424	4.36157	3.73333e-05	0.000901721
NVEC200_000984_1.1	2.79938	-0.330927	-2.09517	0.0390568	0.202601	0.09459	0.634732	0.527266	0.800668	-0.118169	-1.05625	0.293772	0.726548	0.0229885	1.37412	0.172926	0.382642	0.159174	1.53192	0.129163	0.578902	0.425517	2.02292	0.046146	0.185702	0.00317774	0.907416	0.366689	0.59434
NVEC200_000985_1.1	5.80319	-0.0170033	-0.198671	0.842982	0.936952	-0.093248	-1.09915	0.274727	0.613644	-0.0551257	-0.910865	0.364878	0.77408	-0.0108669	-1.13629	0.258951	0.489195	-0.145957	-2.44169	0.0166395	0.297312	-0.0762447	-0.635523	0.526752	0.759326	-0.00274002	-1.34734	0.181362	0.388491
NVEC200_000986_1.1	2.07286	-0.0858813	-0.43003	0.668235	0.85282	-0.168954	-0.859634	0.392349	0.715764	-0.127418	-0.902172	0.369452	0.776024	-0.0415102	-1.85703	0.0666849	0.208979	-0.128576	-0.938489	0.350586	0.777448	-0.0830726	-0.298914	0.765717	0.897387	-0.00299448	-0.635066	0.527049	0.726062
NVEC200_000987_1.1	1.94093	0.0180361	0.0661821	0.947392	0.979808	-0.545636	-1.96701	0.0525269	0.268733	-0.2638	-1.36874	0.174778	0.627497	-0.00978412	-0.311979	0.75584	0.877087	-0.393327	-2.02339	0.0462546	0.432572	-0.563672	-1.43708	0.154459	0.393395	-0.00159179	-0.236749	0.813435	0.907722
NVEC200_000988_1.1	4.05007	0.122912	1.43636	0.154478	0.428334	-0.1923	-2.31947	0.0227074	0.167121	-0.0346942	-0.573092	0.568058	0.87207	0.00700311	0.749106	0.45581	0.676616	-0.0101458	-0.173709	0.862497	0.971644	-0.315213	-2.68986	0.0085657	0.0573566	-0.00303083	-1.53377	0.128709	0.315523
NVEC200_000989_1.1	3.71517	0.30425	2.21545	0.0293355	0.172246	0.0955826	0.716764	0.475436	0.774942	0.199916	2.05781	0.0425951	0.422651	0.015036	1.00498	0.317686	0.550476	0.00176112	0.0187846	0.985056	0.998636	-0.208667	-1.10697	0.271351	0.540767	0.000662663	0.212449	0.832253	0.917388
NVEC200_000990_1.1	4.59022	-0.272884	-2.35288	0.0208796	0.139251	0.47692	4.25763	5.19341e-05	0.00364441	0.102018	1.24323	0.217118	0.66162	0.0282238	2.24844	0.02707	0.115555	0.10425	1.33104	0.186645	0.650181	0.749804	4.73628	8.37731e-06	0.000264079	-0.00374405	-1.42004	0.159164	0.359171
NVEC200_000991_1.1	2.3461	-0.0807484	-0.394446	0.694215	0.866818	-0.156578	-0.81434	0.417669	0.734344	-0.118663	-0.818141	0.415508	0.803783	-0.00188694	-0.0871513	0.930751	0.968403	0.140088	1.04803	0.297521	0.738949	-0.0758297	-0.279495	0.780527	0.905435	0.0059574	1.3146	0.192092	0.401893
NVEC200_000992_1.1	5.57425	-0.0238765	-0.396255	0.692885	0.86586	0.0396299	0.672007	0.503357	0.789813	0.0078767	0.184826	0.853795	0.969748	-0.00308768	-0.465012	0.643083	0.810296	-0.00138136	-0.033297	0.973514	0.997253	0.0635064	0.761655	0.448322	0.706443	-0.00136775	-0.971356	0.334059	0.562993
NVEC200_000993_1.1	5.29893	-0.0374559	-0.522768	0.602462	0.816882	0.0905803	1.29367	0.199195	0.526348	0.0265622	0.524146	0.601507	0.883704	0.00656313	0.832324	0.407501	0.635386	0.0178826	0.362737	0.717679	0.930516	0.128036	1.29339	0.199293	0.454566	-0.00229892	-1.3771	0.172007	0.376847
NVEC200_000994_1.1	5.20531	-0.258227	-3.21164	0.00184935	0.0290741	0.0201223	0.253764	0.800276	0.934691	-0.119052	-2.09381	0.0391817	0.415754	0.0260379	2.91008	0.00458519	0.033494	-0.0795107	-1.4154	0.160515	0.623642	0.278349	2.48239	0.014967	0.0851874	0.00805658	4.2359	5.62738e-05	0.00119901
NVEC200_000995_1.1	2.07202	-0.26904	-1.37447	0.17282	0.454609	0.0973649	0.508691	0.612254	0.848596	-0.0858375	-0.620013	0.536867	0.858624	-0.0285115	-1.31441	0.192158	0.407519	-0.0936465	-0.703572	0.483574	0.847466	0.366405	1.35398	0.179243	0.427886	0.0134075	2.96277	0.00392934	0.0309068
NVEC200_000996_1.1	3.88194	-0.150543	-1.39156	0.167597	0.447308	0.248812	2.37747	0.0196186	0.155207	0.0491342	0.641948	0.522592	0.852728	-0.0220497	-1.87068	0.0647452	0.205647	0.0366938	0.505593	0.614419	0.901044	0.399355	2.69988	0.00833145	0.0562237	-0.0008842	-0.358783	0.720625	0.855218
NVEC200_000997_1.1	4.78539	-0.0974224	-1.27386	0.206097	0.497837	0.196853	2.66173	0.00925538	0.105162	0.0497155	0.918812	0.360729	0.772831	0.0260002	3.12497	0.00241531	0.0212859	0.0849969	1.63258	0.106164	0.550463	0.294276	2.81528	0.00602487	0.044073	-0.00364548	-2.07904	0.0405525	0.152462
NVEC200_000998_1.1	4.71009	0.0838751	0.865676	0.389044	0.673479	-0.34058	-3.63886	0.000463416	0.0161727	-0.128352	-1.87232	0.0645148	0.470988	-0.0353953	-3.34992	0.00119607	0.0127635	0.0462627	0.707981	0.480846	0.846513	-0.424455	-3.2088	0.00186576	0.0191947	0.00116122	0.518178	0.605647	0.781222
NVEC200_000999_1.1	3.21595	0.675571	4.97132	3.29618e-06	0.000234239	-0.312267	-2.39825	0.0186068	0.151592	0.181652	1.88868	0.0622604	0.468153	0.00465203	0.321835	0.748348	0.874127	-0.0012373	-0.0135936	0.989185	0.999586	-0.987839	-5.36997	6.45004e-07	3.03819e-05	-0.00112388	-0.371908	0.710864	0.848482
NVEC200_001000_1.1	6.60818	-0.0022691	-0.0428553	0.965915	0.986866	0.0829186	1.58807	0.115892	0.406033	0.0403247	1.07695	0.284475	0.719	-0.0131373	-2.23897	0.0277037	0.117243	-0.0340015	-0.925001	0.357519	0.781393	0.0851877	1.15378	0.251744	0.52121	0.000515441	0.412703	0.680838	0.829556
NVEC200_001001_1.1	4.44983	-0.0473575	-0.391637	0.696286	0.867816	-0.00394174	-0.0336621	0.973224	0.991436	-0.0256496	-0.299824	0.765028	0.94139	0.0183128	1.38664	0.169098	0.377553	0.0326941	0.395775	0.693241	0.923453	0.0434158	0.262316	0.793699	0.91132	-0.000892808	-0.320123	0.749644	0.873152
NVEC200_001002_1.1	5.90217	0.0339579	0.524023	0.601592	0.816333	-0.0717592	-1.13356	0.260086	0.596595	-0.0189006	-0.412365	0.681084	0.912608	-0.00778674	-1.09256	0.277599	0.509374	0.016522	0.371023	0.711521	0.929173	-0.105717	-1.1812	0.240736	0.508437	-0.00977435	-6.44286	6.2277e-09	1.00741e-06
NVEC200_001003_1.1	4.89054	0.311247	3.29268	0.00143459	0.0241931	-0.357416	-3.85062	0.000224286	0.0098127	-0.0230845	-0.345308	0.730695	0.926959	-0.0422029	-4.03249	0.000117911	0.00218909	-0.0931189	-1.43428	0.15507	0.616169	-0.668664	-5.09476	2.00173e-06	7.93846e-05	-0.00269838	-1.21937	0.225993	0.443757
NVEC200_001004_1.1	4.29369	-0.109529	-1.2743	0.205944	0.497744	0.253179	2.9675	0.00387491	0.0644555	0.0718254	1.18175	0.24052	0.682201	0.0338699	3.52226	0.00068351	0.00841148	-0.140575	-2.32395	0.0224547	0.3326	0.362708	3.0062	0.0034552	0.0295809	-0.000780808	-0.386265	0.700242	0.84164
NVEC200_001006_1.1	4.69876	-0.0701307	-0.830765	0.408376	0.687935	0.0908655	1.09334	0.277255	0.616713	0.0103674	0.173661	0.862535	0.97209	0.000427053	0.0455611	0.963764	0.984243	-0.0866	-1.47906	0.142729	0.597241	0.160996	1.36998	0.174212	0.42032	0.00236551	1.1958	0.235017	0.455193
NVEC200_001007_1.1	4.41683	0.0810316	0.60275	0.548343	0.783146	-0.236403	-1.80209	0.075217	0.324042	-0.0776855	-0.816972	0.416318	0.804551	0.00182964	0.12354	0.901982	0.955946	-0.0465708	-0.503734	0.615803	0.901044	-0.317434	-1.71159	0.0907634	0.285513	-0.000464271	-0.147888	0.882795	0.944414
NVEC200_001008_1.1	3.74728	-0.0515171	-0.463398	0.644234	0.839184	-0.0828181	-0.774211	0.440901	0.751273	-0.0671676	-0.853797	0.395558	0.791697	0.00804721	0.666844	0.506633	0.71597	0.0458149	0.609163	0.544001	0.876218	-0.031301	-0.207075	0.836435	0.931865	0.000955213	0.375605	0.708123	0.846807
NVEC200_001009_1.1	5.61934	0.148642	2.30372	0.0236173	0.15091	-0.000774651	-0.0123291	0.990191	0.996735	0.0739338	1.61992	0.108863	0.546859	-0.00747489	-1.05831	0.292839	0.525725	0.0395312	0.895778	0.372839	0.791928	-0.149417	-1.68218	0.0961126	0.296588	-0.00299947	-2.00587	0.0479706	0.170448
NVEC200_001010_1.1	3.50741	-0.0570785	-0.470394	0.639248	0.83692	-0.375081	-3.12779	0.00239462	0.0482992	-0.21608	-2.51819	0.0136224	0.322145	-0.00209364	-0.154232	0.877783	0.944383	-0.143376	-1.69285	0.0940559	0.52481	-0.318003	-1.87525	0.0641066	0.231162	0.00221452	0.765518	0.446031	0.66266
NVEC200_001011_1.1	1.09737	-0.267683	-1.00311	0.318583	0.611616	-0.106284	-0.404217	0.687044	0.8851	-0.186983	-0.99083	0.324511	0.747563	-0.00318959	-0.107183	0.91489	0.96104	-0.0455459	-0.246637	0.805769	0.956836	0.161399	0.434093	0.665294	0.846117	0.00306029	0.48538	0.628625	0.796733
NVEC200_001012_1.1	4.49469	-0.213438	-2.11626	0.0371743	0.196907	0.163239	1.68422	0.0957161	0.366128	-0.0250994	-0.351666	0.725938	0.925613	0.0382078	3.50097	0.000733128	0.00887987	0.120025	1.75752	0.0823396	0.50741	0.376677	2.75045	0.00723647	0.0506347	-0.0046574	-2.02314	0.0461231	0.166092
NVEC200_001013_1.1	4.80531	0.466724	5.25165	1.05313e-06	9.51994e-05	-0.309364	-3.55912	0.000605022	0.0195193	0.0786799	1.25172	0.21402	0.659624	-0.0136195	-1.39785	0.165704	0.372834	-0.0809433	-1.32799	0.18765	0.650212	-0.776087	-6.3151	1.09946e-08	9.43169e-07	-0.0019514	-0.948914	0.345288	0.573257
NVEC200_001015_1.1	4.88136	-0.0154775	-0.178337	0.858872	0.943045	0.0644779	0.759783	0.449434	0.756453	0.0245002	0.399131	0.690773	0.916171	-0.0164401	-1.7184	0.0892736	0.251782	-0.0107522	-0.180546	0.857143	0.97115	0.0799555	0.666386	0.506924	0.745092	0.00738692	3.65862	0.000433535	0.00598863
NVEC200_001016_1.1	2.06772	0.130204	0.693716	0.489705	0.747973	0.226074	1.23421	0.220443	0.55176	0.178139	1.34184	0.183132	0.631031	-0.0390099	-1.88445	0.0628367	0.202494	0.00036383	0.00286539	0.99772	0.999916	0.0958697	0.370202	0.71213	0.869493	0.00943643	2.21496	0.0293704	0.123362
NVEC200_001018_1.1	4.01994	-0.218443	-2.37313	0.0198365	0.134735	0.208914	2.3038	0.0236125	0.171062	-0.00476457	-0.0731936	0.94182	0.989217	0.0303944	2.97281	0.00381474	0.0294218	-0.0710213	-1.10557	0.271955	0.721827	0.427357	3.33276	0.00126336	0.0141584	0.00449357	2.09149	0.0393941	0.149203
NVEC200_001020_1.1	6.11018	-0.133382	-1.57687	0.118502	0.373747	0.0787869	0.942815	0.34842	0.681503	-0.0272975	-0.456356	0.649285	0.90043	0.0177398	1.88605	0.062668	0.202162	-0.092592	-1.56809	0.120536	0.568438	0.212169	1.79544	0.0760995	0.257732	7.18833e-05	0.0359342	0.971418	0.986993
NVEC200_001021_1.1	4.49347	0.205521	2.32172	0.0225799	0.146603	-0.0922074	-1.0787	0.2837	0.621933	0.0566569	0.9046	0.368171	0.774918	0.0134339	1.3979	0.165689	0.372834	0.0296306	0.49216	0.623843	0.903894	-0.297729	-2.46447	0.0156839	0.088327	-0.00201506	-0.995298	0.322346	0.552327
NVEC200_001022_1.1	5.81986	-0.0406278	-0.683628	0.496024	0.750907	0.0986537	1.70153	0.0924089	0.360521	0.029013	0.690195	0.491905	0.839516	0.0138069	2.11688	0.03712	0.143501	0.0603985	1.47888	0.142776	0.597241	0.139281	1.69919	0.0928492	0.289939	-0.00396076	-2.86074	0.00528949	0.0379842
NVEC200_001024_1.1	4.05985	0.0623519	0.561899	0.575627	0.799833	0.123574	1.15334	0.251923	0.586709	0.092963	1.18404	0.239615	0.68161	-0.013327	-1.10458	0.27238	0.502798	0.0741813	0.990813	0.324519	0.758487	0.0612223	0.404308	0.686977	0.857605	-0.00364018	-1.43766	0.15411	0.352095
NVEC200_001025_1.1	5.20155	-0.077041	-0.985015	0.327343	0.619799	0.149039	1.97657	0.0512522	0.265057	0.035999	0.650482	0.517092	0.851296	0.00759269	0.895553	0.372958	0.603944	0.131436	2.4861	0.0148227	0.28518	0.22608	2.12164	0.0367062	0.159177	-0.00481121	-2.68165	0.00876198	0.0545785
NVEC200_001026_1.1	4.2704	0.16063	1.72857	0.0874269	0.316179	0.0591433	0.661195	0.510231	0.794253	0.109886	1.67111	0.0982874	0.530817	-0.00650483	-0.647128	0.519249	0.72558	0.0692541	1.10718	0.271261	0.721827	-0.101486	-0.802895	0.424219	0.68879	0.00180685	0.857952	0.393272	0.617108
NVEC200_001027_1.1	7.24819	-0.00148617	-0.0309007	0.975419	0.990822	-0.0305582	-0.643708	0.521455	0.79865	-0.0160222	-0.471086	0.638756	0.896687	0.00341542	0.64109	0.523146	0.727797	-0.0157919	-0.47174	0.638291	0.90792	-0.0290721	-0.433071	0.666033	0.846458	0.00211669	1.86127	0.0660766	0.207974
NVEC200_001028_1.1	8.3609	0.115164	2.13927	0.0352095	0.189937	-0.0176062	-0.330646	0.741705	0.910061	0.0487789	1.28136	0.203467	0.650057	-0.0127338	-2.13402	0.0356496	0.139712	-0.00465743	-0.124128	0.9015	0.981234	-0.13277	-1.76323	0.0813655	0.269045	-0.000822939	-0.64533	0.520408	0.721866
NVEC200_001029_1.1	2.79973	0.376191	2.47738	0.0151644	0.114586	-0.157357	-1.08457	0.281104	0.620448	0.109417	1.01797	0.311511	0.739984	-0.0463567	-2.84274	0.00557012	0.038493	0.0254766	0.253651	0.800362	0.953178	-0.533547	-2.6033	0.0108512	0.0677522	-0.00858969	-2.52655	0.0133246	0.0729675
NVEC200_001030_1.1	2.50702	-0.0079004	-0.044644	0.964493	0.986318	-0.156908	-0.930534	0.354664	0.687906	-0.0824042	-0.657765	0.512423	0.849706	-0.0169559	-0.888793	0.376561	0.607466	0.0762314	0.649852	0.517497	0.862541	-0.149008	-0.625664	0.53317	0.76254	-9.17423e-05	-0.0228139	0.981851	0.992916
NVEC200_001031_1.1	6.93557	-0.0351465	-0.653065	0.515433	0.763094	0.0250175	0.471279	0.638619	0.860682	-0.0050645	-0.133071	0.894444	0.979727	-0.0108288	-1.81636	0.072753	0.220923	-0.0204705	-0.547475	0.585451	0.888692	0.0601641	0.80149	0.425028	0.689319	0.000421477	0.331466	0.741088	0.868122
NVEC200_001032_1.1	3.43377	0.13916	1.14201	0.256576	0.55462	0.237944	2.01787	0.0466797	0.251999	0.188552	2.1871	0.031413	0.398606	0.068454	5.15579	1.56088e-06	7.02911e-05	0.0281824	0.334182	0.739045	0.936337	0.0987838	0.592708	0.554911	0.777326	-0.00156535	-0.568776	0.570971	0.756821
NVEC200_001033_1.1	3.63722	0.150306	1.23663	0.219545	0.513329	-0.0236816	-0.202292	0.84016	0.950311	0.0633121	0.736141	0.463622	0.823542	0.00584764	0.443991	0.658149	0.820285	0.0457823	0.556829	0.579071	0.886788	-0.173987	-1.05172	0.295834	0.566156	0.000671054	0.243233	0.808396	0.905221
NVEC200_001034_1.1	2.26213	0.0548776	0.282699	0.778078	0.906718	0.419541	2.15114	0.0342316	0.212011	0.23721	1.72811	0.0875098	0.51709	0.0276844	1.27168	0.206871	0.426579	-0.19233	-1.40135	0.16466	0.62576	0.364664	1.32214	0.189581	0.441249	0.00356197	0.793951	0.42938	0.648581
NVEC200_001035_1.1	1.18845	0.54832	2.37324	0.0198308	0.134735	0.0821825	0.355739	0.722895	0.904862	0.315251	1.92965	0.0569023	0.456928	-0.0484683	-1.87833	0.0636796	0.203981	-0.189011	-1.18442	0.239466	0.697863	-0.466137	-1.42676	0.157221	0.396844	0.0033971	0.63882	0.524615	0.724682
NVEC200_001036_1.1	8.69286	-0.0310164	-0.405824	0.685952	0.862015	-0.259485	-3.42835	0.000960865	0.0266214	-0.145251	-2.68756	0.00874756	0.291182	-0.00707587	-0.834065	0.40672	0.634667	-0.0498181	-0.933643	0.353288	0.778932	-0.228469	-2.13455	0.0358488	0.156272	0.00292462	1.61078	0.111153	0.288052
NVEC200_001037_1.1	6.30436	-0.0397007	-0.380781	0.704418	0.872468	-0.265248	-2.58549	0.011619	0.118346	-0.152474	-2.06791	0.0420193	0.421702	0.00267784	0.232005	0.817152	0.913204	-0.0513484	-0.709516	0.480155	0.846171	-0.225547	-1.55479	0.124111	0.347805	0.00506632	2.056	0.0431835	0.158761
NVEC200_001038_1.1	5.98599	0.0101877	0.144076	0.885773	0.953981	-0.113519	-1.63867	0.104886	0.385262	-0.0516655	-1.03309	0.304419	0.735271	-0.0110238	-1.41402	0.160919	0.365952	0.00129954	0.0266649	0.978788	0.997936	-0.123706	-1.26298	0.209963	0.470438	0.00363742	2.19294	0.0309745	0.127787
NVEC200_001039_1.1	5.19804	-0.13476	-1.68915	0.0947657	0.331645	-0.0322317	-0.41508	0.679103	0.880603	-0.0834961	-1.47954	0.142601	0.59335	0.0283686	3.24041	0.00169071	0.016297	0.0246269	0.448653	0.654795	0.912196	0.102529	0.934	0.352884	0.623954	0.000649747	0.349854	0.727292	0.859803
NVEC200_001040_1.1	4.45915	-0.0681986	-0.745615	0.457906	0.724028	-0.0612224	-0.680201	0.49818	0.787631	-0.0647105	-1.0004	0.319887	0.744969	-0.00212411	-0.208908	0.835008	0.923081	-0.0940315	-1.48214	0.141909	0.596659	0.00697624	0.054814	0.956412	0.984103	0.00719088	3.34443	0.00121723	0.0130488
NVEC200_001043_1.1	1.44885	0.0294311	0.119674	0.905016	0.962314	-0.35686	-1.54965	0.12485	0.421213	-0.163715	-0.93941	0.350116	0.764398	-0.0151833	-0.58634	0.559162	0.753022	0.201477	1.26512	0.209198	0.666616	-0.386292	-1.18909	0.237635	0.505465	-0.003212	-0.587463	0.558411	0.748181
NVEC200_001045_1.1	3.54232	-0.193441	-1.86691	0.0652751	0.268302	-0.0337333	-0.337015	0.736916	0.908155	-0.113587	-1.54939	0.124912	0.572922	0.0466062	4.11431	8.77898e-05	0.00170773	0.0234898	0.329561	0.742523	0.937707	0.159708	1.12896	0.26201	0.531543	0.00288884	1.21099	0.229172	0.447836
NVEC200_001046_1.1	1.48683	-0.0853312	-0.331885	0.740773	0.889589	0.0483776	0.184605	0.853968	0.954773	-0.0184768	-0.101611	0.919298	0.985067	-0.000809097	-0.0274193	0.978188	0.990841	-0.283169	-1.53832	0.127594	0.577805	0.133709	0.360844	0.719089	0.873134	-0.00514612	-0.828087	0.409883	0.631661
NVEC200_001047_1.1	1.28501	-0.0303192	-0.121174	0.903832	0.96172	0.299297	1.18657	0.238621	0.571951	0.134489	0.760111	0.449239	0.814195	-0.0217688	-0.76698	0.445166	0.667453	-0.224612	-1.27579	0.205421	0.661839	0.329616	0.924056	0.358008	0.628047	0.0102559	1.74724	0.084117	0.242518
NVEC200_001048_1.1	5.7915	-0.0423582	-0.670142	0.504539	0.755886	-0.0623775	-1.00899	0.315771	0.651639	-0.0523678	-1.17139	0.244633	0.682907	0.00661255	0.949775	0.344853	0.578946	0.00618557	0.14197	0.887431	0.977681	-0.0200193	-0.229036	0.819377	0.922589	-0.00463579	-3.13004	0.0023782	0.0216255
NVEC200_001049_1.1	2.88941	-0.0940957	-0.68582	0.494647	0.750578	-0.0570303	-0.426038	0.67113	0.876122	-0.075563	-0.778633	0.438304	0.811272	-0.000109761	-0.00724415	0.994237	0.997563	-0.0528305	-0.560957	0.576266	0.885687	0.0370653	0.195855	0.84518	0.936853	0.00233184	0.731698	0.466316	0.679574
NVEC200_001050_1.1	5.30486	0.0166875	0.22165	0.825105	0.928705	-0.0788339	-1.07318	0.286151	0.624013	-0.0310732	-0.583508	0.561058	0.868882	0.0173407	2.09475	0.0390957	0.148438	0.0126039	0.242982	0.80859	0.958011	-0.0955214	-0.919782	0.360225	0.630138	-0.00515448	-2.93414	0.0042742	0.0326785
NVEC200_001051_1.1	5.23244	0.185979	1.76114	0.0818253	0.304836	0.197263	1.93243	0.0566497	0.278915	0.191621	2.56471	0.0120896	0.316775	-0.00606435	-0.52936	0.597941	0.779047	0.116454	1.63024	0.106766	0.551697	0.0112843	0.0782144	0.937842	0.97677	-0.011377	-4.7078	9.68306e-06	0.000308403
NVEC200_001052_1.1	7.34705	-0.0225701	-0.469466	0.639909	0.837186	0.121207	2.55729	0.0122785	0.121323	0.0493185	1.45062	0.150476	0.600549	0.00267405	0.502806	0.616369	0.791646	0.0306819	0.918646	0.360816	0.783851	0.143777	2.14523	0.0347161	0.15303	-0.00497681	-4.38587	3.21896e-05	0.000812605
NVEC200_001053_1.1	6.22492	-0.250722	-3.64768	0.000449846	0.0102796	0.304487	4.52004	1.93525e-05	0.00171165	0.0268827	0.553	0.581679	0.877262	0.0153876	2.03256	0.0451408	0.163032	0.0535234	1.12859	0.26217	0.714993	0.555209	5.82917	9.20975e-08	5.77677e-06	-0.000711788	-0.442102	0.65951	0.815881
NVEC200_001054_1.1	5.49305	0.191872	2.81645	0.0060049	0.0640425	-0.11295	-1.69763	0.0931446	0.361669	0.0394613	0.818943	0.415052	0.803783	-0.000488998	-0.0653512	0.948044	0.976234	-0.00394769	-0.0842892	0.93302	0.989	-0.304822	-3.24054	0.00169002	0.0177639	-0.00144802	-0.913592	0.363452	0.591433
NVEC200_001055_1.1	6.33326	0.0650267	1.0288	0.30642	0.600999	-0.278821	-4.49133	2.15935e-05	0.00184355	-0.106897	-2.39139	0.0189357	0.347191	-0.00739756	-1.0598	0.292165	0.525358	-0.0205423	-0.469761	0.639699	0.908556	-0.343847	-3.91718	0.00017762	0.00312398	0.00398245	2.67511	0.00892134	0.0552539
NVEC200_001056_1.1	5.86769	0.257205	3.92108	0.000175197	0.00515279	-0.208561	-3.26304	0.001575	0.0370231	0.0243219	0.524195	0.601473	0.883704	-0.0352016	-4.90044	4.37733e-06	0.000162583	0.0381382	0.851829	0.396643	0.805295	-0.465767	-5.1546	1.56848e-06	6.44009e-05	0.00293168	1.9254	0.0574398	0.189676
NVEC200_001057_1.1	5.15455	-0.236518	-3.18379	0.0020161	0.0309438	0.240131	3.3235	0.00130113	0.0322159	0.00180616	0.0343702	0.972661	0.9946	0.0272372	3.35073	0.00119299	0.0127536	0.0694583	1.36516	0.175717	0.637695	0.476649	4.66669	1.09928e-05	0.000336184	0.00097094	0.564807	0.573656	0.758417
NVEC200_001058_1.1	4.4591	0.074425	0.784455	0.4349	0.709278	0.0756678	0.831792	0.407799	0.72733	0.0750464	1.11766	0.266783	0.706367	0.0165906	1.62319	0.10816	0.286084	0.131126	2.05269	0.0431011	0.422014	0.00124279	0.00966952	0.992307	0.997058	0.00186975	0.870696	0.386312	0.611316
NVEC200_001061_1.1	5.04196	0.089361	1.15022	0.253197	0.55055	0.0357697	0.472148	0.638001	0.860325	0.0625653	1.13853	0.258017	0.699926	0.012594	1.47733	0.143192	0.341627	0.00803491	0.150413	0.880786	0.976859	-0.0535913	-0.500365	0.618079	0.818202	0.00193586	1.07626	0.28478	0.513431
NVEC200_001062_1.1	8.82206	0.220283	3.64818	0.000449092	0.0102796	0.0333854	0.560333	0.57669	0.828192	0.126834	2.97035	0.00384248	0.222828	-0.0281237	-4.21433	6.09278e-05	0.00129817	0.118687	2.83081	0.00576374	0.194669	-0.186897	-2.21828	0.0291346	0.135521	-0.00151672	-1.06413	0.290207	0.519255
NVEC200_001063_1.1	4.09042	-0.0183702	-0.195586	0.845389	0.938035	0.048	0.527777	0.598995	0.840959	0.0148149	0.222953	0.824093	0.964046	0.0119637	1.16728	0.246282	0.475768	0.0475891	0.74391	0.458931	0.836269	0.0663702	0.516307	0.606947	0.811698	0.000473744	0.21986	0.826494	0.91477
NVEC200_001065_1.1	6.83651	0.0525517	0.61318	0.541468	0.778483	-0.215525	-2.56853	0.012041	0.120683	-0.0814869	-1.34433	0.182578	0.631031	-0.0126644	-1.34425	0.182605	0.395724	0.100465	1.70221	0.0925359	0.522546	-0.268077	-2.2596	0.0265203	0.12774	-0.000423557	-0.210574	0.833746	0.918219
NVEC200_001066_1.1	3.08971	0.162323	1.37175	0.173663	0.455711	0.17362	1.51011	0.134631	0.437409	0.167971	2.00662	0.0478898	0.436763	0.00940924	0.72869	0.468145	0.686253	-0.0201251	-0.249528	0.803539	0.955301	0.0112971	0.0695108	0.944742	0.979478	-0.00175514	-0.653062	0.515435	0.718128
NVEC200_001067_1.1	4.26923	0.0290169	0.238933	0.811719	0.922725	0.0537163	0.447515	0.655613	0.867667	0.0413666	0.481681	0.63124	0.894557	0.0144771	1.06888	0.288077	0.521209	-0.126726	-1.49277	0.139108	0.592788	0.0246994	0.145514	0.884641	0.954267	0.000595922	0.208847	0.835055	0.919083
NVEC200_001068_1.1	6.39989	-0.11881	-1.97829	0.0510536	0.236048	-0.0341269	-0.58015	0.56331	0.819948	-0.0764686	-1.80029	0.0752748	0.493569	0.0181228	2.73901	0.00747189	0.0473311	0.0429725	1.03543	0.303334	0.742843	0.0846834	1.01818	0.311411	0.582013	-0.00382364	-2.71006	0.00809962	0.0516745
NVEC200_001069_1.1	4.38777	0.0707554	0.747777	0.456607	0.7233	-0.0411595	-0.453449	0.651352	0.866555	0.0147979	0.22098	0.825625	0.964277	0.00654139	0.640471	0.523547	0.728027	0.102682	1.61135	0.110718	0.55717	-0.111915	-0.87265	0.385251	0.654092	-0.00443672	-2.0594	0.0424399	0.157203
NVEC200_001070_1.1	0.481279	0.611808	0.791607	0.431168	0.706764	1.89033	2.43316	0.0174308	0.145482	1.25107	2.28921	0.0249772	0.380294	0.0293592	0.363158	0.717542	0.85862	0.0899101	0.173795	0.86251	0.971644	1.27853	1.16368	0.248364	0.517168	0.0323152	2.03624	0.0453742	0.164261
NVEC200_001071_1.1	4.80468	0.152185	1.87541	0.0640843	0.265449	0.0460487	0.584611	0.56032	0.818314	0.0991167	1.72661	0.0877801	0.517587	-0.00768651	-0.867381	0.388115	0.618202	0.033056	0.598252	0.551223	0.879525	-0.106136	-0.953237	0.343106	0.613726	0.00128659	0.689646	0.492249	0.699862
NVEC200_001072_1.1	5.76819	-0.0910526	-1.32257	0.189439	0.478128	0.126444	1.87291	0.0644323	0.297945	0.0176957	0.363435	0.71716	0.923632	0.0159604	2.10126	0.0385051	0.14683	-0.0056846	-0.119321	0.905296	0.982235	0.217497	2.27847	0.0251431	0.123151	0.00411764	2.5549	0.0123572	0.0691804
NVEC200_001073_1.1	7.63789	0.00407063	0.0743809	0.940878	0.978106	-0.209872	-3.8706	0.00020917	0.00931715	-0.102901	-2.65898	0.00932527	0.294604	-0.0225662	-3.70853	0.000366014	0.00516621	-0.106433	-2.78538	0.00655839	0.20653	-0.213943	-2.79013	0.00647082	0.046549	0.00724842	5.57085	2.77548e-07	1.88805e-05
NVEC200_001076_1.1	5.45336	-0.27389	-3.64107	0.000459973	0.0104527	0.289295	3.95515	0.000155326	0.00761611	0.0077025	0.144754	0.88524	0.978389	0.0359753	4.37056	3.40959e-05	0.000820304	0.0990256	1.92097	0.058004	0.456824	0.563184	5.44676	4.68001e-07	2.3234e-05	-0.00819183	-4.69371	9.89455e-06	0.000313514
NVEC200_001077_1.1	4.13249	0.0464695	0.466341	0.642134	0.838052	-0.00567429	-0.0583351	0.953615	0.987098	0.0203976	0.289403	0.77296	0.944703	0.0077788	0.708685	0.480411	0.694926	-0.0274419	-0.400573	0.689714	0.922703	-0.0521438	-0.379174	0.70548	0.866278	-0.000910634	-0.393702	0.694763	0.838124
NVEC200_001078_1.1	3.19345	0.344983	2.39742	0.0186461	0.129585	0.142584	1.0308	0.305488	0.64197	0.243784	2.39401	0.0188091	0.347191	0.00507715	0.328219	0.743533	0.871097	0.0582673	0.602769	0.548227	0.878292	-0.202399	-1.03553	0.303285	0.573224	0.000501394	0.156313	0.876148	0.941141
NVEC200_001079_1.1	3.98194	0.270566	2.44757	0.0163878	0.120067	-0.0307162	-0.288868	0.773368	0.924343	0.119925	1.53306	0.128883	0.577829	-0.0355571	-2.97155	0.00382891	0.0295126	0.0612902	0.828311	0.409757	0.812577	-0.301282	-2.00514	0.0480503	0.19099	-0.000588625	-0.235324	0.814509	0.908013
NVEC200_001080_1.1	5.42589	-0.0584589	-0.871516	0.385866	0.671721	-0.0361832	-0.551959	0.582389	0.831868	-0.047321	-0.997423	0.32132	0.745669	0.00944201	1.27867	0.204407	0.423204	-0.00130015	-0.0281304	0.977622	0.997724	0.0222757	0.240346	0.810626	0.918613	0.0019494	1.24398	0.216841	0.432978
NVEC200_001081_1.1	5.31615	0.207867	0.860997	0.392089	0.675635	0.0364869	0.161437	0.8722	0.961217	0.122177	0.714121	0.477454	0.831654	0.0146754	0.583718	0.561228	0.753896	0.496661	3.16513	0.0022697	0.123084	-0.17138	-0.537524	0.592558	0.801773	0.00445947	0.840741	0.403268	0.625903
NVEC200_001082_1.1	4.23999	-0.0642686	-0.477299	0.634362	0.833477	0.149909	1.17641	0.242682	0.57639	0.04282	0.449046	0.65453	0.902207	-0.00318335	-0.222586	0.824387	0.917611	0.236011	2.66218	0.00926699	0.235389	0.214177	1.19051	0.237128	0.504998	-0.0131799	-4.36561	3.52011e-05	0.00086557
NVEC200_001083_1.1	9.07949	0.118394	1.27944	0.204705	0.495891	0.0793153	0.86703	0.388705	0.713318	0.0988548	1.51069	0.135091	0.585412	-0.0112672	-1.09932	0.275162	0.506461	0.0248183	0.385221	0.701169	0.925611	-0.0390788	-0.302088	0.763426	0.896081	-0.00624846	-2.85395	0.00558579	0.0395119
NVEC200_001084_1.1	2.91578	0.738495	4.25067	5.32876e-05	0.00203453	-0.287338	-1.79021	0.0768921	0.327425	0.225579	1.83042	0.0706042	0.481691	-0.0573283	-3.23911	0.00169758	0.0163302	0.206837	1.89354	0.0616034	0.463051	-1.02583	-4.53618	1.81932e-05	0.000510655	-0.000194064	-0.0528884	0.957942	0.97986
NVEC200_001086_1.1	4.70263	-0.111782	-1.32151	0.189788	0.478519	0.0349882	0.428098	0.669635	0.875066	-0.0383971	-0.641586	0.522826	0.852809	-0.00160384	-0.17412	0.862175	0.937367	0.0656056	1.14635	0.254789	0.709324	0.14677	1.27064	0.207239	0.466117	0.000732848	0.376442	0.707503	0.846278
NVEC200_001088_1.1	1.05405	-0.468577	-1.63059	0.106584	0.353956	-0.278849	-1.0284	0.306609	0.643142	-0.373713	-1.83604	0.0697605	0.479394	-0.0369132	-1.20858	0.230093	0.455884	0.186113	1.00214	0.319047	0.754302	0.189728	0.495721	0.621339	0.819736	0.00525391	0.811979	0.419016	0.640002
NVEC200_001090_1.1	4.1287	-0.0306864	-0.351091	0.726367	0.883804	0.0909451	1.0667	0.289053	0.62734	0.0301293	0.487353	0.627231	0.893485	0.00841513	0.875378	0.383774	0.614801	-0.0147888	-0.246159	0.806138	0.956905	0.121631	1.0091	0.315718	0.584865	0.00471328	2.33286	0.0219585	0.102218
NVEC200_001092_1.1	0.647755	-0.816963	-2.41682	0.0177416	0.12557	0.291304	0.891858	0.374924	0.702691	-0.262829	-1.09894	0.274819	0.712694	0.012925	0.354855	0.723555	0.861205	0.157872	0.699077	0.486365	0.848258	1.10827	2.40078	0.0184864	0.0991589	-0.00113967	-0.147899	0.882764	0.944414
NVEC200_001093_1.1	7.78796	-0.0310504	-0.539329	0.591035	0.810235	0.304041	5.3445	7.17101e-07	0.000137751	0.136495	3.35264	0.00118573	0.168809	-0.027789	-4.35609	3.59978e-05	0.000859333	0.0164974	0.412144	0.681245	0.920898	0.335091	4.16538	7.28979e-05	0.00150877	0.000318284	0.233833	0.815663	0.908888
NVEC200_001095_1.1	6.97374	0.199829	2.74117	0.00742703	0.07342	-0.220448	-3.09283	0.00266346	0.0513237	-0.0103095	-0.19995	0.841985	0.96758	-0.0296178	-3.70466	0.000370869	0.00519893	0.146164	2.92016	0.00445246	0.176245	-0.420276	-4.17047	7.15539e-05	0.00149099	0.000401561	0.235531	0.814349	0.907918
NVEC200_001096_1.1	8.35057	-0.13192	-2.39163	0.018924	0.131183	-0.132362	-2.42403	0.0174155	0.145465	-0.132141	-3.38777	0.0010594	0.164864	0.00341704	0.558117	0.578195	0.765895	-0.038922	-1.01061	0.315001	0.751516	-0.000442001	-0.00572409	0.995446	0.997962	0.00287851	2.19691	0.03068	0.127036
NVEC200_001097_1.1	7.42064	-0.416067	-1.41626	0.160998	0.438095	-0.0175427	-0.0612563	0.951324	0.986594	-0.216805	-1.04333	0.300274	0.731272	-0.0368648	-1.1467	0.25529	0.485541	0.325378	1.62041	0.109502	0.556613	0.398524	0.984333	0.328239	0.598317	-0.0010496	-0.152435	0.879269	0.942836
NVEC200_001098_1.1	5.20151	-0.25295	-0.860419	0.392406	0.675785	-0.0454074	-0.162793	0.871136	0.961057	-0.149179	-0.716631	0.475913	0.83097	-0.0306752	-0.978746	0.330973	0.564808	0.286866	1.48272	0.1425	0.597116	0.207542	0.526951	0.599843	0.806129	0.000979079	0.146908	0.883614	0.944704
NVEC200_001099_1.1	6.77685	-0.358799	-1.0439	0.300014	0.595501	-0.22394	-0.672907	0.503154	0.789808	-0.29137	-1.19823	0.234746	0.678662	-0.019614	-0.524798	0.601331	0.781146	0.298685	1.28125	0.204205	0.661065	0.134858	0.2867	0.775163	0.903064	-0.0012261	-0.152991	0.878832	0.94246
NVEC200_001100_1.1	8.84563	-0.00877984	-0.0578648	0.954016	0.982301	-0.180191	-1.20356	0.232689	0.565464	-0.0944854	-0.880579	0.381466	0.781566	-0.0149294	-0.889807	0.376523	0.607466	0.119535	1.1341	0.2605	0.713768	-0.171411	-0.809652	0.420799	0.685842	-0.0071929	-2.00393	0.0488279	0.172151
NVEC200_001101_1.1	2.9176	0.0960965	0.598282	0.551203	0.784841	0.232136	1.47919	0.142693	0.448653	0.164116	1.4446	0.152155	0.603799	-0.0160244	-0.90763	0.366576	0.599356	-0.0794122	-0.726791	0.469301	0.840837	0.13604	0.613135	0.541384	0.768119	-0.000658523	-0.17963	0.85786	0.930522
NVEC200_001102_1.1	4.80688	-0.0577523	-0.702937	0.483968	0.743145	0.171703	2.15976	0.0335371	0.209611	0.0569754	0.9802	0.3297	0.750184	-0.00367526	-0.410619	0.68236	0.838153	0.0589703	1.05937	0.29236	0.734423	0.229455	2.04203	0.0441714	0.180473	-0.00803692	-4.25007	5.3407e-05	0.00114822
NVEC200_001103_1.1	4.44306	-0.033047	-0.295171	0.768565	0.902631	-0.0042613	-0.0392272	0.968799	0.989833	-0.0186542	-0.235523	0.814355	0.962411	0.00461541	0.376758	0.707269	0.852869	0.00817039	0.106998	0.915036	0.983843	0.0287857	0.187464	0.851732	0.940133	0.000332906	0.128782	0.897827	0.950344
NVEC200_001105_1.1	5.22355	-0.0790993	-1.13265	0.260466	0.55816	0.0427014	0.623126	0.534829	0.805512	-0.018199	-0.368475	0.713412	0.922569	0.00882887	1.14315	0.256106	0.486189	-0.0511737	-1.05896	0.292542	0.734562	0.121801	1.25704	0.212097	0.473149	0.0019987	1.22192	0.225031	0.442645
NVEC200_001106_1.1	3.71688	-0.0242721	-0.200231	0.841766	0.936533	-0.112716	-0.971927	0.333776	0.667552	-0.0684941	-0.798303	0.426864	0.809097	0.0142804	1.09043	0.278528	0.50996	0.0673208	0.825558	0.411309	0.813297	-0.0884441	-0.539844	0.590681	0.800728	-0.0119387	-4.28416	4.70732e-05	0.00106784
NVEC200_001107_1.1	4.73255	-0.53916	-3.59851	0.0005697	0.0122875	0.467734	3.14208	0.00239756	0.0482992	-0.0357135	-0.337088	0.736987	0.929572	-0.0164414	-0.985241	0.327656	0.561892	-0.0946701	-0.913752	0.363759	0.785373	1.00689	4.78297	8.37248e-06	0.000264079	0.00235475	0.667784	0.50631	0.710262
NVEC200_001108_1.1	5.21691	0.217588	3.15698	0.00218974	0.0324635	-0.20593	-3.05647	0.00297262	0.0547544	0.00582865	0.119566	0.905102	0.981546	-0.0351099	-4.62352	1.2997e-05	0.00038135	-0.036751	-0.778464	0.438403	0.826013	-0.423518	-4.44605	2.56484e-05	0.000675205	0.00103788	0.646388	0.519726	0.721346
NVEC200_001109_1.1	7.01595	0.169181	2.72527	0.00776417	0.0753236	-0.0998534	-1.62809	0.107115	0.390707	0.0346636	0.789615	0.431895	0.810487	-0.0224248	-3.25747	0.00160274	0.0156755	-0.0653556	-1.51336	0.133805	0.586128	-0.269034	-3.10199	0.0025904	0.0239087	0.00224938	1.53309	0.128876	0.315764
NVEC200_001110_1.1	2.97722	0.370197	2.15651	0.0337971	0.1858	-0.0318052	-0.201321	0.840917	0.950335	0.169196	1.38904	0.168358	0.6197	0.0113773	0.650919	0.516811	0.7239	0.339493	3.10243	0.00258697	0.132121	-0.402002	-1.80675	0.0742512	0.2544	-0.0137746	-3.75185	0.000315622	0.00466377
NVEC200_001111_1.1	5.31841	-0.0570141	-0.710257	0.479441	0.739727	-0.0216765	-0.277824	0.781805	0.92811	-0.0393453	-0.692891	0.49022	0.838214	0.0130574	1.48534	0.141062	0.338286	0.0418166	0.760641	0.448924	0.83153	0.0353377	0.320399	0.749433	0.889695	-0.00574812	-3.07962	0.00277216	0.0241367
NVEC200_001112_1.1	3.09096	-0.0553354	-0.38088	0.704219	0.872309	-0.131079	-0.941461	0.34907	0.682269	-0.0932073	-0.906476	0.367183	0.77408	0.00465605	0.296012	0.767925	0.884751	0.0594215	0.608347	0.54454	0.876529	-0.0757438	-0.385062	0.70113	0.864649	-0.00537781	-1.61702	0.109488	0.285427
NVEC200_001113_1.1	3.61329	-0.0954601	-0.880769	0.380865	0.668053	0.185691	1.74778	0.0840226	0.342612	0.0451154	0.588564	0.557676	0.867865	0.0099179	0.827776	0.410058	0.637972	-0.049898	-0.667104	0.506468	0.858066	0.281151	1.87159	0.0646167	0.232212	0.00169102	0.673146	0.502635	0.707832
NVEC200_001114_1.1	5.24086	0.130649	1.69452	0.0937372	0.330076	0.0316063	0.416291	0.67822	0.880469	0.0811276	1.4879	0.140387	0.591474	-0.00162186	-0.189852	0.849866	0.931554	-0.0911498	-1.70439	0.0918706	0.521466	-0.0990425	-0.922536	0.358796	0.6288	0.00150118	0.83264	0.407323	0.629416
NVEC200_001115_1.1	5.3673	0.0740937	1.05557	0.294083	0.590376	-0.0841355	-1.22802	0.222745	0.553894	-0.00502089	-0.101128	0.919681	0.985067	-0.00550496	-0.713613	0.477373	0.693304	-0.00762086	-0.158171	0.874688	0.975562	-0.158229	-1.63355	0.105961	0.316261	0.00235717	1.44206	0.152868	0.350235
NVEC200_001116_1.1	4.41189	0.161706	1.40137	0.164654	0.443747	0.0787698	0.713432	0.477484	0.775865	0.120238	1.47217	0.144575	0.595909	-0.0280587	-2.26054	0.0262786	0.113215	0.10646	1.38557	0.169413	0.629235	-0.0829367	-0.531727	0.596268	0.804226	-0.00651097	-2.49768	0.0143789	0.0767917
NVEC200_001117_1.1	2.22043	0.156001	0.718673	0.474265	0.734889	-0.0265673	-0.123322	0.902136	0.970746	0.0647169	0.421623	0.674339	0.909646	0.0414156	1.70076	0.092554	0.257551	-0.101846	-0.661141	0.510265	0.858619	-0.182568	-0.599261	0.550553	0.774493	-0.00652957	-1.27854	0.204453	0.417742
NVEC200_001118_1.1	1.98994	-0.0779882	-0.375056	0.70853	0.87439	0.0311411	0.158577	0.874369	0.96201	-0.0234236	-0.159046	0.874001	0.975469	-0.0248684	-1.12388	0.264149	0.494209	0.194877	1.43458	0.154986	0.616036	0.109129	0.393671	0.694785	0.861687	-0.00134171	-0.28983	0.772635	0.887073
NVEC200_001119_1.1	10.1231	0.227566	4.23815	5.5809e-05	0.0021242	-0.0306975	-0.578667	0.564306	0.820432	0.0984344	2.59238	0.0111758	0.309447	-0.0135685	-2.28291	0.0248684	0.109151	0.0278254	0.744758	0.458421	0.836177	-0.258264	-3.44276	0.000886775	0.0108155	-0.00225814	-1.779	0.0787253	0.232731
NVEC200_001120_1.1	3.17476	-0.0799881	-0.533873	0.594789	0.812654	0.310444	2.14845	0.0344511	0.21277	0.115228	1.08693	0.280065	0.718086	0.0435635	2.68469	0.00868883	0.0528291	0.0601247	0.589164	0.557275	0.880673	0.390433	1.91197	0.0591654	0.219222	0.00256856	0.762962	0.447546	0.663867
NVEC200_001121_1.1	5.44879	0.103469	1.47911	0.142715	0.40994	-0.085938	-1.2615	0.210495	0.539066	0.00876524	0.177141	0.859809	0.971105	-0.0350091	-4.56181	1.64895e-05	0.000456581	0.0303839	0.637275	0.525616	0.867602	-0.189407	-1.96672	0.0523969	0.202187	0.00351491	2.16428	0.0331771	0.133731
NVEC200_001124_1.1	6.18422	0.0581523	0.886197	0.37795	0.666263	0.00830137	0.1293	0.897418	0.969325	0.0332268	0.715919	0.475955	0.83097	0.0180972	2.50747	0.0140131	0.07445	0.0447201	0.987133	0.32631	0.759049	-0.0498509	-0.549179	0.584287	0.796289	-0.00334552	-2.18083	0.0318895	0.130249
NVEC200_001128_1.1	5.33746	-0.116822	-1.86514	0.065526	0.268642	0.26917	4.45106	2.51654e-05	0.00209043	0.0761739	1.71886	0.0891902	0.518933	0.0261283	3.84716	0.000227008	0.00363389	0.156093	3.6739	0.000411698	0.0516471	0.385992	4.51636	1.96268e-05	0.000539803	-0.00343369	-2.3931	0.0188533	0.092417
NVEC200_001129_1.1	3.55712	-0.145448	-1.1789	0.241644	0.538015	-0.0225716	-0.187722	0.851531	0.953625	-0.0840098	-0.962657	0.338383	0.758336	-0.00464801	-0.341707	0.733394	0.865292	-0.0477694	-0.565146	0.573426	0.884625	0.122876	0.722865	0.471698	0.723604	0.00811756	2.83129	0.00575577	0.0403437
NVEC200_001130_1.1	1.91202	-0.580111	-2.36146	0.0204318	0.137487	0.209037	0.912614	0.363963	0.695024	-0.185537	-1.06548	0.2896	0.722179	0.0731771	2.85691	0.00534812	0.0372111	0.198873	1.23594	0.219801	0.676224	0.789149	2.44311	0.0165784	0.0922239	-0.000421636	-0.0790376	0.937184	0.970089
NVEC200_001131_1.1	0.0334653	1.08285	1.58992	0.116006	0.369392	1.56124	2.35402	0.0211574	0.161961	1.32204	2.74419	0.00756524	0.281401	-0.0101504	-0.148117	0.882643	0.946851	0.0269206	0.0624214	0.950391	0.991514	0.478385	0.510231	0.611369	0.814411	0.00347381	0.258968	0.79636	0.899687
NVEC200_001132_1.1	3.63403	-0.071283	-0.601743	0.548907	0.783406	0.168863	1.46452	0.146649	0.454558	0.04879	0.582253	0.561899	0.869257	0.0375432	2.88681	0.00490582	0.0348423	-0.00907156	-0.110936	0.911922	0.983842	0.240146	1.4733	0.144274	0.378912	0.00542607	1.99363	0.0493191	0.172941
NVEC200_001133_1.1	3.49403	-0.105175	-0.879439	0.381581	0.66832	-0.0616957	-0.533334	0.59516	0.839551	-0.0834354	-0.986092	0.326817	0.749467	-0.0269155	-2.05465	0.0429075	0.157652	-0.00074056	-0.00917719	0.992699	0.999586	0.0434794	0.265932	0.790919	0.909765	-0.00106379	-0.38512	0.701087	0.842088
NVEC200_001134_1.1	4.80572	-0.275457	-3.36115	0.00115387	0.0208613	0.15252	1.88103	0.0633069	0.295817	-0.0614689	-1.06067	0.291771	0.72436	-0.00254227	-0.277928	0.781725	0.892984	-0.105198	-1.8441	0.0685652	0.48185	0.427977	3.7325	0.000337255	0.00509989	0.00129931	0.670754	0.504151	0.708995
NVEC200_001135_1.1	6.06161	-0.206153	-3.22413	0.00177882	0.0282543	0.108807	1.72859	0.0874229	0.349862	-0.0486728	-1.07639	0.284721	0.719203	0.0100573	1.41955	0.159304	0.363356	-0.0416387	-0.938139	0.350765	0.777529	0.31496	3.53859	0.000647614	0.00844385	0.00108575	0.720273	0.473284	0.685331
NVEC200_001136_1.1	4.42999	0.0974904	0.99218	0.323856	0.616902	0.000645324	0.00688446	0.994523	0.997349	0.0490679	0.705436	0.48242	0.834321	-0.00787422	-0.747563	0.456736	0.67738	0.141731	2.16739	0.0329318	0.381024	-0.0968451	-0.731453	0.466464	0.720079	-0.00171977	-0.775857	0.439934	0.657235
NVEC200_001139_1.1	4.45175	-0.0200351	-0.220454	0.826033	0.928937	0.0782986	0.866487	0.388602	0.713269	0.0291317	0.453316	0.651448	0.901101	-0.018837	-1.84615	0.0682646	0.21177	-0.173955	-2.74134	0.00742344	0.217051	0.0983337	0.769489	0.443683	0.703316	-0.0034985	-1.62578	0.107606	0.282191
NVEC200_001140_1.1	3.19221	-0.0963717	-0.73714	0.463017	0.728484	-0.16434	-1.30884	0.194029	0.520373	-0.130356	-1.40894	0.162411	0.611875	0.000446887	0.0314812	0.974958	0.989526	0.0482936	0.547752	0.585262	0.888648	-0.0679688	-0.383109	0.702572	0.864687	0.00674457	2.25153	0.0268657	0.116385
NVEC200_001141_1.1	2.22748	-0.433606	-2.70139	0.00829686	0.0785836	0.233508	1.49421	0.138733	0.442663	-0.100049	-0.881179	0.380644	0.781112	0.0609563	3.4558	0.000849926	0.00986685	0.0338557	0.303949	0.761891	0.941772	0.667114	3.01966	0.00331925	0.0286565	0.00721165	1.95842	0.0533787	0.181985
NVEC200_001142_1.1	5.32615	0.105705	1.39161	0.167581	0.447308	-0.109416	-1.47211	0.144592	0.451962	-0.00185509	-0.03453	0.972533	0.9946	0.00563146	0.672767	0.502875	0.712796	-0.0185987	-0.354849	0.72356	0.931586	-0.215121	-2.04709	0.0436606	0.17904	-0.00297938	-1.67901	0.0967309	0.264034
NVEC200_001143_1.1	-0.0300394	0.230986	0.477562	0.634157	0.833438	0.914435	1.91439	0.058851	0.285142	0.57271	1.6744	0.097636	0.530817	0.0293562	0.558269	0.578092	0.765895	-0.058774	-0.178562	0.858696	0.97115	0.683449	1.01182	0.314425	0.584243	0.00187129	0.174337	0.862005	0.932549
NVEC200_001144_1.1	3.69469	-0.00568478	-0.0506341	0.959733	0.985217	-0.0515752	-0.471724	0.638303	0.860638	-0.02863	-0.360507	0.71934	0.924078	0.0121868	0.986572	0.326583	0.560882	-0.0333728	-0.432371	0.666539	0.915705	-0.0458904	-0.296903	0.767247	0.898021	-0.00304487	-1.16804	0.245975	0.468549
NVEC200_001145_1.1	4.67536	-0.0297639	-0.378811	0.705749	0.873061	0.0115888	0.152424	0.879205	0.963793	-0.00908756	-0.163478	0.87052	0.974964	0.0238002	2.7777	0.00670235	0.0440374	0.0444075	0.82757	0.410174	0.812964	0.0413528	0.384818	0.701309	0.864649	-0.000153689	-0.0849396	0.932504	0.968029
NVEC200_001146_1.1	1.21747	-0.115649	-0.433587	0.665659	0.851839	-0.123774	-0.48018	0.632302	0.858353	-0.119712	-0.634354	0.527511	0.854263	-0.0373732	-1.27698	0.205	0.423735	-0.0549808	-0.308153	0.758701	0.941198	-0.00812491	-0.0223023	0.982258	0.992967	0.00365667	0.597573	0.551674	0.743916
NVEC200_001147_1.1	4.80039	0.0762295	0.846716	0.399472	0.680893	-0.141044	-1.60411	0.112308	0.399627	-0.0324074	-0.508924	0.612092	0.887403	0.00434058	0.437805	0.66261	0.82384	-0.0362194	-0.583989	0.560736	0.880867	-0.217274	-1.74782	0.0840159	0.273095	-0.00140604	-0.669637	0.504859	0.709435
NVEC200_001148_1.1	0.922814	-0.00399373	-0.0123474	0.990177	0.995205	0.494933	1.53384	0.128692	0.427258	0.245469	1.07327	0.286112	0.720202	0.0574854	1.58366	0.116892	0.300453	-0.137754	-0.599981	0.550076	0.878834	0.498926	1.09334	0.277257	0.547214	-0.0125184	-1.64639	0.103284	0.275668
NVEC200_001149_1.1	4.38242	-0.303553	-2.81092	0.0061001	0.0647793	-0.0249214	-0.241674	0.8096	0.937657	-0.164237	-2.14851	0.0344465	0.402553	-0.0213919	-1.84056	0.0690881	0.213404	0.172842	2.41186	0.0179691	0.304386	0.278632	1.91285	0.0590501	0.218927	0.00550032	2.23479	0.0279883	0.119358
NVEC200_001150_1.1	4.88571	0.127084	1.41215	0.161467	0.438689	0.113181	1.29082	0.200179	0.526868	0.120133	1.8872	0.0624611	0.468309	-0.00973907	-0.986421	0.326657	0.560882	-0.00506073	-0.0822708	0.93462	0.989153	-0.0139025	-0.112156	0.910958	0.966195	-0.0117721	-5.64154	2.05643e-07	1.49596e-05
NVEC200_001151_1.1	4.93273	-0.0830488	-1.12873	0.262107	0.56031	-0.0178508	-0.246431	0.805928	0.936818	-0.0504498	-0.969572	0.334942	0.755064	0.032612	3.98787	0.000138285	0.00243913	-0.0909076	-1.76822	0.0805231	0.503714	0.0651979	0.636518	0.526107	0.758794	0.00153618	0.887078	0.377478	0.603317
NVEC200_001152_1.1	3.68292	-0.253269	-1.87644	0.0639416	0.265165	0.00733461	0.0558199	0.955613	0.987195	-0.122967	-1.28795	0.201172	0.647945	0.0409453	2.75287	0.00718735	0.0459736	-0.0024016	-0.0257053	0.979551	0.997936	0.260604	1.40295	0.164183	0.407112	0.00285912	0.909402	0.365646	0.593041
NVEC200_001153_1.1	1.27192	-0.663362	-2.19798	0.0306007	0.176674	-0.345009	-1.16772	0.246105	0.579923	-0.504186	-2.362	0.0204037	0.356252	-0.00116292	-0.0349162	0.972226	0.988013	0.0129061	0.0623435	0.950432	0.991514	0.318354	0.762089	0.448064	0.706234	0.0121768	1.69922	0.092844	0.257804
NVEC200_001154_1.1	2.97335	-0.0860233	-0.530897	0.59684	0.813566	0.0820878	0.523962	0.601635	0.843386	-0.00196775	-0.0171645	0.986345	0.996413	0.0322729	1.82481	0.0714546	0.218252	-0.000915271	-0.00825325	0.993434	0.999586	0.168111	0.759219	0.44977	0.707999	0.00221746	0.599788	0.550204	0.742723
NVEC200_001155_1.1	6.94552	-0.0418816	-0.640249	0.52369	0.766915	0.00938066	0.146085	0.884191	0.964808	-0.0162505	-0.351263	0.726239	0.925665	-0.0111698	-1.54941	0.124906	0.3119	0.0821519	1.81838	0.0724402	0.48807	0.0512623	0.56459	0.573803	0.790136	0.00117851	0.766132	0.445668	0.662428
NVEC200_001156_1.1	4.80111	-0.132495	-1.80807	0.0740442	0.287508	-0.103694	-1.4408	0.153224	0.464661	-0.118095	-2.27871	0.025128	0.380349	0.0104344	1.2835	0.202717	0.421132	-0.0593288	-1.16748	0.246201	0.703471	0.0288013	0.283023	0.77783	0.904309	0.00198597	1.15056	0.253058	0.476723
NVEC200_001157_1.1	1.79876	-0.316142	-1.57585	0.118684	0.373811	0.0439702	0.223808	0.82343	0.94344	-0.136086	-0.959102	0.34016	0.758521	0.0743202	3.32047	0.00131372	0.0136179	-0.0378915	-0.265727	0.791077	0.950035	0.360112	1.2964	0.198259	0.452979	0.00310015	0.660054	0.510959	0.714158
NVEC200_001158_1.1	2.25561	-0.221467	-1.29209	0.199743	0.490833	-0.0580889	-0.35561	0.722992	0.904862	-0.139778	-1.15195	0.252493	0.693673	0.00201039	0.109039	0.913422	0.961011	0.0667778	0.58465	0.560293	0.880867	0.163378	0.708134	0.480751	0.728871	0.00409153	1.05954	0.292283	0.521074
NVEC200_001159_1.1	3.73472	0.0512453	0.462012	0.645224	0.840174	0.0889998	0.824388	0.411969	0.730122	0.0701226	0.893744	0.37392	0.777498	-0.00142697	-0.117231	0.906946	0.958356	-0.0196184	-0.2589	0.796323	0.951903	0.0377544	0.24738	0.805196	0.915792	-0.00632335	-2.47061	0.0154349	0.080752
NVEC200_001161_1.1	3.87294	0.180658	1.17458	0.243564	0.539811	0.0906666	0.59452	0.553801	0.813725	0.135662	1.24733	0.215826	0.660871	0.00532224	0.310206	0.757191	0.877626	-0.134749	-1.25268	0.213884	0.669738	-0.0899912	-0.417273	0.677569	0.852058	0.00358076	0.997751	0.321335	0.551519
NVEC200_001162_1.1	4.87065	-0.239146	-2.46395	0.0157052	0.117018	0.0885954	0.937493	0.351095	0.684485	-0.0752752	-1.09643	0.27591	0.713513	-0.0221484	-2.0766	0.0407824	0.152517	0.0314142	0.475305	0.635758	0.906987	0.327741	2.45322	0.0161495	0.0904521	0.00598217	2.6491	0.00958114	0.0577259
NVEC200_001164_1.1	4.94762	0.177182	2.38251	0.0193689	0.132955	-0.193508	-2.68826	0.00860368	0.101325	-0.00816316	-0.155152	0.87706	0.976594	-0.00143889	-0.177668	0.859396	0.936343	0.0401939	0.794659	0.42897	0.823759	-0.37069	-3.64346	0.000456289	0.00647015	-0.000763294	-0.445309	0.657201	0.814675
NVEC200_001167_1.1	5.10414	-0.353187	-4.87244	4.8938e-06	0.000324404	0.163988	2.33307	0.0219473	0.164524	-0.0945996	-1.84476	0.0684691	0.478726	0.0214161	2.70681	0.00817299	0.0505935	0.0823515	1.66747	0.0990107	0.536701	0.517175	5.20544	1.27363e-06	5.49404e-05	-0.000745582	-0.444324	0.657909	0.815028
NVEC200_001168_1.1	6.19733	-0.105539	-1.82732	0.0710729	0.281708	0.144955	2.5449	0.0126908	0.123924	0.019708	0.482525	0.630643	0.894557	0.0209246	3.26624	0.00155923	0.0154148	-0.0419342	-1.04172	0.300422	0.74033	0.250494	3.11002	0.00252792	0.023391	0.00236189	1.73447	0.0863699	0.247225
NVEC200_001169_1.1	2.81471	0.362903	2.5642	0.0120541	0.0990594	-0.277588	-2.01998	0.0464562	0.251999	0.0426577	0.426074	0.671104	0.908297	-0.0314969	-2.03443	0.0449478	0.162624	-0.0601254	-0.626513	0.532616	0.869951	-0.640491	-3.29719	0.00141427	0.0154965	0.00408769	1.26047	0.210864	0.426027
NVEC200_001170_1.1	3.45367	-0.261756	-2.15669	0.0337833	0.1858	0.297393	2.5161	0.0136977	0.129738	0.0178184	0.20755	0.836065	0.965929	0.0599348	4.49282	2.14715e-05	0.000557949	0.0368313	0.437883	0.662554	0.914752	0.559149	3.34635	0.00120978	0.0136325	-0.00542674	-1.94507	0.0549905	0.185831
NVEC200_001171_1.1	2.97557	-0.284562	-1.4822	0.141916	0.408652	-0.159101	-0.867854	0.387873	0.712888	-0.221832	-1.63232	0.106243	0.542836	-0.0144682	-0.698048	0.487017	0.700484	0.106502	0.83499	0.406021	0.810986	0.125461	0.484479	0.629269	0.825044	0.00117901	0.268676	0.788818	0.895533
NVEC200_001172_1.1	5.56811	0.215041	2.243	0.0274854	0.165128	0.0236797	0.253955	0.800141	0.934691	0.11936	1.76001	0.0819861	0.505136	-0.0173084	-1.6525	0.102105	0.275704	0.0450032	0.688556	0.492969	0.851441	-0.191361	-1.45177	0.150229	0.386712	-0.00129482	-0.585121	0.560009	0.749157
NVEC200_001173_1.1	4.13187	0.280151	1.91919	0.0584057	0.253332	0.309707	2.21645	0.0294034	0.193618	0.294929	2.85458	0.00544391	0.260996	-0.0337714	-2.15955	0.0337	0.134474	0.137119	1.42113	0.159034	0.620688	0.0295565	0.149727	0.881344	0.952549	-0.00800946	-2.46332	0.0158375	0.0820975
NVEC200_001174_1.1	5.64239	-0.240737	-3.09517	0.00264461	0.0360635	0.286509	3.76601	0.000300636	0.0121964	0.0228859	0.416023	0.678416	0.910789	-0.0464269	-5.4152	5.34091e-07	2.91828e-05	0.0383551	0.722867	0.471697	0.841872	0.527246	4.90177	4.35422e-06	0.000151217	0.00143842	0.792585	0.430172	0.649043
NVEC200_001175_1.1	3.7607	-0.0797886	-0.755916	0.451737	0.720107	0.068237	0.672052	0.503328	0.789813	-0.00577579	-0.0773271	0.938541	0.988301	-0.0010052	-0.087833	0.930211	0.968188	0.0848043	1.19294	0.236129	0.694253	0.148026	1.03171	0.30506	0.575393	0.00557829	2.32211	0.0225583	0.10387
NVEC200_001176_1.1	4.97943	-0.131988	-1.24167	0.217737	0.511108	-0.007128	-0.0684344	0.945599	0.984586	-0.0695579	-0.925215	0.357444	0.770205	-0.00634955	-0.540053	0.590557	0.774042	-0.0336321	-0.458939	0.647436	0.909667	0.12486	0.847829	0.398888	0.666657	0.00282649	1.13365	0.260094	0.485147
NVEC200_001177_1.1	5.52903	-0.0393991	-0.649839	0.517505	0.763621	0.0387931	0.654842	0.514294	0.796113	-0.000302964	-0.00706496	0.994379	0.998521	0.0274821	4.12043	8.58615e-05	0.00167287	0.0190805	0.455577	0.649827	0.910534	0.0781922	0.933582	0.353099	0.624155	0.000273422	0.19342	0.84708	0.923554
NVEC200_001178_1.1	4.36263	-0.118841	-1.2131	0.22837	0.524095	-0.0568263	-0.603607	0.547673	0.81102	-0.0878335	-1.26696	0.208545	0.653447	0.0120473	1.13442	0.259729	0.489516	0.092064	1.39236	0.167355	0.627258	0.0620144	0.466181	0.642249	0.832723	-0.00590209	-2.62088	0.0103468	0.0610563
NVEC200_001179_1.1	5.32879	-0.0817439	-1.12105	0.265344	0.563605	-0.00532709	-0.075048	0.940348	0.983132	-0.0435355	-0.844058	0.400948	0.7944	0.0189753	2.37276	0.0198548	0.0938463	0.0483012	0.96445	0.337489	0.766676	0.0764168	0.761532	0.448395	0.706467	-0.00167442	-0.987127	0.326313	0.555888
NVEC200_001180_1.1	6.57264	-0.0287089	-0.502773	0.616392	0.824704	0.0180513	0.322235	0.748046	0.912983	-0.00532879	-0.131953	0.895326	0.979727	0.0102386	1.62665	0.107422	0.284622	0.0493406	1.24947	0.214839	0.671253	0.0467602	0.590348	0.556485	0.778668	-0.00244476	-1.82299	0.0717332	0.218989
NVEC200_001181_1.1	5.93385	0.0154713	0.258192	0.796867	0.915794	-0.106086	-1.80038	0.0752601	0.32408	-0.0453074	-1.06915	0.287954	0.72144	-0.00044423	-0.0669805	0.946751	0.975516	-0.0479414	-1.15401	0.251652	0.707238	-0.121557	-1.45893	0.148178	0.384334	0.00349677	2.47932	0.0150877	0.0794724
NVEC200_001182_1.1	4.47332	0.172771	1.69379	0.0938755	0.330208	-0.0851975	-0.872322	0.385429	0.710885	0.0437866	0.606508	0.545754	0.862348	0.00934223	0.851113	0.397039	0.625794	0.107324	1.56532	0.121131	0.568547	-0.257968	-1.8696	0.0648961	0.233012	-0.00693519	-2.99194	0.00360468	0.0290026
NVEC200_001183_1.1	1.12123	-0.636859	-2.07262	0.0411612	0.209625	0.358577	1.22326	0.224529	0.556636	-0.139141	-0.639682	0.524057	0.853346	0.0328284	1.0074	0.31653	0.54942	0.152808	0.752996	0.453481	0.833651	0.995435	2.40418	0.0183266	0.0985166	0.00101867	0.150611	0.880631	0.943401
NVEC200_001184_1.1	4.55322	0.167589	1.33646	0.185059	0.471428	-0.599187	-4.85897	5.51437e-06	0.000677937	-0.215799	-2.4334	0.0171096	0.336594	0.0193198	1.39174	0.167728	0.375463	-0.112757	-1.29374	0.199353	0.656797	-0.766776	-4.39743	3.23177e-05	0.000812502	-0.0038851	-1.30954	0.193974	0.403984
NVEC200_001185_1.1	4.78366	0.13074	1.64425	0.103726	0.348228	-0.128154	-1.65248	0.102035	0.379551	0.00129326	0.0229945	0.981707	0.995845	-0.00239239	-0.273772	0.784908	0.894119	-0.0302587	-0.554407	0.58072	0.887209	-0.258894	-2.36132	0.0204392	0.106495	0.003985	2.15776	0.0336971	0.135339
NVEC200_001187_1.1	2.51861	0.22662	1.35207	0.179852	0.464172	0.094224	0.591919	0.555437	0.814667	0.160422	1.35176	0.179949	0.629914	-0.00191507	-0.107119	0.914941	0.96104	0.115136	1.03848	0.301919	0.742028	-0.132396	-0.588984	0.557395	0.779356	-0.0150442	-4.00603	0.000129616	0.00232289
NVEC200_001188_1.1	0.842909	-0.384881	-1.30717	0.194593	0.484374	0.228867	0.811934	0.419041	0.735326	-0.0780074	-0.37432	0.709076	0.921568	0.032354	1.0201	0.310503	0.543624	0.162851	0.823102	0.412696	0.814527	0.613748	1.54122	0.126885	0.351969	0.000274482	0.0413218	0.967134	0.984919
NVEC200_001190_1.1	2.35527	-0.170737	-1.00491	0.317721	0.610991	0.0973101	0.580451	0.563108	0.819948	-0.0367136	-0.305564	0.760665	0.939106	-0.031155	-1.63789	0.10505	0.28033	-0.102079	-0.871405	0.385927	0.798902	0.268047	1.13069	0.261286	0.531187	0.00872755	2.19664	0.0306998	0.127036
NVEC200_001191_1.1	1.15126	-0.423524	-1.41559	0.160458	0.43808	-0.17997	-0.640115	0.523777	0.799316	-0.301747	-1.42356	0.158144	0.608994	0.0133003	0.420571	0.675103	0.833114	0.138095	0.702874	0.484007	0.847466	0.243554	0.6139	0.54088	0.767895	0.00637715	0.954535	0.342453	0.570167
NVEC200_001192_1.1	1.79073	-0.190772	-0.94436	0.347596	0.639052	0.293593	1.46254	0.147188	0.455229	0.0514107	0.359901	0.719792	0.92419	0.0134737	0.596198	0.552588	0.74802	-0.143167	-1.01392	0.313425	0.750931	0.484365	1.7062	0.0915318	0.286918	0.00638209	1.3557	0.178697	0.385151
NVEC200_001193_1.1	4.3999	-0.0921226	-0.769591	0.443625	0.715389	0.0386652	0.328821	0.743081	0.91072	-0.0267287	-0.315731	0.752962	0.935514	-0.00200318	-0.150848	0.880444	0.945757	-0.0651883	-0.786026	0.433986	0.824576	0.130788	0.786616	0.433643	0.696498	0.0127369	4.53887	1.80299e-05	0.000515488
NVEC200_001194_1.1	3.43821	0.0538125	0.389561	0.697811	0.868686	0.0433971	0.315577	0.753078	0.915276	0.0486048	0.497602	0.620018	0.890875	-0.0377474	-2.42215	0.0175	0.0865253	-0.159071	-1.65642	0.101233	0.542528	-0.0104154	-0.0535563	0.957411	0.984231	0.00568015	1.74604	0.0843278	0.242964
NVEC200_001195_1.1	3.41806	0.0456195	0.353685	0.724429	0.882931	0.342503	2.76683	0.00691093	0.0900986	0.194061	2.12594	0.0363359	0.407565	-0.0342848	-2.46923	0.0154907	0.0799842	0.114939	1.3452	0.182051	0.645803	0.296883	1.69742	0.0931858	0.290694	0.00867732	3.02663	0.00325091	0.0269043
NVEC200_001196_1.1	3.23338	0.303671	1.9435	0.0551823	0.246695	0.0583589	0.378537	0.705952	0.895479	0.181015	1.63822	0.104981	0.54071	-0.0218285	-1.25565	0.212597	0.4333	-0.118627	-1.09626	0.275983	0.725252	-0.245312	-1.12524	0.263577	0.532628	0.0146102	4.03354	0.000117466	0.00214262
NVEC200_001197_1.1	1.63233	-0.0940667	-0.418572	0.676559	0.856867	0.0605381	0.285582	0.775876	0.925349	-0.0167643	-0.105315	0.916368	0.984425	0.0218663	0.916506	0.36193	0.594813	0.153302	1.03202	0.304916	0.744664	0.154605	0.516711	0.606666	0.811573	0.0121329	2.4473	0.0163994	0.0840758
NVEC200_001198_1.1	4.98891	-0.0129449	-0.176416	0.860376	0.943721	-0.0751224	-1.04719	0.297906	0.63637	-0.0440337	-0.848454	0.398509	0.792944	0.00311284	0.384624	0.701453	0.849036	-0.0408967	-0.809222	0.420591	0.819582	-0.0621775	-0.613043	0.541444	0.768119	-0.00535789	-3.12148	0.00244117	0.022035
NVEC200_001199_1.1	4.74396	-0.0909042	-0.785552	0.434292	0.708921	-0.143316	-1.29254	0.199636	0.526674	-0.11711	-1.42989	0.156376	0.608764	0.00731836	0.58587	0.5595	0.753248	0.135459	1.74067	0.0853234	0.511917	-0.0524118	-0.334578	0.738759	0.884323	-0.00486343	-1.83329	0.0702248	0.216323
NVEC200_001200_1.1	5.42221	-0.149278	-2.33218	0.0219964	0.144072	0.078132	1.25014	0.214595	0.543944	-0.0355728	-0.785735	0.434153	0.811167	0.0146517	2.08083	0.0403845	0.151506	0.0264514	0.600505	0.549728	0.878621	0.22741	2.57367	0.0117521	0.0716316	-0.00336618	-2.2525	0.0268024	0.116248
NVEC200_001202_1.1	0.731634	0.922383	3.2253	0.00177236	0.0281881	0.287147	0.992155	0.323868	0.658448	0.604765	2.9904	0.00362113	0.216375	0.0268305	0.855569	0.394582	0.623841	-0.346012	-1.73104	0.0869836	0.516334	-0.635236	-1.55212	0.124258	0.347898	0.00297817	0.462679	0.644747	0.808005
NVEC200_001203_1.1	4.96235	0.372009	1.67731	0.0978008	0.336782	0.0647483	0.295482	0.768473	0.921942	0.218379	1.39237	0.168079	0.6194	-0.0525923	-2.13036	0.036546	0.142092	-0.154506	-1.00876	0.316453	0.751941	-0.307261	-0.991579	0.324711	0.595033	-0.00462192	-0.892881	0.374884	0.601506
NVEC200_001204_1.1	6.23002	-0.124059	-2.03455	0.044935	0.21987	0.235997	3.9589	0.000153274	0.0075816	0.0559689	1.29775	0.197797	0.645723	-0.00335796	-0.50139	0.61736	0.792341	0.0882022	2.10641	0.0380436	0.401029	0.360056	4.27208	4.92283e-05	0.00112284	0.000609448	0.428181	0.669575	0.821861
NVEC200_001205_1.1	1.80744	-0.0566775	-0.242372	0.809062	0.921768	0.341133	1.48832	0.140274	0.444822	0.142228	0.859969	0.392165	0.789339	0.00738094	0.286222	0.775387	0.88907	-0.0163592	-0.101177	0.919642	0.985279	0.39781	1.22751	0.222935	0.487025	0.0140864	2.64304	0.00974103	0.0581623
NVEC200_001206_1.1	1.9809	-0.316614	-1.35465	0.179031	0.463272	0.0519371	0.235017	0.814746	0.939105	-0.132338	-0.799491	0.426179	0.809097	0.00673181	0.270528	0.787393	0.894544	0.15313	0.992422	0.323739	0.75778	0.368551	1.18133	0.240684	0.508414	0.0115877	2.22468	0.0286855	0.121397
NVEC200_001207_1.1	2.42679	-0.153054	-0.815753	0.416865	0.694342	-0.0526723	-0.289701	0.772733	0.924033	-0.102863	-0.77495	0.440466	0.811272	-0.00358489	-0.173893	0.862353	0.937367	-0.0147897	-0.115718	0.908142	0.983219	0.100382	0.390605	0.697042	0.862724	0.0143483	3.31699	0.00132832	0.0138592
NVEC200_001208_1.1	1.46983	0.167965	0.689205	0.492525	0.749425	-0.454454	-1.87994	0.0634561	0.296222	-0.143245	-0.831207	0.408128	0.800059	0.0581203	2.11924	0.036914	0.142929	-0.165395	-0.946151	0.346687	0.773955	-0.622419	-1.82069	0.0720847	0.249848	0.00779819	1.344	0.182435	0.389859
NVEC200_001209_1.1	5.05623	-0.170955	-1.93146	0.0566758	0.250329	-0.0526226	-0.60365	0.547644	0.81102	-0.111789	-1.78594	0.0775871	0.499925	-0.01312	-1.33238	0.18621	0.400711	-0.0788168	-1.28635	0.201728	0.657923	0.118333	0.959964	0.339729	0.609994	0.00357577	1.71048	0.0907337	0.254701
NVEC200_001210_1.1	7.62075	0.0160487	0.393932	0.694593	0.867023	-0.082353	-2.04593	0.0437773	0.243282	-0.0331522	-1.15074	0.252986	0.694243	-0.0115545	-2.55876	0.0122306	0.0674878	-0.0229874	-0.810432	0.419899	0.819582	-0.0984017	-1.72874	0.0873955	0.27922	0.00466056	4.83035	5.78321e-06	0.000203721
NVEC200_001211_1.1	1.65876	0.480335	2.14156	0.0350192	0.189325	-0.10506	-0.479769	0.632594	0.858353	0.187638	1.18276	0.240122	0.68161	-0.0672198	-2.72385	0.00779483	0.0488179	0.00773755	0.0510215	0.959425	0.993696	-0.585395	-1.89086	0.0619651	0.226187	-0.000238991	-0.0466792	0.962876	0.982702
NVEC200_001212_1.1	3.57941	-0.0106444	-0.100331	0.920312	0.968443	-0.116834	-1.15588	0.250888	0.585168	-0.0637391	-0.848641	0.398405	0.792941	0.0100461	0.882055	0.380173	0.61136	0.138729	1.9548	0.0538118	0.446097	-0.10619	-0.743832	0.458979	0.714535	0.00586609	2.4451	0.0164933	0.0844168
NVEC200_001213_1.1	1.31766	-0.0259739	-0.105067	0.916564	0.966564	0.374895	1.59764	0.113742	0.402518	0.174461	0.996661	0.321688	0.745729	0.0362704	1.38813	0.168634	0.376874	0.177623	1.08773	0.279713	0.726447	0.400869	1.2098	0.229625	0.495343	-0.00236841	-0.44102	0.660291	0.816132
NVEC200_001214_1.1	7.06456	-0.0458788	-0.943736	0.347913	0.639349	-0.0278776	-0.582528	0.561715	0.819184	-0.0368782	-1.07268	0.286376	0.720423	-0.0164185	-3.05583	0.00297839	0.0247742	0.0267106	0.793041	0.429907	0.82428	0.0180012	0.266013	0.790858	0.909765	0.00341059	2.97357	0.00380612	0.0302668
NVEC200_001216_1.1	4.1163	-0.10398	-1.08837	0.279433	0.577467	0.136472	1.44858	0.151044	0.462347	0.0162461	0.240463	0.810536	0.961105	0.00174586	0.164268	0.8699	0.940891	-0.107545	-1.62228	0.108355	0.555048	0.240452	1.80491	0.0745426	0.25513	0.00346925	1.55172	0.124353	0.309036
NVEC200_001217_1.1	5.42792	0.249916	3.71483	0.000358235	0.00861867	-0.228985	-3.47904	0.000787795	0.0234624	0.0104656	0.219947	0.826427	0.964294	-0.0120478	-1.62777	0.107184	0.284236	-0.0464247	-1.00322	0.318534	0.754302	-0.478901	-5.14627	1.6228e-06	6.6062e-05	-0.00172907	-1.10263	0.273222	0.500818
NVEC200_001218_1.1	6.00181	-0.17526	-2.9433	0.00416097	0.0504985	0.151289	2.59687	0.0110413	0.115427	-0.0119855	-0.284589	0.776634	0.946802	0.0271058	4.13607	8.1119e-05	0.00160851	0.0337096	0.819557	0.414704	0.816644	0.326549	3.96446	0.00015028	0.00272499	0.000970662	0.69703	0.487639	0.696368
NVEC200_001219_1.1	4.68891	-0.0271937	-0.315235	0.753337	0.895778	0.0989101	1.19118	0.236816	0.57002	0.0358582	0.587426	0.558436	0.867865	0.0214296	2.29441	0.0241701	0.107194	0.109587	1.87485	0.0641625	0.468417	0.126104	1.07471	0.285469	0.555062	-0.000536892	-0.272905	0.785572	0.893401
NVEC200_001220_1.1	4.72936	-0.228441	-2.55922	0.0122154	0.0997186	0.162479	1.85954	0.0663243	0.302221	-0.032981	-0.522412	0.602708	0.884318	0.0430668	4.36704	3.45497e-05	0.000828223	-0.0214671	-0.346472	0.729823	0.933821	0.39092	3.16435	0.00214068	0.0211275	-0.000266467	-0.127851	0.898561	0.950599
NVEC200_001221_1.1	2.24589	0.424908	2.27403	0.0254204	0.157838	0.119439	0.668308	0.505703	0.791296	0.272173	2.05793	0.0425839	0.422651	-0.0269945	-1.35696	0.178298	0.389966	0.0561639	0.455681	0.649753	0.910534	-0.305469	-1.20992	0.229582	0.495343	0.000600796	0.147194	0.883318	0.944552
NVEC200_001222_1.1	1.97667	0.290352	1.45896	0.14817	0.418671	0.269546	1.35907	0.177631	0.495752	0.279949	1.98934	0.0497988	0.444609	-0.0269524	-1.21573	0.227369	0.452401	-0.231019	-1.68558	0.0954529	0.526797	-0.0208064	-0.0741812	0.941036	0.97778	0.000881564	0.193707	0.846856	0.923393
NVEC200_001223_1.1	1.206	0.0920095	0.332373	0.740405	0.889528	0.688531	2.43965	0.0167275	0.142613	0.39027	1.99339	0.0493455	0.442489	0.0290114	0.929532	0.35518	0.588093	-0.169287	-0.861708	0.391213	0.802278	0.596521	1.49484	0.138569	0.370662	-0.00691912	-1.07071	0.287254	0.515885
NVEC200_001224_1.1	4.52982	0.0593723	0.689025	0.492638	0.749472	0.0558648	0.672541	0.503018	0.789696	0.0576186	0.945008	0.347267	0.762164	0.00489275	0.523503	0.601953	0.781573	0.090559	1.55339	0.123953	0.572888	-0.00350756	-0.0298803	0.976231	0.990655	2.57256e-05	0.0130739	0.989599	0.995591
NVEC200_001225_1.1	2.987	-0.15674	-0.960499	0.339461	0.630698	0.167579	1.07172	0.286805	0.624619	0.00541996	0.0469281	0.962678	0.99351	-0.0154566	-0.877914	0.382404	0.613503	0.0264249	0.243314	0.808334	0.958011	0.324319	1.46808	0.145682	0.380985	-0.00366016	-0.994152	0.322901	0.552734
NVEC200_001226_1.1	4.41198	0.202101	1.60876	0.111334	0.361813	0.180912	1.49278	0.139155	0.443548	0.191507	2.15448	0.0339995	0.40205	0.0112438	0.827606	0.410185	0.638022	0.0584381	0.687401	0.49368	0.851803	-0.0211882	-0.123711	0.901833	0.962258	0.00410751	1.4466	0.151644	0.348274
NVEC200_001227_1.1	2.50609	-0.140061	-0.917262	0.361536	0.652676	-0.337066	-2.26623	0.0259136	0.179611	-0.238564	-2.20874	0.0298161	0.398606	-0.0283354	-1.67737	0.0970536	0.265978	-0.0699687	-0.673624	0.502332	0.855576	-0.197004	-0.936932	0.351382	0.622524	0.0011605	0.323804	0.746862	0.871638
NVEC200_001228_1.1	4.55487	0.0942552	0.974396	0.332556	0.624476	-0.0159667	-0.168788	0.866354	0.958988	0.0391442	0.572143	0.568698	0.872637	0.0123253	1.15647	0.250647	0.480384	-0.0561156	-0.84009	0.403156	0.809473	-0.110222	-0.824124	0.412119	0.677532	0.00471733	2.10163	0.0384716	0.146885
NVEC200_001229_1.1	4.46446	0.119203	1.26504	0.209229	0.501416	-0.0602463	-0.658301	0.51208	0.794972	0.0294783	0.442231	0.659417	0.903726	-0.00282108	-0.273564	0.785067	0.894119	-0.0118929	-0.185013	0.853649	0.969905	-0.179449	-1.38713	0.168939	0.413615	-0.00341774	-1.57185	0.119607	0.302749
NVEC200_001230_1.1	5.70025	-0.0723151	-1.07932	0.283424	0.581533	0.209849	3.18842	0.00198741	0.0436307	0.0687672	1.45127	0.150295	0.600549	0.00412657	0.557556	0.578577	0.765935	-0.023882	-0.515422	0.607563	0.898237	0.282164	3.03198	0.00319926	0.027875	0.00305745	1.95099	0.0542697	0.183951
NVEC200_001231_1.1	2.76312	-0.195295	-1.25703	0.212102	0.505571	0.128788	0.853331	0.395815	0.718253	-0.0332535	-0.302568	0.76294	0.940409	0.00743473	0.436375	0.663644	0.824315	0.00583225	0.0550487	0.956226	0.993059	0.324083	1.51907	0.132364	0.36131	0.00738098	2.06948	0.0414621	0.154653
NVEC200_001233_1.1	8.71396	0.0185822	0.336808	0.737071	0.88803	0.0384257	0.70331	0.483737	0.778314	0.0285039	0.730609	0.466977	0.82599	-0.00558807	-0.912743	0.363895	0.59701	-0.0395181	-1.02611	0.307678	0.746748	0.0198435	0.256833	0.797913	0.913536	0.00183659	1.40341	0.164046	0.366445
NVEC200_001234_1.1	4.91749	0.0269285	0.305857	0.760443	0.898672	0.0378561	0.447888	0.655346	0.867667	0.0323923	0.519877	0.604467	0.884653	-0.00839029	-0.883149	0.379585	0.610537	0.169231	2.86583	0.00521251	0.189034	0.0109276	0.0915031	0.927303	0.972813	0.000900447	0.449501	0.654186	0.813216
NVEC200_001235_1.1	4.57024	-0.00599636	-0.0677355	0.946151	0.979288	0.121679	1.42628	0.157358	0.470581	0.0578413	0.923388	0.358354	0.770662	-7.13849e-05	-0.00743525	0.994085	0.997492	0.0976603	1.63459	0.105742	0.549374	0.127675	1.05902	0.292517	0.562787	-0.00535399	-2.64527	0.00968181	0.057968
NVEC200_001236_1.1	3.28223	-0.188097	-0.940465	0.349771	0.641415	-0.23445	-1.24574	0.216444	0.545941	-0.211274	-1.49112	0.139807	0.590891	-0.00836751	-0.39494	0.693924	0.844579	0.196028	1.50088	0.137269	0.590495	-0.0463527	-0.174523	0.861889	0.944123	-0.00415281	-0.922293	0.359111	0.587402
NVEC200_001237_1.1	3.41448	0.020074	0.169767	0.865587	0.944757	0.0833756	0.728309	0.468377	0.769303	0.0517248	0.618307	0.537985	0.858848	-0.0193412	-1.4953	0.138448	0.334464	-0.0242338	-0.302796	0.762766	0.941988	0.0633016	0.391219	0.69659	0.862485	-0.00770648	-2.82756	0.00581741	0.0406737
NVEC200_001238_1.1	4.67442	0.00437143	0.0527122	0.958082	0.98417	0.0550534	0.67342	0.502462	0.789637	0.0297124	0.506637	0.613689	0.888237	0.00370978	0.40233	0.688426	0.841097	-0.0947451	-1.64149	0.104299	0.547267	0.050682	0.438416	0.662169	0.844034	0.0073822	3.79269	0.00027422	0.00419311
NVEC200_001239_1.1	2.31127	-0.157572	-0.708545	0.480497	0.740617	0.12205	0.580748	0.562909	0.819855	-0.0177608	-0.112764	0.910477	0.982927	-0.0144403	-0.609878	0.54353	0.742083	0.096222	0.665234	0.507657	0.858421	0.279622	0.942515	0.348534	0.619199	-0.00165777	-0.335267	0.738229	0.866773
NVEC200_001240_1.1	2.59286	-0.317365	-1.93122	0.056706	0.250329	0.0583378	0.359633	0.719992	0.903179	-0.129514	-1.11446	0.268144	0.706496	-0.0133742	-0.728418	0.46831	0.686269	-0.124027	-1.0947	0.276665	0.725407	0.375703	1.63786	0.105056	0.314474	0.00129517	0.333622	0.739466	0.867378
NVEC200_001241_1.1	2.71836	-0.203703	-1.59066	0.115306	0.367935	-0.0104549	-0.0828938	0.934126	0.981215	-0.107079	-1.18236	0.240278	0.681898	0.036471	2.55122	0.0124792	0.0683686	-0.10862	-1.20857	0.230098	0.688703	0.193248	1.08357	0.281546	0.551517	0.00312716	1.03829	0.302007	0.531093
NVEC200_001242_1.1	5.9033	-0.00587199	-0.101681	0.919244	0.967851	0.144641	2.56784	0.0119371	0.120094	0.0693847	1.69862	0.0929575	0.528149	0.00944533	1.49204	0.139298	0.335397	0.0704274	1.77641	0.0791541	0.501848	0.150513	1.89007	0.062072	0.226443	-0.00186017	-1.38596	0.169294	0.373864
NVEC200_001243_1.1	5.73302	-0.317626	-4.16869	7.20215e-05	0.0025688	0.239762	3.22392	0.00178003	0.0398609	-0.0389317	-0.722396	0.471985	0.8287	0.0255288	3.0507	0.00302467	0.0250069	0.0516963	0.987093	0.326329	0.759049	0.557388	5.30126	8.57938e-07	3.86355e-05	-0.00361926	-2.03605	0.0447808	0.162706
NVEC200_001245_1.1	4.45123	0.263126	3.04104	0.00311361	0.040421	-0.0484712	-0.575868	0.566188	0.821967	0.107327	1.75355	0.0830222	0.505962	0.00180972	0.191245	0.848778	0.93127	-0.0173659	-0.29337	0.769937	0.944205	-0.311597	-2.61874	0.0104069	0.0658477	-0.00264314	-1.3279	0.187676	0.396065
NVEC200_001246_1.1	3.99751	0.0170725	0.163088	0.870827	0.946953	-0.0216644	-0.21521	0.830106	0.945835	-0.00229597	-0.0309937	0.975345	0.9946	-0.0178132	-1.56975	0.120097	0.304742	0.0748433	1.06419	0.290182	0.733216	-0.0387369	-0.272324	0.786017	0.907731	-0.00109082	-0.45716	0.648694	0.809863
NVEC200_001247_1.1	5.69553	-0.133256	-1.41089	0.161917	0.43933	0.294042	3.2073	0.001888	0.0418217	0.0803928	1.20323	0.232222	0.678615	0.00291337	0.282999	0.777864	0.890311	0.12404	1.92984	0.0569544	0.454177	0.427297	3.29724	0.00142529	0.0155894	0.000490714	0.225221	0.822347	0.912585
NVEC200_001248_1.1	1.4968	0.171224	0.641574	0.522833	0.766192	0.283836	1.10848	0.270702	0.608842	0.22753	1.20466	0.231597	0.678595	0.0436368	1.51817	0.13259	0.32426	0.0836945	0.461113	0.645866	0.909643	0.112612	0.311271	0.756338	0.892963	0.00743171	1.25652	0.212285	0.427701
NVEC200_001249_1.1	6.0874	-0.00894692	-0.138197	0.890403	0.95629	0.0767687	1.20582	0.23115	0.563617	0.0339109	0.74066	0.46089	0.822092	-0.0213404	-2.97878	0.00374796	0.029016	-0.0337256	-0.75381	0.452995	0.833651	0.0857156	0.952152	0.343653	0.614258	-0.000638521	-0.419781	0.675679	0.826135
NVEC200_001250_1.1	2.57296	0.374835	1.99397	0.0492812	0.231771	-0.0253466	-0.143029	0.886598	0.965441	0.174744	1.31231	0.19286	0.639729	0.0159354	0.805887	0.422501	0.648711	0.128605	1.03578	0.30317	0.742843	-0.400182	-1.59994	0.113231	0.330447	-0.0182408	-4.37859	3.30837e-05	0.000833464
NVEC200_001251_1.1	3.02996	-0.466892	-1.34855	0.181674	0.466796	-0.114359	-0.353397	0.724815	0.905654	-0.290625	-1.18442	0.240112	0.68161	-0.0406142	-1.11731	0.267548	0.497614	0.223078	1.00671	0.317418	0.753194	0.352533	0.772365	0.442406	0.702687	0.0011538	0.149744	0.881382	0.943795
NVEC200_001252_1.1	6.47029	0.058283	0.618725	0.537877	0.775536	0.168495	1.8073	0.07452	0.322021	0.113389	1.70223	0.0926421	0.527532	-0.016384	-1.56499	0.12158	0.306857	-0.100089	-1.52473	0.131318	0.583049	0.110212	0.83595	0.405703	0.671926	0.0124379	5.58557	3.18298e-07	2.0926e-05
NVEC200_001253_1.1	4.89809	0.221515	1.78401	0.0782011	0.296193	0.264465	2.18406	0.0318767	0.202528	0.24299	2.7667	0.00702646	0.279209	-0.0233218	-1.71751	0.0897432	0.252329	0.0178025	0.210564	0.833761	0.965153	0.04295	0.250894	0.802538	0.914957	0.00905893	3.18847	0.00203988	0.019315
NVEC200_001254_1.1	-0.654575	0.607824	1.08425	0.281245	0.57915	0.723577	1.35417	0.179183	0.497754	0.665701	1.67743	0.0970415	0.530622	0.0461594	0.786488	0.433714	0.65823	0.201313	0.541986	0.589211	0.889832	0.115754	0.153377	0.878456	0.951183	0.0157224	1.32236	0.189506	0.398596
NVEC200_001256_1.1	5.50438	-0.134665	-1.93198	0.0566102	0.250257	-0.0692344	-1.01357	0.313594	0.649508	-0.10195	-2.06805	0.0415995	0.419544	0.0262854	3.41345	0.000975188	0.0109488	-0.0151359	-0.313139	0.754923	0.939185	0.0654303	0.677466	0.499904	0.741582	0.00245084	1.49696	0.138017	0.328834
NVEC200_001257_1.1	3.20078	0.0796108	0.656665	0.513126	0.761331	-0.0742877	-0.626497	0.532627	0.803745	0.00266154	0.0310394	0.975309	0.9946	0.0169475	1.26458	0.209393	0.429509	-0.0676612	-0.806105	0.422376	0.820834	-0.153898	-0.917979	0.361163	0.631329	0.000867302	0.307898	0.758895	0.87896
NVEC200_001258_1.1	5.80858	-0.15057	-2.01519	0.0469658	0.224718	-0.0131211	-0.179249	0.858158	0.956233	-0.0818456	-1.5488	0.125052	0.572922	0.0176048	2.13521	0.0355495	0.139364	-0.00953363	-0.184467	0.854075	0.970148	0.137449	1.32803	0.187635	0.439054	0.000865109	0.493197	0.623114	0.792936
NVEC200_001259_1.1	2.77989	0.147008	1.05493	0.294375	0.590761	-0.256127	-1.84883	0.0678725	0.305813	-0.0545596	-0.553679	0.581216	0.877205	-0.0192336	-1.22633	0.223378	0.447392	-0.210484	-2.1632	0.0332628	0.381271	-0.403136	-2.05771	0.0426052	0.176272	0.00530278	1.608	0.111452	0.288401
NVEC200_001260_1.1	5.79892	0.241329	3.38271	0.00107676	0.0198449	-0.384852	-5.52306	3.3962e-07	7.8779e-05	-0.0717617	-1.42214	0.158553	0.608994	-0.0140348	-1.79291	0.0764558	0.227849	0.00266181	0.0543603	0.956773	0.993277	-0.62618	-6.35619	9.16137e-09	8.045e-07	0.00757847	4.55113	1.71798e-05	0.000495794
NVEC200_001261_1.1	2.91002	0.184289	1.08932	0.279016	0.577089	-0.133167	-0.820011	0.414446	0.731632	0.0255608	0.213492	0.831442	0.96523	-0.0236611	-1.28994	0.200483	0.418532	0.0297544	0.262869	0.793272	0.950812	-0.317456	-1.38352	0.170037	0.41444	-0.00477061	-1.23513	0.2201	0.436859
NVEC200_001262_1.1	6.82533	0.26711	1.71236	0.091117	0.324599	-0.050487	-0.32785	0.743973	0.911094	0.108311	0.981877	0.329434	0.750184	-0.0169437	-0.98048	0.330118	0.564222	-0.0707393	-0.652255	0.516305	0.861823	-0.317597	-1.45845	0.149046	0.385613	-0.00236516	-0.643534	0.521914	0.722936
NVEC200_001263_1.1	2.61943	-0.0321938	-0.171021	0.864604	0.944757	-0.0303102	-0.165172	0.869191	0.96038	-0.031252	-0.234708	0.814986	0.962623	0.0233554	1.12406	0.264072	0.49414	-0.0217925	-0.167636	0.867258	0.972551	0.00188362	0.00726065	0.994223	0.997481	-0.00252581	-0.577023	0.565411	0.752943
NVEC200_001264_1.1	1.78235	0.104101	0.453807	0.651096	0.843742	0.0611665	0.279605	0.780443	0.92752	0.0826336	0.508861	0.612135	0.887403	-0.0260491	-1.05658	0.293621	0.526472	0.0915657	0.60437	0.547168	0.878046	-0.0429341	-0.13895	0.88981	0.956489	0.000375214	0.0733955	0.94166	0.972674
NVEC200_001266_1.1	3.86821	0.0684678	0.600609	0.549659	0.784388	0.0426753	0.385373	0.7009	0.891831	0.0555715	0.689113	0.492583	0.839774	0.0133033	1.06625	0.289255	0.52237	-0.0175385	-0.225253	0.82231	0.960977	-0.0257925	-0.164769	0.869507	0.947704	-0.00280216	-1.06962	0.287744	0.516578
NVEC200_001267_1.1	2.63251	0.146692	0.804496	0.423299	0.698717	-0.101062	-0.558277	0.578086	0.828707	0.0228154	0.176949	0.859959	0.971105	-0.029457	-1.43082	0.156058	0.358898	-0.164305	-1.2893	0.200705	0.657119	-0.247754	-0.96779	0.335827	0.606264	0.0181401	4.18748	6.72368e-05	0.00138664
NVEC200_001268_1.1	4.11236	-0.00129936	-0.0124076	0.990129	0.995205	0.0946562	0.930539	0.354662	0.687906	0.0466784	0.630096	0.53028	0.855249	0.017111	1.49272	0.139122	0.335169	0.0125141	0.174571	0.861821	0.971609	0.0959555	0.667322	0.506329	0.74508	-0.00129012	-0.535426	0.593719	0.773243
NVEC200_001270_1.1	2.95724	0.186322	1.43076	0.156074	0.430799	0.00615955	0.0487234	0.961251	0.9876	0.0962409	1.04468	0.299057	0.7305	0.0192564	1.35099	0.180194	0.392576	0.0145601	0.162617	0.871196	0.973858	-0.180163	-1.00819	0.316155	0.58517	0.00400406	1.34538	0.181991	0.389421
NVEC200_001271_1.1	5.91712	-0.0804308	-1.40727	0.162905	0.44092	0.034918	0.622299	0.535369	0.805905	-0.0227564	-0.562988	0.574889	0.875507	-0.0151407	-2.39595	0.0187165	0.0902001	-0.0133606	-0.338802	0.735574	0.935785	0.115349	1.45387	0.149574	0.38615	0.000523707	0.389966	0.697513	0.839735
NVEC200_001272_1.1	2.02436	-0.272796	-1.31427	0.192205	0.481943	-0.132127	-0.642163	0.522453	0.799135	-0.202461	-1.37939	0.171305	0.623323	0.00998078	0.427995	0.66971	0.829219	-0.157636	-1.08688	0.280085	0.726447	0.140669	0.483454	0.629986	0.825531	0.00469865	0.950374	0.34455	0.572264
NVEC200_001275_1.1	6.31144	-0.0592131	-0.922442	0.358844	0.649591	-0.128693	-2.04098	0.0442771	0.244777	-0.0939531	-2.06956	0.0414541	0.419455	0.0242403	3.41659	0.000965312	0.0108877	-0.0115659	-0.259429	0.795916	0.951886	-0.0694799	-0.779293	0.437918	0.699785	0.00029899	0.197705	0.843736	0.922478
NVEC200_001276_1.1	2.19795	-0.0575179	-0.283428	0.777521	0.906718	-0.284227	-1.42855	0.156706	0.469545	-0.170872	-1.19053	0.237069	0.680645	-0.00167167	-0.0741352	0.941073	0.972967	-0.140971	-1.00666	0.316885	0.752517	-0.226709	-0.805886	0.422502	0.687398	0.00117469	0.246057	0.806216	0.904287
NVEC200_001277_1.1	4.41647	-0.0301102	-0.311634	0.756063	0.896312	-0.16568	-1.78773	0.0772947	0.328696	-0.0978953	-1.43162	0.155827	0.608698	-0.00809146	-0.773796	0.441145	0.663576	0.110165	1.70024	0.0926511	0.522546	-0.13557	-1.03536	0.303364	0.573224	-0.00720121	-3.24237	0.00168038	0.0166871
NVEC200_001278_1.1	5.71081	-0.218904	-3.16911	0.00210948	0.0317429	0.0488344	0.725264	0.470233	0.770828	-0.085035	-1.74042	0.0853141	0.512385	0.00802225	1.05838	0.292804	0.525725	0.0620011	1.30884	0.19403	0.653294	0.267739	2.81265	0.00607019	0.0443416	0.00371487	2.30397	0.0236028	0.106956
NVEC200_001279_1.1	5.97963	-0.0842707	-1.29662	0.198185	0.48875	-0.00405438	-0.0636025	0.949432	0.986265	-0.0441625	-0.960777	0.339322	0.758336	-0.0171284	-2.38685	0.0191559	0.0915285	-0.0014593	-0.0325765	0.974087	0.997253	0.0802163	0.889983	0.375925	0.644921	0.007988	5.23044	1.14924e-06	5.74339e-05
NVEC200_001280_1.1	3.95928	0.0774084	0.839459	0.403508	0.684427	-0.0641788	-0.706668	0.481658	0.777806	0.00661482	0.101436	0.919437	0.985067	-0.0143834	-1.40079	0.164827	0.371778	-0.111009	-1.74004	0.0853808	0.511917	-0.141587	-1.10252	0.273272	0.542887	-0.00898129	-4.13352	8.18724e-05	0.00162607
NVEC200_001281_1.1	5.30105	0.0177073	0.246311	0.80602	0.921102	0.108326	1.52439	0.131031	0.431527	0.0630167	1.23958	0.218458	0.662175	-0.000570146	-0.0712583	0.943355	0.973525	-0.10233	-2.04232	0.0441416	0.425358	0.0906188	0.901773	0.369662	0.638201	0.00338173	1.9998	0.0486354	0.171867
NVEC200_001282_1.1	5.87294	0.104554	1.39467	0.166658	0.446498	-0.100953	-1.36645	0.175313	0.492113	0.00180058	0.0339635	0.972984	0.9946	-0.00225176	-0.270973	0.787052	0.894537	-0.0614133	-1.1782	0.241924	0.699903	-0.205507	-1.96713	0.0523485	0.202064	0.00835765	4.73337	8.47335e-06	0.00027779
NVEC200_001283_1.1	3.87472	-0.20563	-1.90716	0.0597928	0.256577	0.118486	1.15113	0.252828	0.587906	-0.0435723	-0.570897	0.569538	0.873273	0.0210029	1.81314	0.0732528	0.22187	0.129814	1.79914	0.0754578	0.493657	0.324116	2.22925	0.0283684	0.133382	-0.00617662	-2.53127	0.013159	0.0723508
NVEC200_001284_1.1	0.253331	0.906608	1.43741	0.154662	0.428334	1.06762	1.77597	0.079698	0.334177	0.987113	2.21076	0.0300282	0.398606	0.0498041	0.775431	0.440466	0.663146	0.270522	0.666595	0.507029	0.858406	0.16101	0.189632	0.850098	0.939171	0.010203	0.796979	0.42792	0.647302
NVEC200_001285_1.1	3.07542	-0.0671724	-0.49521	0.621698	0.827244	0.0540517	0.405191	0.68633	0.884913	-0.00656033	-0.0683877	0.945634	0.990727	-0.0151724	-1.00486	0.317747	0.550506	-0.0915342	-0.977824	0.330867	0.762453	0.121224	0.642668	0.522126	0.755623	0.00211116	0.665986	0.507179	0.711138
NVEC200_001288_1.1	4.05276	-0.111691	-1.09744	0.275472	0.574034	-0.0987428	-0.986573	0.326582	0.661124	-0.105217	-1.46185	0.147379	0.597754	0.0103319	0.912894	0.363816	0.597004	-0.084803	-1.19881	0.23385	0.692315	0.012948	0.0914898	0.927313	0.972813	-9.70866e-05	-0.040523	0.967769	0.985076
NVEC200_001289_1.1	4.8882	-0.0961924	-1.16816	0.245927	0.542145	0.085762	1.06098	0.291629	0.630145	-0.0052152	-0.0895515	0.928849	0.987529	0.0201609	2.21151	0.029617	0.122928	-0.0541657	-0.948422	0.345537	0.772931	0.181954	1.59198	0.115009	0.333079	0.000661204	0.343061	0.732378	0.863017
NVEC200_001290_1.1	5.91384	0.0408925	0.585302	0.559857	0.790319	-0.00646986	-0.0951372	0.924424	0.9776	0.0172113	0.348263	0.728483	0.926004	-0.0132885	-1.7381	0.0857238	0.24567	0.076398	1.60053	0.1131	0.55965	-0.0473623	-0.492653	0.623497	0.82166	0.000550694	0.339425	0.735106	0.86474
NVEC200_001291_1.1	2.82849	-0.755874	-1.345	0.182835	0.468189	-0.879225	-1.60611	0.112615	0.399885	-0.81755	-2.05661	0.0433381	0.426002	-0.020651	-0.338749	0.735782	0.867028	0.0779899	0.208565	0.835375	0.965771	-0.12335	-0.159389	0.873808	0.949473	0.0226861	1.6948	0.0944213	0.260156
NVEC200_001292_1.1	2.43272	-0.0409282	-0.291425	0.771418	0.903996	-0.0520001	-0.377435	0.706768	0.895774	-0.0464641	-0.467797	0.641097	0.89751	0.039375	2.52203	0.0134849	0.0726166	-0.0744362	-0.75792	0.450543	0.831862	-0.0110719	-0.0568366	0.954805	0.983728	-0.00155745	-0.474114	0.636604	0.802954
NVEC200_001293_1.1	2.39507	0.0415186	0.206424	0.836941	0.933868	0.0346174	0.186233	0.852695	0.954044	0.038068	0.266829	0.790231	0.951821	0.00863704	0.416576	0.678013	0.835613	0.295084	2.29224	0.0243004	0.339122	-0.00690116	-0.0263493	0.979039	0.991674	-0.00230117	-0.532191	0.595948	0.774398
NVEC200_001294_1.1	2.9494	0.074732	0.50045	0.618019	0.825715	0.113702	0.799432	0.426213	0.741044	0.094217	0.891214	0.375268	0.778067	0.0035169	0.220292	0.826159	0.918488	0.133771	1.3505	0.180351	0.643707	0.03897	0.193999	0.846628	0.937594	-0.00871641	-2.60892	0.0106876	0.0624495
NVEC200_001295_1.1	3.3879	-0.210514	-1.71856	0.0892447	0.320062	-0.263088	-2.23222	0.028164	0.189	-0.236801	-2.73186	0.0076227	0.281422	0.050928	3.81433	0.000254442	0.00393473	0.0474642	0.565268	0.573343	0.884625	-0.0525741	-0.315676	0.753003	0.891382	0.00451985	1.59447	0.114451	0.294178
NVEC200_001296_1.1	4.25415	-0.0870938	-0.900691	0.370235	0.66014	0.215837	2.30301	0.0236592	0.171126	0.0643716	0.940991	0.34931	0.763859	0.0383446	3.62989	0.000477612	0.0063685	0.0635952	0.957558	0.340934	0.76931	0.302931	2.28678	0.0246316	0.121177	0.00273115	1.23131	0.221518	0.438541
NVEC200_001297_1.1	4.3539	-0.0377312	-0.354951	0.723484	0.882682	0.194342	1.87795	0.0637319	0.296802	0.0783055	1.0414	0.300568	0.731285	0.0100533	0.862697	0.390672	0.620292	0.00925788	0.127152	0.899113	0.980633	0.232073	1.58632	0.116287	0.335192	0.00284578	1.16218	0.248336	0.471344
NVEC200_001298_1.1	5.53822	0.190588	1.67691	0.0975721	0.336386	0.110924	0.987967	0.32623	0.660659	0.150756	1.87573	0.0644418	0.470988	-0.00575889	-0.456388	0.649382	0.814497	-0.0968169	-1.2245	0.224456	0.682052	-0.0796649	-0.501769	0.617246	0.81763	-0.000136279	-0.0511601	0.959329	0.980937
NVEC200_001299_1.1	5.67631	0.08909	0.634365	0.527815	0.769539	-0.000938554	-0.00680274	0.994591	0.997349	0.0440757	0.443768	0.658516	0.903705	-0.0184739	-1.18962	0.238031	0.465832	-0.0477195	-0.492249	0.624013	0.903894	-0.0900286	-0.461489	0.645813	0.83417	0.00130302	0.396076	0.693198	0.837643
NVEC200_001300_1.1	4.23171	0.164471	1.44477	0.152107	0.424239	-0.16894	-1.50863	0.135011	0.438104	-0.00223447	-0.0277549	0.977921	0.995298	-0.0213771	-1.6906	0.0944857	0.261153	-0.0919644	-1.1699	0.24523	0.703243	-0.333412	-2.10559	0.0381162	0.163048	0.000946357	0.355061	0.723402	0.856709
NVEC200_001301_1.1	6.31979	0.188544	3.13927	0.00231199	0.0333219	-0.252954	-4.29669	4.49318e-05	0.0032958	-0.0322049	-0.75817	0.450394	0.814441	0.00631486	0.954954	0.342242	0.576057	0.00942892	0.227103	0.820875	0.960874	-0.441497	-5.30391	8.48576e-07	3.83544e-05	0.0011249	0.799063	0.426426	0.646342
NVEC200_001302_1.1	2.44068	0.17542	1.0722	0.286589	0.584591	0.102569	0.638055	0.525111	0.800064	0.138995	1.20127	0.232899	0.678662	-0.00152004	-0.0839077	0.933322	0.969407	-0.0915328	-0.812554	0.418687	0.819142	-0.0728515	-0.320506	0.749352	0.889695	0.00609332	1.62055	0.108727	0.284041
NVEC200_001303_1.1	3.09815	0.283134	1.95316	0.0540086	0.243517	0.0105161	0.0755155	0.939978	0.983132	0.146825	1.43123	0.155939	0.608735	-0.0296286	-1.8901	0.0620673	0.200751	0.0594337	0.613674	0.541029	0.874901	-0.272618	-1.38548	0.16944	0.413982	-0.00129472	-0.396727	0.692539	0.837175
NVEC200_001304_1.1	2.80381	-0.214666	-1.39161	0.167581	0.447308	0.105975	0.701863	0.484634	0.779226	-0.0543458	-0.498122	0.619652	0.890682	0.000309538	0.0181296	0.985577	0.994142	-0.089582	-0.845844	0.399956	0.806758	0.320641	1.50196	0.136722	0.367963	-0.00283878	-0.788027	0.432819	0.651103
NVEC200_001305_1.1	5.45723	-0.259093	-2.80942	0.00612619	0.0648711	-0.0427172	-0.474143	0.636584	0.859771	-0.150905	-2.31346	0.0230512	0.371905	0.0116306	1.14513	0.25529	0.485541	-0.0082707	-0.130256	0.896664	0.979985	0.216376	1.69873	0.0929363	0.290137	0.00329822	1.52493	0.130897	0.3186
NVEC200_001306_1.1	4.44708	-0.0702158	-0.724859	0.47048	0.732862	-0.0164213	-0.175436	0.861144	0.957439	-0.0433185	-0.632051	0.529008	0.855249	-0.00689935	-0.653344	0.515254	0.722624	0.0511693	0.780198	0.437388	0.825707	0.0537945	0.406638	0.68527	0.856344	0.00182598	0.81825	0.415446	0.636844
NVEC200_001307_1.1	5.03283	-0.115461	-1.48401	0.141414	0.407867	0.127874	1.68363	0.0958307	0.366258	0.00620674	0.112786	0.91046	0.982927	-0.00413589	-0.483459	0.629982	0.800599	-0.00416279	-0.0780686	0.937952	0.989153	0.243335	2.26614	0.0259192	0.12575	0.00630868	3.48991	0.000760251	0.00914533
NVEC200_001308_1.1	4.68558	0.142536	1.57892	0.117976	0.373192	-0.374817	-4.19735	6.48482e-05	0.00423756	-0.11614	-1.81931	0.0722977	0.487563	-0.0111273	-1.10441	0.272454	0.50286	-0.160212	-2.54813	0.0125822	0.265366	-0.517353	-4.09689	9.35065e-05	0.00185116	-0.000762616	-0.35604	0.722671	0.856174
NVEC200_001309_1.1	3.22198	-0.0241715	-0.178682	0.858602	0.943045	-0.0896364	-0.700461	0.485505	0.779694	-0.0569039	-0.593969	0.554071	0.865552	0.0261618	1.81665	0.0727079	0.220923	0.152928	1.70025	0.0926502	0.522546	-0.065465	-0.362365	0.717956	0.872534	0.000703235	0.232729	0.816517	0.909428
NVEC200_001310_1.1	4.90575	0.0336872	0.336607	0.737222	0.88803	-0.281319	-2.85346	0.00540144	0.0784006	-0.123816	-1.74945	0.0837337	0.507105	-0.00143296	-0.128724	0.897872	0.954478	-0.112152	-1.61237	0.110496	0.556613	-0.315006	-2.25957	0.0263409	0.127244	-0.00436366	-1.842	0.0688754	0.21345
NVEC200_001311_1.1	4.94188	-0.0691755	-0.807613	0.421512	0.697235	0.105368	1.26094	0.210696	0.539066	0.0180961	0.298688	0.765889	0.941773	-0.00319512	-0.339283	0.735212	0.866679	-0.000510811	-0.00870924	0.993071	0.999586	0.174543	1.47745	0.143158	0.377559	-0.00197154	-0.990768	0.324541	0.554154
NVEC200_001312_1.1	1.57096	0.320239	1.24358	0.216987	0.510204	0.11863	0.498465	0.619412	0.852492	0.219435	1.20133	0.232877	0.678662	-0.015093	-0.572184	0.56867	0.758059	0.328278	2.01113	0.0474012	0.432628	-0.201609	-0.601221	0.549253	0.773573	0.00234694	0.432914	0.666146	0.81937
NVEC200_001313_1.1	5.36776	0.0853387	0.991365	0.324252	0.617018	0.187421	2.214	0.0294386	0.193746	0.13638	2.24022	0.0276194	0.39074	0.00312418	0.328319	0.743458	0.871097	-0.0460278	-0.772201	0.442084	0.828013	0.102082	0.85282	0.396096	0.664495	0.00189161	0.942349	0.348619	0.576529
NVEC200_001314_1.1	2.67634	-0.256089	-1.48094	0.142228	0.40921	0.147071	0.865061	0.38938	0.713885	-0.0545091	-0.445726	0.6569	0.903254	0.0394046	2.0489	0.0434795	0.159183	-0.0337638	-0.279517	0.78051	0.946328	0.40316	1.67705	0.0971146	0.298482	-0.00291358	-0.720503	0.473143	0.6853
NVEC200_001315_1.1	6.03678	-0.0680433	-1.17397	0.243604	0.539811	-0.113083	-1.9833	0.0504817	0.263278	-0.0905633	-2.20944	0.0297658	0.398606	0.014399	2.24289	0.0274403	0.11656	-0.0433641	-1.07647	0.284686	0.730994	-0.0450401	-0.558643	0.577838	0.791437	0.00214094	1.5658	0.121019	0.304942
NVEC200_001316_1.1	2.86969	0.334294	2.42971	0.0171626	0.123102	-0.00942011	-0.071906	0.942841	0.984034	0.162437	1.66764	0.0989759	0.531368	0.000150468	0.01026	0.991837	0.996535	0.0973589	1.06417	0.290191	0.733216	-0.343714	-1.85767	0.0665916	0.236749	-0.00609797	-1.99297	0.0493928	0.173051
NVEC200_001317_1.1	7.8862	0.0749555	1.73481	0.0863092	0.31421	-0.135483	-3.17159	0.00209343	0.0450459	-0.0302636	-0.990502	0.32467	0.747751	-0.00562406	-1.17398	0.243602	0.472373	-0.0311134	-1.03306	0.304434	0.744185	-0.210438	-3.48363	0.000776053	0.00970925	0.000873524	0.853228	0.395872	0.619901
NVEC200_001321_1.1	6.87203	0.0930966	1.75588	0.0826218	0.30595	-0.0601272	-1.1506	0.253045	0.588191	0.0164847	0.439654	0.661276	0.904004	-0.019933	-3.39713	0.00102792	0.0114261	-0.0245585	-0.667699	0.506089	0.858066	-0.153224	-2.07353	0.0410747	0.172169	0.00422447	3.37781	0.00109386	0.0120117
NVEC200_001322_1.1	5.91772	0.0689011	1.16794	0.246014	0.542145	-0.0561275	-0.965527	0.336952	0.670848	0.0063868	0.15309	0.878681	0.97705	0.00155799	0.23809	0.81237	0.909754	-0.0787012	-1.91986	0.0581468	0.457362	-0.125029	-1.52101	0.131877	0.360529	-0.00420799	-3.02681	0.00324912	0.0269043
NVEC200_001323_1.1	3.13906	0.0787217	0.317314	0.75188	0.895203	0.438255	1.8568	0.0672351	0.304789	0.258488	1.47167	0.145261	0.595909	0.0504817	1.91762	0.058937	0.194516	0.188269	1.13626	0.259439	0.713384	0.359533	1.0786	0.284194	0.553961	0.00659435	1.21758	0.227171	0.445501
NVEC200_001324_1.1	6.63047	-0.207472	-2.79078	0.00645899	0.0670513	0.190865	2.61726	0.0104488	0.113109	-0.0083037	-0.157932	0.874875	0.975469	0.0493372	6.01741	4.0723e-08	3.27221e-06	0.0674643	1.30767	0.194423	0.653294	0.398337	3.86314	0.000214697	0.0036558	-0.00248801	-1.42475	0.1578	0.357082
NVEC200_001325_1.1	5.76822	0.0859987	1.55059	0.124624	0.382649	-0.0748482	-1.37929	0.171334	0.488062	0.00557522	0.142128	0.887307	0.978389	0.011467	1.87867	0.063632	0.203881	0.00264599	0.0691169	0.945055	0.990136	-0.160847	-2.09643	0.0389427	0.165719	0.000584823	0.451442	0.652792	0.812701
NVEC200_001326_1.1	5.08572	-0.120803	-1.75327	0.0830716	0.30706	0.0588577	0.874151	0.384438	0.710289	-0.0309725	-0.635547	0.526737	0.854106	0.027929	3.67841	0.000405458	0.00558823	0.013552	0.284647	0.77659	0.945474	0.179661	1.8873	0.0624476	0.227341	-0.00115387	-0.717631	0.474904	0.686959
NVEC200_001327_1.1	1.52882	0.381907	1.85833	0.0664971	0.270253	-0.478685	-2.35065	0.0209975	0.161198	-0.0483889	-0.332972	0.739955	0.930034	0.0054372	0.23812	0.812347	0.909754	-0.190395	-1.33104	0.186648	0.650181	-0.860592	-2.9884	0.00364269	0.0306273	0.00261673	0.540989	0.589895	0.77036
NVEC200_001328_1.1	3.72452	-0.288089	-2.61388	0.0105449	0.0917228	0.078388	0.710776	0.47912	0.776675	-0.10485	-1.34538	0.181992	0.631031	0.0249945	2.0055	0.0480117	0.169712	-0.192456	-2.4615	0.0158059	0.292789	0.366477	2.34971	0.0210471	0.108629	-0.000980922	-0.371985	0.710807	0.848482
NVEC200_001329_1.1	3.79361	-0.389117	-3.17805	0.00205213	0.0311248	0.368336	3.04696	0.00305884	0.0556293	-0.0103904	-0.120004	0.904756	0.981546	0.0307501	2.26447	0.0260258	0.112663	-0.065797	-0.775402	0.4402	0.826916	0.757454	4.43097	2.71545e-05	0.000705788	-0.00584502	-2.04328	0.0440446	0.16101
NVEC200_001330_1.1	7.63668	-0.0407755	-0.554441	0.580739	0.803899	-0.099125	-1.365	0.175868	0.49233	-0.0699503	-1.34501	0.182213	0.631031	0.00172213	0.211346	0.833125	0.922381	-0.00430963	-0.0841668	0.933122	0.989	-0.0583495	-0.56821	0.571396	0.788895	-0.000768243	-0.441104	0.660262	0.816132
NVEC200_001331_1.1	5.66475	0.156703	1.97438	0.0515048	0.237065	-0.146216	-1.88335	0.0629873	0.295109	0.00524332	0.0934046	0.925797	0.986714	0.00647631	0.741699	0.460264	0.680257	-0.0110419	-0.201747	0.840585	0.9676	-0.302919	-2.75968	0.00705138	0.0496789	-0.000178332	-0.096247	0.923545	0.96396
NVEC200_001332_1.1	3.46341	-0.0339802	-0.251887	0.801722	0.919152	-0.163572	-1.28211	0.203203	0.531082	-0.098776	-1.03387	0.304056	0.734711	-0.00498224	-0.346857	0.729534	0.864192	0.144511	1.62671	0.107408	0.55204	-0.129591	-0.719515	0.473749	0.724234	0.00533671	1.76325	0.0813633	0.23754
NVEC200_001333_1.1	4.38428	-0.0905296	-0.975715	0.331906	0.623922	0.0413919	0.460584	0.646244	0.864801	-0.0245689	-0.374293	0.709096	0.921568	0.0112826	1.11323	0.268672	0.498777	0.0678714	1.07342	0.286043	0.731784	0.131922	1.03856	0.301883	0.57207	0.00189642	0.886493	0.377791	0.603454
NVEC200_001334_1.1	8.42096	-0.165406	-3.74511	0.000323008	0.00800617	-0.0612362	-1.39959	0.165184	0.480087	-0.113321	-3.62843	0.000479958	0.111332	0.00734118	1.49642	0.138156	0.333887	-0.0613547	-1.98792	0.0499592	0.437464	0.10417	1.68361	0.0958348	0.295834	-0.000101076	-0.0962886	0.923512	0.96396
NVEC200_001335_1.1	1.61132	0.108058	0.607339	0.545205	0.78066	-0.200998	-1.13551	0.259275	0.596284	-0.0464699	-0.369365	0.712752	0.922468	0.0352857	1.76166	0.0816329	0.237975	-0.216373	-1.71077	0.090681	0.521466	-0.309055	-1.2346	0.220297	0.484062	0.00569097	1.34877	0.180905	0.388044
NVEC200_001336_1.1	2.1334	-0.448864	-2.33564	0.0218059	0.143589	0.0266353	0.143632	0.886123	0.965437	-0.211114	-1.55256	0.124153	0.572622	0.0808679	3.83762	0.000234671	0.00372585	0.0664437	0.498035	0.619714	0.902483	0.475499	1.81436	0.073062	0.251953	-4.98178e-05	-0.0112134	0.991079	0.995937
NVEC200_001337_1.1	4.88652	0.222921	2.35658	0.0206854	0.138587	-0.0059054	-0.0635413	0.949481	0.986265	0.108508	1.62196	0.108424	0.546859	-0.0211278	-2.01919	0.0465404	0.166136	-0.0768077	-1.17745	0.242222	0.700182	-0.228827	-1.74128	0.0851621	0.275041	0.00285216	1.29538	0.198609	0.410231
NVEC200_001338_1.1	3.65813	0.203156	1.65958	0.100592	0.342002	-0.203524	-1.69839	0.0930015	0.361549	-0.00018402	-0.00212545	0.998309	0.999562	-0.0264417	-1.95358	0.0539577	0.183349	-0.0775342	-0.923187	0.358458	0.78202	-0.406679	-2.40028	0.0185102	0.0992431	0.00566215	1.98964	0.0497649	0.173728
NVEC200_001339_1.1	1.75401	-0.259176	-1.10298	0.273073	0.572016	-0.0298721	-0.135591	0.892457	0.967407	-0.144524	-0.868002	0.387777	0.786428	-0.0349313	-1.40427	0.163792	0.37009	0.20014	1.32739	0.187845	0.650212	0.229304	0.737729	0.462661	0.717904	0.00760348	1.46528	0.146442	0.340519
NVEC200_001340_1.1	6.04587	-0.0724269	-1.35893	0.177675	0.461707	0.111305	2.12016	0.0368341	0.221208	0.0194389	0.515744	0.607339	0.885632	-0.00468609	-0.793243	0.42979	0.655379	-0.0423984	-1.14713	0.254466	0.708853	0.183732	2.475	0.0152589	0.0866083	-0.00133093	-1.06055	0.291826	0.520864
NVEC200_001342_1.1	0.961499	-0.0982858	-0.317849	0.75136	0.895203	-0.444971	-1.51226	0.134084	0.436324	-0.271628	-1.24075	0.218029	0.662166	-0.0138635	-0.417641	0.677237	0.834932	0.0677137	0.330984	0.741451	0.937375	-0.346685	-0.834277	0.406406	0.672371	-0.0035538	-0.5017	0.617143	0.78885
NVEC200_001343_1.1	4.04656	0.0414352	0.390913	0.696815	0.868212	0.0959717	0.920639	0.35978	0.691537	0.0687034	0.916523	0.361921	0.773878	0.0648409	5.49218	3.86768e-07	2.2749e-05	-0.0727695	-0.973989	0.332757	0.764175	0.0545364	0.369982	0.712293	0.869606	-0.00834377	-3.35581	0.00117378	0.0126759
NVEC200_001344_1.1	8.65985	0.367321	2.62267	0.0106334	0.092256	-0.26697	-1.92712	0.0578956	0.282	0.0501754	0.506616	0.613966	0.888326	-0.00666981	-0.429844	0.668588	0.828591	-0.0227826	-0.233386	0.816121	0.960869	-0.63429	-3.23777	0.00182018	0.018852	-0.00745202	-2.24647	0.0277296	0.118742
NVEC200_001346_1.1	1.9513	0.196061	0.796995	0.427619	0.703467	0.350751	1.42359	0.158134	0.471869	0.273406	1.57176	0.119629	0.567867	-0.0466134	-1.68055	0.0964308	0.26498	-0.230212	-1.35244	0.179732	0.643346	0.15469	0.44395	0.658179	0.841565	0.00405308	0.711451	0.478704	0.68986
NVEC200_001349_1.1	3.79223	0.117795	1.10882	0.270557	0.569559	-0.115792	-1.12051	0.265576	0.601619	0.0010011	0.0133219	0.989401	0.996806	0.00132086	0.113254	0.91009	0.959986	-0.0495513	-0.682052	0.497015	0.853801	-0.233587	-1.59898	0.113443	0.330648	-0.00198921	-0.809482	0.420442	0.640987
NVEC200_001350_1.1	6.61402	-0.10348	-1.80536	0.0744715	0.288393	-0.0585649	-1.0332	0.30437	0.641644	-0.0810223	-1.99894	0.04873	0.441452	-0.00592913	-0.930281	0.354795	0.58785	-0.0884472	-2.21263	0.0295368	0.367536	0.0449147	0.560334	0.576689	0.790967	0.00755512	5.5537	2.98419e-07	2.00479e-05
NVEC200_001352_1.1	6.52259	-0.0862926	-1.17694	0.242422	0.538646	0.114079	1.58154	0.117377	0.408908	0.0138931	0.267941	0.789378	0.951619	0.0122394	1.50979	0.134714	0.32815	0.0010971	0.0215609	0.982847	0.998307	0.200371	1.96451	0.0526563	0.202806	-0.000389184	-0.225476	0.822137	0.912463
NVEC200_001353_1.1	4.32827	-0.0904523	-0.835694	0.405612	0.686386	0.183804	1.71695	0.0895406	0.353845	0.0466758	0.60983	0.543561	0.861206	-0.0227694	-1.884	0.0628985	0.202587	-0.103641	-1.38418	0.169837	0.630047	0.274256	1.81163	0.0734871	0.252855	0.00318925	1.25605	0.212455	0.427841
NVEC200_001354_1.1	2.4885	-0.0152417	-0.0803578	0.936137	0.975159	0.110156	0.62284	0.535016	0.805574	0.0474572	0.352975	0.724959	0.925613	-0.0426777	-2.14772	0.0345112	0.136513	0.190688	1.57642	0.118551	0.566004	0.125398	0.502778	0.616388	0.817286	-0.00138325	-0.336074	0.737623	0.866701
NVEC200_001355_1.1	1.63178	-0.0443396	-0.162315	0.871433	0.947072	0.542993	2.02836	0.0455765	0.249	0.249327	1.29051	0.200285	0.647463	-0.0264151	-0.879717	0.381432	0.612183	-0.00170878	-0.00921634	0.992668	0.999586	0.587333	1.55171	0.124354	0.34809	0.0142501	2.31721	0.0228363	0.104697
NVEC200_001357_1.1	1.27224	0.128193	0.458613	0.647654	0.84132	0.153287	0.575491	0.566442	0.821967	0.14074	0.711227	0.478842	0.832517	-0.0178764	-0.597167	0.551944	0.747945	0.117156	0.635162	0.526987	0.868676	0.0250943	0.0667039	0.94697	0.980796	-0.00814794	-1.30537	0.195202	0.405717
NVEC200_001358_1.1	5.7546	-0.0777901	-0.808036	0.421388	0.697235	0.367978	3.86102	0.000223196	0.00979988	0.145094	2.13132	0.0360308	0.407565	0.00137647	0.128584	0.897999	0.954478	-0.0776814	-1.15825	0.250097	0.707011	0.445768	3.30748	0.0013947	0.0153367	0.00465267	2.05545	0.0429901	0.15824
NVEC200_001361_1.1	3.86576	0.0745562	0.724982	0.470405	0.732862	-0.0875681	-0.896671	0.372364	0.701085	-0.00650593	-0.0893483	0.92901	0.987529	-0.0141901	-1.29219	0.199708	0.417481	0.131061	1.92781	0.0571347	0.454177	-0.162124	-1.17562	0.242948	0.510971	-0.00265837	-1.15143	0.252703	0.476376
NVEC200_001362_1.1	3.61928	-0.0385607	-0.33427	0.738979	0.88879	-0.117486	-1.05414	0.294734	0.633029	-0.0780233	-0.955945	0.341744	0.759187	-0.033245	-2.63368	0.00999271	0.0581745	0.0438967	0.564241	0.574039	0.884798	-0.0789251	-0.501058	0.617593	0.817826	0.00830773	3.12686	0.0024014	0.0217719
NVEC200_001363_1.1	3.59655	-0.0266188	-0.216514	0.829093	0.930342	-0.0205935	-0.173187	0.862906	0.958158	-0.0236062	-0.271391	0.786732	0.950756	-0.00623219	-0.464446	0.643486	0.81032	0.0187629	0.225262	0.822303	0.960977	0.00602534	0.0358519	0.971482	0.988611	0.00126661	0.449597	0.654117	0.813216
NVEC200_001364_1.1	4.78819	0.153299	1.81001	0.0737407	0.286696	-0.0578765	-0.701346	0.484956	0.779352	0.0477112	0.796398	0.427965	0.809097	0.00405195	0.436256	0.66373	0.824315	-0.014514	-0.24969	0.803414	0.955301	-0.211176	-1.81014	0.0737197	0.253206	0.00185528	0.947174	0.346169	0.574332
NVEC200_001365_1.1	7.04175	0.0154443	0.276179	0.783065	0.908383	0.0250415	0.454978	0.650256	0.86601	0.0202429	0.511864	0.610041	0.886925	0.00497997	0.805969	0.422454	0.648711	0.0321533	0.828872	0.409441	0.812577	0.00959718	0.123315	0.902141	0.962336	-0.00669532	-5.07992	2.12609e-06	9.50479e-05
NVEC200_001366_1.1	7.04262	-0.0261829	-0.491446	0.624346	0.828696	-0.0095298	-0.181399	0.856475	0.955838	-0.0178564	-0.473939	0.636728	0.895396	0.000329438	0.0558454	0.955593	0.980094	-0.00621242	-0.167763	0.867158	0.972527	0.0166531	0.22417	0.82315	0.924427	-0.00337742	-2.68309	0.00872733	0.0544638
NVEC200_001368_1.1	3.99192	-0.299422	-2.12581	0.0363667	0.193714	-0.113404	-0.844878	0.400507	0.721521	-0.206413	-2.07008	0.0414241	0.419455	-0.00412769	-0.272818	0.785643	0.894119	0.137064	1.46494	0.14656	0.604025	0.186018	0.981214	0.329221	0.599088	-3.56743e-05	-0.0111143	0.991158	0.995937
NVEC200_001369_1.1	4.79446	0.156017	1.59141	0.115137	0.367662	-0.0912981	-0.95822	0.340602	0.674619	0.0323594	0.466605	0.641946	0.89751	0.0194095	1.80834	0.0740028	0.223207	0.0230045	0.341908	0.733243	0.93521	-0.247315	-1.83623	0.0697329	0.244336	-0.00840346	-3.69777	0.000379661	0.00542108
NVEC200_001370_1.1	3.77493	0.0944026	0.830585	0.408477	0.687935	-0.295228	-2.6402	0.00981687	0.109122	-0.100413	-1.24924	0.214921	0.66035	-0.026022	-2.05606	0.0427679	0.157286	-0.144034	-1.8379	0.0694832	0.482023	-0.389631	-2.4642	0.0156949	0.0883487	-0.00264464	-0.987246	0.326254	0.555888
NVEC200_001371_1.1	5.47185	-0.170113	-2.64891	0.00958599	0.0866545	-0.0140042	-0.221037	0.825581	0.944333	-0.0920588	-2.02707	0.0457104	0.431947	0.0165978	2.3229	0.0225135	0.102322	-0.0901971	-2.01319	0.04718	0.432572	0.156109	1.74245	0.0849558	0.274803	0.00076232	0.501935	0.616979	0.788846
NVEC200_001372_1.1	4.28411	-0.0460257	-0.485386	0.628621	0.83046	0.25887	2.75881	0.00706855	0.0914744	0.106422	1.58712	0.116107	0.563899	-0.00484236	-0.458509	0.647728	0.813315	-0.112233	-1.70215	0.0922916	0.522546	0.304895	2.29774	0.0239711	0.118922	0.00706258	3.18919	0.00198269	0.0188873
NVEC200_001373_1.1	2.65875	0.0200072	0.136434	0.891793	0.956607	0.000836526	0.00577702	0.995404	0.997487	0.0104219	0.100499	0.920179	0.985067	-0.00992106	-0.604805	0.54688	0.743947	-0.122349	-1.19801	0.234159	0.692673	-0.0191707	-0.0936231	0.925623	0.972456	0.0118852	3.4568	0.000847143	0.00995677
NVEC200_001374_1.1	2.56964	0.505181	2.8444	0.00554373	0.0608523	-0.466963	-2.73771	0.00749922	0.0943502	0.0191093	0.152036	0.87951	0.97705	-0.00918604	-0.483862	0.629697	0.800599	-0.00281571	-0.023664	0.981175	0.998097	-0.972144	-4.03373	0.000117388	0.00223484	0.000563999	0.141231	0.888013	0.946317
NVEC200_001375_1.1	4.05277	0.128495	1.18346	0.239846	0.536225	0.122699	1.17778	0.242092	0.575905	0.125597	1.63451	0.105758	0.541974	0.00660038	0.56471	0.573721	0.762343	0.110726	1.51737	0.132793	0.585323	-0.00579629	-0.0393786	0.968679	0.987522	0.00477779	1.95697	0.053552	0.182189
NVEC200_001376_1.1	8.37938	0.0670236	1.42207	0.158575	0.434483	0.0214606	0.460976	0.645964	0.86476	0.0442421	1.32743	0.187834	0.63479	-0.00989021	-1.89566	0.0613183	0.199295	0.0559093	1.70491	0.0917734	0.521466	-0.0455629	-0.692094	0.490718	0.735606	-0.00758637	-6.80249	1.23468e-09	2.66302e-07
NVEC200_001377_1.1	4.98326	0.099517	1.12546	0.263481	0.561887	0.0254642	0.29455	0.769038	0.921942	0.0624906	0.999203	0.320462	0.745474	-0.017425	-1.78804	0.0772444	0.229161	-0.0441894	-0.728885	0.468026	0.840584	-0.0740528	-0.605859	0.546183	0.771326	-0.00636942	-3.09356	0.00265755	0.023404
NVEC200_001378_1.1	3.29306	0.130918	0.96627	0.336583	0.627769	-0.050451	-0.378871	0.705705	0.895442	0.0402336	0.419891	0.675598	0.91027	0.0353422	2.34626	0.0212311	0.0980157	-0.115026	-1.21298	0.228416	0.686923	-0.181369	-0.963246	0.338089	0.608586	-0.00945411	-2.96965	0.00385045	0.0305009
NVEC200_001379_1.1	4.09217	-0.0998204	-1.0041	0.318108	0.611315	-0.0433076	-0.445834	0.656822	0.868277	-0.071564	-1.01778	0.311601	0.739984	-0.0162502	-1.47921	0.142689	0.341036	-0.0305636	-0.448476	0.654923	0.912196	0.0565128	0.411494	0.68172	0.853991	0.00648597	2.79669	0.00635166	0.0435956
NVEC200_001380_1.1	5.75124	0.11525	1.37392	0.172988	0.454621	0.0179285	0.217259	0.828514	0.945402	0.0665893	1.12249	0.264736	0.705237	-0.00715204	-0.770711	0.442962	0.665336	-0.0657921	-1.13271	0.260443	0.713768	-0.0973216	-0.834044	0.406536	0.672401	0.00335083	1.70491	0.0917722	0.256206
NVEC200_001381_1.1	3.54074	-0.0665071	-0.504729	0.615023	0.82384	-0.0403647	-0.31338	0.754741	0.915896	-0.0534359	-0.573358	0.567879	0.872034	0.00139543	0.0958089	0.923892	0.964445	-0.0694472	-0.766306	0.445565	0.829864	0.0261424	0.143555	0.886183	0.954925	-0.00233441	-0.759835	0.449403	0.665418
NVEC200_001382_1.1	2.88649	-0.00250081	-0.0185577	0.985236	0.993847	-0.00122772	-0.00922311	0.992662	0.997123	-0.00186426	-0.0195629	0.984437	0.996196	0.0108119	0.717362	0.475069	0.69151	-0.0999117	-1.06009	0.292031	0.734348	0.00127309	0.00676326	0.994619	0.997481	-0.0118078	-3.69643	0.000381397	0.00543326
NVEC200_001383_1.1	5.3359	0.0470932	0.723254	0.47146	0.732862	-0.0212303	-0.333396	0.739636	0.909399	0.0129315	0.280794	0.779534	0.947945	0.00465111	0.648619	0.51829	0.724942	-0.0150657	-0.335727	0.737883	0.936328	-0.0683236	-0.758879	0.449972	0.708215	-0.00148131	-0.975257	0.332132	0.561345
NVEC200_001384_1.1	3.26921	-0.109599	-0.775308	0.440256	0.712518	-0.303301	-2.19998	0.0304538	0.197676	-0.20645	-2.06472	0.0419211	0.421405	0.0183724	1.17679	0.242481	0.47124	-0.0646791	-0.662701	0.509271	0.858421	-0.193702	-0.993818	0.323062	0.593303	0.00533021	1.60692	0.111688	0.28895
NVEC200_001385_1.1	8.20307	0.264847	5.23738	1.11686e-06	0.000100224	-0.299084	-5.97935	4.80663e-08	1.5971e-05	-0.0171185	-0.478712	0.633342	0.894728	-0.0586585	-10.4592	4.59793e-17	3.53293e-14	-0.0405966	-1.15338	0.251909	0.707238	-0.563931	-7.97256	5.5654e-12	1.20037e-09	0.00319505	2.66626	0.00914102	0.0561618
NVEC200_001386_1.1	4.20659	-0.07854	-0.782223	0.436204	0.709444	-0.0425061	-0.432784	0.666241	0.873392	-0.060523	-0.852255	0.396408	0.791914	0.0300577	2.70827	0.00814008	0.050466	-0.0628551	-0.901378	0.369871	0.78926	0.0360338	0.259493	0.795867	0.912257	0.00481728	2.05588	0.0427854	0.157869
NVEC200_001387_1.1	5.03092	0.0555343	0.68169	0.497242	0.75153	-0.117425	-1.48837	0.140263	0.444822	-0.0309452	-0.536922	0.592689	0.880796	-0.00798961	-0.898719	0.371278	0.602375	0.0550982	0.99533	0.322331	0.757553	-0.172959	-1.55102	0.124521	0.348476	-0.00572358	-3.03658	0.00315553	0.026396
NVEC200_001388_1.1	7.11424	0.053696	1.2504	0.2145	0.507909	0.0515754	1.22166	0.225132	0.557588	0.0526357	1.73316	0.0866032	0.515125	-0.00708184	-1.49515	0.138488	0.334479	0.0678558	2.28321	0.0248501	0.339562	-0.00212062	-0.0355237	0.971743	0.988656	-0.00149629	-1.48159	0.142054	0.333986
NVEC200_001389_1.1	3.09009	-0.0722842	-0.478741	0.633321	0.833265	0.423697	2.92995	0.00432695	0.0687331	0.175707	1.6442	0.103736	0.540396	0.0370925	2.29795	0.0239584	0.106675	0.169011	1.67249	0.0980145	0.533808	0.495982	2.42771	0.0172512	0.0943714	2.3807e-05	0.00713921	0.99432	0.99724
NVEC200_001392_1.1	4.66791	0.0504035	0.641494	0.522885	0.766192	0.0578776	0.757018	0.451081	0.757077	0.0541406	0.974108	0.332698	0.752012	0.0115652	1.34356	0.182578	0.395724	0.0137263	0.254645	0.799597	0.95317	0.00747404	0.0691524	0.945027	0.979526	0.00486699	2.6852	0.00867652	0.054257
NVEC200_001393_1.1	4.36465	0.0434337	0.468183	0.640822	0.837847	0.184758	2.08348	0.0401364	0.23101	0.114096	1.73752	0.0858275	0.513462	0.0184191	1.8511	0.0675415	0.210668	0.155417	2.50123	0.0142452	0.279804	0.141324	1.12816	0.262346	0.531769	-0.00454515	-2.17696	0.0321864	0.131119
NVEC200_001394_1.1	4.98736	0.0706757	0.741825	0.460188	0.726549	-0.143909	-1.55687	0.123126	0.417345	-0.0366166	-0.543283	0.588322	0.879594	0.00710312	0.681681	0.497248	0.708808	0.0276819	0.425394	0.671598	0.91754	-0.214585	-1.64232	0.104126	0.312303	-0.00817517	-3.69235	0.000386727	0.00549009
NVEC200_001395_1.1	4.12414	-0.0925981	-0.944598	0.347475	0.639022	0.0011266	0.0118939	0.990537	0.996735	-0.0457358	-0.659416	0.511367	0.848872	-0.00989526	-0.925158	0.357438	0.590082	0.0103629	0.156421	0.876063	0.976125	0.0937247	0.700116	0.485719	0.731793	-0.00543369	-2.40356	0.0183555	0.0908796
NVEC200_001396_1.1	3.41913	-0.10471	-0.783096	0.435693	0.709301	-0.0610608	-0.474858	0.636076	0.859521	-0.0828856	-0.875965	0.383457	0.783353	-0.00393938	-0.271062	0.786984	0.894537	0.0170786	0.189911	0.84982	0.969346	0.0436496	0.240229	0.810716	0.918613	-0.00107921	-0.351895	0.725766	0.858435
NVEC200_001397_1.1	10.1697	-0.00573295	-0.0496395	0.960546	0.985393	0.158216	1.37939	0.172017	0.488628	0.0762415	0.933567	0.353628	0.767134	-0.0238993	-1.85885	0.0671096	0.209775	-0.179262	-2.2183	0.0296683	0.368255	0.163949	1.01074	0.315503	0.584865	-0.00220571	-0.803145	0.424517	0.644402
NVEC200_001398_1.1	5.10087	0.0418719	0.563699	0.574406	0.799438	-0.206918	-2.85145	0.00543271	0.0785063	-0.082523	-1.57071	0.119873	0.567867	-0.0311892	-3.80663	0.000261315	0.00399811	-0.0166171	-0.32663	0.744731	0.938086	-0.24879	-2.42499	0.0173728	0.0948828	0.00212048	1.22007	0.22573	0.443453
NVEC200_001400_1.1	2.16485	-0.367436	-1.57783	0.118227	0.373606	-0.2138	-0.99052	0.324662	0.659081	-0.290618	-1.75977	0.0819546	0.505136	-0.0167168	-0.691192	0.491282	0.70345	0.313559	2.11534	0.0372545	0.399308	0.153637	0.505023	0.614817	0.816612	0.00578266	1.13601	0.259064	0.484
NVEC200_001401_1.1	5.15661	-0.0466502	-0.688662	0.492865	0.749625	-0.0968834	-1.47134	0.144801	0.452375	-0.0717668	-1.49767	0.137831	0.589014	0.0169981	2.29071	0.0243929	0.107848	0.0262835	0.565689	0.573059	0.884407	-0.0502332	-0.539663	0.590805	0.800728	0.000609084	0.387024	0.699682	0.841425
NVEC200_001402_1.1	2.81242	0.186488	1.04505	0.298891	0.595168	-0.0204241	-0.116844	0.907253	0.972653	0.083032	0.657888	0.512344	0.849691	0.0143056	0.725786	0.469914	0.687671	-0.126669	-1.02586	0.307795	0.746799	-0.206912	-0.837201	0.404769	0.671222	0.00810885	1.97033	0.0519749	0.178657
NVEC200_001403_1.1	4.92856	-0.0356281	-0.412382	0.681072	0.859367	-0.0663528	-0.787679	0.433021	0.745493	-0.0509905	-0.834394	0.40634	0.798393	-0.00325797	-0.342869	0.732523	0.864596	-0.0121509	-0.205011	0.838041	0.966136	-0.0307247	-0.257993	0.79702	0.912768	-0.000294702	-0.146409	0.883937	0.944954
NVEC200_001404_1.1	5.33758	0.210156	2.80572	0.00619098	0.0652201	-0.0950059	-1.29726	0.197966	0.52408	0.0575752	1.08678	0.280129	0.718086	-0.00296002	-0.359264	0.720266	0.860038	-0.0186785	-0.362286	0.718015	0.930562	-0.305162	-2.94718	0.00411384	0.0334716	-0.0041892	-2.40184	0.0184363	0.0910351
NVEC200_001405_1.1	6.18376	-0.0652923	-0.878683	0.381989	0.668623	0.0206216	0.282516	0.778218	0.926267	-0.0223353	-0.425019	0.67187	0.90857	-0.0164239	-1.99935	0.0486851	0.17101	-0.00558197	-0.108753	0.913648	0.983843	0.0859139	0.832414	0.40745	0.673097	6.57186e-05	0.0375997	0.970093	0.986121
NVEC200_001406_1.1	7.62323	0.00981047	0.141535	0.887774	0.955466	0.0706551	1.03111	0.30534	0.64197	0.0402328	0.820808	0.413995	0.803625	-0.0179527	-2.33549	0.0218142	0.100255	-0.0263476	-0.545914	0.586519	0.888882	0.0608446	0.627913	0.531702	0.761927	0.002653	1.61666	0.109564	0.285499
NVEC200_001407_1.1	7.46545	0.0745207	1.41841	0.159636	0.436471	-0.0431708	-0.829907	0.408858	0.727954	0.015675	0.421915	0.674125	0.909646	-0.0079386	-1.36028	0.177247	0.388844	-0.0883871	-2.40988	0.0180605	0.304386	-0.117691	-1.5999	0.11324	0.330447	0.00356874	2.86473	0.00522898	0.0377311
NVEC200_001408_1.1	5.53758	0.187173	2.40723	0.0181837	0.127816	-0.00726113	-0.0947818	0.924706	0.977727	0.0899559	1.63596	0.105455	0.54071	-0.0145226	-1.68445	0.0956722	0.263307	-0.0849755	-1.57704	0.118408	0.565765	-0.194434	-1.79485	0.0761444	0.257774	-0.00544047	-2.98211	0.00371122	0.0296307
NVEC200_001409_1.1	5.49707	0.355915	4.03295	0.000117716	0.00378849	-0.184267	-2.14539	0.0347022	0.213327	0.085824	1.3748	0.172717	0.62468	-0.0613604	-6.34359	9.68866e-09	9.68394e-07	0.0176138	0.29388	0.769548	0.944205	-0.540182	-4.44891	2.53715e-05	0.000669351	0.00316978	1.5541	0.123783	0.308117
NVEC200_001410_1.1	4.9841	0.00301143	0.0334708	0.973376	0.990373	0.0892432	1.01843	0.311294	0.648212	0.0461273	0.724797	0.470518	0.827656	-0.00861704	-0.873346	0.384874	0.615538	0.0258175	0.420179	0.675389	0.918875	0.0862318	0.696092	0.488223	0.733444	0.00468766	2.25319	0.026757	0.116196
NVEC200_001411_1.1	2.69731	-0.0404024	-0.229131	0.819304	0.92619	0.2664	1.51459	0.133495	0.43515	0.112999	0.906283	0.367285	0.77408	0.0286795	1.44819	0.151151	0.352475	-0.145704	-1.16798	0.245998	0.703471	0.306802	1.2334	0.220741	0.484605	0.00678261	1.64476	0.103622	0.27598
NVEC200_001412_1.1	2.82518	-0.0878188	-0.491759	0.624125	0.828696	0.10132	0.605808	0.546217	0.810622	0.00675041	0.0533424	0.957581	0.99279	-0.0294648	-1.56959	0.120133	0.304771	0.224237	1.95318	0.0540059	0.447104	0.189138	0.801641	0.424941	0.689302	0.00464402	1.19262	0.236255	0.456757
NVEC200_001414_1.1	0.394336	-0.439138	-1.14205	0.256562	0.55462	-0.156251	-0.420115	0.675435	0.879267	-0.297694	-1.09428	0.276847	0.714934	-0.0738111	-1.74097	0.085218	0.24484	0.059586	0.233124	0.816212	0.960874	0.282887	0.538147	0.591847	0.801252	0.0037572	0.418611	0.67653	0.82693
NVEC200_001415_1.1	4.04622	-0.289322	-2.16726	0.0329419	0.183035	0.181293	1.40638	0.163167	0.478095	-0.0540142	-0.571857	0.56889	0.872824	0.0392945	2.70431	0.00822999	0.0508695	0.0775838	0.853286	0.395839	0.804421	0.470615	2.58319	0.0114556	0.0706472	-8.28281e-05	-0.0270482	0.978483	0.991279
NVEC200_001417_1.1	4.59459	-0.224429	-2.08294	0.0401865	0.206312	0.189373	1.79786	0.0756609	0.324669	-0.0175279	-0.230001	0.81863	0.963155	0.0172122	1.44985	0.150688	0.351879	-0.00435951	-0.0587761	0.953265	0.992332	0.413802	2.77864	0.00668451	0.0476402	0.00244553	0.975396	0.332063	0.561307
NVEC200_001423_1.1	4.36822	0.203536	0.932456	0.354186	0.645856	0.0197159	0.094682	0.924828	0.977727	0.111626	0.722411	0.472358	0.829004	0.00716938	0.306801	0.759871	0.87882	0.149693	1.02652	0.308049	0.74712	-0.18382	-0.624972	0.533945	0.762588	0.000575662	0.117234	0.906998	0.955004
NVEC200_001425_1.1	5.37604	-0.0876768	-0.96892	0.335266	0.626365	0.00359384	0.0407759	0.967568	0.989789	-0.0420415	-0.656819	0.513028	0.849794	0.00498703	0.502268	0.616746	0.792048	0.0364749	0.588058	0.558014	0.880867	0.0912707	0.732522	0.465815	0.71953	0.00050128	0.237869	0.812541	0.907412
NVEC200_001426_1.1	11.2128	-0.00362638	-0.0478501	0.96196	0.98553	-0.0673394	-0.897158	0.37244	0.701085	-0.0354829	-0.6621	0.509891	0.848368	-0.0060273	-0.716383	0.475929	0.692146	-0.0518843	-0.980239	0.330048	0.761849	-0.063713	-0.600252	0.550107	0.774155	0.011747	6.53083	6.40857e-09	1.01109e-06
NVEC200_001428_1.1	6.02515	0.0552681	0.913654	0.363419	0.654825	-0.00997068	-0.168206	0.866811	0.959125	0.0226487	0.529391	0.59788	0.882923	0.0215272	3.22867	0.00175382	0.0166385	0.00419197	0.100119	0.92048	0.98553	-0.0652388	-0.778395	0.438444	0.700121	-0.00383785	-2.70963	0.00810922	0.0516947
NVEC200_001429_1.1	2.3765	-0.369735	-1.9696	0.0520597	0.238317	0.378743	2.09717	0.0388748	0.227105	0.00450445	0.0339093	0.973027	0.9946	0.0276881	1.37031	0.174109	0.384365	0.0685532	0.542644	0.588759	0.889832	0.748478	2.93295	0.00428903	0.0346904	0.0130517	3.10472	0.00256903	0.0228553
NVEC200_001430_1.1	4.90508	0.000908577	0.0102811	0.99182	0.995878	0.117844	1.3699	0.174237	0.490626	0.0593765	0.94984	0.34482	0.76067	-0.00170709	-0.17621	0.860537	0.936914	0.0175779	0.291142	0.771634	0.944205	0.116936	0.961565	0.338928	0.609281	-0.00334202	-1.63462	0.105736	0.279372
NVEC200_001431_1.1	5.76763	0.000781441	0.0109999	0.991249	0.995784	-0.0714564	-1.02865	0.306491	0.643095	-0.0353375	-0.703292	0.483748	0.83535	0.0135864	1.73798	0.0857466	0.24567	0.0219767	0.448394	0.654981	0.912196	-0.0722378	-0.735511	0.464003	0.718828	0.00241926	1.45652	0.148841	0.343828
NVEC200_001432_1.1	6.75115	-0.153056	-2.9391	0.00421249	0.0509728	0.190485	3.73445	0.000335006	0.0130748	0.0187149	0.50813	0.612646	0.887668	0.00993947	1.73491	0.0862916	0.246599	0.109538	3.05074	0.00302426	0.14467	0.343541	4.7635	7.52841e-06	0.000241027	-0.00876228	-7.17011	2.3057e-10	7.66116e-08
NVEC200_001433_1.1	3.22544	0.0843345	0.752623	0.453704	0.72127	0.146845	1.33886	0.184096	0.506024	0.11559	1.4585	0.148296	0.597754	0.0243378	1.9685	0.0521881	0.178918	-0.0654433	-0.843001	0.401535	0.807801	0.0625107	0.403107	0.687857	0.858009	-0.00151402	-0.586169	0.559277	0.748932
NVEC200_001434_1.1	3.63277	-0.029454	-0.231362	0.817576	0.925665	0.299965	2.40979	0.0180649	0.149053	0.135256	1.50213	0.136678	0.587757	-0.00627999	-0.448752	0.654724	0.818006	-0.00800702	-0.092118	0.926816	0.986773	0.329419	1.87179	0.0645895	0.232182	0.000648236	0.222192	0.824684	0.91397
NVEC200_001436_1.1	6.78159	0.0560013	0.883011	0.379659	0.667362	0.0528321	0.849852	0.397736	0.719942	0.0544167	1.21319	0.228335	0.674311	-0.0102961	-1.475	0.143815	0.342184	0.0934118	2.13637	0.0354518	0.392247	-0.00316928	-0.0360564	0.97132	0.988585	-0.0101381	-6.81316	1.17636e-09	2.58253e-07
NVEC200_001437_1.1	1.11132	-0.272831	-0.952984	0.343234	0.634786	-0.117643	-0.420014	0.675508	0.87927	-0.195237	-0.964196	0.337615	0.757679	0.0843147	2.64055	0.00980749	0.0574706	-0.0691656	-0.340333	0.734424	0.935487	0.155188	0.391875	0.696107	0.862174	-0.0069298	-1.02331	0.308995	0.5383
NVEC200_001438_1.1	0.259596	-0.555868	-1.12057	0.265688	0.563848	0.121432	0.255328	0.799098	0.934562	-0.217218	-0.618716	0.53779	0.858848	-0.0624932	-1.1672	0.246454	0.475877	0.0800668	0.24527	0.80685	0.957288	0.6773	1.00798	0.316379	0.585255	0.000599506	0.0535298	0.957438	0.979597
NVEC200_001439_1.1	2.63827	-0.0380562	-0.220558	0.825952	0.928937	-0.342645	-2.08308	0.0401728	0.231111	-0.19035	-1.55837	0.12277	0.572622	-0.0277756	-1.49028	0.139761	0.336051	0.0367237	0.321721	0.748434	0.938266	-0.304588	-1.31102	0.193294	0.4463	-0.00133149	-0.337628	0.736456	0.86583
NVEC200_001440_1.1	8.60145	-0.0433298	-0.536054	0.593436	0.812176	-0.203308	-2.54308	0.0129529	0.125394	-0.123319	-2.15745	0.034028	0.40205	-0.00415922	-0.464168	0.643811	0.810467	0.0129873	0.230465	0.81833	0.960874	-0.159978	-1.41507	0.161001	0.401897	0.00234077	1.22078	0.225821	0.443489
NVEC200_001441_1.1	3.94817	-0.0939335	-0.910486	0.365077	0.656285	0.146743	1.45463	0.149365	0.45961	0.0264048	0.361861	0.718332	0.923632	-0.0329957	-2.89419	0.00480201	0.0343631	-0.0329457	-0.468452	0.640631	0.908935	0.240676	1.68743	0.0950954	0.29441	-0.002093	-0.874548	0.384223	0.609423
NVEC200_001442_1.1	4.48309	0.0275365	0.186149	0.852816	0.940569	0.00702248	0.0481087	0.961754	0.98781	0.0172795	0.16518	0.869233	0.974385	-0.0131319	-0.796304	0.428295	0.654144	-0.0984787	-0.957245	0.341429	0.769484	-0.020514	-0.0993822	0.921092	0.970728	0.0150542	4.31624	4.65338e-05	0.00106138
NVEC200_001444_1.1	2.95979	1.26137	7.12467	2.84036e-10	8.39061e-08	-0.441926	-2.52279	0.0134579	0.128277	0.409721	3.27267	0.00152803	0.175566	0.00407072	0.216945	0.828758	0.920061	-0.345509	-2.87276	0.00510927	0.186944	-1.70329	-6.87592	8.84645e-10	1.01643e-07	-3.78175e-05	-0.00972668	0.992262	0.996314
NVEC200_001445_1.1	2.36744	-0.0279005	-0.153598	0.878282	0.949991	-0.149459	-0.838782	0.403886	0.724343	-0.0886797	-0.690292	0.491845	0.839516	-0.00589265	-0.291604	0.771282	0.886347	-0.10387	-0.830243	0.408669	0.812449	-0.121558	-0.482482	0.630673	0.825982	-0.00192985	-0.451308	0.652889	0.812739
NVEC200_001446_1.1	1.39672	-0.214644	-0.833398	0.406898	0.687288	0.0135805	0.0554573	0.955901	0.987195	-0.100532	-0.551313	0.58283	0.877994	-0.0189493	-0.685716	0.494712	0.706469	0.0448135	0.264036	0.792376	0.950679	0.228225	0.659942	0.511031	0.748383	-0.000461645	-0.0798318	0.936554	0.969926
NVEC200_001447_1.1	4.55386	-0.041993	-0.528527	0.598477	0.814265	0.0574933	0.744842	0.458371	0.76203	0.00775015	0.13789	0.890645	0.979131	-0.00368543	-0.423421	0.673031	0.831645	0.0272812	0.503922	0.615588	0.901044	0.0994862	0.911775	0.364402	0.634196	-0.00417278	-2.27085	0.02562	0.11253
NVEC200_001448_1.1	0.799123	0.0881238	0.236666	0.813471	0.923863	0.560917	1.51798	0.132639	0.434066	0.32452	1.2325	0.221076	0.665339	-0.0331145	-0.802098	0.424678	0.650892	-0.141158	-0.551771	0.582517	0.887748	0.472793	0.904764	0.368084	0.637087	0.0138815	1.64407	0.103764	0.276239
NVEC200_001450_1.1	5.92682	-0.000784585	-0.0137784	0.989038	0.995137	0.119878	2.15327	0.034059	0.211476	0.0595468	1.4785	0.142879	0.59335	-0.0129282	-2.06515	0.0418795	0.155408	0.0309157	0.791046	0.431064	0.824382	0.120663	1.53297	0.128906	0.355347	0.000701576	0.528475	0.598513	0.776313
NVEC200_001451_1.1	5.31017	-0.581068	-5.8279	9.28659e-08	1.24097e-05	0.709469	7.40995	7.67796e-11	9.43928e-08	0.0642004	0.909873	0.365402	0.77408	0.0621835	5.81225	9.93359e-08	7.09259e-06	0.251454	3.75711	0.000310182	0.0448632	1.29054	9.53949	3.50807e-15	1.72513e-12	-0.0096046	-4.2507	5.33367e-05	0.00114822
NVEC200_001452_1.1	5.63825	0.182722	2.37607	0.019689	0.134029	0.19969	2.67481	0.00892866	0.103263	0.191206	3.51474	0.00070066	0.136236	0.00855361	1.02046	0.310334	0.543483	0.0986146	1.8798	0.0634755	0.465613	0.0169679	0.160787	0.872633	0.949137	-0.0163802	-9.21878	1.57506e-14	2.42047e-11
NVEC200_001458_1.1	3.19464	-0.357312	-2.36929	0.0200304	0.135677	-0.0263769	-0.180012	0.857561	0.956181	-0.191844	-1.79827	0.0755959	0.494168	0.0459485	2.7707	0.00683603	0.0446083	-0.0160863	-0.154857	0.877292	0.976159	0.330935	1.5977	0.113728	0.331006	0.000480407	0.136738	0.891553	0.947728
NVEC200_001459_1.1	3.13934	-0.122518	-0.974744	0.332384	0.62428	0.137153	1.12904	0.261977	0.59854	0.00731742	0.0822828	0.93461	0.988247	0.0086645	0.632557	0.528679	0.730525	0.0507017	0.595471	0.553072	0.879562	0.259672	1.51247	0.134033	0.36389	0.000808512	0.28166	0.778871	0.889838
NVEC200_001460_1.1	3.12307	0.0186956	0.130526	0.896451	0.958383	0.0856466	0.615478	0.539843	0.808106	0.0521711	0.514899	0.607927	0.885632	-0.0292206	-1.85717	0.066664	0.208979	-0.0441577	-0.455843	0.649636	0.910534	0.066951	0.340359	0.734405	0.881889	0.000176122	0.053658	0.95733	0.979597
NVEC200_001461_1.1	3.95963	-0.200968	-1.78446	0.0778277	0.295143	0.135138	1.23256	0.221054	0.552254	-0.032915	-0.413175	0.680493	0.912122	0.0172589	1.39556	0.166392	0.373766	0.00749757	0.0969952	0.922953	0.986106	0.336105	2.16849	0.0328456	0.147159	0.00384365	1.47681	0.143331	0.336045
NVEC200_001462_1.1	2.96958	-0.419532	-1.63131	0.10698	0.354632	0.0276791	0.1123	0.910883	0.973113	-0.195926	-1.07643	0.285154	0.719531	0.00316321	0.113589	0.909865	0.959938	0.0332489	0.193052	0.847435	0.969346	0.447211	1.28426	0.202968	0.459692	-0.00388669	-0.657741	0.5127	0.715695
NVEC200_001463_1.1	2.31268	-0.0915308	-0.59109	0.55599	0.788208	0.0634986	0.402535	0.688276	0.885852	-0.0140161	-0.127983	0.898457	0.980291	-0.0366429	-2.05355	0.0430156	0.157967	-0.312729	-2.84652	0.00551017	0.190814	0.155029	0.695041	0.488878	0.734213	-0.0100928	-2.67976	0.00880783	0.0547716
NVEC200_001464_1.1	2.92139	0.113736	0.821614	0.413538	0.691792	-0.0289081	-0.210331	0.833901	0.947415	0.042414	0.433294	0.665872	0.905585	0.0657494	4.21621	6.0508e-05	0.00129147	-0.17491	-1.75824	0.0822174	0.507165	-0.142644	-0.733894	0.464983	0.719103	0.00315276	0.966823	0.336307	0.564931
NVEC200_001465_1.1	5.38209	0.0735058	0.901661	0.369721	0.659956	0.134271	1.68563	0.0954444	0.365608	0.103889	1.80172	0.0750463	0.493569	0.0128987	1.43937	0.153626	0.355567	0.0120993	0.215583	0.829816	0.964154	0.0607655	0.539563	0.590874	0.800728	-0.00706812	-3.72984	0.000340338	0.00497517
NVEC200_001467_1.1	4.59415	0.0557361	0.441816	0.659774	0.849314	-0.0735032	-0.598638	0.551048	0.812471	-0.00888354	-0.0995513	0.920941	0.985067	-0.0028083	-0.202723	0.839849	0.925852	0.0120194	0.139208	0.889624	0.977924	-0.129239	-0.744571	0.458639	0.714459	0.0017906	0.611277	0.54269	0.737464
NVEC200_001469_1.1	1.64431	0.295922	1.25836	0.21162	0.504737	-0.0723662	-0.331777	0.740854	0.910061	0.111778	0.670291	0.504444	0.845468	-0.0555358	-2.26373	0.0260732	0.112774	0.178767	1.20021	0.233308	0.692156	-0.368288	-1.19793	0.234193	0.501161	-0.00482547	-0.947933	0.345784	0.573849
NVEC200_001470_1.1	2.43067	0.228615	1.20379	0.23193	0.528418	0.0451975	0.241869	0.80945	0.937617	0.136906	1.01936	0.310853	0.739984	0.0307863	1.46272	0.14714	0.346739	-0.137692	-1.03558	0.303265	0.742843	-0.183418	-0.694146	0.489436	0.734687	-0.00302652	-0.688267	0.493112	0.700236
NVEC200_001471_1.1	5.41364	0.000843134	0.0117892	0.990621	0.995479	-0.155162	-2.22695	0.0285273	0.190317	-0.0771593	-1.52525	0.130817	0.580188	0.00635011	0.808858	0.420799	0.646987	0.0143784	0.292961	0.770248	0.944205	-0.156005	-1.58382	0.116856	0.336054	-0.0049193	-2.94701	0.0041158	0.0319442
NVEC200_001472_1.1	1.62099	0.0283424	0.130283	0.896642	0.958383	-0.180644	-0.852952	0.396024	0.718253	-0.0761509	-0.494864	0.621941	0.891749	-0.028328	-1.17972	0.241323	0.469621	-0.0686729	-0.46291	0.644583	0.909521	-0.208987	-0.698022	0.487021	0.732498	0.00765023	1.52062	0.131974	0.319783
NVEC200_001473_1.1	4.86977	-0.148189	-1.75803	0.082252	0.305224	-0.106644	-1.2919	0.199808	0.526793	-0.127417	-2.13727	0.0353771	0.405445	-0.0154702	-1.65843	0.100824	0.273447	-0.0490296	-0.845553	0.400117	0.806758	0.0415442	0.355946	0.722741	0.875222	0.0023256	1.17409	0.243555	0.465671
NVEC200_001474_1.1	7.29847	-0.00370459	-0.0858376	0.931792	0.973881	0.0531291	1.24884	0.215065	0.544148	0.0247123	0.809694	0.420321	0.806989	-0.00407224	-0.853077	0.395955	0.624931	0.0248376	0.828758	0.409505	0.812577	0.0568337	0.944741	0.347402	0.618249	-0.000908174	-0.891566	0.37508	0.601635
NVEC200_001475_1.1	0.494285	-0.166778	-0.487974	0.626794	0.829953	0.00951004	0.0265764	0.978858	0.992417	-0.0786342	-0.325031	0.745937	0.933484	-0.0149745	-0.372942	0.710097	0.854438	-0.540715	-2.15545	0.0338832	0.383744	0.176289	0.348692	0.728162	0.878596	-0.00419248	-0.490887	0.62474	0.79402
NVEC200_001476_1.1	4.10996	-0.214515	-1.53056	0.129653	0.390202	0.0346592	0.254095	0.800046	0.934691	-0.089928	-0.90707	0.366976	0.77408	-0.0057841	-0.375466	0.708264	0.853226	0.014073	0.146975	0.883506	0.97699	0.249174	1.29222	0.199842	0.455394	-0.000258774	-0.0795011	0.936824	0.970042
NVEC200_001481_1.1	3.04214	0.0419558	0.234197	0.815381	0.924981	0.111574	0.667148	0.50644	0.791731	0.0767649	0.604554	0.547046	0.862442	0.000473717	0.0253502	0.979834	0.991434	0.226295	1.9589	0.0533209	0.445285	0.0696181	0.29516	0.768574	0.899097	0.00522446	1.34578	0.181864	0.389328
NVEC200_001482_1.1	2.77189	-0.1598	-1.00338	0.318457	0.611616	0.187913	1.22041	0.2256	0.558123	0.0140565	0.124747	0.901011	0.980999	-0.0220889	-1.27157	0.206907	0.426584	0.0257647	0.240625	0.810411	0.958275	0.347713	1.59779	0.113708	0.331006	0.00888224	2.45643	0.0160156	0.0825906
NVEC200_001484_1.1	2.18455	-0.202442	-0.927644	0.356154	0.647352	0.00706367	0.0342423	0.972762	0.991436	-0.0976893	-0.63205	0.529008	0.855249	0.0363533	1.56189	0.121938	0.307383	0.105981	0.726591	0.469424	0.840837	0.209506	0.719432	0.473799	0.724234	0.00366402	0.750263	0.455116	0.670051
NVEC200_001485_1.1	3.74214	0.189311	1.65401	0.101722	0.344036	-0.0927561	-0.835036	0.405981	0.725927	0.0482774	0.596248	0.552555	0.86521	0.0072117	0.576553	0.565728	0.756642	-0.0176714	-0.225851	0.821846	0.96093	-0.282067	-1.79642	0.0758927	0.257457	0.00133855	0.509886	0.61142	0.784603
NVEC200_001486_1.1	4.95667	-0.0174159	-0.251222	0.802233	0.919262	0.0618536	0.912823	0.363854	0.695024	0.0222188	0.453143	0.651572	0.901101	0.0304334	3.98445	0.000139979	0.00245669	-0.000605554	-0.0126114	0.989967	0.999586	0.0792695	0.82743	0.410253	0.675459	0.00303501	1.88162	0.0632254	0.20279
NVEC200_001487_1.1	5.41883	-0.0305751	-0.459029	0.647356	0.84123	-0.134399	-2.03874	0.044506	0.245436	-0.0824872	-1.75126	0.0834183	0.506605	0.00884454	1.18972	0.237388	0.465166	-0.132427	-2.84066	0.00560351	0.190814	-0.103824	-1.11371	0.268466	0.537915	0.00406404	2.57183	0.0118102	0.0670212
NVEC200_001488_1.1	3.66099	0.124459	1.06455	0.290021	0.586724	0.102249	0.901393	0.369863	0.699975	0.113354	1.37054	0.174036	0.626586	0.0158713	1.24344	0.217039	0.440303	-0.00448429	-0.0561373	0.955361	0.993059	-0.0222097	-0.138513	0.890154	0.956772	0.000808491	0.303053	0.762571	0.881197
NVEC200_001489_1.1	2.48412	-0.075854	-0.44161	0.659865	0.849314	0.278468	1.68197	0.0961539	0.366661	0.101307	0.833528	0.406825	0.798924	0.0389357	2.09617	0.0389663	0.148171	0.0507771	0.436857	0.663295	0.914781	0.354322	1.51441	0.13354	0.363055	-0.00326587	-0.847279	0.39916	0.622429
NVEC200_001490_1.1	5.6757	-0.360711	-5.29365	8.85405e-07	8.18434e-05	0.169959	2.54657	0.0126348	0.123696	-0.0953759	-1.97905	0.0509673	0.448099	0.0361712	4.8124	6.20879e-06	0.000213215	0.0177332	0.375803	0.707976	0.928123	0.53067	5.62364	2.21898e-07	1.20708e-05	0.00319152	1.99729	0.0489131	0.172254
NVEC200_001491_1.1	5.42173	0.316902	4.08317	9.82599e-05	0.00327373	-0.0558411	-0.741039	0.460661	0.76381	0.130531	2.37744	0.0196202	0.351969	-0.0148037	-1.74956	0.083714	0.241819	0.0553091	1.04667	0.298145	0.73929	-0.372743	-3.49932	0.000737126	0.00935214	-0.00898793	-5.02443	2.66157e-06	0.000111058
NVEC200_001492_1.1	5.28757	0.0631359	0.961201	0.33911	0.630269	0.0983428	1.5229	0.131403	0.431944	0.0807394	1.7381	0.0857241	0.513462	0.024264	3.33919	0.00123774	0.0130504	-0.0588034	-1.28612	0.201808	0.657923	0.0352069	0.385574	0.700752	0.864617	0.0057429	3.74247	0.000325943	0.00479323
NVEC200_001493_1.1	3.99786	-0.374863	-2.46694	0.0156668	0.116803	0.289312	2.01673	0.0469307	0.252301	-0.0427757	-0.397445	0.692051	0.916171	-0.0166075	-1.03448	0.303893	0.536791	0.253665	2.57006	0.0119396	0.260413	0.664174	3.2799	0.0015147	0.0163492	-0.00795692	-2.35777	0.0207187	0.0984977
NVEC200_001494_1.1	6.24947	0.0762169	1.31159	0.193103	0.48259	0.0201482	0.35097	0.726458	0.905654	0.0481825	1.17252	0.244184	0.682774	-0.0233498	-3.61522	0.000501726	0.00659202	-0.0915355	-2.26649	0.025897	0.346817	-0.0560687	-0.690671	0.491607	0.736333	-0.00205607	-1.49893	0.137506	0.328277
NVEC200_001495_1.1	4.16619	0.0765514	0.748734	0.456033	0.722763	-0.204953	-2.05627	0.0427474	0.239823	-0.064201	-0.887749	0.377119	0.778949	-0.0171533	-1.52324	0.131318	0.321984	-0.0309981	-0.443286	0.658657	0.913917	-0.281505	-1.99776	0.0488605	0.193148	0.00489573	2.05774	0.0426021	0.157566
NVEC200_001496_1.1	5.52171	-0.219698	-2.68015	0.00879835	0.0822128	0.234048	2.94235	0.00417254	0.0671829	0.00717481	0.123726	0.901817	0.981135	-0.00753905	-0.842071	0.402053	0.630142	0.118457	2.12857	0.0361114	0.395604	0.453746	4.03549	0.000116648	0.00223376	-0.0117555	-6.17786	2.01614e-08	2.69418e-06
NVEC200_001497_1.1	2.04308	0.240637	1.35789	0.178002	0.462339	0.0134723	0.0764946	0.939201	0.982935	0.127055	1.01391	0.31343	0.741278	0.00113116	0.056952	0.954714	0.979472	-0.203949	-1.63862	0.104897	0.547628	-0.227165	-0.912057	0.364254	0.634196	0.0082924	2.00257	0.0483308	0.171184
NVEC200_001498_1.1	4.67639	-0.270405	-2.84888	0.00547289	0.0603243	0.262844	2.83708	0.00566129	0.0801841	-0.00378065	-0.0563136	0.955221	0.992351	0.00965433	0.926149	0.356925	0.589625	1.78009e-05	0.000273791	0.999782	0.999963	0.53325	4.0712	0.000102597	0.00200528	0.00283323	1.28894	0.200828	0.41308
NVEC200_001503_1.1	4.59055	0.0881336	0.460404	0.646595	0.841006	0.209815	1.13001	0.26217	0.59887	0.148974	1.10007	0.274915	0.712694	-0.0271138	-1.2984	0.198238	0.415228	0.045459	0.351032	0.726575	0.932608	0.121681	0.463629	0.644293	0.833688	0.00439343	1.0043	0.318549	0.548493
NVEC200_001506_1.1	1.41421	0.330761	0.572052	0.569057	0.796447	-0.502246	-0.881836	0.380781	0.707349	-0.0857423	-0.209692	0.834497	0.965929	0.0870328	1.35565	0.179419	0.391303	-0.263606	-0.640605	0.5238	0.866702	-0.833007	-1.03432	0.304424	0.574652	-1.05736e-05	-0.000783874	0.999377	0.999554
NVEC200_001509_1.1	1.61352	-0.267756	-1.00868	0.315919	0.609718	-0.601995	-2.31195	0.0231378	0.168817	-0.434876	-2.3164	0.0228823	0.371524	0.0218521	0.741621	0.460311	0.680257	-0.127381	-0.691909	0.490833	0.851057	-0.334239	-0.907846	0.366463	0.635982	0.00423589	0.669623	0.504868	0.709435
NVEC200_001519_1.1	5.73439	0.0802092	1.10595	0.27179	0.570738	0.0867439	1.21092	0.2292	0.561647	0.0834766	1.62764	0.107211	0.544077	-0.00982937	-1.21959	0.225908	0.450905	-0.0846548	-1.67874	0.0967846	0.531667	0.00653471	0.0645092	0.948713	0.981361	0.000994913	0.583037	0.561374	0.750166
NVEC200_001521_1.1	2.20009	-0.122275	-0.515721	0.607355	0.820169	0.0846372	0.375387	0.708284	0.896863	-0.0188187	-0.112107	0.910996	0.982927	-0.0270101	-1.06292	0.290755	0.523819	0.0716992	0.460387	0.646385	0.909667	0.206912	0.649829	0.517511	0.752488	0.0044005	0.833836	0.406653	0.628854
NVEC200_001522_1.1	0.832926	0.398065	1.17579	0.242879	0.539274	-0.433381	-1.36526	0.175685	0.492293	-0.0176581	-0.0736092	0.94149	0.989217	-0.0558376	-1.57183	0.119614	0.304269	0.191486	0.876082	0.383393	0.798212	-0.831446	-1.85651	0.0667589	0.23707	-0.0052579	-0.705317	0.482494	0.692551
NVEC200_001523_1.1	4.72991	0.0180642	0.20779	0.835878	0.933189	0.0424737	0.50718	0.61331	0.84912	0.0302689	0.492056	0.623916	0.892656	0.0347438	3.68696	0.000393869	0.0054591	0.104585	1.76866	0.0804495	0.503714	0.0244095	0.206259	0.837069	0.932069	1.27736e-05	0.00643331	0.994882	0.997441
NVEC200_001524_1.1	3.88903	-0.027855	-0.216523	0.829086	0.930342	0.27126	2.16741	0.0329305	0.207402	0.121703	1.33737	0.184581	0.632489	-0.0241273	-1.71289	0.0902879	0.253309	0.0027811	0.0319462	0.974588	0.997253	0.299115	1.69064	0.094478	0.293365	0.00667681	2.27531	0.0253399	0.111916
NVEC200_001525_1.1	2.93258	0.165205	1.10768	0.271045	0.5701	-0.232957	-1.60909	0.111214	0.397344	-0.0338762	-0.321079	0.748919	0.934213	-0.0469272	-2.85517	0.00537486	0.0373536	-0.0443193	-0.439136	0.66165	0.914476	-0.398162	-1.94559	0.0549263	0.208351	0.00852016	2.47431	0.0152868	0.080143
NVEC200_001526_1.1	3.35028	0.0486383	0.354355	0.723929	0.882759	0.0570267	0.425123	0.671795	0.876122	0.0528325	0.544204	0.58769	0.878962	-0.0207573	-1.3697	0.174299	0.384571	-0.0550229	-0.5873	0.55852	0.880867	0.00838843	0.0442305	0.964822	0.985925	0.00234244	0.739685	0.461479	0.675809
NVEC200_001527_1.1	5.19357	0.0474126	0.476189	0.63514	0.833965	0.0911432	0.926984	0.356514	0.689582	0.0692779	0.983922	0.327898	0.749679	-0.00921493	-0.832329	0.407515	0.635386	-0.100801	-1.45669	0.148822	0.606435	0.0437306	0.314524	0.753881	0.891789	0.00734795	3.14306	0.0022904	0.0210765
NVEC200_001528_1.1	1.56424	-0.44703	-2.21126	0.0296347	0.173242	0.0610431	0.305651	0.760599	0.918006	-0.192994	-1.34998	0.180516	0.629932	0.0362465	1.6076	0.111539	0.291386	-0.104067	-0.737324	0.462906	0.838053	0.508073	1.79901	0.0754781	0.256546	-0.000627119	-0.131239	0.895889	0.94916
NVEC200_001529_1.1	4.37915	0.0956958	0.978542	0.330514	0.622614	-0.205765	-2.15229	0.0341386	0.211649	-0.0550346	-0.795657	0.428393	0.809097	-0.0388787	-3.59349	0.000539573	0.00695336	-0.0568886	-0.850936	0.397137	0.805295	-0.301461	-2.23029	0.0282965	0.133382	0.00451277	1.97802	0.0510852	0.17663
NVEC200_001530_1.1	0.769717	0.995503	2.42842	0.0172198	0.123266	0.443993	1.17861	0.241762	0.575567	0.719748	2.47408	0.015296	0.329082	-0.0584112	-1.43631	0.154494	0.356818	0.479226	1.90221	0.0604461	0.461282	-0.551511	-1.03967	0.301366	0.57173	0.0164454	2.02779	0.0456357	0.164604
NVEC200_001531_1.1	3.48696	0.286128	2.41174	0.0179747	0.126927	-0.150576	-1.29595	0.198413	0.524804	0.0677757	0.807728	0.421446	0.8075	0.0121913	0.932465	0.353672	0.586923	-0.143064	-1.74075	0.085256	0.511917	-0.436704	-2.6583	0.00934283	0.0610312	-0.00122902	-0.447985	0.655275	0.813651
NVEC200_001532_1.1	5.0447	-0.0761938	-0.846255	0.399728	0.681116	0.170195	1.923	0.0577452	0.281602	0.0470008	0.738139	0.462413	0.823042	-0.00691617	-0.693249	0.489996	0.702427	-0.0616971	-0.992554	0.323674	0.75778	0.246389	1.96881	0.0521519	0.201685	-0.00465847	-2.20852	0.0298317	0.124491
NVEC200_001533_1.1	2.47066	-0.0600797	-0.326622	0.744737	0.891931	0.251001	1.34645	0.181647	0.502061	0.0954607	0.733869	0.464998	0.824229	-0.0280019	-1.33439	0.18555	0.399702	-0.2414	-1.85837	0.0664918	0.474356	0.311081	1.18008	0.241178	0.508934	0.00764306	1.75671	0.0824784	0.239544
NVEC200_001535_1.1	2.34404	0.392422	2.31198	0.0231361	0.149184	-0.542317	-3.13792	0.00232159	0.0477247	-0.0749479	-0.62436	0.534022	0.85656	-0.0114971	-0.594644	0.553622	0.748512	-0.385713	-3.17908	0.0020456	0.118091	-0.934739	-3.825	0.000245192	0.00404616	0.00205686	0.502371	0.616673	0.788718
NVEC200_001536_1.1	3.51501	-0.00621908	-0.0374619	0.970207	0.989074	-0.151981	-0.923916	0.358207	0.690791	-0.0790999	-0.673808	0.502305	0.844652	-0.00294603	-0.158215	0.874671	0.943016	-0.131886	-1.13551	0.259429	0.713384	-0.145762	-0.626601	0.53264	0.762136	0.00585893	1.48875	0.140341	0.331862
NVEC200_001537_1.1	3.3517	0.129426	1.04317	0.299756	0.595501	-0.109349	-0.906108	0.367377	0.698018	0.0100381	0.114375	0.909203	0.982745	-0.0129434	-0.948959	0.345265	0.5792	-0.0560645	-0.663055	0.509045	0.858421	-0.238775	-1.39963	0.165173	0.408446	0.000623308	0.217345	0.828448	0.915906
NVEC200_001538_1.1	5.40156	-0.303063	-3.76559	0.000301068	0.00771111	0.166066	2.10923	0.0377928	0.223916	-0.0684983	-1.20335	0.2321	0.678598	0.0065911	0.743384	0.459248	0.679504	0.00502376	0.0907425	0.927905	0.987164	0.469129	4.21434	6.09246e-05	0.00132803	0.00341905	1.81581	0.0728378	0.221103
NVEC200_001540_1.1	8.01607	-0.235964	-4.48094	2.24655e-05	0.00106131	0.112071	2.14993	0.0343305	0.212303	-0.0619468	-1.66354	0.0997953	0.533603	-0.00617339	-1.05569	0.294025	0.526778	-0.0458039	-1.24648	0.215928	0.672907	0.348035	4.72131	8.88303e-06	0.000277178	0.00266383	2.12994	0.0359949	0.141426
NVEC200_001541_1.1	6.86435	0.00661309	0.121589	0.903505	0.961621	-0.0406611	-0.760521	0.448996	0.756158	-0.017024	-0.44259	0.659159	0.903726	0.000592975	0.0987666	0.92155	0.963257	0.0338589	0.898805	0.371232	0.790739	-0.0472742	-0.625327	0.53339	0.762585	-0.00183316	-1.4315	0.155864	0.354455
NVEC200_001542_1.1	4.69285	0.00729749	0.0885415	0.929649	0.973353	-0.147367	-1.82337	0.071675	0.314976	-0.0700346	-1.20148	0.232818	0.678662	-0.00941169	-1.03094	0.305421	0.538168	-0.0647074	-1.13819	0.25816	0.712555	-0.154664	-1.35343	0.179417	0.428134	-0.0021275	-1.09932	0.274654	0.502321
NVEC200_001544_1.1	3.71526	-0.23869	-1.68194	0.0961595	0.333856	-0.0103038	-0.0773427	0.938528	0.98288	-0.124497	-1.23817	0.218978	0.662175	0.0215087	1.43816	0.15397	0.35601	0.251546	2.70673	0.00817481	0.223268	0.228387	1.21498	0.227655	0.493788	-0.00436788	-1.38219	0.170446	0.375397
NVEC200_001545_1.1	6.26609	-0.0928135	-1.76463	0.0811281	0.303066	0.069537	1.3419	0.183114	0.504493	-0.0116382	-0.312894	0.755108	0.936698	-0.000975394	-0.16735	0.867482	0.939975	-0.0436173	-1.19422	0.235633	0.693684	0.16235	2.2156	0.0293247	0.136096	0.00404645	3.26159	0.00158214	0.0159205
NVEC200_001546_1.1	1.71323	0.0438236	0.200273	0.841733	0.936533	-0.153841	-0.741145	0.460598	0.76381	-0.0550087	-0.355021	0.723431	0.925246	0.0296532	1.26779	0.20825	0.428203	0.117549	0.804326	0.423397	0.820834	-0.197665	-0.674405	0.501839	0.742789	-0.00375615	-0.763907	0.446985	0.663451
NVEC200_001547_1.1	6.34728	-0.0604022	-0.902788	0.369127	0.659599	-0.060458	-0.919608	0.360315	0.691803	-0.0604301	-1.27713	0.204949	0.650733	0.000371664	0.0502642	0.960027	0.982647	-0.00863569	-0.186356	0.852599	0.96977	-5.57659e-05	-0.000599891	0.999523	0.999985	0.00240827	1.5284	0.130035	0.317129
NVEC200_001548_1.1	4.60612	0.0388801	0.429391	0.668699	0.852955	-0.206031	-2.35144	0.0209556	0.161053	-0.0835754	-1.30462	0.195456	0.643446	-0.016314	-1.65037	0.102465	0.276252	0.0542142	0.883197	0.379559	0.796689	-0.244911	-1.97764	0.0511292	0.199107	0.00195851	0.936255	0.351729	0.579956
NVEC200_001549_1.1	5.47086	-0.231539	-3.31563	0.00133404	0.0229702	-0.177087	-2.60241	0.0108773	0.114884	-0.204313	-4.13625	8.10638e-05	0.0423766	0.0237458	3.09501	0.00264593	0.0226526	0.0346773	0.721312	0.472648	0.841872	0.0544521	0.566035	0.572824	0.789495	0.00480266	2.93441	0.00427078	0.0326726
NVEC200_001550_1.1	3.78325	-0.224648	-2.00529	0.0480339	0.22774	-0.0268741	-0.24944	0.803607	0.936184	-0.125761	-1.58637	0.116276	0.564129	0.0220749	1.81524	0.0729258	0.221247	0.0803421	1.05948	0.292307	0.734423	0.197774	1.29911	0.197333	0.452415	0.000947463	0.368707	0.71324	0.850284
NVEC200_001551_1.1	5.5624	0.0252174	0.426977	0.670449	0.853968	0.0855439	1.48809	0.140336	0.444892	0.0553807	1.32562	0.18843	0.635546	0.000976458	0.151051	0.880285	0.94575	0.0647058	1.60165	0.112851	0.55943	0.0603265	0.742337	0.459879	0.715484	-0.00100161	-0.731748	0.466285	0.679574
NVEC200_001552_1.1	5.45873	-0.0756803	-1.12767	0.262553	0.561069	-0.0182143	-0.277032	0.782411	0.928228	-0.0469473	-0.989086	0.325358	0.748871	-0.00396899	-0.535572	0.593619	0.775964	-0.0225259	-0.487034	0.627457	0.904342	0.057466	0.618171	0.538074	0.76599	4.22188e-05	0.0268356	0.978652	0.991312
NVEC200_001553_1.1	3.90883	0.00590885	0.047857	0.96194	0.98553	0.127643	1.06129	0.291489	0.630145	0.0667759	0.764588	0.446582	0.813949	-0.0113745	-0.838222	0.404198	0.631975	-0.0303117	-0.359732	0.719918	0.931257	0.121734	0.715966	0.475926	0.725574	0.00113527	0.398489	0.691245	0.836433
NVEC200_001554_1.1	4.70135	-0.2276	-2.88389	0.0049475	0.0561113	0.0540785	0.701512	0.484852	0.779288	-0.0867609	-1.55426	0.123745	0.572622	0.0155139	1.78299	0.0780693	0.230773	-0.00216507	-0.0398597	0.968296	0.996277	0.281679	2.5845	0.0114154	0.0704602	-0.000257506	-0.139608	0.889292	0.946739
NVEC200_001555_1.1	0.47506	-0.668445	-1.2037	0.232409	0.528542	-0.481117	-0.897891	0.372055	0.701085	-0.574781	-1.46282	0.147603	0.597754	-0.0336464	-0.556313	0.579617	0.766381	0.106006	0.287322	0.774641	0.944807	0.187328	0.247377	0.805278	0.915792	0.0153444	1.1801	0.241608	0.463414
NVEC200_001556_1.1	5.42048	0.00718636	0.103491	0.917811	0.96697	-0.0913908	-1.35389	0.179272	0.497754	-0.0421022	-0.857118	0.39373	0.790241	-0.00305681	-0.402094	0.688599	0.841097	0.0517391	1.09051	0.278494	0.725843	-0.0985772	-1.03306	0.304434	0.574652	-0.00264311	-1.63751	0.10513	0.278309
NVEC200_001557_1.1	12.7059	0.0639998	1.28343	0.202743	0.494519	0.048917	0.993024	0.323447	0.657809	0.0564584	1.60105	0.112985	0.555435	-0.0118464	-2.14597	0.0346552	0.136933	0.0483338	1.39302	0.167157	0.627258	-0.0150828	-0.216522	0.829087	0.92795	0.000769872	0.65285	0.515571	0.718217
NVEC200_001558_1.1	3.00244	-0.688967	-4.12797	8.35418e-05	0.00286889	0.233581	1.47655	0.143401	0.449557	-0.227693	-1.92654	0.0572957	0.457695	0.0118178	0.669872	0.50471	0.714111	0.139914	1.28727	0.201408	0.657666	0.922548	4.13029	8.28394e-05	0.0016778	-0.00491135	-1.32027	0.190202	0.39958
NVEC200_001559_1.1	4.95755	-0.142592	-1.9962	0.0490328	0.231138	0.0975504	1.40815	0.162642	0.477556	-0.0225207	-0.445659	0.656949	0.903254	0.0190904	2.4457	0.0164674	0.0831075	0.0581989	1.1929	0.236147	0.694253	0.240142	2.4524	0.0161839	0.0904821	-0.00336874	-2.03876	0.0445037	0.162217
NVEC200_001560_1.1	3.92327	0.21346	1.74402	0.0846802	0.31058	-0.0797058	-0.673467	0.502432	0.789637	0.0668773	0.772295	0.442029	0.811272	-0.050223	-3.7575	0.000309557	0.00455226	0.00457591	0.0555529	0.955825	0.993059	-0.293166	-1.75262	0.0831833	0.271888	0.00581283	2.08184	0.0402889	0.151843
NVEC200_001561_1.1	5.25271	0.15904	2.18658	0.0314518	0.178795	-0.00157858	-0.0223802	0.982196	0.993837	0.0787306	1.53008	0.129618	0.577829	0.00921769	1.16303	0.247992	0.477647	0.0660279	1.33017	0.186931	0.650181	-0.160618	-1.611	0.110795	0.325392	-0.000885733	-0.529168	0.598034	0.776043
NVEC200_001562_1.1	6.20407	-0.234596	-3.70719	0.000367685	0.00879258	0.0230782	0.370542	0.711878	0.898637	-0.105759	-2.3632	0.0203418	0.356252	-0.0135213	-1.92795	0.0571171	0.190591	-0.0380595	-0.868796	0.387345	0.799667	0.257674	2.92582	0.00437948	0.0351904	0.00360669	2.41183	0.0179704	0.0896626
NVEC200_001563_1.1	6.50803	0.121465	2.40285	0.0183889	0.128549	-0.00979332	-0.196363	0.844783	0.951679	0.0558359	1.56194	0.121926	0.57212	-0.00977459	-1.74395	0.0846925	0.243786	-0.068419	-1.94702	0.0547527	0.449352	-0.131258	-1.86116	0.0660928	0.235862	-0.00447755	-3.75589	0.000311275	0.00461063
NVEC200_001564_1.1	4.36814	0.083327	0.918679	0.360799	0.651919	-0.113046	-1.28931	0.200702	0.527792	-0.0148593	-0.231548	0.817432	0.963155	-0.00744203	-0.752736	0.453637	0.674937	0.0300086	0.488067	0.626728	0.904037	-0.196373	-1.58466	0.116665	0.335738	-0.00355408	-1.70125	0.0924605	0.257174
NVEC200_001567_1.1	4.61207	-0.202569	-1.62368	0.108221	0.356406	0.141423	1.1664	0.24678	0.58071	-0.0305728	-0.346419	0.729901	0.926366	0.0248965	1.82192	0.0720546	0.219664	0.0275212	0.321802	0.748408	0.938266	0.343991	2.007	0.0479908	0.190815	0.00165895	0.575342	0.56661	0.753478
NVEC200_001568_1.1	3.77948	-0.251267	-2.52523	0.0133712	0.105853	0.201869	2.0567	0.0427047	0.239788	-0.0246985	-0.351003	0.726433	0.925665	0.0112646	1.01761	0.311679	0.544673	-0.115574	-1.6733	0.097853	0.53373	0.453136	3.26479	0.00156632	0.0167885	-0.00114866	-0.492713	0.623454	0.7931
NVEC200_001570_1.1	4.64031	-0.11738	-1.19402	0.23571	0.532015	0.0413205	0.42588	0.671245	0.876122	-0.0380296	-0.547038	0.585751	0.878491	0.0101346	0.925565	0.357228	0.589973	-0.11203	-1.63545	0.105561	0.549374	0.1587	1.15671	0.250553	0.519501	0.00318885	1.37802	0.171724	0.376727
NVEC200_001571_1.1	6.49902	-0.105858	-1.2449	0.216677	0.509824	0.0211903	0.252033	0.80164	0.934691	-0.0423339	-0.70402	0.483393	0.835209	-0.013737	-1.45219	0.150223	0.351222	-0.0893309	-1.50837	0.135263	0.588439	0.127048	1.06857	0.288367	0.558373	-0.00122287	-0.606734	0.545686	0.739173
NVEC200_001572_1.1	4.7137	0.00837689	0.0933615	0.925831	0.971429	-0.186701	-2.12246	0.0366359	0.220569	-0.0891622	-1.40506	0.163557	0.612852	0.0245944	2.47594	0.0152218	0.0788276	-0.0592416	-0.949303	0.345091	0.772384	-0.195078	-1.56846	0.120397	0.341344	0.00124933	0.59292	0.55477	0.745585
NVEC200_001573_1.1	3.469	0.204782	1.68955	0.0946884	0.331605	-0.151625	-1.30406	0.195648	0.521756	0.0265788	0.309851	0.757414	0.93754	0.0297714	2.2744	0.0253969	0.110759	0.0793773	0.965468	0.336981	0.766676	-0.356407	-2.16953	0.0327637	0.147006	-0.00258038	-0.938433	0.350615	0.578741
NVEC200_001574_1.1	4.33987	-0.0464648	-0.498981	0.61905	0.82643	-0.0774918	-0.85884	0.392784	0.716028	-0.0619783	-0.940803	0.349406	0.763933	-0.0104584	-1.0262	0.307638	0.540455	0.0238278	0.376953	0.707125	0.927493	-0.031027	-0.243283	0.808358	0.917042	0.000224472	0.104161	0.917281	0.960235
NVEC200_001575_1.1	4.22512	-0.24726	-2.46646	0.0156028	0.116608	0.251394	2.6111	0.0106248	0.113485	0.00206697	0.029135	0.976823	0.994953	-0.00419841	-0.387979	0.698977	0.848128	0.118897	1.77709	0.0790425	0.501848	0.498654	3.66554	0.000423515	0.00611833	-0.00400921	-1.76142	0.0816736	0.238135
NVEC200_001576_1.1	6.98678	0.38957	5.60434	2.40842e-07	2.55251e-05	-0.246952	-3.56535	0.000592618	0.0194284	0.071309	1.45076	0.150437	0.600549	0.0234198	3.015	0.00336578	0.0268459	-0.265075	-5.40502	5.57299e-07	0.00076127	-0.636523	-6.49816	4.86399e-09	4.42947e-07	0.00544784	3.2938	0.00142951	0.0147164
NVEC200_001577_1.1	5.57878	-0.0479169	-0.715279	0.476348	0.736632	-0.135615	-2.07639	0.040803	0.2331	-0.091766	-1.93662	0.0560315	0.454128	-0.00756771	-1.02881	0.306416	0.538899	0.0459139	0.999993	0.320082	0.755558	-0.0876983	-0.94978	0.34485	0.615324	0.00801333	5.11972	1.80842e-06	8.32686e-05
NVEC200_001578_1.1	3.50611	-0.298309	-2.95183	0.00405794	0.0495908	-0.079783	-0.799539	0.426151	0.741044	-0.189046	-2.64529	0.00968137	0.298294	-0.0234889	-2.07515	0.0409205	0.152865	-0.150186	-2.15109	0.0342361	0.385698	0.218526	1.54865	0.125088	0.349107	-0.00950493	-3.93375	0.00016754	0.00286074
NVEC200_001581_1.1	5.12032	0.0959291	1.24872	0.215111	0.508769	-0.112224	-1.49804	0.137736	0.441774	-0.00814738	-0.149937	0.88116	0.977497	-0.000274162	-0.0324885	0.974157	0.988917	-0.0133933	-0.254049	0.800056	0.953178	-0.208153	-1.9654	0.0525521	0.202531	-0.00150086	-0.83981	0.403313	0.625903
NVEC200_001582_1.1	5.82647	0.470147	6.0298	3.85806e-08	5.92887e-06	-0.322097	-4.26803	4.99736e-05	0.00357195	0.074025	1.34193	0.183103	0.631031	-0.0321225	-3.79521	0.000271846	0.00411418	0.0932585	1.76523	0.0810276	0.504637	-0.792244	-7.42732	7.0439e-11	1.17024e-08	-0.0150827	-8.3857	8.00709e-13	7.03137e-10
NVEC200_001583_1.1	4.13318	0.0388454	0.366912	0.714574	0.876394	-0.309227	-2.95621	0.00400602	0.0654222	-0.135191	-1.80573	0.0744126	0.493169	-0.010905	-0.922179	0.358981	0.591835	-0.109318	-1.48093	0.142231	0.597047	-0.348072	-2.35312	0.0208668	0.108061	0.0114132	4.54855	1.73509e-05	0.000498393
NVEC200_001584_1.1	5.14706	0.0773237	1.07675	0.284562	0.582194	-0.0589353	-0.836563	0.405126	0.724981	0.00919419	0.181031	0.856764	0.970845	0.00903152	1.13783	0.258311	0.48849	-0.0585617	-1.17751	0.242198	0.700182	-0.136259	-1.3679	0.174858	0.420948	0.000751043	0.447123	0.655896	0.814054
NVEC200_001585_1.1	5.47718	-0.0485708	-0.635987	0.526451	0.768386	0.0585203	0.78051	0.437205	0.747566	0.00497479	0.0921063	0.926825	0.987224	0.049114	5.8105	9.98062e-08	7.09259e-06	-0.0288192	-0.540284	0.590379	0.890175	0.107091	1.01015	0.315219	0.584774	0.00231118	1.29206	0.199753	0.411626
NVEC200_001587_1.1	4.20229	0.0226863	0.188064	0.851264	0.939784	0.180654	1.52728	0.130311	0.430597	0.10167	1.1917	0.236615	0.679944	0.0049382	0.370955	0.711571	0.855137	-0.0778677	-0.937471	0.351107	0.77768	0.157967	0.944524	0.347513	0.618249	0.000477746	0.171228	0.864441	0.934527
NVEC200_001588_1.1	4.89109	-0.16242	-1.89424	0.0615087	0.259862	0.181775	2.15466	0.0339463	0.211113	0.00967764	0.159597	0.873568	0.975469	0.00063987	0.0672858	0.946508	0.975387	-0.0561124	-0.94591	0.346809	0.774088	0.344195	2.88532	0.00492709	0.0383135	0.000719297	0.358065	0.72116	0.855338
NVEC200_001590_1.1	1.65648	0.0813212	0.332883	0.740022	0.889329	0.475599	1.90471	0.060116	0.287575	0.27846	1.61161	0.110661	0.550828	-0.0272128	-0.978685	0.330444	0.564233	-0.344939	-1.99882	0.0487434	0.434904	0.394278	1.1168	0.26715	0.536483	-0.000500379	-0.0873358	0.930605	0.966942
NVEC200_001591_1.1	3.20984	0.0397897	0.300469	0.764535	0.900997	-0.128038	-1.00541	0.317484	0.652937	-0.0441244	-0.470858	0.638918	0.896687	-0.012231	-0.849899	0.39771	0.626275	0.0292347	0.328084	0.743635	0.937844	-0.167828	-0.932633	0.353585	0.624566	0.00504446	1.66817	0.0988707	0.268235
NVEC200_001592_1.1	1.63144	0.630629	2.58909	0.0112752	0.0953823	0.0525462	0.229976	0.818649	0.941291	0.341587	1.97924	0.0509446	0.448099	-0.0397982	-1.56992	0.120057	0.304742	0.15982	1.01813	0.311432	0.749624	-0.578083	-1.79322	0.0764059	0.258343	-0.00248844	-0.477842	0.633959	0.800501
NVEC200_001595_1.1	5.35035	-0.0833671	-1.01376	0.313503	0.606604	-0.0537566	-0.671027	0.503978	0.789983	-0.0685618	-1.17866	0.241741	0.682749	0.0181714	2.01289	0.0472116	0.167994	0.0339554	0.600846	0.549502	0.878489	0.0296105	0.261454	0.794359	0.911714	-0.000642355	-0.3351	0.738355	0.866773
NVEC200_001596_1.1	5.78776	-0.253106	-3.24393	0.00167218	0.0269923	0.114779	1.50792	0.135192	0.438303	-0.0691635	-1.25323	0.213475	0.659624	0.0197185	2.30166	0.0237385	0.105931	0.0699195	1.30325	0.19592	0.654225	0.367884	3.41863	0.000958961	0.0114795	0.00226995	1.24591	0.216136	0.432342
NVEC200_001598_1.1	3.52677	-0.117499	-0.887753	0.377116	0.665557	-0.0134492	-0.105521	0.916205	0.974632	-0.0654743	-0.69909	0.486357	0.836073	0.0249101	1.73056	0.0870692	0.247871	0.0341676	0.38026	0.704678	0.926755	0.10405	0.577702	0.564955	0.784848	0.000848943	0.279734	0.780344	0.890766
NVEC200_001599_1.1	7.00499	-0.030626	-0.68024	0.498155	0.752019	0.109187	2.46463	0.0156773	0.138803	0.0392804	1.23369	0.220635	0.664499	-0.0037708	-0.758208	0.450372	0.671542	0.0411494	1.31906	0.190604	0.650869	0.139813	2.23189	0.0281867	0.133228	-0.00395984	-3.73435	0.000335132	0.00490489
NVEC200_001600_1.1	3.01076	0.159853	1.22296	0.224641	0.519671	0.00493075	0.0389022	0.969057	0.989833	0.0823918	0.891015	0.375374	0.778067	-0.0393466	-2.74546	0.00733827	0.0467005	-0.0252439	-0.285925	0.775614	0.945009	-0.154922	-0.864727	0.389562	0.65832	0.00683599	2.29402	0.0241936	0.108514
NVEC200_001601_1.1	3.54479	-0.210893	-1.75824	0.0822163	0.305224	0.0795888	0.687981	0.493291	0.784803	-0.0656522	-0.773564	0.441282	0.811272	0.0245428	1.87913	0.0635685	0.20381	0.0632958	0.776177	0.439745	0.826801	0.290482	1.77679	0.0790922	0.264085	-0.00451969	-1.64056	0.104493	0.27728
NVEC200_001604_1.1	12.529	0.0289025	0.478186	0.633783	0.833438	0.00307605	0.05138	0.959147	0.98747	0.0159893	0.374098	0.709292	0.921568	-0.0120392	-1.79417	0.0764513	0.227849	-0.0618039	-1.46458	0.146838	0.604767	-0.0258265	-0.30505	0.761097	0.895384	0.00707448	4.93363	4.13262e-06	0.000156572
NVEC200_001605_1.1	5.47251	-0.184506	-2.20738	0.029914	0.174265	-0.205379	-2.49242	0.0145787	0.134152	-0.194942	-3.29795	0.00141091	0.170777	0.008926	0.960138	0.339642	0.573172	-0.108606	-1.86611	0.0653889	0.471845	-0.0208725	-0.179131	0.85825	0.943044	0.00516213	2.60308	0.0108576	0.0631425
NVEC200_001606_1.1	2.36294	0.152643	0.752957	0.453505	0.721262	0.300299	1.55082	0.124567	0.420723	0.226471	1.57821	0.118141	0.566585	-0.0126278	-0.584718	0.560248	0.75337	0.103448	0.774253	0.440876	0.827501	0.147656	0.539818	0.590699	0.800728	0.000695741	0.157073	0.875551	0.940993
NVEC200_001607_1.1	4.75447	-0.125319	-1.52411	0.131101	0.392264	0.281653	3.50759	0.000717353	0.0217428	0.0781671	1.34405	0.18242	0.631031	0.0054653	0.605266	0.546575	0.743947	-0.00161602	-0.0287046	0.977166	0.997669	0.406973	3.58486	0.000555349	0.00751096	-0.00212938	-1.1206	0.265537	0.491718
NVEC200_001608_1.1	0.849569	0.0552878	0.195742	0.845268	0.938035	0.351287	1.31305	0.192611	0.518152	0.203287	1.01634	0.312281	0.740456	0.0445665	1.49037	0.139735	0.336051	0.200488	1.06847	0.288257	0.731784	0.295999	0.783634	0.435379	0.698037	0.0106049	1.72306	0.0884239	0.250365
NVEC200_001610_1.1	2.79109	0.45444	2.45607	0.0160304	0.118722	-0.180427	-1.0166	0.312157	0.649021	0.137007	1.04627	0.298329	0.730028	-0.0221353	-1.11232	0.269059	0.499067	0.0766552	0.619276	0.53735	0.872448	-0.634867	-2.53179	0.0131408	0.0771137	-0.0142968	-3.39428	0.00103742	0.0115422
NVEC200_001611_1.1	6.72573	0.0232407	0.431591	0.667105	0.852269	-0.00566601	-0.106326	0.915568	0.974376	0.00878734	0.230766	0.818037	0.963155	-0.00710744	-1.18664	0.238595	0.466787	-0.0962377	-2.56114	0.0121531	0.26075	-0.0289067	-0.383593	0.702214	0.864687	-0.00454797	-3.56352	0.000596234	0.0076366
NVEC200_001612_1.1	4.15544	0.0502504	0.545605	0.586731	0.807064	0.130128	1.43847	0.15388	0.465962	0.0901892	1.38464	0.169695	0.621223	0.00982563	0.962936	0.338243	0.571911	-0.0904065	-1.4184	0.159639	0.62164	0.0798775	0.624473	0.533948	0.762588	-0.00845246	-3.92615	0.000172093	0.00292225
NVEC200_001613_1.1	5.47815	-0.0465303	-0.582068	0.562023	0.791196	-0.0590897	-0.759447	0.449634	0.756453	-0.05281	-0.933921	0.352924	0.766769	0.0195611	2.23207	0.0281741	0.118674	0.0445917	0.812014	0.418996	0.819142	-0.0125594	-0.114185	0.909354	0.965971	-0.001106	-0.594259	0.553878	0.744819
NVEC200_001614_1.1	5.03986	-0.101712	-1.50444	0.136083	0.400431	0.269942	4.08554	9.74232e-05	0.00549413	0.0841152	1.75905	0.0820781	0.505136	0.00784827	1.05627	0.293762	0.526472	0.0134886	0.290693	0.771977	0.944294	0.371654	3.97853	0.000142958	0.00261524	0.000237771	0.151809	0.879688	0.942967
NVEC200_001615_1.1	7.44176	0.0350986	0.833677	0.406742	0.687288	-0.00238779	-0.0575048	0.954275	0.987195	0.0163554	0.549342	0.584175	0.878192	0.00277808	0.596317	0.552509	0.747996	0.0176167	0.601874	0.54882	0.878292	-0.0374864	-0.638425	0.524871	0.757723	-0.00420867	-4.23202	5.70857e-05	0.00121211
NVEC200_001616_1.1	3.31068	-0.0252171	-0.187174	0.851959	0.940188	0.155171	1.19717	0.234485	0.567787	0.0649768	0.681549	0.497331	0.841895	0.0612693	4.18618	6.75574e-05	0.0014101	0.0949775	1.02796	0.306811	0.745902	0.180388	0.984897	0.3274	0.597756	-0.00338313	-1.10723	0.271243	0.49865
NVEC200_001617_1.1	1.22542	-0.123804	-0.400527	0.689748	0.864722	-0.58961	-2.01931	0.0465268	0.251999	-0.356707	-1.62935	0.106847	0.543237	0.00561011	0.171211	0.864454	0.938503	0.270271	1.31964	0.190411	0.650855	-0.465806	-1.13012	0.261527	0.531265	0.0150401	2.14588	0.0346626	0.137955
[truncated: 10,936 more rows]

## Sheet: RAIN output+Annotations
Gene	Rhythmic P-value (Aligned) - RAIN	Phase (Aligned) - CircaCompare	Amplitude (Aligned) - CircaCompare	Rhythmic P-value (SC) - RAIN	Phase (SC) - CircaCompare	Amplitude (SC) - CircaCompare	Circatidal P-value (Align) - RAIN	Circatidal P-value (SC) - RAIN	Symbol	Name	Annotation	Interpro_Pfam	GO	KEGG
[truncated: 15,280 more rows]

[truncated: 3 more sheets: WGCNA modules, ECHO output, DryR output]
